# Supplementary material
Source: PubMed Central journal article supplement (PMC6953633)
Supplement: NIHMS1064133-supplement-Sup1.pdf [file NIHMS1064133-supplement-Sup1.pdf]

In the format provided by the authors and unedited.

# Genome-wide association study of post-traumatic stress disorder reexperiencing symptoms in >165,000 US veterans

Joel Gelernter <sup>1,2,16\*</sup>, Ning Sun<sup>3,4</sup>, Renato Polimanti<sup>1,2</sup>, Robert. Pietrzak<sup>1,2</sup>, Daniel F. Levey<sup>1,2</sup>, Julien Bryois <sup>5</sup>, Qiongshi Lu <sup>4</sup>, Yiming Hu<sup>4</sup>, Boyang Li <sup>4</sup>, Krishnan Radhakrishnan<sup>3,6</sup>, Mihaela Aslan<sup>3,7</sup>, Kei-Hoi Cheung<sup>3,8</sup>, Yuli Li<sup>3,9</sup>, Nallakkandi Rajeevan <sup>3,9</sup>, Frederick Sayward<sup>3,9</sup>, Kelly Harrington<sup>10,11</sup>, Quan Chen<sup>3,4</sup>, Kelly Cho<sup>10,12</sup>, Saiju Pyarajan<sup>10,12</sup>, Patrick F. Sullivan <sup>5,13</sup>, Rachel Quaden<sup>10</sup>, Yunling Shi<sup>10</sup>, Haley Hunter-Zinck<sup>10</sup>, J. Michael Gaziano<sup>10,12</sup>, John Concato<sup>3,7</sup>, Hongyu Zhao <sup>3,4</sup>, Murray B. Stein <sup>14,15,16\*</sup> and Department of Veterans Affairs Cooperative Studies Program (#575B) and Million Veteran Program<sup>17</sup>

<sup>1</sup>Psychiatry Service, VA Connecticut Healthcare System, West Haven, CT, USA. <sup>2</sup>Department of Psychiatry, Yale University School of Medicine, New Haven, CT, USA. <sup>3</sup>VA Clinical Epidemiology Research Center (CERC), VA Connecticut Healthcare System, West Haven, CT, USA. <sup>4</sup>Department of Biostatistics, Yale University School of Public Health, New Haven, CT, USA. <sup>5</sup>Department of Medical Epidemiology and Biostatistics, Karolinska Institutet, Stockholm, Sweden. <sup>6</sup>College of Medicine, University of Kentucky, Lexington, KY, USA. <sup>7</sup>Department of Medicine, Yale University School of Medicine, New Haven, CT, USA. <sup>8</sup>Department of Emergency Medicine, Yale University School of Medicine, New Haven, CT, USA. <sup>9</sup>Yale Center for Medical Informatics, Yale University School of Medicine, New Haven, CT, USA. <sup>10</sup>Massachusetts Veterans Epidemiology Research and Information Center (MAVERIC), VA Boston Healthcare System, Boston, MA, USA. <sup>11</sup>Department of Psychiatry, Boston University School of Medicine, Boston, MA, USA. <sup>12</sup>Department of Medicine, Brigham and Women's Hospital, Harvard Medical School, Boston, MA, USA. <sup>13</sup>Departments of Genetics and Psychiatry, University of North Carolina, Chapel Hill, NC, USA. <sup>14</sup>Psychiatry Service, VA San Diego Healthcare System, San Diego, CA, USA. <sup>15</sup>Departments of Psychiatry and of Family Medicine and Public Health, University of California San Diego, La Jolla, CA, USA. <sup>16</sup>These authors contributed equally: J. Gelernter, M. B. Stein. <sup>17</sup>A list of members and affiliations appears in the Supplementary Note. \*e-mail: [joel.gelernter@yale.edu](mailto:joel.gelernter@yale.edu); [mstein@ucsd.edu](mailto:mstein@ucsd.edu)

Figure S1a.

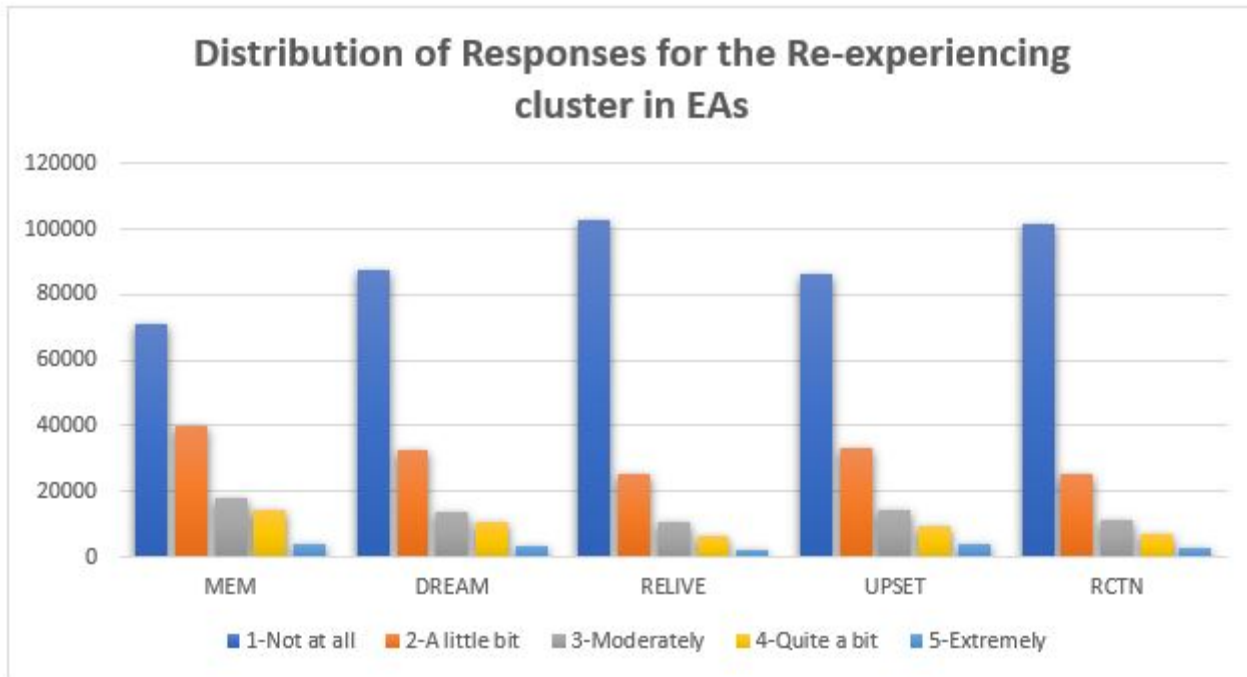

Figure S1b.

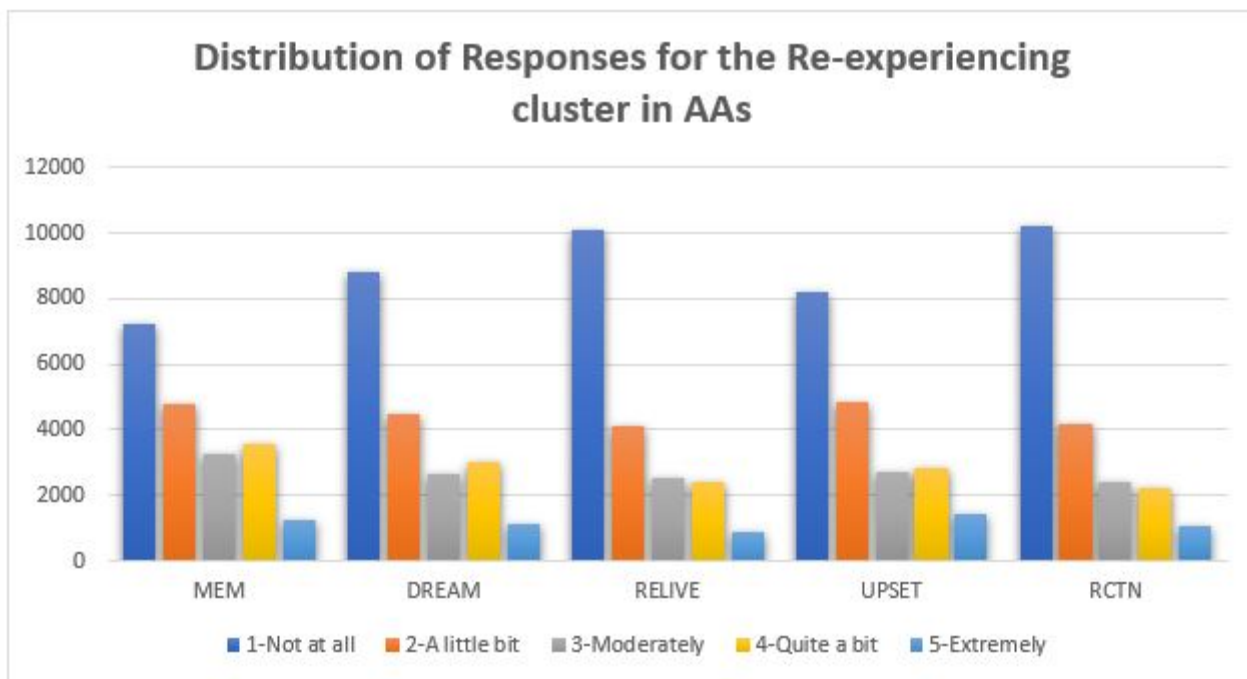

Supplementary Figure 1

Distribution of Responses for the Re-experiencing cluster

S1a: Distribution in EAs (EUR). S1b: Distribution in AAs (AFR).

pcl.c.aa (SNP-level)  $\lambda = 1.01$

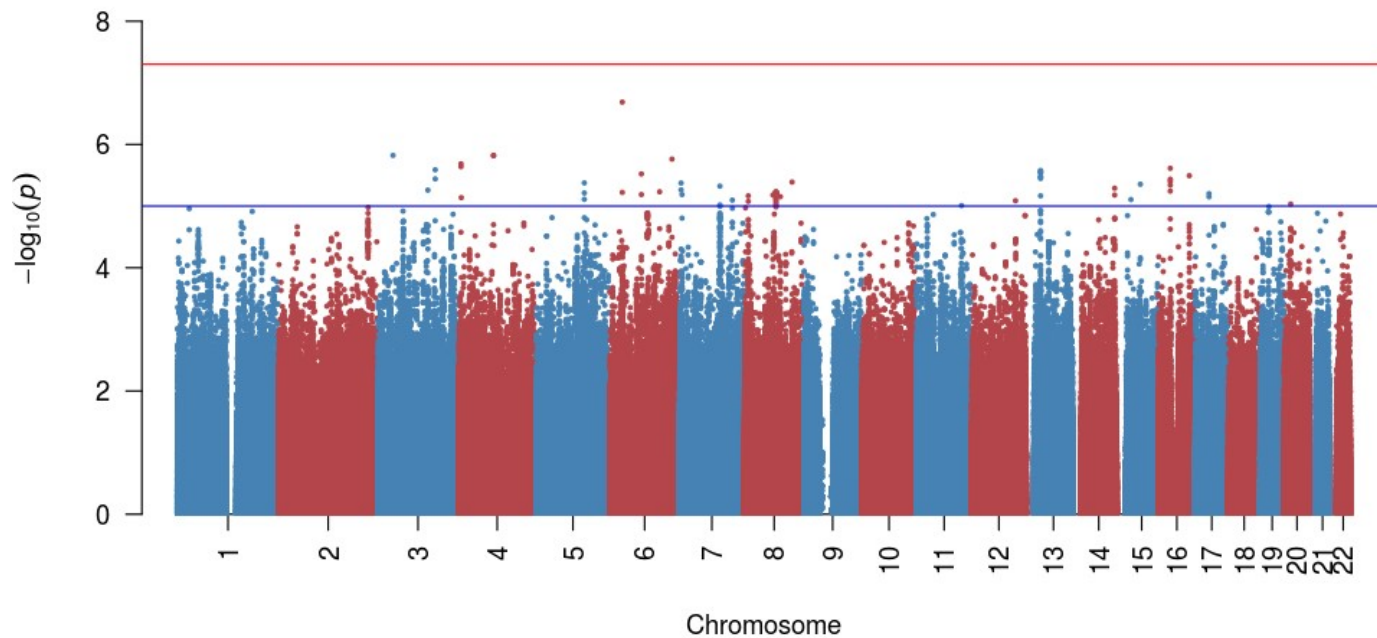

### Supplementary Figure 2

Manhattan plot, AA (AFR) subsample.

Manhattan plot, AA subsample (N=19,983). Negative logarithm of the association two-sided p value (from a linear regression model) for each variant tested is reported on the y-axis. Red and blue lines indicates the Bonferroni multiple testing correction and suggestive significances, respectively.

Plotted SNPs

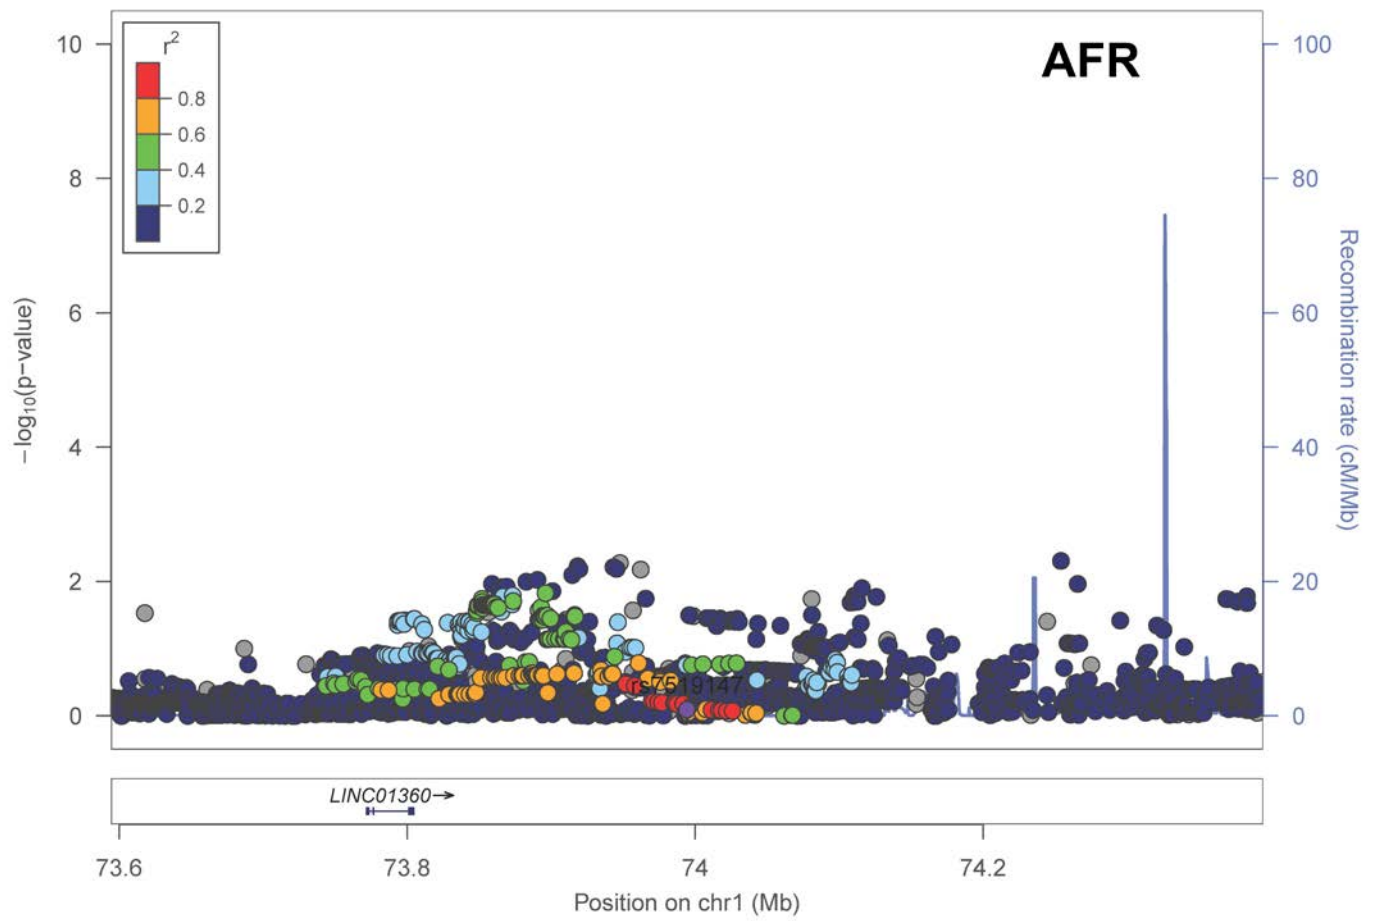

Plotted SNPs

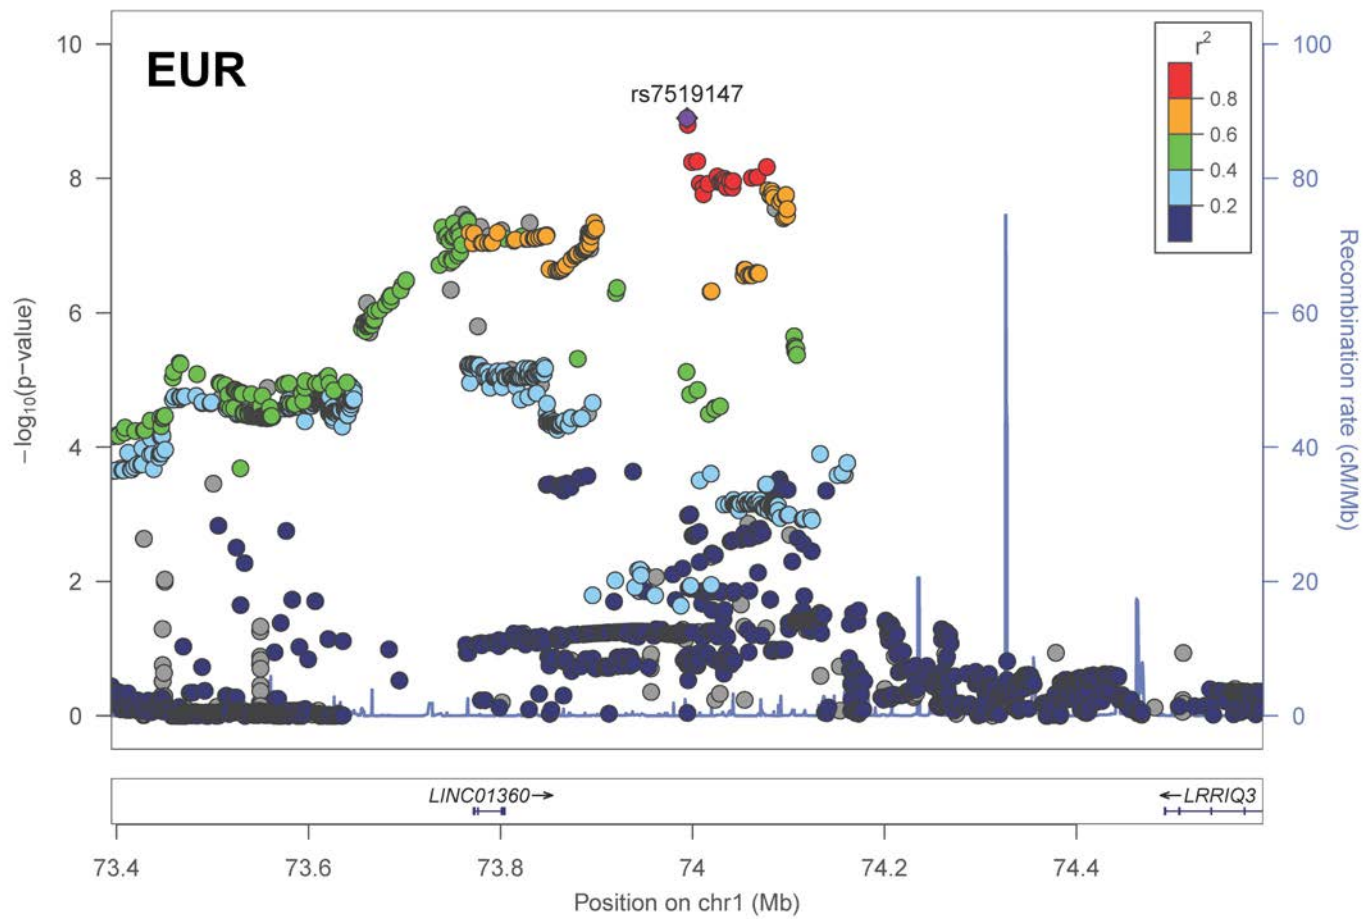

Plotted SNPs

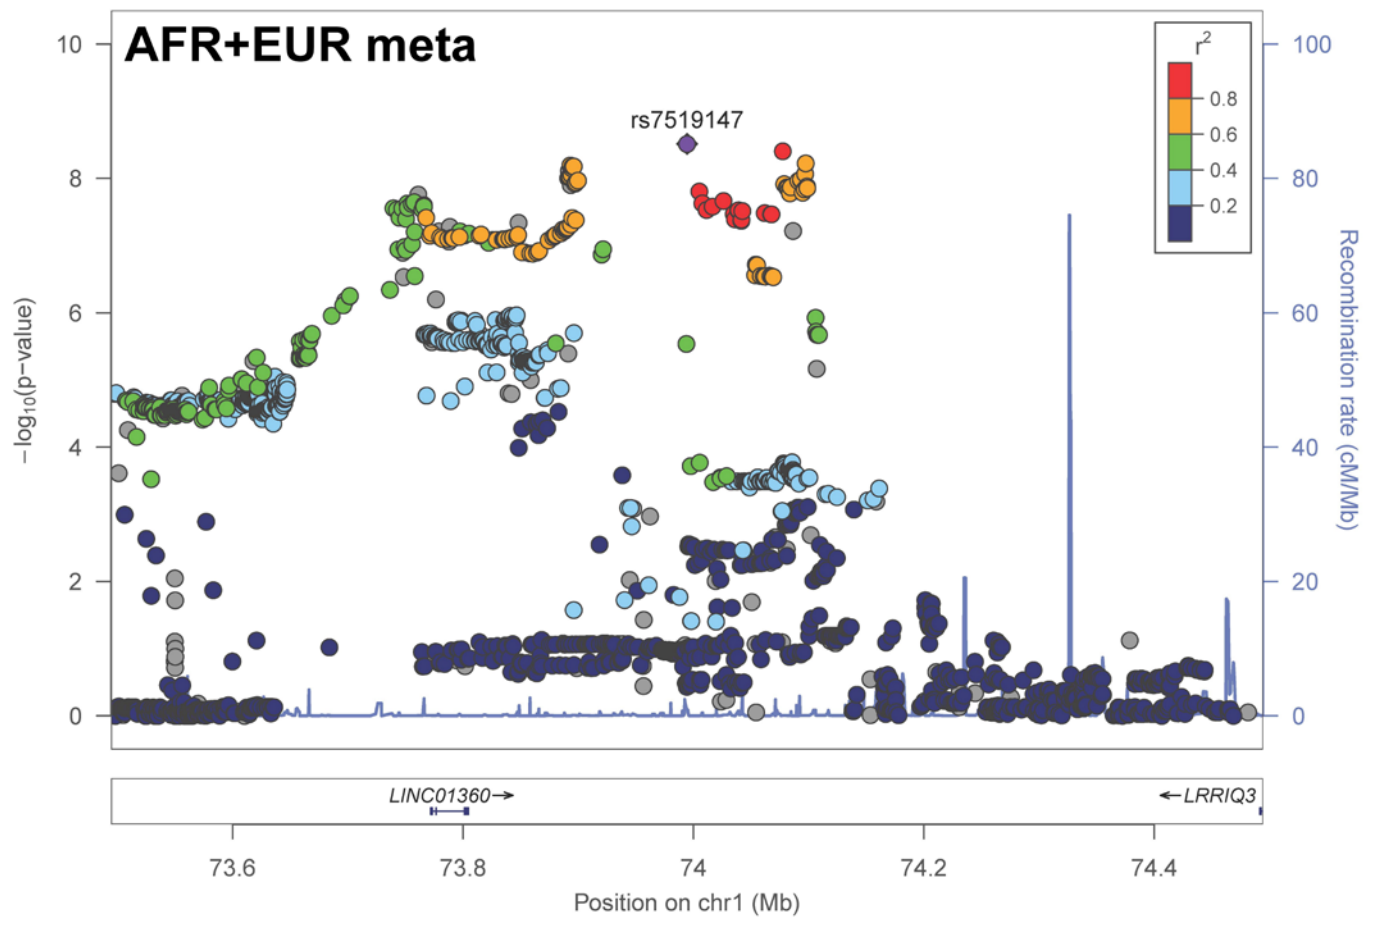

Plotted SNPs

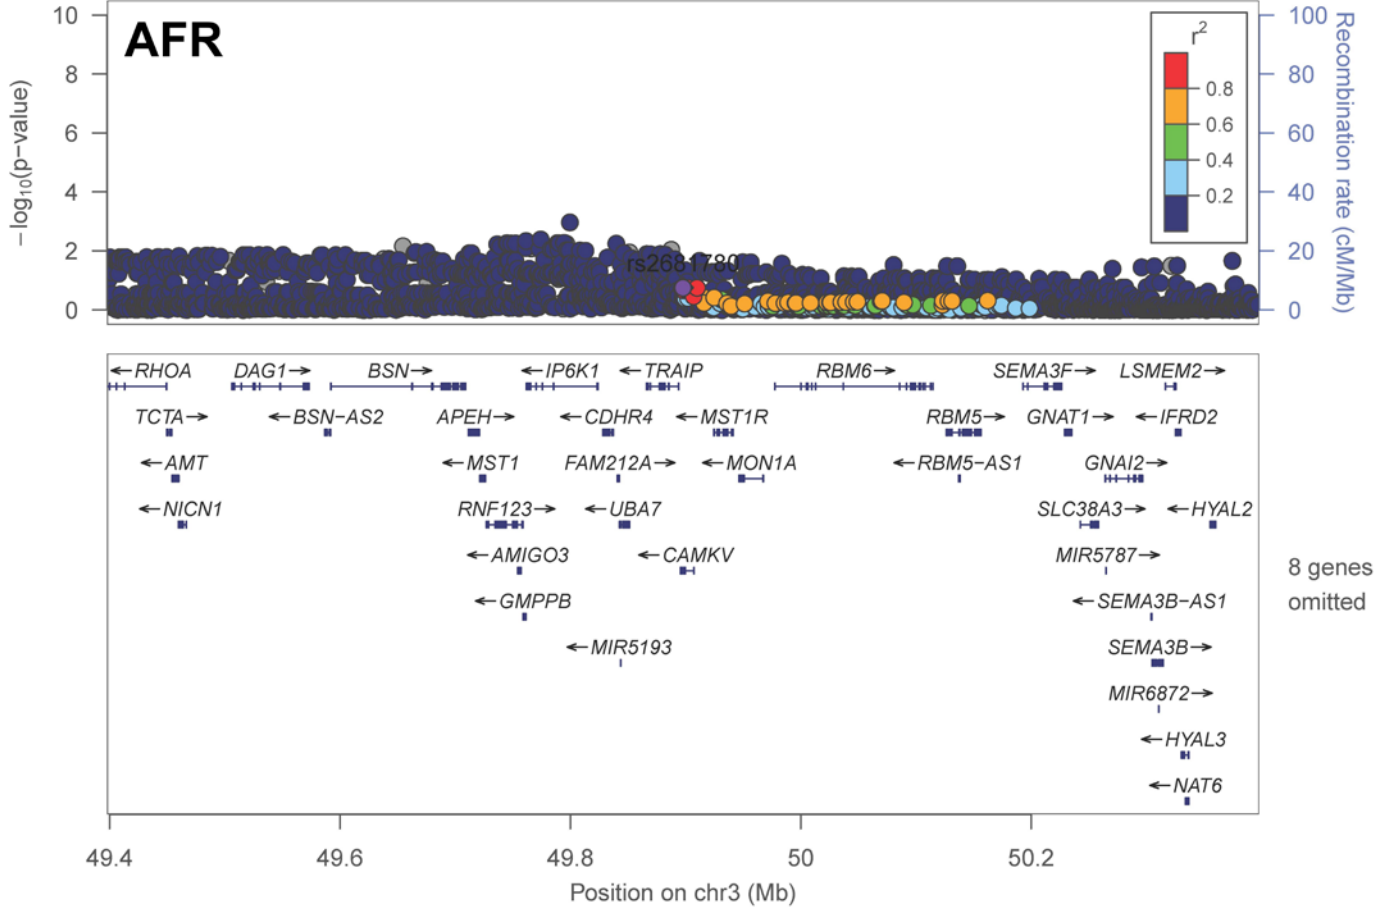



Plotted SNPs

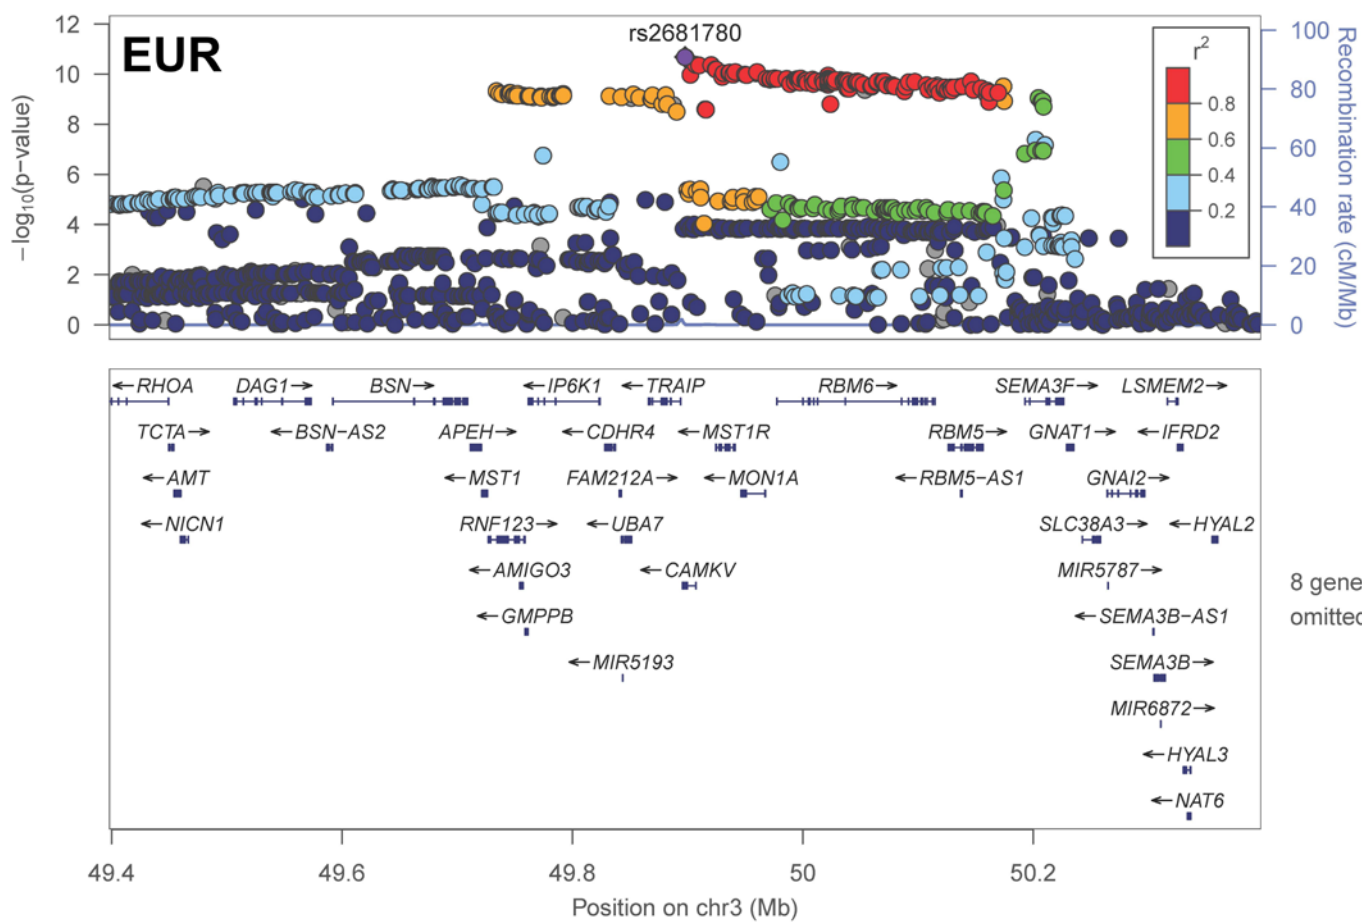

Plotted SNPs

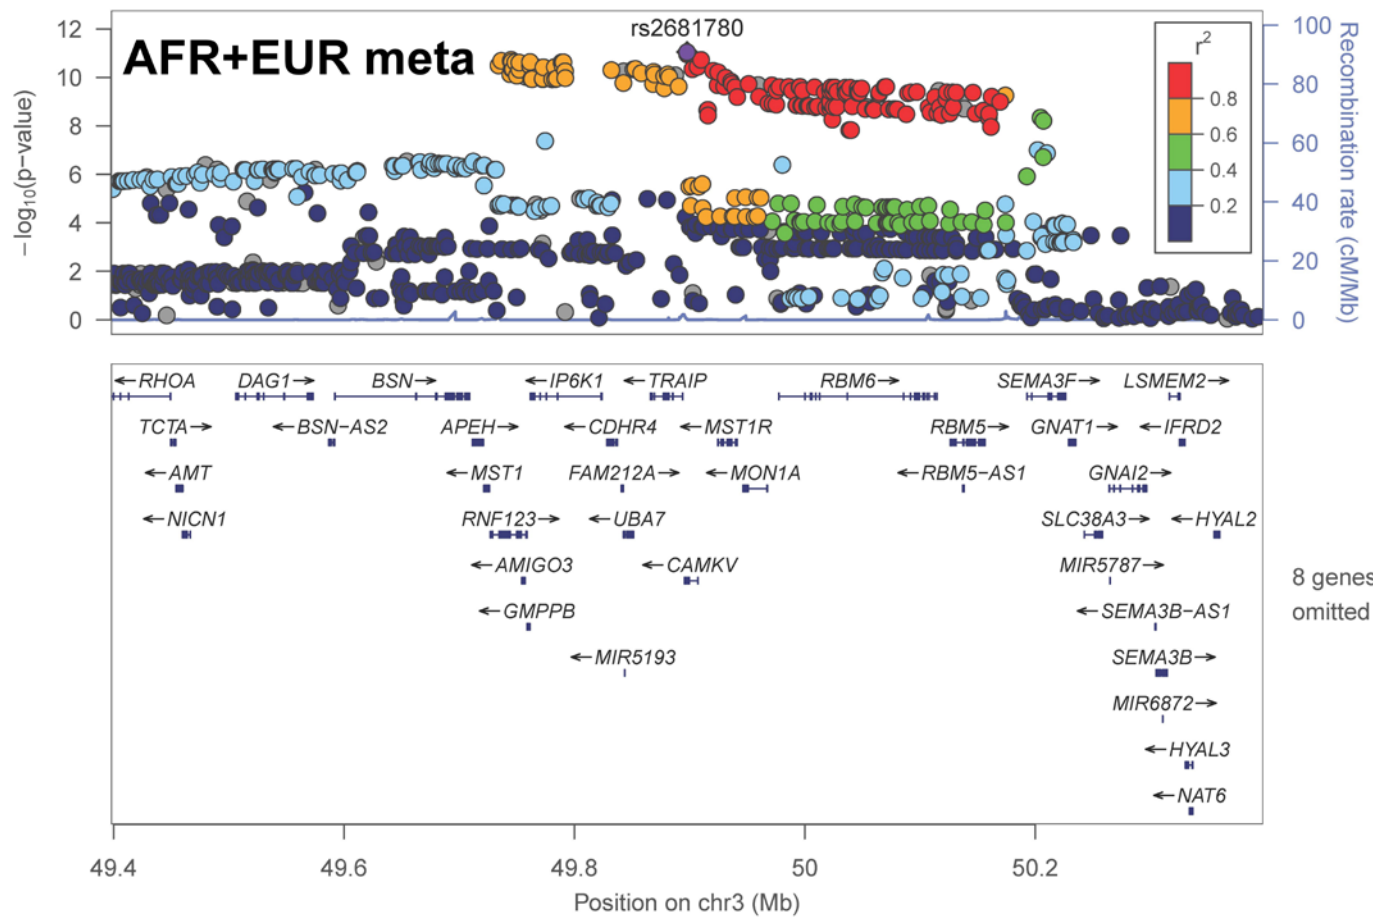

Plotted SNPs

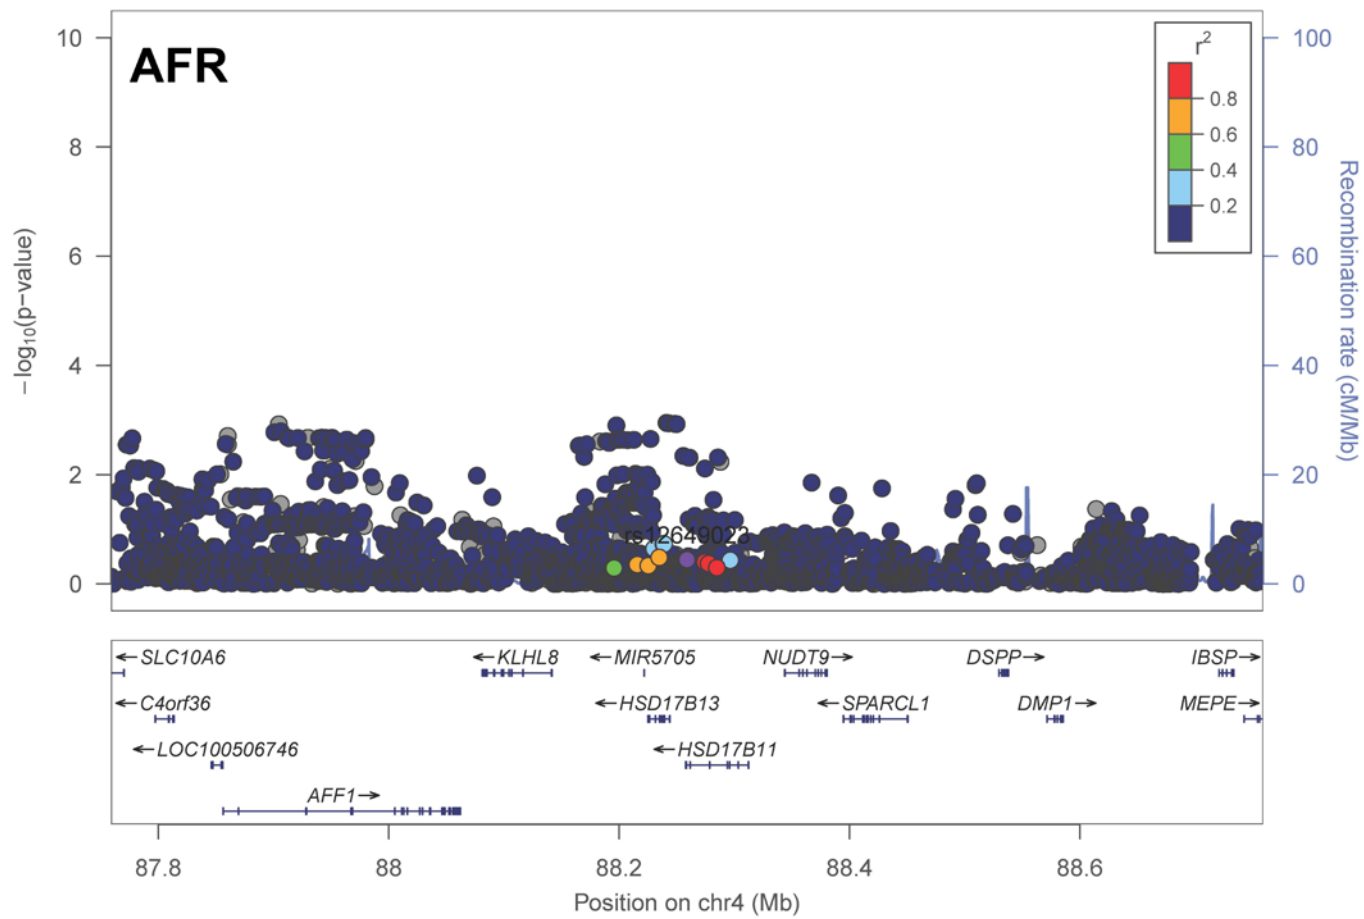

Plotted SNPs

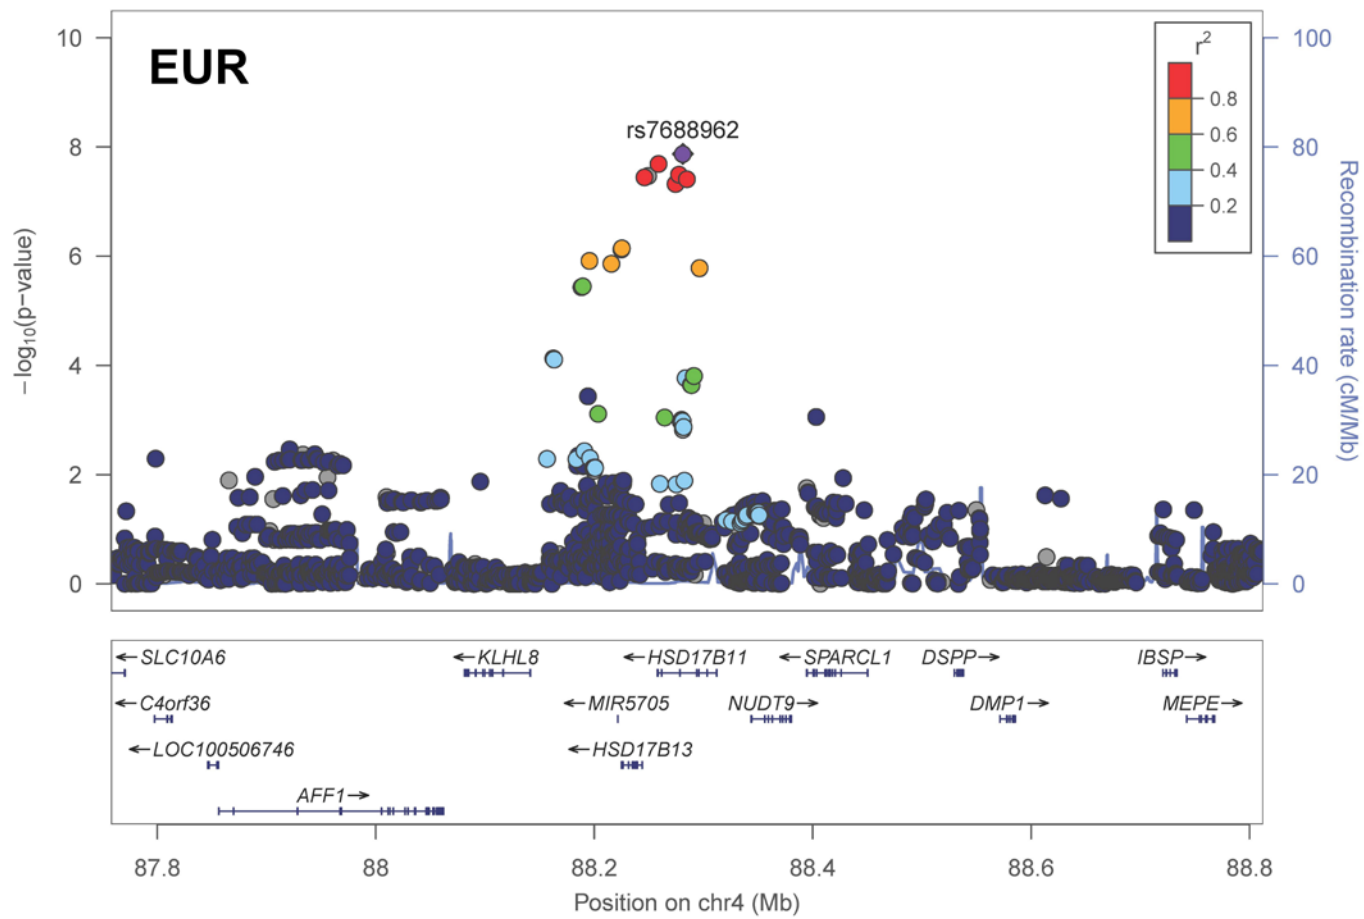

Plotted SNPs

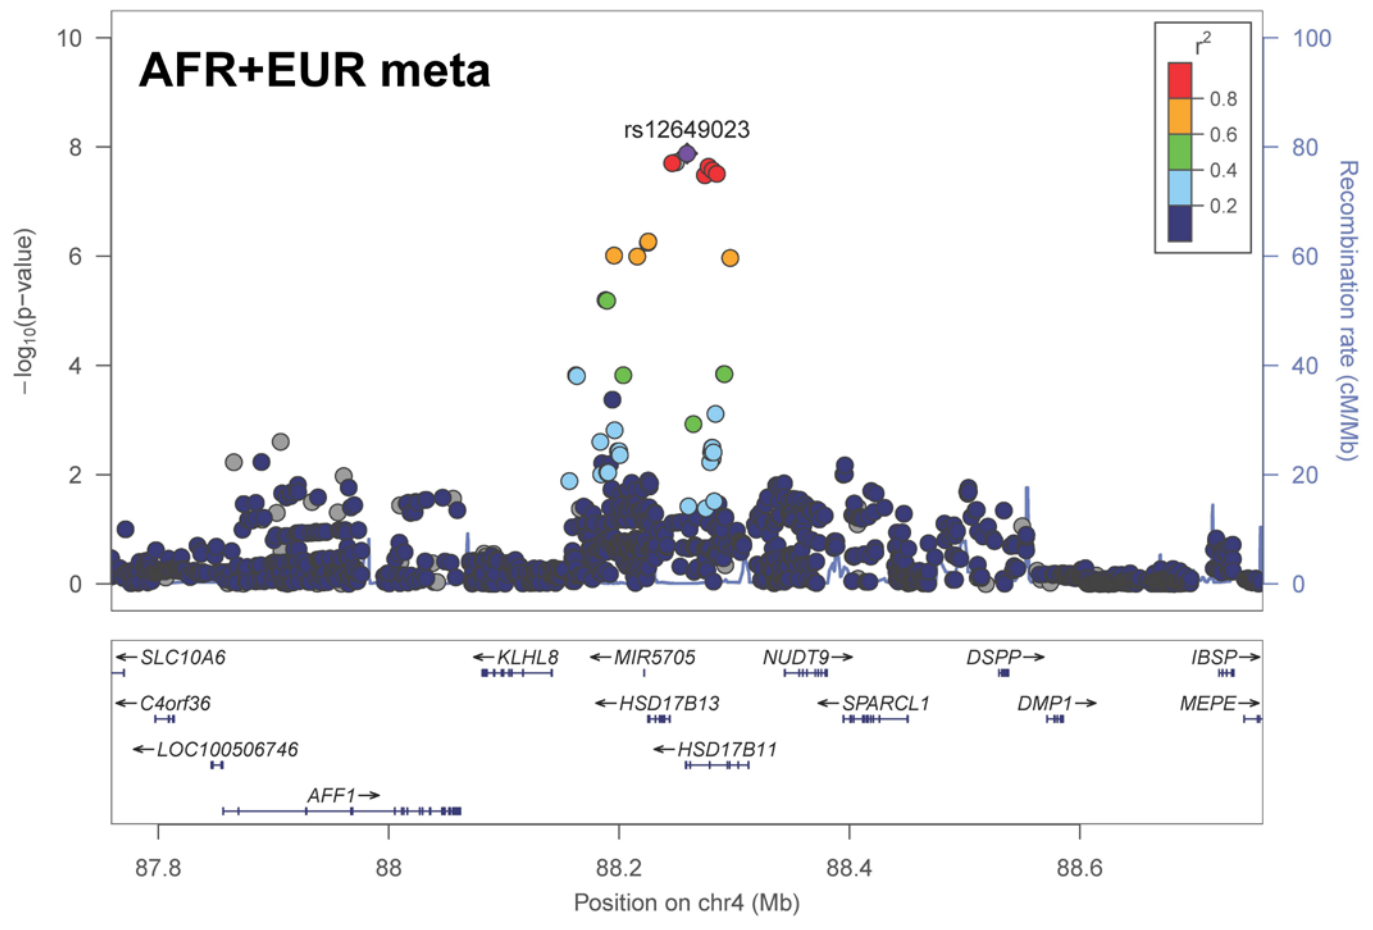

Plotted SNPs

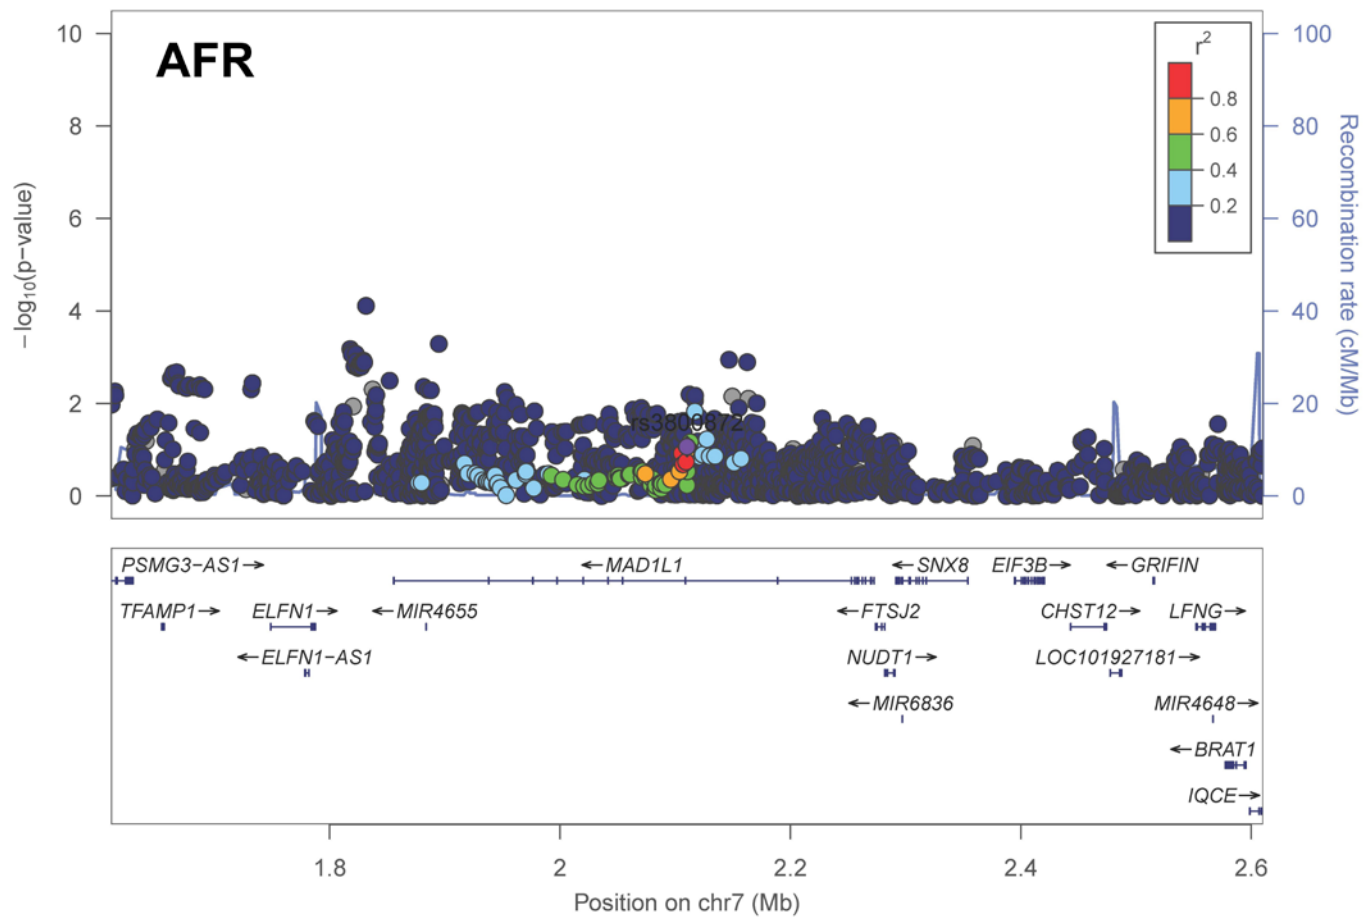

Plotted SNPs

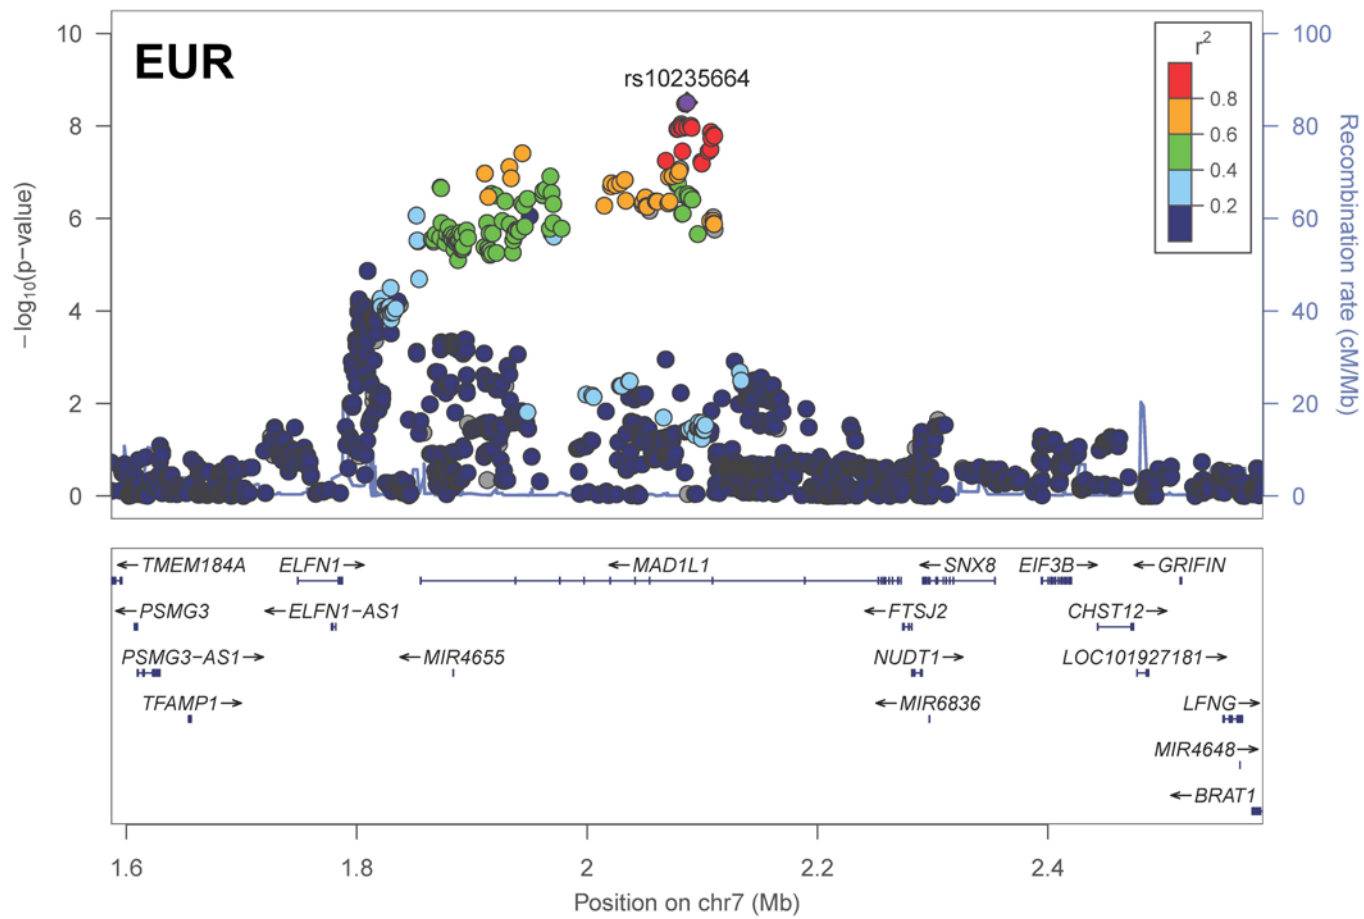

Plotted SNPs

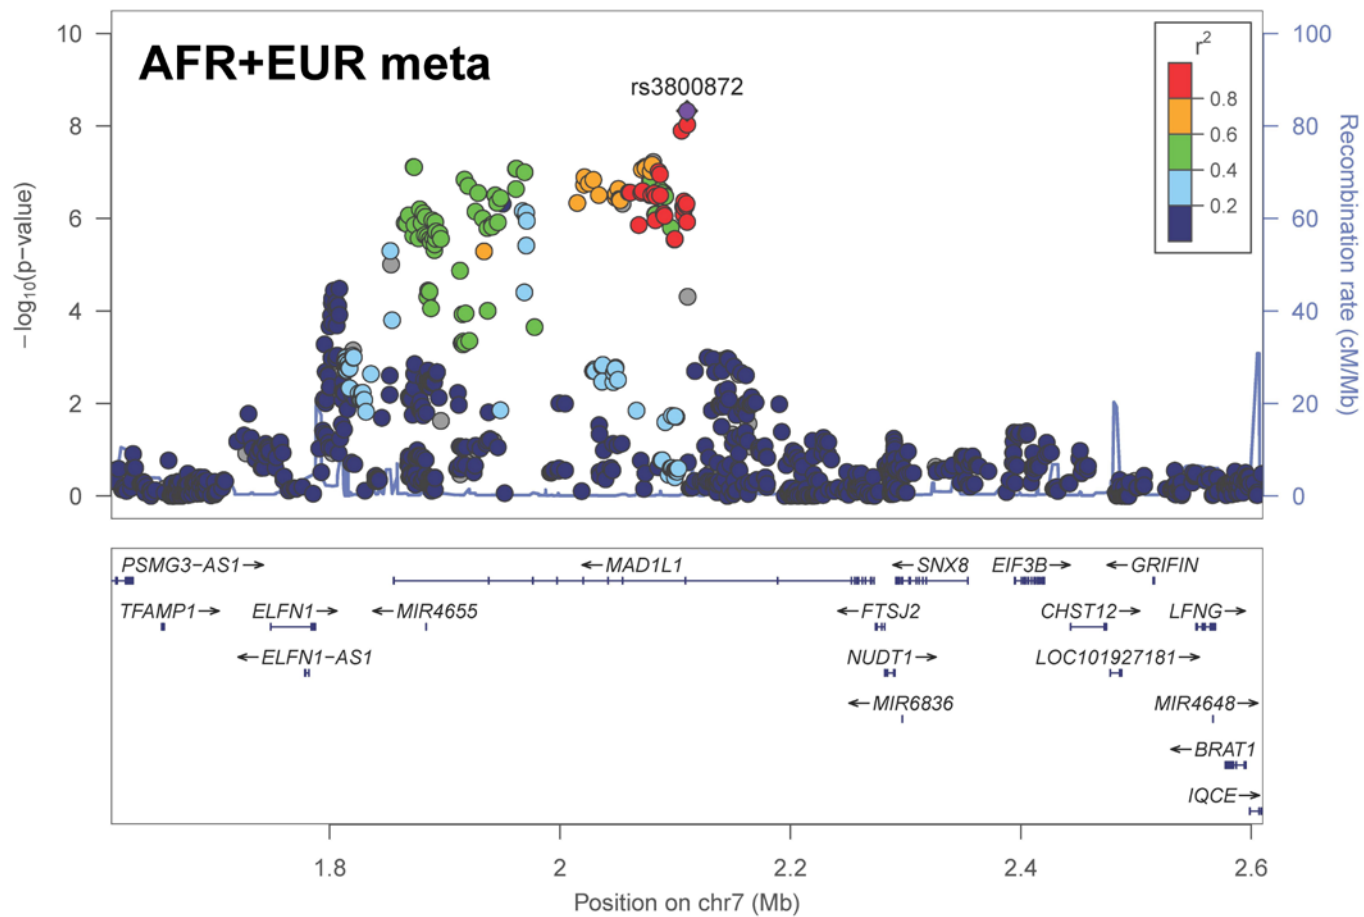



Plotted SNPs

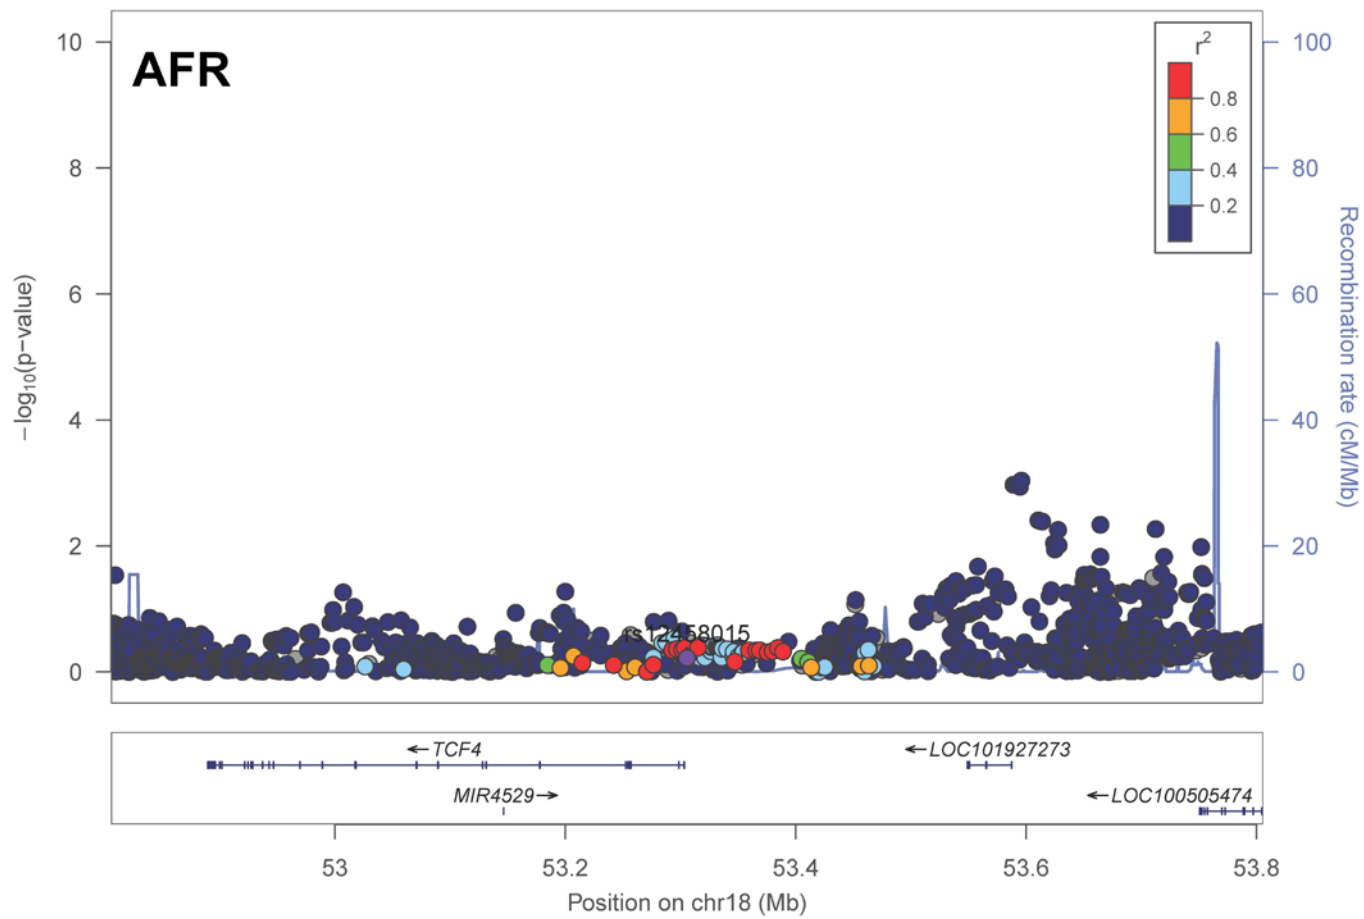

Plotted SNPs

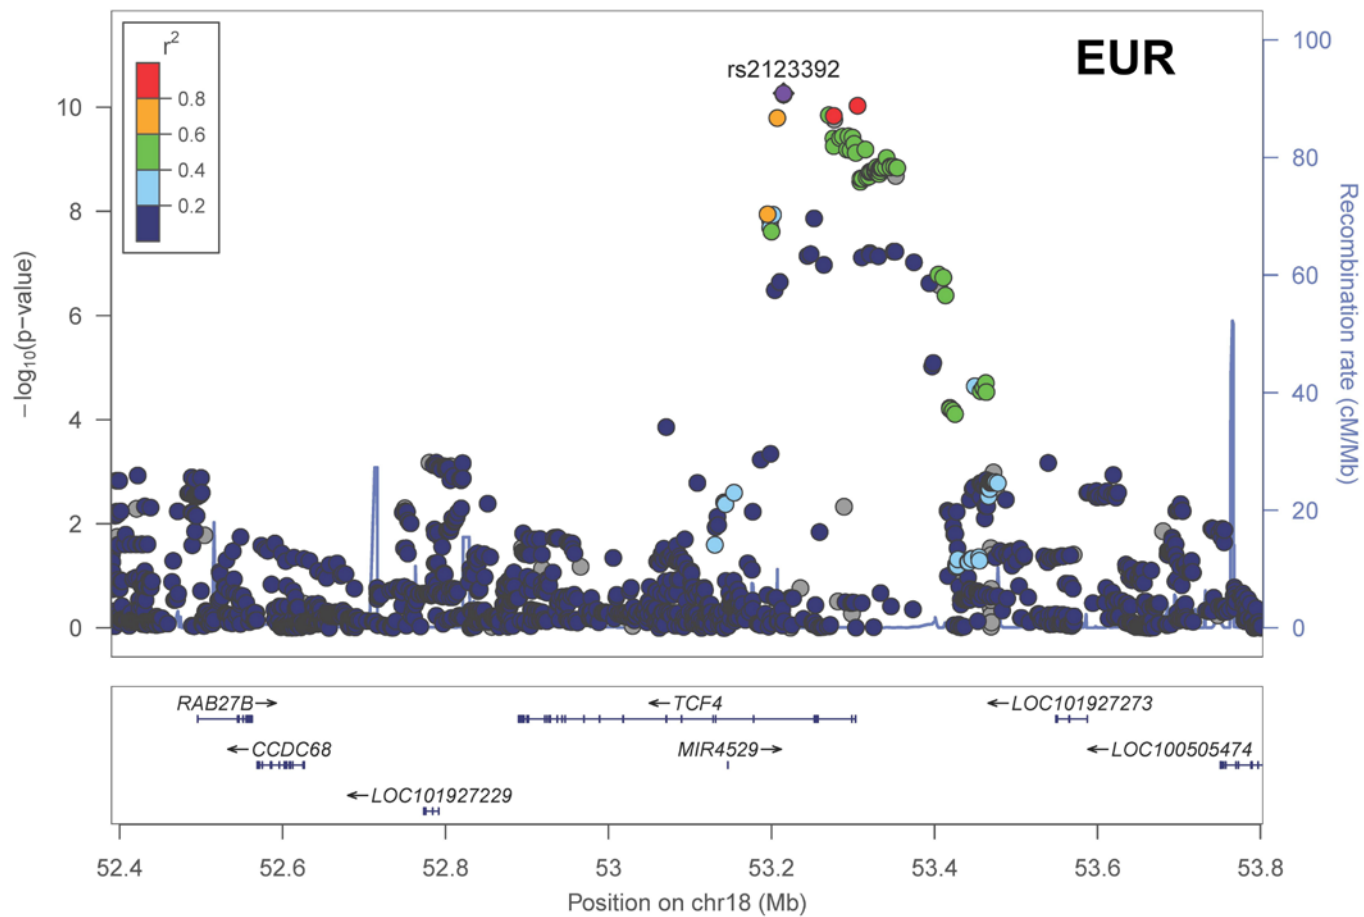

Plotted SNPs

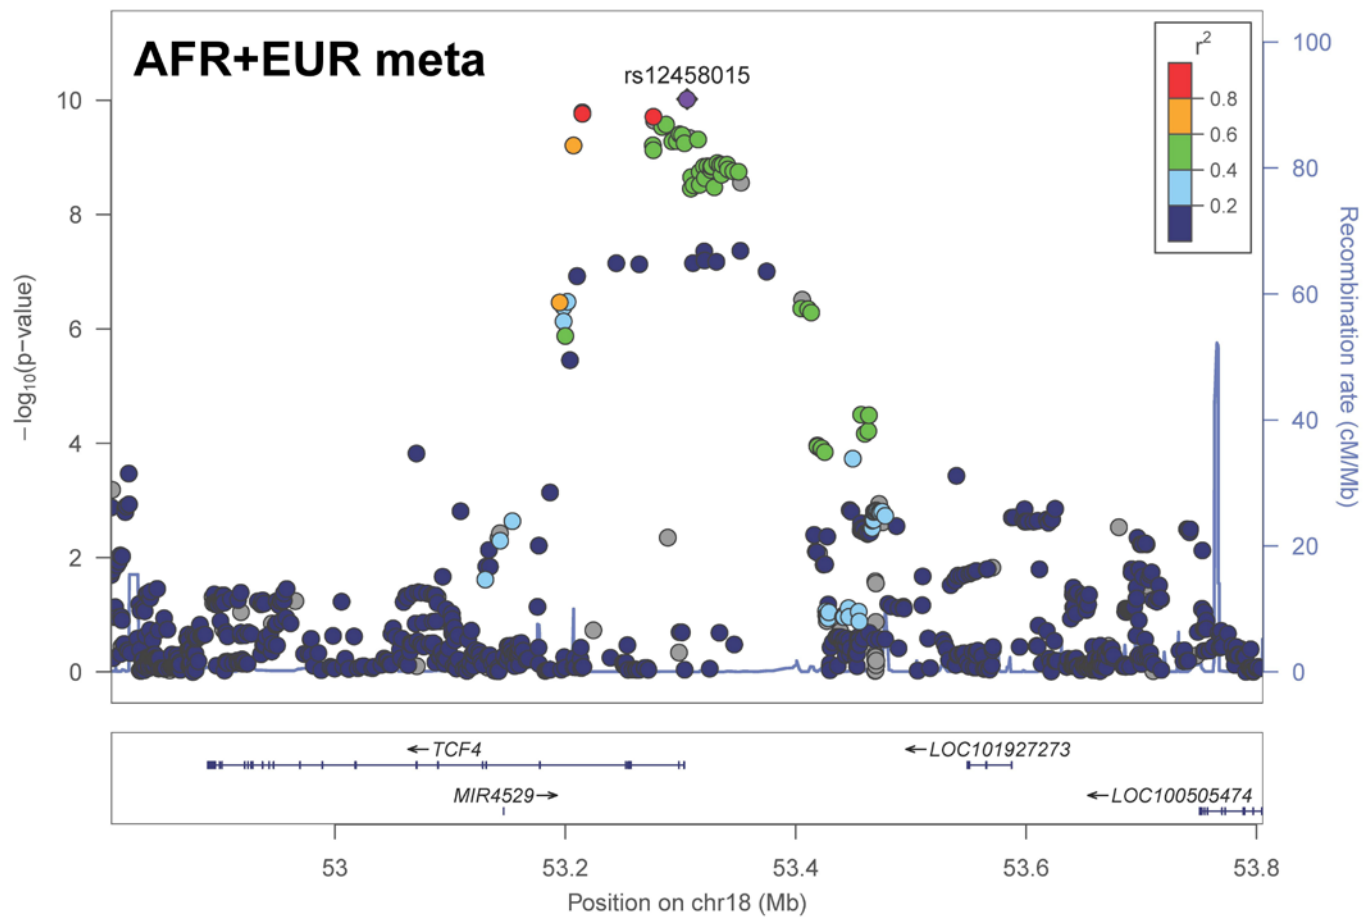

### Supplementary Figure 3

Regional Manhattan plots for significant regions

Regional Manhattan plots for significant regions with respect to EUR and AFR participants (N=146,660 and N=19,983, respectively), and trans-ancestry meta-analyses based on these two samples. Negative logarithm of the association two-sided p value (from a linear regression model) for each variant tested is reported on the y-axis. The hg19/1000 Genomes November 2014 panels were used (EUR for European-American and trans-ancestry plots; AFR for African-American plots).

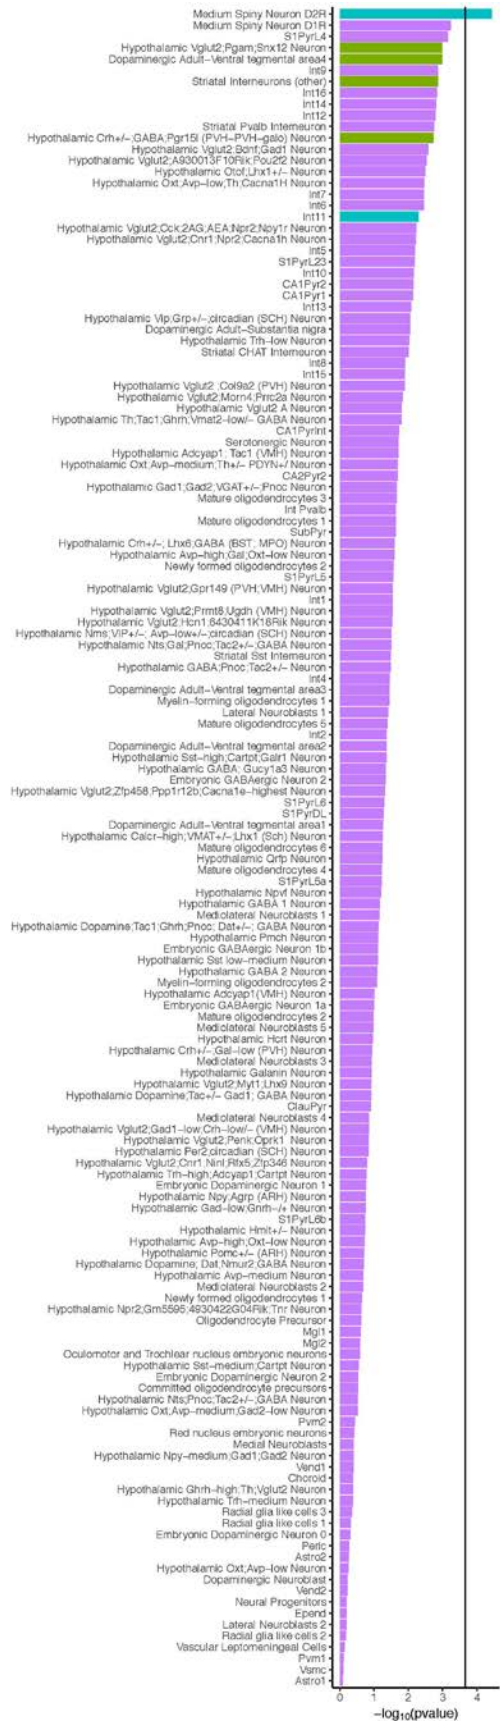

Significant

- Both
- MAGMA
- LDSC
- None

#### Supplementary Figure 4

Enrichment analysis between mouse brain cell type specific expression and PTSD re-experiencing genetic associations

Enrichment analysis between mouse brain cell type specific expression (narrowly defined) and PTSD re-experiencing genetic associations obtained from the EUR sample (N=146,660). Each bar represents negative logarithm of the enrichment p value for each cell type tested obtained two different statistical methods (LDSC and MAGMA, see details in the method section). The black bar represents the Bonferroni threshold ( $0.05/(53+24+149)$ ).

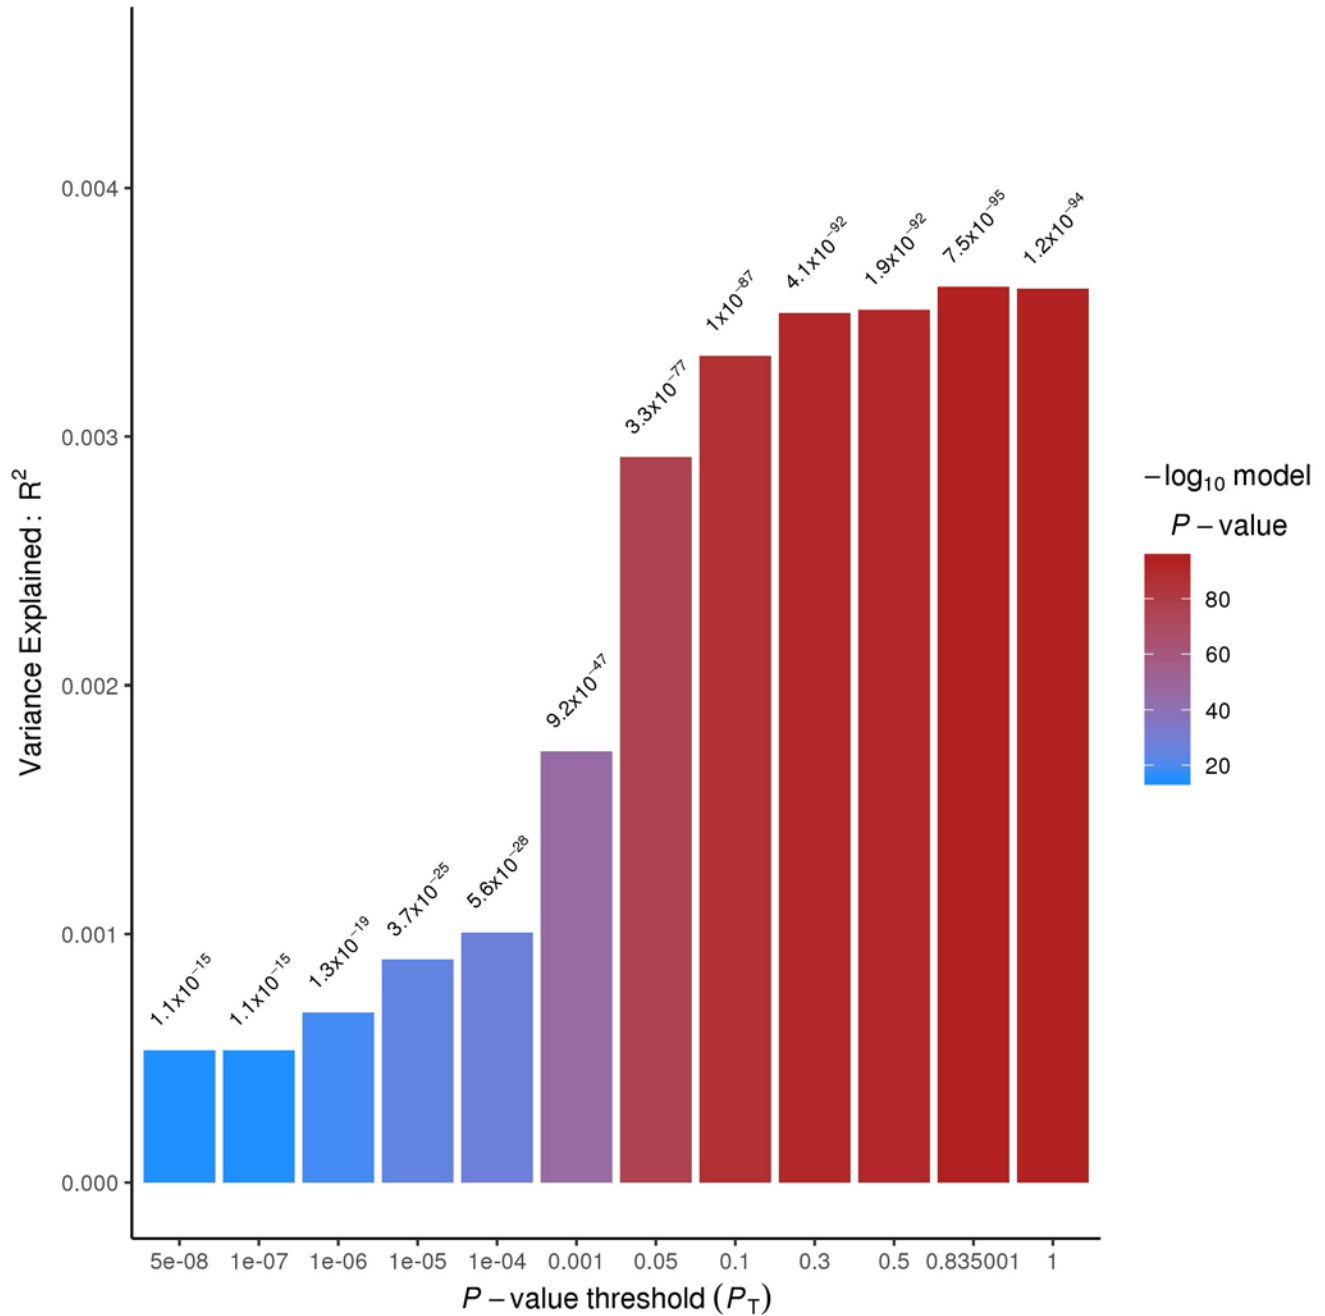

**Supplementary Figure 5**

Reexperiencing PRS derived from MVP European-ancestry sample (N=146,660) with respect to Reexperiencing item in UKB cohort (N=117,900).

Phenotypic variance explained ( $R^2$ ) by each PRS is reported on the y-axis. Two-sided p values obtained with respect to each PRS are reported above the bar. Further details are reported in the methods section.

Proxies for rs1724402 in EUR

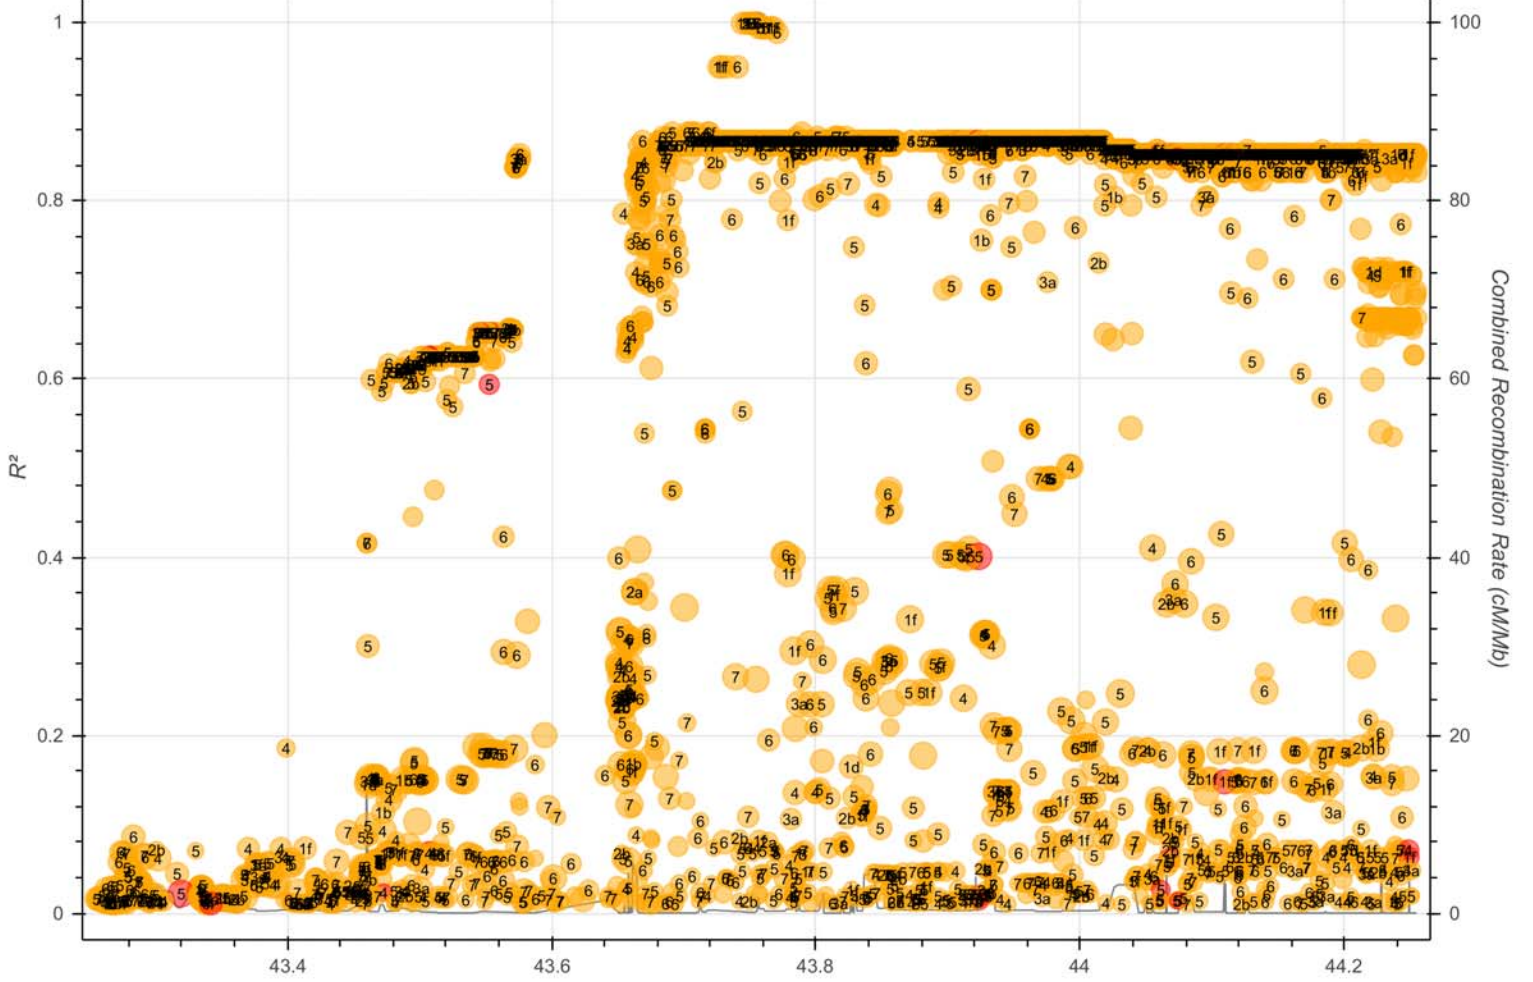

## Supplementary Figure 6

LD structure in European-American and African-American populations

LD structure in European-American and African-American populations considering the *CRHR1* genomewide significant variant in the trans-ancestry meta-analysis



Supplemental Tables and Note

| <b>Page</b>          | <b>Table or Figure</b> |                                                                                                 |
|----------------------|------------------------|-------------------------------------------------------------------------------------------------|
| 2                    | Table S1               | Items in re-experiencing symptom cluster analysis and their distributions.                      |
| 3                    | Table S2               | Extended demographic information                                                                |
| Separate Spreadsheet | Table S3               | Top 10,000 variants in EAs (LD pruned)                                                          |
| Separate Spreadsheet | Table S4               | Top 10,000 variants in AAs (LD pruned)                                                          |
| 7                    | Table S5               | Top markers in meta-analyzed EA and AA MVP samples and in UKB cohort.                           |
| 8                    | Table S6               | eQTLs tested with respect to the GWS variants identified in the EUR and trans-ancestry analysis |
| 17                   | Table S7               | Gene-based associations                                                                         |
| 18                   | Table S8               | Genetic Correlation between REX and 1,779 phenotypic traits from UK Biobank and LDhub.          |
| 47                   | Table S9a              | Pathway analysis                                                                                |
| 49                   | Table S9b              | Ingenuity IPA Top Canonical Pathways                                                            |
| 50                   |                        | Supplemental Note                                                                               |

## SUPPLEMENTAL TABLES

**Table S1. Items in re-experiencing symptom cluster analysis and their distributions.**

Five responses make up the cluster for re-experiencing.

Each item is scored from 1-5 based on how much these problems have bothered participants in the past month: 1-Not at all, 2-A little bit, 3-Moderately, 4-Quite a bit, 5-Extremely.

| <b>Response</b>           | <b>Statistic</b> | <b>AA</b> | <b>EA</b> |
|---------------------------|------------------|-----------|-----------|
| <b>MEM<sup>1</sup></b>    | Range            | 1-5       | 1-5       |
|                           | Mean             | 2.35      | 1.92      |
|                           | SD               | 1.29      | 1.11      |
| <b>DREAM<sup>2</sup></b>  | Range            | 1-5       | 1-5       |
|                           | Mean             | 2.17      | 1.71      |
|                           | SD               | 1.28      | 1.04      |
| <b>RELIVE<sup>3</sup></b> | Range            | 1-5       | 1-5       |
|                           | Mean             | 2         | 1.51      |
|                           | SD               | 1.23      | 0.91      |
| <b>UPSET<sup>4</sup></b>  | Range            | 1-5       | 1-5       |
|                           | Mean             | 2.23      | 1.73      |
|                           | SD               | 1.3       | 1.05      |
| <b>RCTN<sup>5</sup></b>   | Range            | 1-5       | 1-5       |
|                           | Mean             | 2         | 1.55      |
|                           | SD               | 1.25      | 0.96      |

1. MEM - Repeated, disturbing memories;
2. DREAM - Repeated, disturbing dreams;
3. RELIVE - Acting/feeling experience happening again;
4. UPSET - Feeling upset when reminded; and
5. RCTN - Having physical reactions to reminders.

**Table S2: Extended demographic information**

| <b>European-Americans</b>                                             |                |
|-----------------------------------------------------------------------|----------------|
| <b>Age</b>                                                            |                |
| 18-29                                                                 | 1007 (0.7)     |
| 30-39                                                                 | 2911 (2.0)     |
| 40-49                                                                 | 6890 (4.7)     |
| 50-59                                                                 | 18581 (12.7)   |
| 60-69                                                                 | 64167 (43.8)   |
| 70-79                                                                 | 33094 (22.6)   |
| 80+                                                                   | 19882 (13.6)   |
| missing                                                               | 128 (0.1)      |
| total for EA                                                          | 146660 (100.0) |
| mean (SD)                                                             | 66.6 (11.5)    |
| median                                                                | 67             |
| <b>Sex</b>                                                            |                |
| Male                                                                  | 136785 (93.3)  |
| Female                                                                | 9747 (6.6)     |
| missing                                                               | 128 (0.1)      |
| <b>Ethnicity</b>                                                      |                |
| HISPANIC OR LATINO                                                    | 1570 (1.1)     |
| NOT HISPANIC OR LATINO                                                | 143875 (98.1)  |
| UNKNOWN                                                               | 1086 (0.7)     |
| missing                                                               | 129 (0.1)      |
| <b>Marital Status</b>                                                 |                |
| Married                                                               | 84307 (57.5)   |
| Divorced                                                              | 23922 (16.3)   |
| Civil commitment                                                      | 579 (0.4)      |
| Never married                                                         | 9155 (6.2)     |
| Widowed                                                               | 9973 (6.8)     |
| Separated                                                             | 1908 (1.3)     |
| Cohabiting                                                            | 3294 (2.2)     |
| missing                                                               | 13522 (9.2)    |
| <b>Military Branch</b>                                                |                |
| Army                                                                  | 56044 (38.2)   |
| Navy                                                                  | 28796 (19.6)   |
| Air Force                                                             | 22531 (15.4)   |
| Marine Corps                                                          | 12306 (8.4)    |
| other                                                                 | 1998 (1.4)     |
| multiple                                                              | 11779 (8.0)    |
| missing                                                               | 15204 (10.4)   |
| <b>Service era</b>                                                    |                |
| Served in the military September 2001 or later                        | 2145 (1.5)     |
| Served in the military August 1990 to August 2001 (includes Gulf War) | 4470 (3.0)     |
| Served in the military May 1975 to July 1990                          | 9670 (6.6)     |
| Served in the military August 1964 to April 1975 (Vietnam era)        | 60941 (41.6)   |
| Served in the military February 1955 to July 1964                     | 13697 (9.3)    |
| Served in the military July 1950 to January 1955 (Korean War)         | 11224 (7.7)    |
| Served in the military January 1947 to June 1950                      | 479 (0.3)      |
| Served in the military December 1941 to December 1946 (WWII)          | 6314 (4.3)     |
| Served in the military November 1941 or earlier                       | 115 (0.1)      |

|                     |                       |
|---------------------|-----------------------|
| Multiple Services   | 37419 (25.5)          |
| Missing Services    | 186 (0.1)             |
|                     |                       |
| <b>total for EA</b> | <b>146660 (100.0)</b> |

| <b>African-Americans</b>                                              |               |
|-----------------------------------------------------------------------|---------------|
| <b>Age</b>                                                            |               |
| 18-29                                                                 | 106 (0.5)     |
| 30-39                                                                 | 634 (3.2)     |
| 40-49                                                                 | 2080 (10.4)   |
| 50-59                                                                 | 6119 (30.6)   |
| 60-69                                                                 | 7801 (39.0)   |
| 70-79                                                                 | 2447 (12.2)   |
| 80+                                                                   | 787 (3.9)     |
| missing                                                               | 9 (0.0)       |
| total for AA                                                          | 19983 (100.0) |
| mean (SD)                                                             | 60.2 (10.7)   |
| median                                                                | 61            |
| <b>Sex</b>                                                            |               |
| Male                                                                  | 17280 (86.5)  |
| Female                                                                | 2692 (13.5)   |
| missing                                                               | 11 (0.1)      |
| <b>Ethnicity</b>                                                      |               |
| HISPANIC OR LATINO                                                    | 263 (1.3)     |
| NOT HISPANIC OR LATINO                                                | 19459 (97.4)  |
| UNKNOWN                                                               | 252 (1.3)     |
| missing                                                               | 9 (0.0)       |
| <b>Marital Status</b>                                                 |               |
| Married                                                               | 7444 (37.3)   |
| Divorced                                                              | 4190 (21.0)   |
| Civil commitment                                                      | 97 (0.5)      |
| Never married                                                         | 2141 (10.7)   |
| Widowed                                                               | 1000 (5.0)    |
| Separated                                                             | 1059 (5.3)    |
| Cohabiting                                                            | 275 (1.4)     |
| missing                                                               | 3777 (18.9)   |
| <b>Military Branch</b>                                                |               |
| Army                                                                  | 8797 (44.0)   |
| Navy                                                                  | 1937 (9.7)    |
| Air Force                                                             | 2400 (12.0)   |
| Marine Corps                                                          | 1503 (7.5)    |
| other                                                                 | 159 (0.8)     |
| multiple                                                              | 1435 (7.2)    |
| missing                                                               | 3911 (19.6)   |
| <b>Service era</b>                                                    |               |
| Served in the military September 2001 or later                        | 445 (2.2)     |
| Served in the military August 1990 to August 2001 (includes Gulf War) | 1862 (9.3)    |
| Served in the military May 1975 to July 1990                          | 3599 (18.0)   |
| Served in the military August 1964 to April 1975 (Vietnam era)        | 7682 (38.4)   |
| Served in the military February 1955 to July 1964                     | 801 (4.0)     |
| Served in the military July 1950 to January 1955 (Korean War)         | 619 (3.1)     |
| Served in the military January 1947 to June 1950                      | 24 (0.1)      |
| Served in the military December 1941 to December 1946 (WWII)          | 144 (0.7)     |
| Served in the military November 1941 or earlier                       | 7 (0.0)       |
| Multiple Services                                                     | 4760 (23.8)   |

|                     |                      |
|---------------------|----------------------|
| Missing Services    | 40 (0.2)             |
|                     |                      |
| <b>total for AA</b> | <b>19983 (100.0)</b> |

**Table S5: Top markers in meta-analyzed EA and AA MVP samples and the replication in UKB cohort.**

| rsID       | CHR | BP       | Closest Gene (location)     | effect allele | other allele | MVP REX     |           |          | UKB REX     |           |                 |
|------------|-----|----------|-----------------------------|---------------|--------------|-------------|-----------|----------|-------------|-----------|-----------------|
|            |     |          |                             |               |              | <i>Beta</i> | <i>SE</i> | <i>P</i> | <i>Beta</i> | <i>SE</i> | <i>P</i>        |
| rs7540134  | 1   | 74077588 | <i>LINC02238</i> (upstream) | C             | T            | -0.0935     | 0.015882  | 3.93E-09 | -0.0003     | 0.003     | 0.926           |
| rs2681780  | 3   | 49897830 | <i>CAMVK</i> (intron)       | T             | C            | 0.1087      | 0.015928  | 8.82E-12 | 0.007       | 0.003     | <b>0.032</b>    |
| rs12649023 | 4   | 88259008 | <i>HSD17B11</i> (intron)    | A             | G            | -0.1258     | 0.022135  | 1.32E-08 | -0.011      | 0.004     | <b>0.009</b>    |
| rs3800872  | 7   | 2110272  | <i>MAD1L1</i> (intron)      | G             | C            | -0.1157     | 0.019754  | 4.72E-09 | -0.001      | 0.004     | 0.695           |
| rs1724409  | 17  | 43740565 | <i>CRHR1</i> (intron)       | T             | G            | -0.1182     | 0.017851  | 3.55E-11 | -0.011      | 0.004     | <b>0.002</b>    |
| rs12458015 | 18  | 53305735 | <i>TCF4</i> (intron)        | C             | T            | 0.1103      | 0.017038  | 9.60E-11 | 0.013       | 0.003     | <b>9.91E-05</b> |

Table S6

eQTLs tested with respect to the GWS variants identified in the EUR and trans-ancestry analysis

| GTEx_gene_id       | GTEx_variant_id     | rsid_Gene             | Meta-analysis | Protein-Coding | tss_distance | Tissue                | ma_samples | ma_count | maf   | slope  | slope_se | P value  | FDR Q    |
|--------------------|---------------------|-----------------------|---------------|----------------|--------------|-----------------------|------------|----------|-------|--------|----------|----------|----------|
| ENSG00000176349.7  | 7_2086814_T_C_b37   | rs10235664_AC104129.1 | EUR           | N              | 208592       | NUCLEUS.ACCUMBENS     | 60         | 76       | 0.292 | -0.290 | 0.100    | 0.004    | 0.042    |
| ENSG00000164850.10 | 7_2086814_T_C_b37   | rs10235664_GPER1      | EUR           | Y              | 964970       | HYPOTHALAMUS          | 50         | 65       | 0.301 | -0.239 | 0.082    | 0.005    | 0.044    |
| ENSG00000122687.13 | 7_2086814_T_C_b37   | rs10235664_MRM2       | EUR           | Y              | -195026      | CEREBELLAR.HEMISPHERE | 59         | 75       | 0.300 | -0.267 | 0.063    | 4.68E-05 | 6.30E-04 |
| ENSG00000122687.13 | 7_2086814_T_C_b37   | rs10235664_MRM2       | EUR           | Y              | -195026      | CAUDATE               | 70         | 87       | 0.302 | -0.286 | 0.077    | 3.19E-04 | 0.004    |
| ENSG00000122687.13 | 7_2086814_T_C_b37   | rs10235664_MRM2       | EUR           | Y              | -195026      | CEREBELLUM            | 69         | 86       | 0.279 | -0.271 | 0.076    | 5.45E-04 | 0.007    |
| ENSG00000122687.13 | 7_2086814_T_C_b37   | rs10235664_MRM2       | EUR           | Y              | -195026      | CORTEX                | 64         | 79       | 0.290 | -0.301 | 0.086    | 6.81E-04 | 0.008    |
| ENSG00000122687.13 | 7_2086814_T_C_b37   | rs10235664_MRM2       | EUR           | Y              | -195026      | NUCLEUS.ACCUMBENS     | 60         | 76       | 0.292 | -0.338 | 0.099    | 9.24E-04 | 0.011    |
| ENSG00000122687.13 | 7_2086814_T_C_b37   | rs10235664_MRM2       | EUR           | Y              | -195026      | HIPPOCAMPUS           | 54         | 68       | 0.306 | -0.292 | 0.086    | 0.001    | 0.012    |
| ENSG00000122687.13 | 7_2086814_T_C_b37   | rs10235664_MRM2       | EUR           | Y              | -195026      | AMYGDALA              | 41         | 49       | 0.278 | -0.354 | 0.116    | 0.003    | 0.033    |
| ENSG00000122687.13 | 7_2086814_T_C_b37   | rs10235664_MRM2       | EUR           | Y              | -195026      | CINGULATE             | 51         | 62       | 0.284 | -0.244 | 0.082    | 0.004    | 0.039    |
| ENSG00000267325.1  | 18_53214865_T_C_b37 | rs2123392_LINC01415   | EUR           | N              | -234087      | NUCLEUS.ACCUMBENS     | 78         | 92       | 0.354 | -0.256 | 0.081    | 0.002    | 0.022    |
| ENSG00000196628.9  | 18_53214865_T_C_b37 | rs2123392_TCF4        | EUR           | N              | -117153      | CINGULATE             | 62         | 74       | 0.339 | -0.261 | 0.090    | 0.005    | 0.046    |
| ENSG00000261575.2  | 17_44257783_A_G_b37 | rs2532252_AC005829.1  | EUR           | N              | -86620       | CEREBELLAR.HEMISPHERE | 57         | 65       | 0.260 | 1.192  | 0.074    | 4.66E-30 | 3.82E-27 |
| ENSG00000261575.2  | 17_44257783_A_G_b37 | rs2532252_AC005829.1  | EUR           | N              | -86620       | CEREBELLUM            | 71         | 85       | 0.278 | 1.045  | 0.074    | 3.36E-27 | 1.38E-24 |
| ENSG00000261575.2  | 17_44257783_A_G_b37 | rs2532252_AC005829.1  | EUR           | N              | -86620       | CAUDATE               | 64         | 74       | 0.259 | 0.902  | 0.107    | 7.50E-14 | 2.19E-12 |
| ENSG00000261575.2  | 17_44257783_A_G_b37 | rs2532252_AC005829.1  | EUR           | N              | -86620       | NUCLEUS.ACCUMBENS     | 63         | 74       | 0.287 | 0.836  | 0.098    | 1.07E-13 | 3.09E-12 |
| ENSG00000261575.2  | 17_44257783_A_G_b37 | rs2532252_AC005829.1  | EUR           | N              | -86620       | CORTEX                | 63         | 72       | 0.269 | 0.828  | 0.112    | 2.92E-11 | 6.21E-10 |
| ENSG00000261575.2  | 17_44257783_A_G_b37 | rs2532252_AC005829.1  | EUR           | N              | -86620       | PUTAMEN               | 50         | 62       | 0.279 | 0.861  | 0.120    | 2.10E-10 | 4.11E-09 |
| ENSG00000261575.2  | 17_44257783_A_G_b37 | rs2532252_AC005829.1  | EUR           | N              | -86620       | CINGULATE             | 45         | 53       | 0.245 | 0.757  | 0.109    | 7.54E-10 | 1.43E-08 |
| ENSG00000261575.2  | 17_44257783_A_G_b37 | rs2532252_AC005829.1  | EUR           | N              | -86620       | FRONTAL.CORTEX        | 55         | 64       | 0.274 | 0.662  | 0.116    | 1.20E-07 | 2.01E-06 |
| ENSG00000261575.2  | 17_44257783_A_G_b37 | rs2532252_AC005829.1  | EUR           | N              | -86620       | HYPOTHALAMUS          | 50         | 57       | 0.266 | 0.712  | 0.128    | 2.74E-07 | 4.46E-06 |
| ENSG00000261575.2  | 17_44257783_A_G_b37 | rs2532252_AC005829.1  | EUR           | N              | -86620       | AMYGDALA              | 43         | 52       | 0.295 | 0.771  | 0.135    | 2.81E-07 | 4.56E-06 |
| ENSG00000261575.2  | 17_44257783_A_G_b37 | rs2532252_AC005829.1  | EUR           | N              | -86620       | SPINAL.CORD           | 36         | 43       | 0.259 | 0.783  | 0.160    | 7.83E-06 | 1.13E-04 |
| ENSG00000261575.2  | 17_44257783_A_G_b37 | rs2532252_AC005829.1  | EUR           | N              | -86620       | HIPPOCAMPUS           | 55         | 62       | 0.279 | 0.482  | 0.134    | 5.44E-04 | 0.007    |
| ENSG00000261575.2  | 17_44257783_A_G_b37 | rs2532252_AC005829.1  | EUR           | N              | -86620       | SUBSTANTIA.NIGRA      | 32         | 35       | 0.219 | 0.623  | 0.183    | 0.001    | 0.014    |
| ENSG00000262539.1  | 17_44257783_A_G_b37 | rs2532252_AC005829.2  | EUR           | N              | -80189       | CEREBELLUM            | 71         | 85       | 0.278 | 1.133  | 0.081    | 6.49E-27 | 1.99E-24 |
| ENSG00000262539.1  | 17_44257783_A_G_b37 | rs2532252_AC005829.2  | EUR           | N              | -80189       | NUCLEUS.ACCUMBENS     | 63         | 74       | 0.287 | 1.150  | 0.089    | 9.47E-24 | 1.72E-21 |
| ENSG00000262539.1  | 17_44257783_A_G_b37 | rs2532252_AC005829.2  | EUR           | N              | -80189       | CORTEX                | 63         | 72       | 0.269 | 1.096  | 0.087    | 2.07E-23 | 3.51E-21 |
| ENSG00000262539.1  | 17_44257783_A_G_b37 | rs2532252_AC005829.2  | EUR           | N              | -80189       | CAUDATE               | 64         | 74       | 0.259 | 1.082  | 0.092    | 7.94E-22 | 9.52E-20 |
| ENSG00000262539.1  | 17_44257783_A_G_b37 | rs2532252_AC005829.2  | EUR           | N              | -80189       | CEREBELLAR.HEMISPHERE | 57         | 65       | 0.260 | 1.162  | 0.097    | 2.54E-21 | 2.77E-19 |
| ENSG00000262539.1  | 17_44257783_A_G_b37 | rs2532252_AC005829.2  | EUR           | N              | -80189       | PUTAMEN               | 50         | 62       | 0.279 | 1.089  | 0.091    | 2.61E-20 | 2.25E-18 |
| ENSG00000262539.1  | 17_44257783_A_G_b37 | rs2532252_AC005829.2  | EUR           | N              | -80189       | CINGULATE             | 45         | 53       | 0.245 | 1.067  | 0.098    | 7.12E-18 | 4.11E-16 |
| ENSG00000262539.1  | 17_44257783_A_G_b37 | rs2532252_AC005829.2  | EUR           | N              | -80189       | HIPPOCAMPUS           | 55         | 62       | 0.279 | 1.029  | 0.095    | 7.20E-18 | 4.11E-16 |
| ENSG00000262539.1  | 17_44257783_A_G_b37 | rs2532252_AC005829.2  | EUR           | N              | -80189       | HYPOTHALAMUS          | 50         | 57       | 0.266 | 1.042  | 0.107    | 1.48E-15 | 6.01E-14 |
| ENSG00000262539.1  | 17_44257783_A_G_b37 | rs2532252_AC005829.2  | EUR           | N              | -80189       | SPINAL.CORD           | 36         | 43       | 0.259 | 1.148  | 0.115    | 1.81E-14 | 6.09E-13 |
| ENSG00000262539.1  | 17_44257783_A_G_b37 | rs2532252_AC005829.2  | EUR           | N              | -80189       | FRONTAL.CORTEX        | 55         | 64       | 0.274 | 0.923  | 0.114    | 1.62E-12 | 4.04E-11 |
| ENSG00000262539.1  | 17_44257783_A_G_b37 | rs2532252_AC005829.2  | EUR           | N              | -80189       | AMYGDALA              | 43         | 52       | 0.295 | 0.964  | 0.121    | 2.72E-11 | 5.81E-10 |
| ENSG00000262539.1  | 17_44257783_A_G_b37 | rs2532252_AC005829.2  | EUR           | N              | -80189       | SUBSTANTIA.NIGRA      | 32         | 35       | 0.219 | 1.219  | 0.160    | 2.80E-10 | 5.42E-09 |
| ENSG00000233175.2  | 17_44257783_A_G_b37 | rs2532252_AC008105.1  | EUR           | N              | 938682       | CEREBELLUM            | 71         | 85       | 0.278 | -0.235 | 0.070    | 0.001    | 0.012    |
| ENSG00000233175.2  | 17_44257783_A_G_b37 | rs2532252_AC008105.1  | EUR           | N              | 938682       | PUTAMEN               | 50         | 62       | 0.279 | -0.255 | 0.085    | 0.004    | 0.037    |
| ENSG00000233175.2  | 17_44257783_A_G_b37 | rs2532252_AC008105.1  | EUR           | N              | 938682       | FRONTAL.CORTEX        | 55         | 64       | 0.274 | -0.329 | 0.114    | 0.005    | 0.048    |
| ENSG00000267121.1  | 17_44257783_A_G_b37 | rs2532252_AC008105.3  | EUR           | N              | 958628       | CEREBELLUM            | 71         | 85       | 0.278 | -0.485 | 0.083    | 4.36E-08 | 7.42E-07 |
| ENSG00000267121.1  | 17_44257783_A_G_b37 | rs2532252_AC008105.3  | EUR           | N              | 958628       | CEREBELLAR.HEMISPHERE | 57         | 65       | 0.260 | -0.470 | 0.104    | 1.53E-05 | 2.17E-04 |
| ENSG00000262879.1  | 17_44257783_A_G_b37 | rs2532252_AC068152.1  | EUR           | N              | 919906       | HYPOTHALAMUS          | 50         | 57       | 0.266 | 0.403  | 0.130    | 0.003    | 0.027    |
| ENSG00000131484.3  | 17_44257783_A_G_b37 | rs2532252_AC091132.1  | EUR           | N              | 677157       | CEREBELLUM            | 71         | 85       | 0.278 | -0.806 | 0.102    | 1.46E-12 | 3.68E-11 |
| ENSG00000131484.3  | 17_44257783_A_G_b37 | rs2532252_AC091132.1  | EUR           | N              | 677157       | CEREBELLAR.HEMISPHERE | 57         | 65       | 0.260 | -0.764 | 0.119    | 4.21E-09 | 7.66E-08 |
| ENSG00000236234.1  | 17_44257783_A_G_b37 | rs2532252_AC091132.2  | EUR           | N              | 727573       | CEREBELLUM            | 71         | 85       | 0.278 | -0.593 | 0.096    | 1.09E-08 | 1.93E-07 |
| ENSG00000236234.1  | 17_44257783_A_G_b37 | rs2532252_AC091132.2  | EUR           | N              | 727573       | CEREBELLAR.HEMISPHERE | 57         | 65       | 0.260 | -0.552 | 0.113    | 3.58E-06 | 5.32E-05 |
| ENSG00000266918.1  | 17_44257783_A_G_b37 | rs2532252_AC091132.3  | EUR           | N              | 648840       | CEREBELLAR.HEMISPHERE | 57         | 65       | 0.260 | 0.737  | 0.118    | 9.21E-09 | 1.63E-07 |
| ENSG00000266918.1  | 17_44257783_A_G_b37 | rs2532252_AC091132.3  | EUR           | N              | 648840       | CEREBELLUM            | 71         | 85       | 0.278 | 0.561  | 0.105    | 5.05E-07 | 7.96E-06 |
| ENSG00000266918.1  | 17_44257783_A_G_b37 | rs2532252_AC091132.3  | EUR           | N              | 648840       | CORTEX                | 63         | 72       | 0.269 | 0.532  | 0.115    | 1.04E-05 | 1.49E-04 |
| ENSG00000267198.1  | 17_44257783_A_G_b37 | rs2532252_AC091132.4  | EUR           | N              | 634613       | CEREBELLUM            | 71         | 85       | 0.278 | -0.400 | 0.114    | 6.57E-04 | 0.008    |
| ENSG00000159314.7  | 17_44257783_A_G_b37 | rs2532252_ARHGAP27    | EUR           | Y              | 745996       | NUCLEUS.ACCUMBENS     | 63         | 74       | 0.287 | 0.427  | 0.078    | 3.02E-07 | 4.87E-06 |
| ENSG00000159314.7  | 17_44257783_A_G_b37 | rs2532252_ARHGAP27    | EUR           | Y              | 745996       | CAUDATE               | 64         | 74       | 0.259 | 0.227  | 0.053    | 3.86E-05 | 5.23E-04 |
| ENSG00000159314.7  | 17_44257783_A_G_b37 | rs2532252_ARHGAP27    | EUR           | Y              | 745996       | FRONTAL.CORTEX        | 55         | 64       | 0.274 | 0.319  | 0.094    | 0.001    | 0.012    |
| ENSG00000159314.7  | 17_44257783_A_G_b37 | rs2532252_ARHGAP27    | EUR           | Y              | 745996       | CORTEX                | 63         | 72       | 0.269 | 0.289  | 0.094    | 0.003    | 0.028    |
| ENSG00000185829.11 | 17_44257783_A_G_b37 | rs2532252_ARL17A      | EUR           | Y              | -399305      | CEREBELLUM            | 71         | 85       | 0.278 | 1.033  | 0.081    | 8.39E-24 | 1.61E-21 |
| ENSG00000185829.11 | 17_44257783_A_G_b37 | rs2532252_ARL17A      | EUR           | Y              | -399305      | CEREBELLAR.HEMISPHERE | 57         | 65       | 0.260 | 1.143  | 0.090    | 7.80E-23 | 1.13E-20 |
| ENSG00000185829.11 | 17_44257783_A_G_b37 | rs2532252_ARL17A      | EUR           | Y              | -399305      | CORTEX                | 63         | 72       | 0.269 | 1.083  | 0.094    | 9.88E-21 | 9.71E-19 |
| ENSG00000185829.11 | 17_44257783_A_G_b37 | rs2532252_ARL17A      | EUR           | Y              | -399305      | FRONTAL.CORTEX        | 55         | 64       | 0.274 | 1.048  | 0.112    | 3.37E-15 | 1.29E-13 |



|                    |                     |                      |     |   |         |                       |    |    |       |        |       |          |          |
|--------------------|---------------------|----------------------|-----|---|---------|-----------------------|----|----|-------|--------|-------|----------|----------|
| ENSG00000185829.11 | 17_44257783_A_G_b37 | rs2532252_ARL17A     | EUR | Y | -399305 | NUCLEUS.ACCUMBENS     | 63 | 74 | 0.287 | 0.933  | 0.107 | 4.45E-14 | 1.34E-12 |
| ENSG00000185829.11 | 17_44257783_A_G_b37 | rs2532252_ARL17A     | EUR | Y | -399305 | HYPOTHALAMUS          | 50 | 57 | 0.266 | 1.045  | 0.125 | 9.17E-13 | 2.35E-11 |
| ENSG00000185829.11 | 17_44257783_A_G_b37 | rs2532252_ARL17A     | EUR | Y | -399305 | PUTAMEN               | 50 | 62 | 0.279 | 0.829  | 0.105 | 7.63E-12 | 1.74E-10 |
| ENSG00000185829.11 | 17_44257783_A_G_b37 | rs2532252_ARL17A     | EUR | Y | -399305 | CINGULATE             | 45 | 53 | 0.245 | 0.890  | 0.119 | 5.95E-11 | 1.22E-09 |
| ENSG00000185829.11 | 17_44257783_A_G_b37 | rs2532252_ARL17A     | EUR | Y | -399305 | CAUDATE               | 64 | 74 | 0.259 | 0.712  | 0.106 | 5.51E-10 | 1.05E-08 |
| ENSG00000185829.11 | 17_44257783_A_G_b37 | rs2532252_ARL17A     | EUR | Y | -399305 | AMYGDALA              | 43 | 52 | 0.295 | 0.876  | 0.146 | 8.62E-08 | 1.45E-06 |
| ENSG00000185829.11 | 17_44257783_A_G_b37 | rs2532252_ARL17A     | EUR | Y | -399305 | HIPPOCAMPUS           | 55 | 62 | 0.279 | 0.640  | 0.118 | 4.68E-07 | 7.40E-06 |
| ENSG00000185829.11 | 17_44257783_A_G_b37 | rs2532252_ARL17A     | EUR | Y | -399305 | SPINAL.CORD           | 36 | 43 | 0.259 | 0.532  | 0.150 | 7.31E-04 | 0.008    |
| ENSG00000120088.10 | 17_44257783_A_G_b37 | rs2532252_CRHR1      | EUR | Y | 558516  | HIPPOCAMPUS           | 55 | 62 | 0.279 | -0.270 | 0.075 | 4.94E-04 | 0.006    |
| ENSG00000120088.10 | 17_44257783_A_G_b37 | rs2532252_CRHR1      | EUR | Y | 558516  | PUTAMEN               | 50 | 62 | 0.279 | -0.332 | 0.098 | 0.001    | 0.012    |
| ENSG00000120088.10 | 17_44257783_A_G_b37 | rs2532252_CRHR1      | EUR | Y | 558516  | FRONTAL.CORTEX        | 55 | 64 | 0.274 | 0.173  | 0.054 | 0.002    | 0.020    |
| ENSG00000264070.1  | 17_44257783_A_G_b37 | rs2532252_DND1P1     | EUR | N | 594546  | CORTEX                | 63 | 72 | 0.269 | 1.079  | 0.096 | 2.58E-20 | 2.25E-18 |
| ENSG00000264070.1  | 17_44257783_A_G_b37 | rs2532252_DND1P1     | EUR | N | 594546  | PUTAMEN               | 50 | 62 | 0.279 | 0.977  | 0.097 | 2.43E-16 | 1.12E-14 |
| ENSG00000264070.1  | 17_44257783_A_G_b37 | rs2532252_DND1P1     | EUR | N | 594546  | NUCLEUS.ACCUMBENS     | 63 | 74 | 0.287 | 0.956  | 0.107 | 1.09E-14 | 3.85E-13 |
| ENSG00000264070.1  | 17_44257783_A_G_b37 | rs2532252_DND1P1     | EUR | N | 594546  | HIPPOCAMPUS           | 55 | 62 | 0.279 | 0.938  | 0.103 | 2.70E-14 | 8.67E-13 |
| ENSG00000264070.1  | 17_44257783_A_G_b37 | rs2532252_DND1P1     | EUR | N | 594546  | CAUDATE               | 64 | 74 | 0.259 | 0.835  | 0.100 | 1.20E-13 | 3.43E-12 |
| ENSG00000264070.1  | 17_44257783_A_G_b37 | rs2532252_DND1P1     | EUR | N | 594546  | CINGULATE             | 45 | 53 | 0.245 | 0.932  | 0.120 | 1.31E-11 | 2.91E-10 |
| ENSG00000264070.1  | 17_44257783_A_G_b37 | rs2532252_DND1P1     | EUR | N | 594546  | HYPOTHALAMUS          | 50 | 57 | 0.266 | 0.917  | 0.118 | 1.35E-11 | 2.98E-10 |
| ENSG00000264070.1  | 17_44257783_A_G_b37 | rs2532252_DND1P1     | EUR | N | 594546  | SPINAL.CORD           | 36 | 43 | 0.259 | 1.016  | 0.124 | 2.16E-11 | 4.68E-10 |
| ENSG00000264070.1  | 17_44257783_A_G_b37 | rs2532252_DND1P1     | EUR | N | 594546  | CEREBELLUM            | 71 | 85 | 0.278 | 0.594  | 0.082 | 6.09E-11 | 1.25E-09 |
| ENSG00000264070.1  | 17_44257783_A_G_b37 | rs2532252_DND1P1     | EUR | N | 594546  | FRONTAL.CORTEX        | 55 | 64 | 0.274 | 0.827  | 0.116 | 2.08E-10 | 4.09E-09 |
| ENSG00000264070.1  | 17_44257783_A_G_b37 | rs2532252_DND1P1     | EUR | N | 594546  | AMYGDALA              | 43 | 52 | 0.295 | 0.683  | 0.115 | 1.07E-07 | 1.79E-06 |
| ENSG00000264070.1  | 17_44257783_A_G_b37 | rs2532252_DND1P1     | EUR | N | 594546  | CEREBELLAR.HEMISPHERE | 57 | 65 | 0.260 | 0.607  | 0.110 | 2.51E-07 | 4.13E-06 |
| ENSG00000264070.1  | 17_44257783_A_G_b37 | rs2532252_DND1P1     | EUR | N | 594546  | SUBSTANTIA.NIGRA      | 32 | 35 | 0.219 | 0.991  | 0.181 | 9.58E-07 | 1.49E-05 |
| ENSG00000232300.1  | 17_44257783_A_G_b37 | rs2532252_FAM215B    | EUR | N | -382378 | CEREBELLUM            | 71 | 85 | 0.278 | 0.744  | 0.093 | 1.13E-12 | 2.86E-11 |
| ENSG00000232300.1  | 17_44257783_A_G_b37 | rs2532252_FAM215B    | EUR | N | -382378 | CEREBELLAR.HEMISPHERE | 57 | 65 | 0.260 | 0.831  | 0.121 | 4.70E-10 | 9.02E-09 |
| ENSG00000232300.1  | 17_44257783_A_G_b37 | rs2532252_FAM215B    | EUR | N | -382378 | NUCLEUS.ACCUMBENS     | 63 | 74 | 0.287 | 0.683  | 0.124 | 2.73E-07 | 4.46E-06 |
| ENSG00000232300.1  | 17_44257783_A_G_b37 | rs2532252_FAM215B    | EUR | N | -382378 | HYPOTHALAMUS          | 50 | 57 | 0.266 | 0.433  | 0.151 | 0.005    | 0.048    |
| ENSG00000184922.9  | 17_44257783_A_G_b37 | rs2532252_FMNL1      | EUR | Y | 958193  | CEREBELLUM            | 71 | 85 | 0.278 | -0.659 | 0.071 | 1.13E-15 | 4.71E-14 |
| ENSG00000184922.9  | 17_44257783_A_G_b37 | rs2532252_FMNL1      | EUR | Y | 958193  | CEREBELLAR.HEMISPHERE | 57 | 65 | 0.260 | -0.671 | 0.082 | 6.73E-13 | 1.76E-11 |
| ENSG00000184922.9  | 17_44257783_A_G_b37 | rs2532252_FMNL1      | EUR | Y | 958193  | FRONTAL.CORTEX        | 55 | 64 | 0.274 | 0.205  | 0.063 | 0.001    | 0.016    |
| ENSG00000120071.8  | 17_44257783_A_G_b37 | rs2532252_KANSL1     | EUR | Y | -44950  | CEREBELLUM            | 71 | 85 | 0.278 | 0.348  | 0.088 | 1.23E-04 | 0.002    |
| ENSG00000120071.8  | 17_44257783_A_G_b37 | rs2532252_KANSL1     | EUR | Y | -44950  | CEREBELLAR.HEMISPHERE | 57 | 65 | 0.260 | 0.320  | 0.093 | 8.31E-04 | 0.010    |
| ENSG00000120071.8  | 17_44257783_A_G_b37 | rs2532252_KANSL1     | EUR | Y | -44950  | CAUDATE               | 64 | 74 | 0.259 | 0.262  | 0.079 | 0.001    | 0.014    |
| ENSG00000120071.8  | 17_44257783_A_G_b37 | rs2532252_KANSL1     | EUR | Y | -44950  | CORTEX                | 63 | 72 | 0.269 | 0.299  | 0.101 | 0.004    | 0.039    |
| ENSG00000214401.4  | 17_44257783_A_G_b37 | rs2532252_KANSL1-AS1 | EUR | N | -13159  | CEREBELLUM            | 71 | 85 | 0.278 | 1.098  | 0.076 | 6.39E-28 | 2.86E-25 |
| ENSG00000214401.4  | 17_44257783_A_G_b37 | rs2532252_KANSL1-AS1 | EUR | N | -13159  | CORTEX                | 63 | 72 | 0.269 | 1.094  | 0.077 | 3.74E-27 | 1.39E-24 |
| ENSG00000214401.4  | 17_44257783_A_G_b37 | rs2532252_KANSL1-AS1 | EUR | N | -13159  | NUCLEUS.ACCUMBENS     | 63 | 74 | 0.287 | 0.991  | 0.077 | 2.24E-23 | 3.67E-21 |
| ENSG00000214401.4  | 17_44257783_A_G_b37 | rs2532252_KANSL1-AS1 | EUR | N | -13159  | CEREBELLAR.HEMISPHERE | 57 | 65 | 0.260 | 0.996  | 0.082 | 1.17E-21 | 1.34E-19 |
| ENSG00000214401.4  | 17_44257783_A_G_b37 | rs2532252_KANSL1-AS1 | EUR | N | -13159  | PUTAMEN               | 50 | 62 | 0.279 | 1.033  | 0.087 | 4.14E-20 | 3.45E-18 |
| ENSG00000214401.4  | 17_44257783_A_G_b37 | rs2532252_KANSL1-AS1 | EUR | N | -13159  | CAUDATE               | 64 | 74 | 0.259 | 0.998  | 0.092 | 1.06E-19 | 8.27E-18 |
| ENSG00000214401.4  | 17_44257783_A_G_b37 | rs2532252_KANSL1-AS1 | EUR | N | -13159  | HIPPOCAMPUS           | 55 | 62 | 0.279 | 1.069  | 0.096 | 1.77E-18 | 1.18E-16 |
| ENSG00000214401.4  | 17_44257783_A_G_b37 | rs2532252_KANSL1-AS1 | EUR | N | -13159  | HYPOTHALAMUS          | 50 | 57 | 0.266 | 1.051  | 0.101 | 8.43E-17 | 4.14E-15 |
| ENSG00000214401.4  | 17_44257783_A_G_b37 | rs2532252_KANSL1-AS1 | EUR | N | -13159  | FRONTAL.CORTEX        | 55 | 64 | 0.274 | 0.932  | 0.095 | 4.12E-16 | 1.81E-14 |
| ENSG00000214401.4  | 17_44257783_A_G_b37 | rs2532252_KANSL1-AS1 | EUR | N | -13159  | SPINAL.CORD           | 36 | 43 | 0.259 | 1.041  | 0.098 | 1.93E-15 | 7.59E-14 |
| ENSG00000214401.4  | 17_44257783_A_G_b37 | rs2532252_KANSL1-AS1 | EUR | N | -13159  | CINGULATE             | 45 | 53 | 0.245 | 0.878  | 0.092 | 4.03E-15 | 1.51E-13 |
| ENSG00000214401.4  | 17_44257783_A_G_b37 | rs2532252_KANSL1-AS1 | EUR | N | -13159  | SUBSTANTIA.NIGRA      | 32 | 35 | 0.219 | 1.125  | 0.114 | 4.67E-14 | 1.39E-12 |
| ENSG00000214401.4  | 17_44257783_A_G_b37 | rs2532252_KANSL1-AS1 | EUR | N | -13159  | AMYGDALA              | 43 | 52 | 0.295 | 0.811  | 0.107 | 1.71E-10 | 3.39E-09 |
| ENSG00000204650.9  | 17_44257783_A_G_b37 | rs2532252_LINC02210  | EUR | N | 560089  | CORTEX                | 63 | 72 | 0.269 | 0.644  | 0.058 | 6.14E-20 | 4.95E-18 |
| ENSG00000204650.9  | 17_44257783_A_G_b37 | rs2532252_LINC02210  | EUR | N | 560089  | NUCLEUS.ACCUMBENS     | 63 | 74 | 0.287 | 0.623  | 0.061 | 1.63E-17 | 8.90E-16 |
| ENSG00000204650.9  | 17_44257783_A_G_b37 | rs2532252_LINC02210  | EUR | N | 560089  | PUTAMEN               | 50 | 62 | 0.279 | 0.722  | 0.069 | 4.04E-17 | 2.14E-15 |
| ENSG00000204650.9  | 17_44257783_A_G_b37 | rs2532252_LINC02210  | EUR | N | 560089  | CAUDATE               | 64 | 74 | 0.259 | 0.734  | 0.075 | 5.86E-17 | 3.00E-15 |
| ENSG00000204650.9  | 17_44257783_A_G_b37 | rs2532252_LINC02210  | EUR | N | 560089  | SPINAL.CORD           | 36 | 43 | 0.259 | 1.011  | 0.088 | 7.53E-17 | 3.74E-15 |
| ENSG00000204650.9  | 17_44257783_A_G_b37 | rs2532252_LINC02210  | EUR | N | 560089  | CINGULATE             | 45 | 53 | 0.245 | 0.652  | 0.071 | 2.35E-14 | 7.70E-13 |
| ENSG00000204650.9  | 17_44257783_A_G_b37 | rs2532252_LINC02210  | EUR | N | 560089  | AMYGDALA              | 43 | 52 | 0.295 | 0.863  | 0.090 | 4.12E-14 | 1.27E-12 |
| ENSG00000204650.9  | 17_44257783_A_G_b37 | rs2532252_LINC02210  | EUR | N | 560089  | HIPPOCAMPUS           | 55 | 62 | 0.279 | 0.697  | 0.080 | 1.64E-13 | 4.63E-12 |
| ENSG00000204650.9  | 17_44257783_A_G_b37 | rs2532252_LINC02210  | EUR | N | 560089  | HYPOTHALAMUS          | 50 | 57 | 0.266 | 0.730  | 0.086 | 5.80E-13 | 1.53E-11 |
| ENSG00000204650.9  | 17_44257783_A_G_b37 | rs2532252_LINC02210  | EUR | N | 560089  | CEREBELLUM            | 71 | 85 | 0.278 | 0.548  | 0.070 | 1.97E-12 | 4.84E-11 |
| ENSG00000204650.9  | 17_44257783_A_G_b37 | rs2532252_LINC02210  | EUR | N | 560089  | FRONTAL.CORTEX        | 55 | 64 | 0.274 | 0.464  | 0.060 | 1.32E-11 | 2.92E-10 |
| ENSG00000204650.9  | 17_44257783_A_G_b37 | rs2532252_LINC02210  | EUR | N | 560089  | SUBSTANTIA.NIGRA      | 32 | 35 | 0.219 | 0.808  | 0.126 | 2.91E-08 | 5.00E-07 |
| ENSG00000204650.9  | 17_44257783_A_G_b37 | rs2532252_LINC02210  | EUR | N | 560089  | CEREBELLAR.HEMISPHERE | 57 | 65 | 0.260 | 0.376  | 0.068 | 2.67E-07 | 4.37E-06 |

|                    |                     |                      |     |   |         |                       |    |    |       |        |       |          |          |
|--------------------|---------------------|----------------------|-----|---|---------|-----------------------|----|----|-------|--------|-------|----------|----------|
| ENSG00000176681.10 | 17_44257783_A_G_b37 | rs2532252_LRRC37A    | EUR | Y | -112316 | CEREBELLAR.HEMISPHERE | 57 | 65 | 0.260 | 1.017  | 0.106 | 5.58E-16 | 2.41E-14 |
| ENSG00000176681.10 | 17_44257783_A_G_b37 | rs2532252_LRRC37A    | EUR | Y | -112316 | CEREBELLUM            | 71 | 85 | 0.278 | 0.898  | 0.097 | 1.51E-15 | 6.08E-14 |
| ENSG00000176681.10 | 17_44257783_A_G_b37 | rs2532252_LRRC37A    | EUR | Y | -112316 | HYPOTHALAMUS          | 50 | 57 | 0.266 | 0.860  | 0.145 | 6.36E-08 | 1.08E-06 |
| ENSG00000176681.10 | 17_44257783_A_G_b37 | rs2532252_LRRC37A    | EUR | Y | -112316 | SPINAL.CORD           | 36 | 43 | 0.259 | 0.883  | 0.151 | 2.04E-07 | 3.38E-06 |
| ENSG00000176681.10 | 17_44257783_A_G_b37 | rs2532252_LRRC37A    | EUR | Y | -112316 | CAUDATE               | 64 | 74 | 0.259 | 0.645  | 0.120 | 3.55E-07 | 5.68E-06 |
| ENSG00000176681.10 | 17_44257783_A_G_b37 | rs2532252_LRRC37A    | EUR | Y | -112316 | FRONTAL.CORTEX        | 55 | 64 | 0.274 | 0.666  | 0.131 | 1.68E-06 | 2.56E-05 |
| ENSG00000176681.10 | 17_44257783_A_G_b37 | rs2532252_LRRC37A    | EUR | Y | -112316 | CORTEX                | 63 | 72 | 0.269 | 0.585  | 0.120 | 3.36E-06 | 5.02E-05 |
| ENSG00000176681.10 | 17_44257783_A_G_b37 | rs2532252_LRRC37A    | EUR | Y | -112316 | CINGULATE             | 45 | 53 | 0.245 | 0.640  | 0.129 | 3.36E-06 | 5.02E-05 |
| ENSG00000176681.10 | 17_44257783_A_G_b37 | rs2532252_LRRC37A    | EUR | Y | -112316 | PUTAMEN               | 50 | 62 | 0.279 | 0.631  | 0.132 | 6.60E-06 | 9.63E-05 |
| ENSG00000176681.10 | 17_44257783_A_G_b37 | rs2532252_LRRC37A    | EUR | Y | -112316 | AMYGDALA              | 43 | 52 | 0.295 | 0.770  | 0.158 | 6.79E-06 | 9.87E-05 |
| ENSG00000176681.10 | 17_44257783_A_G_b37 | rs2532252_LRRC37A    | EUR | Y | -112316 | HIPPOCAMPUS           | 55 | 62 | 0.279 | 0.582  | 0.129 | 2.02E-05 | 2.84E-04 |
| ENSG00000176681.10 | 17_44257783_A_G_b37 | rs2532252_LRRC37A    | EUR | Y | -112316 | NUCLEUS.ACCUMBENS     | 63 | 74 | 0.287 | 0.550  | 0.128 | 3.73E-05 | 5.06E-04 |
| ENSG00000176681.10 | 17_44257783_A_G_b37 | rs2532252_LRRC37A    | EUR | Y | -112316 | SUBSTANTIA.NIGRA      | 32 | 35 | 0.219 | 0.655  | 0.207 | 0.002    | 0.026    |
| ENSG00000263142.1  | 17_44257783_A_G_b37 | rs2532252_LRRC37A1P  | EUR | N | -836776 | CEREBELLUM            | 71 | 85 | 0.278 | -0.438 | 0.102 | 3.62E-05 | 4.96E-04 |
| ENSG00000238083.3  | 17_44257783_A_G_b37 | rs2532252_LRRC37A2   | EUR | Y | -331094 | CEREBELLUM            | 71 | 85 | 0.278 | 1.089  | 0.069 | 5.44E-31 | 1.34E-27 |
| ENSG00000238083.3  | 17_44257783_A_G_b37 | rs2532252_LRRC37A2   | EUR | Y | -331094 | CEREBELLAR.HEMISPHERE | 57 | 65 | 0.260 | 1.280  | 0.078 | 1.90E-30 | 2.33E-27 |
| ENSG00000238083.3  | 17_44257783_A_G_b37 | rs2532252_LRRC37A2   | EUR | Y | -331094 | CORTEX                | 63 | 72 | 0.269 | 1.059  | 0.087 | 2.13E-22 | 2.99E-20 |
| ENSG00000238083.3  | 17_44257783_A_G_b37 | rs2532252_LRRC37A2   | EUR | Y | -331094 | CAUDATE               | 64 | 74 | 0.259 | 1.019  | 0.086 | 5.28E-22 | 6.65E-20 |
| ENSG00000238083.3  | 17_44257783_A_G_b37 | rs2532252_LRRC37A2   | EUR | Y | -331094 | NUCLEUS.ACCUMBENS     | 63 | 74 | 0.287 | 1.057  | 0.091 | 8.00E-21 | 8.02E-19 |
| ENSG00000238083.3  | 17_44257783_A_G_b37 | rs2532252_LRRC37A2   | EUR | Y | -331094 | CINGULATE             | 45 | 53 | 0.245 | 1.153  | 0.094 | 1.40E-20 | 1.32E-18 |
| ENSG00000238083.3  | 17_44257783_A_G_b37 | rs2532252_LRRC37A2   | EUR | Y | -331094 | HYPOTHALAMUS          | 50 | 57 | 0.266 | 1.199  | 0.103 | 1.88E-19 | 1.40E-17 |
| ENSG00000238083.3  | 17_44257783_A_G_b37 | rs2532252_LRRC37A2   | EUR | Y | -331094 | PUTAMEN               | 50 | 62 | 0.279 | 1.013  | 0.098 | 6.65E-17 | 3.37E-15 |
| ENSG00000238083.3  | 17_44257783_A_G_b37 | rs2532252_LRRC37A2   | EUR | Y | -331094 | FRONTAL.CORTEX        | 55 | 64 | 0.274 | 1.031  | 0.102 | 7.14E-17 | 3.58E-15 |
| ENSG00000238083.3  | 17_44257783_A_G_b37 | rs2532252_LRRC37A2   | EUR | Y | -331094 | HIPPOCAMPUS           | 55 | 62 | 0.279 | 0.969  | 0.097 | 3.84E-16 | 1.72E-14 |
| ENSG00000238083.3  | 17_44257783_A_G_b37 | rs2532252_LRRC37A2   | EUR | Y | -331094 | SPINAL.CORD           | 36 | 43 | 0.259 | 1.130  | 0.106 | 1.64E-15 | 6.50E-14 |
| ENSG00000238083.3  | 17_44257783_A_G_b37 | rs2532252_LRRC37A2   | EUR | Y | -331094 | AMYGDALA              | 43 | 52 | 0.295 | 1.059  | 0.106 | 9.16E-15 | 3.31E-13 |
| ENSG00000238083.3  | 17_44257783_A_G_b37 | rs2532252_LRRC37A2   | EUR | Y | -331094 | SUBSTANTIA.NIGRA      | 32 | 35 | 0.219 | 1.057  | 0.128 | 2.40E-11 | 5.15E-10 |
| ENSG00000214425.2  | 17_44257783_A_G_b37 | rs2532252_LRRC37A4P  | EUR | N | 630082  | CEREBELLAR.HEMISPHERE | 57 | 65 | 0.260 | -1.086 | 0.064 | 1.65E-31 | 8.11E-28 |
| ENSG00000214425.2  | 17_44257783_A_G_b37 | rs2532252_LRRC37A4P  | EUR | N | 630082  | CEREBELLUM            | 71 | 85 | 0.278 | -1.062 | 0.068 | 1.61E-30 | 2.35E-27 |
| ENSG00000214425.2  | 17_44257783_A_G_b37 | rs2532252_LRRC37A4P  | EUR | N | 630082  | CORTEX                | 63 | 72 | 0.269 | -1.066 | 0.070 | 4.72E-29 | 2.58E-26 |
| ENSG00000214425.2  | 17_44257783_A_G_b37 | rs2532252_LRRC37A4P  | EUR | N | 630082  | HYPOTHALAMUS          | 50 | 57 | 0.266 | -1.159 | 0.070 | 1.71E-28 | 8.40E-26 |
| ENSG00000214425.2  | 17_44257783_A_G_b37 | rs2532252_LRRC37A4P  | EUR | N | 630082  | NUCLEUS.ACCUMBENS     | 63 | 74 | 0.287 | -1.012 | 0.070 | 4.24E-27 | 1.39E-24 |
| ENSG00000214425.2  | 17_44257783_A_G_b37 | rs2532252_LRRC37A4P  | EUR | N | 630082  | CAUDATE               | 64 | 74 | 0.259 | -0.956 | 0.071 | 6.33E-26 | 1.83E-23 |
| ENSG00000214425.2  | 17_44257783_A_G_b37 | rs2532252_LRRC37A4P  | EUR | N | 630082  | HIPPOCAMPUS           | 55 | 62 | 0.279 | -1.061 | 0.082 | 3.09E-22 | 4.22E-20 |
| ENSG00000214425.2  | 17_44257783_A_G_b37 | rs2532252_LRRC37A4P  | EUR | N | 630082  | PUTAMEN               | 50 | 62 | 0.279 | -1.096 | 0.086 | 9.70E-22 | 1.14E-19 |
| ENSG00000214425.2  | 17_44257783_A_G_b37 | rs2532252_LRRC37A4P  | EUR | N | 630082  | CINGULATE             | 45 | 53 | 0.245 | -1.094 | 0.087 | 3.63E-21 | 3.88E-19 |
| ENSG00000214425.2  | 17_44257783_A_G_b37 | rs2532252_LRRC37A4P  | EUR | N | 630082  | FRONTAL.CORTEX        | 55 | 64 | 0.274 | -0.997 | 0.083 | 6.25E-21 | 6.40E-19 |
| ENSG00000214425.2  | 17_44257783_A_G_b37 | rs2532252_LRRC37A4P  | EUR | N | 630082  | SPINAL.CORD           | 36 | 43 | 0.259 | -1.288 | 0.092 | 1.01E-20 | 9.73E-19 |
| ENSG00000214425.2  | 17_44257783_A_G_b37 | rs2532252_LRRC37A4P  | EUR | N | 630082  | AMYGDALA              | 43 | 52 | 0.295 | -1.129 | 0.095 | 5.98E-18 | 3.67E-16 |
| ENSG00000214425.2  | 17_44257783_A_G_b37 | rs2532252_LRRC37A4P  | EUR | N | 630082  | SUBSTANTIA.NIGRA      | 32 | 35 | 0.219 | -1.241 | 0.123 | 2.07E-14 | 6.87E-13 |
| ENSG00000262500.1  | 17_44257783_A_G_b37 | rs2532252_MAPK8IP1P1 | EUR | N | -63189  | CEREBELLAR.HEMISPHERE | 57 | 65 | 0.260 | 1.114  | 0.087 | 3.50E-23 | 5.55E-21 |
| ENSG00000262500.1  | 17_44257783_A_G_b37 | rs2532252_MAPK8IP1P1 | EUR | N | -63189  | CEREBELLUM            | 71 | 85 | 0.278 | 1.030  | 0.086 | 5.10E-22 | 6.60E-20 |
| ENSG00000262500.1  | 17_44257783_A_G_b37 | rs2532252_MAPK8IP1P1 | EUR | N | -63189  | CAUDATE               | 64 | 74 | 0.259 | 1.052  | 0.097 | 1.61E-19 | 1.22E-17 |
| ENSG00000262500.1  | 17_44257783_A_G_b37 | rs2532252_MAPK8IP1P1 | EUR | N | -63189  | CORTEX                | 63 | 72 | 0.269 | 1.051  | 0.102 | 4.32E-18 | 2.72E-16 |
| ENSG00000262500.1  | 17_44257783_A_G_b37 | rs2532252_MAPK8IP1P1 | EUR | N | -63189  | HIPPOCAMPUS           | 55 | 62 | 0.279 | 1.070  | 0.103 | 5.32E-17 | 2.75E-15 |
| ENSG00000262500.1  | 17_44257783_A_G_b37 | rs2532252_MAPK8IP1P1 | EUR | N | -63189  | CINGULATE             | 45 | 53 | 0.245 | 1.015  | 0.113 | 4.55E-14 | 1.36E-12 |
| ENSG00000262500.1  | 17_44257783_A_G_b37 | rs2532252_MAPK8IP1P1 | EUR | N | -63189  | NUCLEUS.ACCUMBENS     | 63 | 74 | 0.287 | 0.960  | 0.112 | 6.74E-14 | 1.98E-12 |
| ENSG00000262500.1  | 17_44257783_A_G_b37 | rs2532252_MAPK8IP1P1 | EUR | N | -63189  | PUTAMEN               | 50 | 62 | 0.279 | 0.986  | 0.112 | 1.00E-13 | 2.91E-12 |
| ENSG00000262500.1  | 17_44257783_A_G_b37 | rs2532252_MAPK8IP1P1 | EUR | N | -63189  | FRONTAL.CORTEX        | 55 | 64 | 0.274 | 0.997  | 0.117 | 2.12E-13 | 5.95E-12 |
| ENSG00000262500.1  | 17_44257783_A_G_b37 | rs2532252_MAPK8IP1P1 | EUR | N | -63189  | HYPOTHALAMUS          | 50 | 57 | 0.266 | 0.938  | 0.116 | 3.45E-12 | 8.23E-11 |
| ENSG00000262500.1  | 17_44257783_A_G_b37 | rs2532252_MAPK8IP1P1 | EUR | N | -63189  | SUBSTANTIA.NIGRA      | 32 | 35 | 0.219 | 1.379  | 0.170 | 4.09E-11 | 8.55E-10 |
| ENSG00000262500.1  | 17_44257783_A_G_b37 | rs2532252_MAPK8IP1P1 | EUR | N | -63189  | AMYGDALA              | 43 | 52 | 0.295 | 0.929  | 0.123 | 1.90E-10 | 3.75E-09 |
| ENSG00000262500.1  | 17_44257783_A_G_b37 | rs2532252_MAPK8IP1P1 | EUR | N | -63189  | SPINAL.CORD           | 36 | 43 | 0.259 | 0.987  | 0.136 | 7.61E-10 | 1.43E-08 |
| ENSG00000263503.1  | 17_44257783_A_G_b37 | rs2532252_MAPK8IP1P2 | EUR | N | 578077  | CEREBELLUM            | 71 | 85 | 0.278 | 1.034  | 0.084 | 5.26E-23 | 8.08E-21 |
| ENSG00000263503.1  | 17_44257783_A_G_b37 | rs2532252_MAPK8IP1P2 | EUR | N | 578077  | CEREBELLAR.HEMISPHERE | 57 | 65 | 0.260 | 1.093  | 0.091 | 2.41E-21 | 2.69E-19 |
| ENSG00000263503.1  | 17_44257783_A_G_b37 | rs2532252_MAPK8IP1P2 | EUR | N | 578077  | CORTEX                | 63 | 72 | 0.269 | 1.106  | 0.099 | 4.22E-20 | 3.46E-18 |
| ENSG00000263503.1  | 17_44257783_A_G_b37 | rs2532252_MAPK8IP1P2 | EUR | N | 578077  | PUTAMEN               | 50 | 62 | 0.279 | 1.037  | 0.099 | 4.16E-17 | 2.18E-15 |
| ENSG00000263503.1  | 17_44257783_A_G_b37 | rs2532252_MAPK8IP1P2 | EUR | N | 578077  | HIPPOCAMPUS           | 55 | 62 | 0.279 | 1.064  | 0.107 | 3.34E-16 | 1.51E-14 |
| ENSG00000263503.1  | 17_44257783_A_G_b37 | rs2532252_MAPK8IP1P2 | EUR | N | 578077  | CAUDATE               | 64 | 74 | 0.259 | 0.977  | 0.104 | 4.12E-16 | 1.81E-14 |
| ENSG00000263503.1  | 17_44257783_A_G_b37 | rs2532252_MAPK8IP1P2 | EUR | N | 578077  | CINGULATE             | 45 | 53 | 0.245 | 1.035  | 0.105 | 9.35E-16 | 3.93E-14 |
| ENSG00000263503.1  | 17_44257783_A_G_b37 | rs2532252_MAPK8IP1P2 | EUR | N | 578077  | HYPOTHALAMUS          | 50 | 57 | 0.266 | 1.079  | 0.118 | 2.29E-14 | 7.55E-13 |

|                     |                     |                      |     |   |         |                       |     |     |       |        |       |          |          |
|---------------------|---------------------|----------------------|-----|---|---------|-----------------------|-----|-----|-------|--------|-------|----------|----------|
| ENSG00000263503.1   | 17_44257783_A_G_b37 | rs2532252_MAPK8IP1P2 | EUR | N | 578077  | NUCLEUS.ACCUMBENS     | 63  | 74  | 0.287 | 0.956  | 0.109 | 2.76E-14 | 8.81E-13 |
| ENSG00000263503.1   | 17_44257783_A_G_b37 | rs2532252_MAPK8IP1P2 | EUR | N | 578077  | AMYGDALA              | 43  | 52  | 0.295 | 1.000  | 0.109 | 2.52E-13 | 7.04E-12 |
| ENSG00000263503.1   | 17_44257783_A_G_b37 | rs2532252_MAPK8IP1P2 | EUR | N | 578077  | SPINAL.CORD           | 36  | 43  | 0.259 | 1.077  | 0.119 | 7.56E-13 | 1.96E-11 |
| ENSG00000263503.1   | 17_44257783_A_G_b37 | rs2532252_MAPK8IP1P2 | EUR | N | 578077  | SUBSTANTIA.NIGRA      | 32  | 35  | 0.219 | 1.438  | 0.163 | 2.54E-12 | 6.15E-11 |
| ENSG00000263503.1   | 17_44257783_A_G_b37 | rs2532252_MAPK8IP1P2 | EUR | N | 578077  | FRONTAL.CORTEX        | 55  | 64  | 0.274 | 0.914  | 0.117 | 7.96E-12 | 1.80E-10 |
| ENSG00000186868.11  | 17_44257783_A_G_b37 | rs2532252_MAPT       | EUR | Y | 286035  | CEREBELLUM            | 71  | 85  | 0.278 | -0.296 | 0.064 | 9.07E-06 | 1.30E-04 |
| ENSG00000264589.1   | 17_44257783_A_G_b37 | rs2532252_MAPT-AS1   | EUR | N | 284817  | NUCLEUS.ACCUMBENS     | 63  | 74  | 0.287 | -0.618 | 0.116 | 5.53E-07 | 8.68E-06 |
| ENSG00000264589.1   | 17_44257783_A_G_b37 | rs2532252_MAPT-AS1   | EUR | N | 284817  | CEREBELLUM            | 71  | 85  | 0.278 | 0.481  | 0.094 | 1.30E-06 | 2.01E-05 |
| ENSG00000264589.1   | 17_44257783_A_G_b37 | rs2532252_MAPT-AS1   | EUR | N | 284817  | AMYGDALA              | 43  | 52  | 0.295 | -0.401 | 0.102 | 2.10E-04 | 0.003    |
| ENSG00000264589.1   | 17_44257783_A_G_b37 | rs2532252_MAPT-AS1   | EUR | N | 284817  | PUTAMEN               | 50  | 62  | 0.279 | -0.459 | 0.123 | 3.51E-04 | 0.004    |
| ENSG00000264589.1   | 17_44257783_A_G_b37 | rs2532252_MAPT-AS1   | EUR | N | 284817  | SPINAL.CORD           | 36  | 43  | 0.259 | -0.478 | 0.139 | 0.001    | 0.012    |
| ENSG00000264589.1   | 17_44257783_A_G_b37 | rs2532252_MAPT-AS1   | EUR | N | 284817  | HYPOTHALAMUS          | 50  | 57  | 0.266 | -0.350 | 0.109 | 0.002    | 0.020    |
| ENSG00000264589.1   | 17_44257783_A_G_b37 | rs2532252_MAPT-AS1   | EUR | N | 284817  | FRONTAL.CORTEX        | 55  | 64  | 0.274 | -0.371 | 0.120 | 0.003    | 0.027    |
| ENSG00000264589.1   | 17_44257783_A_G_b37 | rs2532252_MAPT-AS1   | EUR | N | 284817  | CINGULATE             | 45  | 53  | 0.245 | -0.303 | 0.104 | 0.004    | 0.043    |
| ENSG00000073969.14  | 17_44257783_A_G_b37 | rs2532252_NSF        | EUR | Y | -410252 | CEREBELLUM            | 71  | 85  | 0.278 | -0.179 | 0.041 | 2.75E-05 | 3.84E-04 |
| ENSG00000225190.4   | 17_44257783_A_G_b37 | rs2532252_PLEKHM1    | EUR | Y | 689668  | CEREBELLUM            | 71  | 85  | 0.278 | -0.899 | 0.063 | 4.11E-27 | 1.39E-24 |
| ENSG00000225190.4   | 17_44257783_A_G_b37 | rs2532252_PLEKHM1    | EUR | Y | 689668  | CEREBELLAR.HEMISPHERE | 57  | 65  | 0.260 | -0.776 | 0.070 | 3.08E-19 | 2.23E-17 |
| ENSG00000225190.4   | 17_44257783_A_G_b37 | rs2532252_PLEKHM1    | EUR | Y | 689668  | CORTEX                | 63  | 72  | 0.269 | 0.448  | 0.076 | 4.20E-08 | 7.17E-07 |
| ENSG00000225190.4   | 17_44257783_A_G_b37 | rs2532252_PLEKHM1    | EUR | Y | 689668  | FRONTAL.CORTEX        | 55  | 64  | 0.274 | 0.350  | 0.082 | 4.60E-05 | 6.21E-04 |
| ENSG00000225190.4   | 17_44257783_A_G_b37 | rs2532252_PLEKHM1    | EUR | Y | 689668  | NUCLEUS.ACCUMBENS     | 63  | 74  | 0.287 | 0.317  | 0.077 | 7.32E-05 | 9.75E-04 |
| ENSG00000225190.4   | 17_44257783_A_G_b37 | rs2532252_PLEKHM1    | EUR | Y | 689668  | PUTAMEN               | 50  | 62  | 0.279 | 0.316  | 0.077 | 8.65E-05 | 0.001    |
| ENSG00000225190.4   | 17_44257783_A_G_b37 | rs2532252_PLEKHM1    | EUR | Y | 689668  | CINGULATE             | 45  | 53  | 0.245 | 0.282  | 0.070 | 1.25E-04 | 0.002    |
| ENSG00000225190.4   | 17_44257783_A_G_b37 | rs2532252_PLEKHM1    | EUR | Y | 689668  | CAUDATE               | 64  | 74  | 0.259 | 0.202  | 0.062 | 0.001    | 0.016    |
| ENSG00000204652.5   | 17_44257783_A_G_b37 | rs2532252_RPS26P8    | EUR | N | 571874  | SPINAL.CORD           | 36  | 43  | 0.259 | 0.675  | 0.168 | 1.62E-04 | 0.002    |
| ENSG00000185294.5   | 17_44257783_A_G_b37 | rs2532252_SPPL2C     | EUR | Y | 335527  | CEREBELLUM            | 71  | 85  | 0.278 | 0.665  | 0.069 | 1.67E-16 | 7.82E-15 |
| ENSG00000185294.5   | 17_44257783_A_G_b37 | rs2532252_SPPL2C     | EUR | Y | 335527  | CEREBELLAR.HEMISPHERE | 57  | 65  | 0.260 | 0.599  | 0.083 | 8.98E-11 | 1.80E-09 |
| ENSG00000185294.5   | 17_44257783_A_G_b37 | rs2532252_SPPL2C     | EUR | Y | 335527  | FRONTAL.CORTEX        | 55  | 64  | 0.274 | 0.407  | 0.109 | 3.35E-04 | 0.004    |
| ENSG00000185294.5   | 17_44257783_A_G_b37 | rs2532252_SPPL2C     | EUR | Y | 335527  | CORTEX                | 63  | 72  | 0.269 | 0.293  | 0.098 | 0.003    | 0.034    |
| ENSG0000014520.10   | 3_49898000_A_G_b37  | rs2777888_AMT        | EUR | Y | 437814  | HYPOTHALAMUS          | 76  | 106 | 0.491 | -0.225 | 0.063 | 5.83E-04 | 0.007    |
| ENSG00000164076.12  | 3_49898000_A_G_b37  | rs2777888_CAMKV      | EUR | Y | -9655   | NUCLEUS.ACCUMBENS     | 94  | 128 | 0.492 | 0.109  | 0.032 | 0.001    | 0.012    |
| ENSG00000173402.7   | 3_49898000_A_G_b37  | rs2777888_DAG1       | EUR | Y | 391854  | CEREBELLAR.HEMISPHERE | 89  | 123 | 0.492 | -0.126 | 0.043 | 0.004    | 0.043    |
| ENSG00000233276.2   | 3_49898000_A_G_b37  | rs2777888_GPX1       | EUR | Y | 501967  | CEREBELLUM            | 111 | 154 | 0.500 | 0.172  | 0.055 | 0.002    | 0.023    |
| ENSG00000186792.11  | 3_49898000_A_G_b37  | rs2777888_HYAL3      | EUR | Y | -435204 | NUCLEUS.ACCUMBENS     | 94  | 128 | 0.492 | -0.288 | 0.074 | 1.57E-04 | 0.002    |
| ENSG00000186792.11  | 3_49898000_A_G_b37  | rs2777888_HYAL3      | EUR | Y | -435204 | CEREBELLUM            | 111 | 154 | 0.500 | -0.262 | 0.075 | 7.04E-04 | 0.008    |
| ENSG00000186792.11  | 3_49898000_A_G_b37  | rs2777888_HYAL3      | EUR | Y | -435204 | SUBSTANTIA.NIGRA      | 55  | 79  | 0.494 | -0.235 | 0.079 | 0.004    | 0.041    |
| ENSG00000185614.4   | 3_49898000_A_G_b37  | rs2777888_INKA1      | EUR | N | 57313   | CEREBELLUM            | 111 | 154 | 0.500 | 0.470  | 0.060 | 1.70E-12 | 4.22E-11 |
| ENSG00000185614.4   | 3_49898000_A_G_b37  | rs2777888_INKA1      | EUR | N | 57313   | CEREBELLAR.HEMISPHERE | 89  | 123 | 0.492 | 0.413  | 0.064 | 3.98E-09 | 7.27E-08 |
| ENSG00000164078.8   | 3_49898000_A_G_b37  | rs2777888_MST1R      | EUR | Y | -43277  | CEREBELLUM            | 111 | 154 | 0.500 | 0.482  | 0.067 | 5.17E-11 | 1.07E-09 |
| ENSG00000164078.8   | 3_49898000_A_G_b37  | rs2777888_MST1R      | EUR | Y | -43277  | CORTEX                | 95  | 133 | 0.489 | 0.445  | 0.088 | 1.55E-06 | 2.37E-05 |
| ENSG00000164078.8   | 3_49898000_A_G_b37  | rs2777888_MST1R      | EUR | Y | -43277  | CEREBELLAR.HEMISPHERE | 89  | 123 | 0.492 | 0.361  | 0.073 | 3.25E-06 | 4.88E-05 |
| ENSG00000164078.8   | 3_49898000_A_G_b37  | rs2777888_MST1R      | EUR | Y | -43277  | CAUDATE               | 107 | 143 | 0.497 | 0.362  | 0.074 | 3.49E-06 | 5.20E-05 |
| ENSG00000164078.8   | 3_49898000_A_G_b37  | rs2777888_MST1R      | EUR | Y | -43277  | CINGULATE             | 79  | 104 | 0.477 | 0.385  | 0.099 | 2.06E-04 | 0.003    |
| ENSG00000164078.8   | 3_49898000_A_G_b37  | rs2777888_MST1R      | EUR | Y | -43277  | NUCLEUS.ACCUMBENS     | 94  | 128 | 0.492 | 0.304  | 0.083 | 4.12E-04 | 0.005    |
| ENSG00000164078.8   | 3_49898000_A_G_b37  | rs2777888_MST1R      | EUR | Y | -43277  | HYPOTHALAMUS          | 76  | 106 | 0.491 | 0.304  | 0.099 | 0.003    | 0.029    |
| ENSG00000243477.1   | 3_49898000_A_G_b37  | rs2777888_NAA80      | EUR | Y | -438852 | CINGULATE             | 79  | 104 | 0.477 | 0.161  | 0.052 | 0.003    | 0.027    |
| ENSG00000068028.13  | 3_49898000_A_G_b37  | rs2777888_RASSF1     | EUR | Y | -480343 | CEREBELLUM            | 111 | 154 | 0.500 | 0.167  | 0.058 | 0.005    | 0.045    |
| ENSG00000003756.12  | 3_49898000_A_G_b37  | rs2777888_RBM5       | EUR | Y | -228341 | PUTAMEN               | 79  | 108 | 0.486 | -0.187 | 0.062 | 0.003    | 0.035    |
| ENSG000000004534.10 | 3_49898000_A_G_b37  | rs2777888_RBM6       | EUR | Y | -79440  | CEREBELLUM            | 111 | 154 | 0.500 | -0.633 | 0.041 | 4.02E-30 | 3.82E-27 |
| ENSG000000004534.10 | 3_49898000_A_G_b37  | rs2777888_RBM6       | EUR | Y | -79440  | NUCLEUS.ACCUMBENS     | 94  | 128 | 0.492 | -0.473 | 0.048 | 1.14E-16 | 5.44E-15 |
| ENSG000000004534.10 | 3_49898000_A_G_b37  | rs2777888_RBM6       | EUR | Y | -79440  | CINGULATE             | 79  | 104 | 0.477 | -0.455 | 0.048 | 3.79E-15 | 1.43E-13 |
| ENSG000000004534.10 | 3_49898000_A_G_b37  | rs2777888_RBM6       | EUR | Y | -79440  | CORTEX                | 95  | 133 | 0.489 | -0.575 | 0.065 | 1.52E-14 | 5.26E-13 |
| ENSG000000004534.10 | 3_49898000_A_G_b37  | rs2777888_RBM6       | EUR | Y | -79440  | CEREBELLAR.HEMISPHERE | 89  | 123 | 0.492 | -0.397 | 0.045 | 2.63E-14 | 8.50E-13 |
| ENSG000000004534.10 | 3_49898000_A_G_b37  | rs2777888_RBM6       | EUR | Y | -79440  | PUTAMEN               | 79  | 108 | 0.486 | -0.511 | 0.060 | 4.14E-13 | 1.13E-11 |
| ENSG000000004534.10 | 3_49898000_A_G_b37  | rs2777888_RBM6       | EUR | Y | -79440  | CAUDATE               | 107 | 143 | 0.497 | -0.416 | 0.056 | 1.40E-11 | 3.07E-10 |
| ENSG000000004534.10 | 3_49898000_A_G_b37  | rs2777888_RBM6       | EUR | Y | -79440  | FRONTAL.CORTEX        | 86  | 118 | 0.500 | -0.420 | 0.056 | 2.96E-11 | 6.24E-10 |
| ENSG000000004534.10 | 3_49898000_A_G_b37  | rs2777888_RBM6       | EUR | Y | -79440  | SPINAL.CORD           | 59  | 81  | 0.488 | -0.481 | 0.072 | 8.15E-09 | 1.45E-07 |
| ENSG000000004534.10 | 3_49898000_A_G_b37  | rs2777888_RBM6       | EUR | Y | -79440  | HIPPOCAMPUS           | 76  | 104 | 0.468 | -0.248 | 0.045 | 4.41E-07 | 7.01E-06 |
| ENSG000000004534.10 | 3_49898000_A_G_b37  | rs2777888_RBM6       | EUR | Y | -79440  | SUBSTANTIA.NIGRA      | 55  | 79  | 0.494 | -0.303 | 0.055 | 7.74E-07 | 1.21E-05 |
| ENSG000000004534.10 | 3_49898000_A_G_b37  | rs2777888_RBM6       | EUR | Y | -79440  | HYPOTHALAMUS          | 76  | 106 | 0.491 | -0.295 | 0.065 | 2.00E-05 | 2.82E-04 |
| ENSG000000004534.10 | 3_49898000_A_G_b37  | rs2777888_RBM6       | EUR | Y | -79440  | AMYGDALA              | 64  | 88  | 0.500 | -0.289 | 0.068 | 7.22E-05 | 9.64E-04 |
| ENSG00000164068.11  | 3_49898000_A_G_b37  | rs2777888_RNF123     | EUR | Y | 171065  | CEREBELLUM            | 111 | 154 | 0.500 | 0.285  | 0.043 | 1.28E-09 | 2.39E-08 |

|                    |                     |                       |       |   |         |                       |     |     |       |        |       |          |          |
|--------------------|---------------------|-----------------------|-------|---|---------|-----------------------|-----|-----|-------|--------|-------|----------|----------|
| ENSG00000164068.11 | 3_49898000_A_G_b37  | rs2777888_RNF123      | EUR   | Y | 171065  | HYPOTHALAMUS          | 76  | 106 | 0.491 | 0.187  | 0.039 | 6.47E-06 | 9.46E-05 |
| ENSG00000164068.11 | 3_49898000_A_G_b37  | rs2777888_RNF123      | EUR   | Y | 171065  | CAUDATE               | 107 | 143 | 0.497 | 0.142  | 0.031 | 8.92E-06 | 1.28E-04 |
| ENSG00000164068.11 | 3_49898000_A_G_b37  | rs2777888_RNF123      | EUR   | Y | 171065  | CEREBELLAR.HEMISPHERE | 89  | 123 | 0.492 | 0.209  | 0.048 | 2.78E-05 | 3.86E-04 |
| ENSG00000164068.11 | 3_49898000_A_G_b37  | rs2777888_RNF123      | EUR   | Y | 171065  | NUCLEUS.ACCUMBENS     | 94  | 128 | 0.492 | 0.161  | 0.037 | 3.38E-05 | 4.65E-04 |
| ENSG00000164068.11 | 3_49898000_A_G_b37  | rs2777888_RNF123      | EUR   | Y | 171065  | CORTEX                | 95  | 133 | 0.489 | 0.153  | 0.038 | 1.00E-04 | 0.001    |
| ENSG00000164068.11 | 3_49898000_A_G_b37  | rs2777888_RNF123      | EUR   | Y | 171065  | CINGULATE             | 79  | 104 | 0.477 | 0.133  | 0.034 | 2.16E-04 | 0.003    |
| ENSG00000164068.11 | 3_49898000_A_G_b37  | rs2777888_RNF123      | EUR   | Y | 171065  | FRONTAL.CORTEX        | 86  | 118 | 0.500 | 0.111  | 0.031 | 6.48E-04 | 0.008    |
| ENSG00000164068.11 | 3_49898000_A_G_b37  | rs2777888_RNF123      | EUR   | Y | 171065  | PUTAMEN               | 79  | 108 | 0.486 | 0.108  | 0.033 | 0.002    | 0.019    |
| ENSG00000164068.11 | 3_49898000_A_G_b37  | rs2777888_RNF123      | EUR   | Y | 171065  | SUBSTANTIA.NIGRA      | 55  | 79  | 0.494 | 0.162  | 0.054 | 0.004    | 0.041    |
| ENSG00000235016.1  | 3_49898000_A_G_b37  | rs2777888_SEMA3F-AS1  | EUR   | N | -295518 | CEREBELLAR.HEMISPHERE | 89  | 123 | 0.492 | 0.294  | 0.077 | 2.23E-04 | 0.003    |
| ENSG00000114316.8  | 3_49898000_A_G_b37  | rs2777888_USP4        | EUR   | Y | 519855  | NUCLEUS.ACCUMBENS     | 94  | 128 | 0.492 | -0.243 | 0.075 | 0.002    | 0.018    |
| ENSG00000272918.1  | 7_104907066_G_C_b37 | rs67529088_AC005070.3 | EUR   | N | 161181  | SUBSTANTIA.NIGRA      | 57  | 70  | 0.438 | 0.391  | 0.109 | 6.97E-04 | 0.008    |
| ENSG00000135250.12 | 7_104907066_G_C_b37 | rs67529088_SRPK2      | EUR   | Y | -132689 | PUTAMEN               | 81  | 106 | 0.477 | -0.124 | 0.038 | 0.002    | 0.017    |
| ENSG00000251411.1  | 4_88281182_G_A_b37  | rs7688962_AC093827.3  | EUR   | N | 445212  | PUTAMEN               | 44  | 49  | 0.221 | -0.447 | 0.133 | 0.001    | 0.013    |
| ENSG00000267325.1  | 18_53305735_T_C_b37 | rs12458015_LINCO1415  | TRANS | N | -143217 | NUCLEUS.ACCUMBENS     | 73  | 86  | 0.336 | -0.238 | 0.082 | 0.005    | 0.044    |
| ENSG00000196628.9  | 18_53305735_T_C_b37 | rs12458015_TCF4       | TRANS | Y | -26283  | CINGULATE             | 60  | 71  | 0.329 | -0.271 | 0.090 | 0.003    | 0.034    |
| ENSG00000251411.1  | 4_88259008_G_A_b37  | rs12649023_AC093827.3 | TRANS | N | 423038  | PUTAMEN               | 40  | 42  | 0.189 | -0.472 | 0.149 | 0.002    | 0.022    |
| ENSG00000267344.1  | 17_43740565_G_T_b37 | rs1724409_AC003070.1  | TRANS | N | 266174  | CEREBELLUM            | 82  | 102 | 0.331 | 0.326  | 0.113 | 0.005    | 0.046    |
| ENSG00000261575.2  | 17_43740565_G_T_b37 | rs1724409_AC005829.1  | TRANS | N | -603838 | CEREBELLUM            | 82  | 102 | 0.331 | -0.970 | 0.075 | 2.24E-24 | 5.24E-22 |
| ENSG00000261575.2  | 17_43740565_G_T_b37 | rs1724409_AC005829.1  | TRANS | N | -603838 | CEREBELLAR.HEMISPHERE | 64  | 80  | 0.320 | -0.974 | 0.084 | 1.71E-20 | 1.55E-18 |
| ENSG00000261575.2  | 17_43740565_G_T_b37 | rs1724409_AC005829.1  | TRANS | N | -603838 | CAUDATE               | 76  | 92  | 0.319 | -0.827 | 0.102 | 4.66E-13 | 1.27E-11 |
| ENSG00000261575.2  | 17_43740565_G_T_b37 | rs1724409_AC005829.1  | TRANS | N | -603838 | NUCLEUS.ACCUMBENS     | 74  | 91  | 0.350 | -0.763 | 0.095 | 1.52E-12 | 3.81E-11 |
| ENSG00000261575.2  | 17_43740565_G_T_b37 | rs1724409_AC005829.1  | TRANS | N | -603838 | CORTEX                | 72  | 89  | 0.327 | -0.791 | 0.103 | 5.63E-12 | 1.31E-10 |
| ENSG00000261575.2  | 17_43740565_G_T_b37 | rs1724409_AC005829.1  | TRANS | N | -603838 | PUTAMEN               | 60  | 75  | 0.338 | -0.858 | 0.115 | 4.90E-11 | 1.02E-09 |
| ENSG00000261575.2  | 17_43740565_G_T_b37 | rs1724409_AC005829.1  | TRANS | N | -603838 | CINGULATE             | 54  | 66  | 0.303 | -0.685 | 0.110 | 1.55E-08 | 2.71E-07 |
| ENSG00000261575.2  | 17_43740565_G_T_b37 | rs1724409_AC005829.1  | TRANS | N | -603838 | FRONTAL.CORTEX        | 66  | 82  | 0.347 | -0.593 | 0.110 | 4.62E-07 | 7.32E-06 |
| ENSG00000261575.2  | 17_43740565_G_T_b37 | rs1724409_AC005829.1  | TRANS | N | -603838 | HYPOTHALAMUS          | 59  | 72  | 0.333 | -0.662 | 0.129 | 1.64E-06 | 2.50E-05 |
| ENSG00000261575.2  | 17_43740565_G_T_b37 | rs1724409_AC005829.1  | TRANS | N | -603838 | AMYGDALA              | 48  | 61  | 0.347 | -0.625 | 0.125 | 4.68E-06 | 6.91E-05 |
| ENSG00000261575.2  | 17_43740565_G_T_b37 | rs1724409_AC005829.1  | TRANS | N | -603838 | SPINAL.CORD           | 42  | 51  | 0.307 | -0.723 | 0.162 | 3.50E-05 | 4.81E-04 |
| ENSG00000261575.2  | 17_43740565_G_T_b37 | rs1724409_AC005829.1  | TRANS | N | -603838 | SUBSTANTIA.NIGRA      | 40  | 47  | 0.294 | -0.686 | 0.159 | 6.04E-05 | 8.11E-04 |
| ENSG00000261575.2  | 17_43740565_G_T_b37 | rs1724409_AC005829.1  | TRANS | N | -603838 | HIPPOCAMPUS           | 63  | 77  | 0.347 | -0.504 | 0.126 | 1.32E-04 | 0.002    |
| ENSG00000262539.1  | 17_43740565_G_T_b37 | rs1724409_AC005829.2  | TRANS | N | -597407 | CEREBELLUM            | 82  | 102 | 0.331 | -1.050 | 0.082 | 4.88E-24 | 1.04E-21 |
| ENSG00000262539.1  | 17_43740565_G_T_b37 | rs1724409_AC005829.2  | TRANS | N | -597407 | NUCLEUS.ACCUMBENS     | 74  | 91  | 0.350 | -1.037 | 0.090 | 1.73E-20 | 1.55E-18 |
| ENSG00000262539.1  | 17_43740565_G_T_b37 | rs1724409_AC005829.2  | TRANS | N | -597407 | CAUDATE               | 76  | 92  | 0.319 | -0.970 | 0.091 | 4.01E-19 | 2.82E-17 |
| ENSG00000262539.1  | 17_43740565_G_T_b37 | rs1724409_AC005829.2  | TRANS | N | -597407 | CORTEX                | 72  | 89  | 0.327 | -0.926 | 0.090 | 5.09E-18 | 3.17E-16 |
| ENSG00000262539.1  | 17_43740565_G_T_b37 | rs1724409_AC005829.2  | TRANS | N | -597407 | PUTAMEN               | 60  | 75  | 0.338 | -1.013 | 0.094 | 6.57E-18 | 3.89E-16 |
| ENSG00000262539.1  | 17_43740565_G_T_b37 | rs1724409_AC005829.2  | TRANS | N | -597407 | CEREBELLAR.HEMISPHERE | 64  | 80  | 0.320 | -0.989 | 0.097 | 3.23E-17 | 1.73E-15 |
| ENSG00000262539.1  | 17_43740565_G_T_b37 | rs1724409_AC005829.2  | TRANS | N | -597407 | CINGULATE             | 54  | 66  | 0.303 | -0.965 | 0.103 | 8.66E-15 | 3.15E-13 |
| ENSG00000262539.1  | 17_43740565_G_T_b37 | rs1724409_AC005829.2  | TRANS | N | -597407 | FRONTAL.CORTEX        | 66  | 82  | 0.347 | -0.891 | 0.104 | 1.50E-13 | 4.26E-12 |
| ENSG00000262539.1  | 17_43740565_G_T_b37 | rs1724409_AC005829.2  | TRANS | N | -597407 | HIPPOCAMPUS           | 63  | 77  | 0.347 | -0.874 | 0.102 | 3.50E-13 | 9.66E-12 |
| ENSG00000262539.1  | 17_43740565_G_T_b37 | rs1724409_AC005829.2  | TRANS | N | -597407 | HYPOTHALAMUS          | 59  | 72  | 0.333 | -0.959 | 0.113 | 5.02E-13 | 1.35E-11 |
| ENSG00000262539.1  | 17_43740565_G_T_b37 | rs1724409_AC005829.2  | TRANS | N | -597407 | AMYGDALA              | 48  | 61  | 0.347 | -0.894 | 0.103 | 1.77E-12 | 4.37E-11 |
| ENSG00000262539.1  | 17_43740565_G_T_b37 | rs1724409_AC005829.2  | TRANS | N | -597407 | SPINAL.CORD           | 42  | 51  | 0.307 | -1.057 | 0.125 | 6.88E-12 | 1.58E-10 |
| ENSG00000262539.1  | 17_43740565_G_T_b37 | rs1724409_AC005829.2  | TRANS | N | -597407 | SUBSTANTIA.NIGRA      | 40  | 47  | 0.294 | -1.013 | 0.157 | 2.58E-08 | 4.45E-07 |
| ENSG00000233175.2  | 17_43740565_G_T_b37 | rs1724409_AC008105.1  | TRANS | N | 421464  | CEREBELLUM            | 82  | 102 | 0.331 | 0.245  | 0.067 | 3.62E-04 | 0.004    |
| ENSG00000233175.2  | 17_43740565_G_T_b37 | rs1724409_AC008105.1  | TRANS | N | 421464  | SUBSTANTIA.NIGRA      | 40  | 47  | 0.294 | 0.322  | 0.087 | 4.48E-04 | 0.005    |
| ENSG00000233175.2  | 17_43740565_G_T_b37 | rs1724409_AC008105.1  | TRANS | N | 421464  | CORTEX                | 72  | 89  | 0.327 | 0.333  | 0.098 | 8.81E-04 | 0.010    |
| ENSG00000267121.1  | 17_43740565_G_T_b37 | rs1724409_AC008105.3  | TRANS | N | 441410  | CEREBELLUM            | 82  | 102 | 0.331 | 0.440  | 0.081 | 2.82E-07 | 4.56E-06 |
| ENSG00000267121.1  | 17_43740565_G_T_b37 | rs1724409_AC008105.3  | TRANS | N | 441410  | CEREBELLAR.HEMISPHERE | 64  | 80  | 0.320 | 0.417  | 0.096 | 3.20E-05 | 4.43E-04 |
| ENSG00000267334.1  | 17_43740565_G_T_b37 | rs1724409_AC015936.1  | TRANS | N | 715285  | SPINAL.CORD           | 42  | 51  | 0.307 | -0.603 | 0.167 | 6.09E-04 | 0.007    |
| ENSG00000131484.3  | 17_43740565_G_T_b37 | rs1724409_AC091132.1  | TRANS | N | 159939  | CEREBELLUM            | 82  | 102 | 0.331 | 0.750  | 0.099 | 1.01E-11 | 2.26E-10 |
| ENSG00000131484.3  | 17_43740565_G_T_b37 | rs1724409_AC091132.1  | TRANS | N | 159939  | CEREBELLAR.HEMISPHERE | 64  | 80  | 0.320 | 0.674  | 0.111 | 2.17E-08 | 3.76E-07 |
| ENSG00000236234.1  | 17_43740565_G_T_b37 | rs1724409_AC091132.2  | TRANS | N | 210355  | CEREBELLUM            | 82  | 102 | 0.331 | 0.562  | 0.093 | 1.90E-08 | 3.30E-07 |
| ENSG00000236234.1  | 17_43740565_G_T_b37 | rs1724409_AC091132.2  | TRANS | N | 210355  | CEREBELLAR.HEMISPHERE | 64  | 80  | 0.320 | 0.435  | 0.107 | 8.77E-05 | 0.001    |
| ENSG00000266918.1  | 17_43740565_G_T_b37 | rs1724409_AC091132.3  | TRANS | N | 131622  | CEREBELLAR.HEMISPHERE | 64  | 80  | 0.320 | -0.753 | 0.103 | 6.49E-11 | 1.32E-09 |
| ENSG00000266918.1  | 17_43740565_G_T_b37 | rs1724409_AC091132.3  | TRANS | N | 131622  | CEREBELLUM            | 82  | 102 | 0.331 | -0.585 | 0.099 | 3.73E-08 | 6.39E-07 |
| ENSG00000266918.1  | 17_43740565_G_T_b37 | rs1724409_AC091132.3  | TRANS | N | 131622  | CORTEX                | 72  | 89  | 0.327 | -0.443 | 0.109 | 8.96E-05 | 0.001    |
| ENSG00000266918.1  | 17_43740565_G_T_b37 | rs1724409_AC091132.3  | TRANS | N | 131622  | CAUDATE               | 76  | 92  | 0.319 | -0.405 | 0.115 | 6.27E-04 | 0.007    |
| ENSG00000266918.1  | 17_43740565_G_T_b37 | rs1724409_AC091132.3  | TRANS | N | 131622  | AMYGDALA              | 48  | 61  | 0.347 | -0.460 | 0.141 | 0.002    | 0.019    |
| ENSG00000266918.1  | 17_43740565_G_T_b37 | rs1724409_AC091132.3  | TRANS | N | 131622  | NUCLEUS.ACCUMBENS     | 74  | 91  | 0.350 | -0.389 | 0.122 | 0.002    | 0.021    |
| ENSG00000266918.1  | 17_43740565_G_T_b37 | rs1724409_AC091132.3  | TRANS | N | 131622  | CINGULATE             | 54  | 66  | 0.303 | -0.379 | 0.120 | 0.002    | 0.024    |

|                    |                     |                      |       |   |         |                       |    |     |       |        |       |          |          |
|--------------------|---------------------|----------------------|-------|---|---------|-----------------------|----|-----|-------|--------|-------|----------|----------|
| ENSG00000266918.1  | 17_43740565_G_T_b37 | rs1724409_AC091132.3 | TRANS | N | 131622  | FRONTAL.CORTEX        | 66 | 82  | 0.347 | -0.362 | 0.124 | 0.004    | 0.044    |
| ENSG00000266918.1  | 17_43740565_G_T_b37 | rs1724409_AC091132.3 | TRANS | N | 131622  | PUTAMEN               | 60 | 75  | 0.338 | -0.356 | 0.124 | 0.005    | 0.049    |
| ENSG00000181513.10 | 17_43740565_G_T_b37 | rs1724409_ACB4       | TRANS | Y | 530598  | CEREBELLUM            | 82 | 102 | 0.331 | 0.194  | 0.053 | 3.68E-04 | 0.005    |
| ENSG00000159314.7  | 17_43740565_G_T_b37 | rs1724409_ARHGAP27   | TRANS | Y | 228778  | NUCLEUS.ACCUMBENS     | 74 | 91  | 0.350 | -0.379 | 0.075 | 1.95E-06 | 2.96E-05 |
| ENSG00000159314.7  | 17_43740565_G_T_b37 | rs1724409_ARHGAP27   | TRANS | Y | 228778  | CAUDATE               | 76 | 92  | 0.319 | -0.193 | 0.051 | 2.23E-04 | 0.003    |
| ENSG00000159314.7  | 17_43740565_G_T_b37 | rs1724409_ARHGAP27   | TRANS | Y | 228778  | CORTEX                | 72 | 89  | 0.327 | -0.276 | 0.087 | 0.002    | 0.021    |
| ENSG00000185829.11 | 17_43740565_G_T_b37 | rs1724409_ARL17A     | TRANS | Y | -916523 | CEREBELLUM            | 82 | 102 | 0.331 | -1.002 | 0.077 | 1.87E-24 | 4.60E-22 |
| ENSG00000185829.11 | 17_43740565_G_T_b37 | rs1724409_ARL17A     | TRANS | Y | -916523 | CEREBELLAR.HEMISPHERE | 64 | 80  | 0.320 | -1.064 | 0.081 | 8.53E-24 | 1.61E-21 |
| ENSG00000185829.11 | 17_43740565_G_T_b37 | rs1724409_ARL17A     | TRANS | Y | -916523 | CORTEX                | 72 | 89  | 0.327 | -0.980 | 0.090 | 2.51E-19 | 1.84E-17 |
| ENSG00000185829.11 | 17_43740565_G_T_b37 | rs1724409_ARL17A     | TRANS | Y | -916523 | FRONTAL.CORTEX        | 66 | 82  | 0.347 | -1.034 | 0.099 | 1.39E-17 | 7.68E-16 |
| ENSG00000185829.11 | 17_43740565_G_T_b37 | rs1724409_ARL17A     | TRANS | Y | -916523 | NUCLEUS.ACCUMBENS     | 74 | 91  | 0.350 | -0.938 | 0.097 | 2.93E-16 | 1.33E-14 |
| ENSG00000185829.11 | 17_43740565_G_T_b37 | rs1724409_ARL17A     | TRANS | Y | -916523 | HYPOTHALAMUS          | 59 | 72  | 0.333 | -1.061 | 0.120 | 1.15E-13 | 3.31E-12 |
| ENSG00000185829.11 | 17_43740565_G_T_b37 | rs1724409_ARL17A     | TRANS | Y | -916523 | CAUDATE               | 76 | 92  | 0.319 | -0.724 | 0.096 | 1.01E-11 | 2.26E-10 |
| ENSG00000185829.11 | 17_43740565_G_T_b37 | rs1724409_ARL17A     | TRANS | Y | -916523 | CINGULATE             | 54 | 66  | 0.303 | -0.861 | 0.116 | 6.59E-11 | 1.33E-09 |
| ENSG00000185829.11 | 17_43740565_G_T_b37 | rs1724409_ARL17A     | TRANS | Y | -916523 | PUTAMEN               | 60 | 75  | 0.338 | -0.758 | 0.106 | 2.24E-10 | 4.37E-09 |
| ENSG00000185829.11 | 17_43740565_G_T_b37 | rs1724409_ARL17A     | TRANS | Y | -916523 | AMYGDALA              | 48 | 61  | 0.347 | -0.859 | 0.122 | 1.39E-09 | 2.59E-08 |
| ENSG00000185829.11 | 17_43740565_G_T_b37 | rs1724409_ARL17A     | TRANS | Y | -916523 | HIPPOCAMPUS           | 63 | 77  | 0.347 | -0.586 | 0.114 | 1.54E-06 | 2.37E-05 |
| ENSG00000185829.11 | 17_43740565_G_T_b37 | rs1724409_ARL17A     | TRANS | Y | -916523 | SPINAL.CORD           | 42 | 51  | 0.307 | -0.545 | 0.146 | 4.32E-04 | 0.005    |
| ENSG00000120088.10 | 17_43740565_G_T_b37 | rs1724409_CRHR1      | TRANS | Y | 41298   | PUTAMEN               | 60 | 75  | 0.338 | 0.361  | 0.093 | 2.15E-04 | 0.003    |
| ENSG00000120088.10 | 17_43740565_G_T_b37 | rs1724409_CRHR1      | TRANS | Y | 41298   | HIPPOCAMPUS           | 63 | 77  | 0.347 | 0.245  | 0.072 | 9.55E-04 | 0.011    |
| ENSG00000120088.10 | 17_43740565_G_T_b37 | rs1724409_CRHR1      | TRANS | Y | 41298   | NUCLEUS.ACCUMBENS     | 74 | 91  | 0.350 | 0.235  | 0.079 | 0.004    | 0.037    |
| ENSG00000120088.10 | 17_43740565_G_T_b37 | rs1724409_CRHR1      | TRANS | Y | 41298   | FRONTAL.CORTEX        | 66 | 82  | 0.347 | -0.148 | 0.051 | 0.005    | 0.045    |
| ENSG00000120088.10 | 17_43740565_G_T_b37 | rs1724409_CRHR1      | TRANS | Y | 41298   | SPINAL.CORD           | 42 | 51  | 0.307 | 0.276  | 0.094 | 0.005    | 0.045    |
| ENSG00000264070.1  | 17_43740565_G_T_b37 | rs1724409_DND1P1     | TRANS | N | 77328   | CORTEX                | 72 | 89  | 0.327 | -0.979 | 0.091 | 4.25E-19 | 2.94E-17 |
| ENSG00000264070.1  | 17_43740565_G_T_b37 | rs1724409_DND1P1     | TRANS | N | 77328   | PUTAMEN               | 60 | 75  | 0.338 | -0.866 | 0.103 | 5.66E-13 | 1.50E-11 |
| ENSG00000264070.1  | 17_43740565_G_T_b37 | rs1724409_DND1P1     | TRANS | N | 77328   | CAUDATE               | 76 | 92  | 0.319 | -0.766 | 0.095 | 7.27E-13 | 1.89E-11 |
| ENSG00000264070.1  | 17_43740565_G_T_b37 | rs1724409_DND1P1     | TRANS | N | 77328   | CINGULATE             | 54 | 66  | 0.303 | -0.922 | 0.114 | 3.45E-12 | 8.23E-11 |
| ENSG00000264070.1  | 17_43740565_G_T_b37 | rs1724409_DND1P1     | TRANS | N | 77328   | FRONTAL.CORTEX        | 66 | 82  | 0.347 | -0.829 | 0.104 | 3.47E-12 | 8.24E-11 |
| ENSG00000264070.1  | 17_43740565_G_T_b37 | rs1724409_DND1P1     | TRANS | N | 77328   | HYPOTHALAMUS          | 59 | 72  | 0.333 | -0.916 | 0.115 | 6.60E-12 | 1.52E-10 |
| ENSG00000264070.1  | 17_43740565_G_T_b37 | rs1724409_DND1P1     | TRANS | N | 77328   | HIPPOCAMPUS           | 63 | 77  | 0.347 | -0.801 | 0.107 | 5.24E-11 | 1.08E-09 |
| ENSG00000264070.1  | 17_43740565_G_T_b37 | rs1724409_DND1P1     | TRANS | N | 77328   | NUCLEUS.ACCUMBENS     | 74 | 91  | 0.350 | -0.793 | 0.110 | 7.04E-11 | 1.42E-09 |
| ENSG00000264070.1  | 17_43740565_G_T_b37 | rs1724409_DND1P1     | TRANS | N | 77328   | SPINAL.CORD           | 42 | 51  | 0.307 | -0.958 | 0.128 | 3.54E-10 | 6.82E-09 |
| ENSG00000264070.1  | 17_43740565_G_T_b37 | rs1724409_DND1P1     | TRANS | N | 77328   | CEREBELLUM            | 82 | 102 | 0.331 | -0.538 | 0.081 | 1.14E-09 | 2.14E-08 |
| ENSG00000264070.1  | 17_43740565_G_T_b37 | rs1724409_DND1P1     | TRANS | N | 77328   | CEREBELLAR.HEMISPHERE | 64 | 80  | 0.320 | -0.639 | 0.096 | 1.48E-09 | 2.74E-08 |
| ENSG00000264070.1  | 17_43740565_G_T_b37 | rs1724409_DND1P1     | TRANS | N | 77328   | AMYGDALA              | 48 | 61  | 0.347 | -0.672 | 0.096 | 1.66E-09 | 3.06E-08 |
| ENSG00000264070.1  | 17_43740565_G_T_b37 | rs1724409_DND1P1     | TRANS | N | 77328   | SUBSTANTIA.NIGRA      | 40 | 47  | 0.294 | -0.902 | 0.164 | 9.57E-07 | 1.49E-05 |
| ENSG00000232300.1  | 17_43740565_G_T_b37 | rs1724409_FAM215B    | TRANS | N | -899596 | CEREBELLUM            | 82 | 102 | 0.331 | -0.759 | 0.087 | 1.74E-14 | 5.94E-13 |
| ENSG00000232300.1  | 17_43740565_G_T_b37 | rs1724409_FAM215B    | TRANS | N | -899596 | CEREBELLAR.HEMISPHERE | 64 | 80  | 0.320 | -0.719 | 0.114 | 6.46E-09 | 1.16E-07 |
| ENSG00000232300.1  | 17_43740565_G_T_b37 | rs1724409_FAM215B    | TRANS | N | -899596 | NUCLEUS.ACCUMBENS     | 74 | 91  | 0.350 | -0.703 | 0.115 | 1.56E-08 | 2.72E-07 |
| ENSG00000232300.1  | 17_43740565_G_T_b37 | rs1724409_FAM215B    | TRANS | N | -899596 | HYPOTHALAMUS          | 59 | 72  | 0.333 | -0.512 | 0.145 | 6.89E-04 | 0.008    |
| ENSG00000184922.9  | 17_43740565_G_T_b37 | rs1724409_FMN1       | TRANS | Y | 440975  | CEREBELLUM            | 82 | 102 | 0.331 | 0.609  | 0.070 | 2.91E-14 | 9.23E-13 |
| ENSG00000184922.9  | 17_43740565_G_T_b37 | rs1724409_FMN1       | TRANS | Y | 440975  | CEREBELLAR.HEMISPHERE | 64 | 80  | 0.320 | 0.572  | 0.078 | 6.28E-11 | 1.28E-09 |
| ENSG00000184922.9  | 17_43740565_G_T_b37 | rs1724409_FMN1       | TRANS | Y | 440975  | FRONTAL.CORTEX        | 66 | 82  | 0.347 | -0.184 | 0.059 | 0.002    | 0.024    |
| ENSG00000120071.8  | 17_43740565_G_T_b37 | rs1724409_KANSL1     | TRANS | Y | -562168 | CEREBELLUM            | 82 | 102 | 0.331 | -0.401 | 0.082 | 2.94E-06 | 4.45E-05 |
| ENSG00000120071.8  | 17_43740565_G_T_b37 | rs1724409_KANSL1     | TRANS | Y | -562168 | CAUDATE               | 76 | 92  | 0.319 | -0.296 | 0.073 | 9.03E-05 | 0.001    |
| ENSG00000120071.8  | 17_43740565_G_T_b37 | rs1724409_KANSL1     | TRANS | Y | -562168 | CEREBELLAR.HEMISPHERE | 64 | 80  | 0.320 | -0.321 | 0.084 | 2.40E-04 | 0.003    |
| ENSG00000120071.8  | 17_43740565_G_T_b37 | rs1724409_KANSL1     | TRANS | Y | -562168 | CINGULATE             | 54 | 66  | 0.303 | -0.318 | 0.101 | 0.002    | 0.024    |
| ENSG00000214401.4  | 17_43740565_G_T_b37 | rs1724409_KANSL1-AS1 | TRANS | N | -530377 | CEREBELLUM            | 82 | 102 | 0.331 | -1.028 | 0.076 | 1.20E-25 | 3.28E-23 |
| ENSG00000214401.4  | 17_43740565_G_T_b37 | rs1724409_KANSL1-AS1 | TRANS | N | -530377 | CORTEX                | 72 | 89  | 0.327 | -0.980 | 0.075 | 3.26E-24 | 7.28E-22 |
| ENSG00000214401.4  | 17_43740565_G_T_b37 | rs1724409_KANSL1-AS1 | TRANS | N | -530377 | CAUDATE               | 76 | 92  | 0.319 | -0.964 | 0.084 | 4.10E-21 | 4.29E-19 |
| ENSG00000214401.4  | 17_43740565_G_T_b37 | rs1724409_KANSL1-AS1 | TRANS | N | -530377 | NUCLEUS.ACCUMBENS     | 74 | 91  | 0.350 | -0.876 | 0.080 | 3.96E-19 | 2.82E-17 |
| ENSG00000214401.4  | 17_43740565_G_T_b37 | rs1724409_KANSL1-AS1 | TRANS | N | -530377 | PUTAMEN               | 60 | 75  | 0.338 | -0.970 | 0.088 | 2.97E-18 | 1.92E-16 |
| ENSG00000214401.4  | 17_43740565_G_T_b37 | rs1724409_KANSL1-AS1 | TRANS | N | -530377 | CINGULATE             | 54 | 66  | 0.303 | -0.904 | 0.083 | 7.15E-18 | 4.11E-16 |
| ENSG00000214401.4  | 17_43740565_G_T_b37 | rs1724409_KANSL1-AS1 | TRANS | N | -530377 | CEREBELLAR.HEMISPHERE | 64 | 80  | 0.320 | -0.854 | 0.082 | 7.33E-18 | 4.14E-16 |
| ENSG00000214401.4  | 17_43740565_G_T_b37 | rs1724409_KANSL1-AS1 | TRANS | N | -530377 | FRONTAL.CORTEX        | 66 | 82  | 0.347 | -0.884 | 0.087 | 8.89E-17 | 4.33E-15 |
| ENSG00000214401.4  | 17_43740565_G_T_b37 | rs1724409_KANSL1-AS1 | TRANS | N | -530377 | HIPPOCAMPUS           | 63 | 77  | 0.347 | -0.979 | 0.097 | 1.76E-16 | 8.16E-15 |
| ENSG00000214401.4  | 17_43740565_G_T_b37 | rs1724409_KANSL1-AS1 | TRANS | N | -530377 | HYPOTHALAMUS          | 59 | 72  | 0.333 | -0.997 | 0.105 | 4.28E-15 | 1.59E-13 |
| ENSG00000214401.4  | 17_43740565_G_T_b37 | rs1724409_KANSL1-AS1 | TRANS | N | -530377 | SUBSTANTIA.NIGRA      | 40 | 47  | 0.294 | -0.997 | 0.108 | 4.93E-13 | 1.33E-11 |
| ENSG00000214401.4  | 17_43740565_G_T_b37 | rs1724409_KANSL1-AS1 | TRANS | N | -530377 | AMYGDALA              | 48 | 61  | 0.347 | -0.773 | 0.090 | 2.23E-12 | 5.45E-11 |
| ENSG00000214401.4  | 17_43740565_G_T_b37 | rs1724409_KANSL1-AS1 | TRANS | N | -530377 | SPINAL.CORD           | 42 | 51  | 0.307 | -0.943 | 0.110 | 5.13E-12 | 1.20E-10 |
| ENSG00000204650.9  | 17_43740565_G_T_b37 | rs1724409_LINC02210  | TRANS | N | 42871   | CORTEX                | 72 | 89  | 0.327 | -0.529 | 0.060 | 1.24E-14 | 4.35E-13 |

|                    |                     |                      |       |   |         |                       |    |     |       |        |       |          |          |
|--------------------|---------------------|----------------------|-------|---|---------|-----------------------|----|-----|-------|--------|-------|----------|----------|
| ENSG00000204650.9  | 17_43740565_G_T_b37 | rs1724409_LINC02210  | TRANS | N | 42871   | CAUDATE               | 76 | 92  | 0.319 | -0.639 | 0.075 | 4.23E-14 | 1.30E-12 |
| ENSG00000204650.9  | 17_43740565_G_T_b37 | rs1724409_LINC02210  | TRANS | N | 42871   | PUTAMEN               | 60 | 75  | 0.338 | -0.648 | 0.073 | 6.00E-14 | 1.78E-12 |
| ENSG00000204650.9  | 17_43740565_G_T_b37 | rs1724409_LINC02210  | TRANS | N | 42871   | CINGULATE             | 54 | 66  | 0.303 | -0.604 | 0.072 | 7.87E-13 | 2.03E-11 |
| ENSG00000204650.9  | 17_43740565_G_T_b37 | rs1724409_LINC02210  | TRANS | N | 42871   | SPINAL.CORD           | 42 | 51  | 0.307 | -0.894 | 0.104 | 4.12E-12 | 9.47E-11 |
| ENSG00000204650.9  | 17_43740565_G_T_b37 | rs1724409_LINC02210  | TRANS | N | 42871   | NUCLEUS.ACCUMBENS     | 74 | 91  | 0.350 | -0.502 | 0.065 | 7.39E-12 | 1.69E-10 |
| ENSG00000204650.9  | 17_43740565_G_T_b37 | rs1724409_LINC02210  | TRANS | N | 42871   | HIPPOCAMPUS           | 63 | 77  | 0.347 | -0.620 | 0.081 | 1.81E-11 | 3.94E-10 |
| ENSG00000204650.9  | 17_43740565_G_T_b37 | rs1724409_LINC02210  | TRANS | N | 42871   | AMYGDALA              | 48 | 61  | 0.347 | -0.710 | 0.088 | 2.17E-11 | 4.68E-10 |
| ENSG00000204650.9  | 17_43740565_G_T_b37 | rs1724409_LINC02210  | TRANS | N | 42871   | CEREBELLUM            | 82 | 102 | 0.331 | -0.473 | 0.070 | 6.22E-10 | 1.18E-08 |
| ENSG00000204650.9  | 17_43740565_G_T_b37 | rs1724409_LINC02210  | TRANS | N | 42871   | FRONTAL.CORTEX        | 66 | 82  | 0.347 | -0.396 | 0.059 | 1.50E-09 | 2.77E-08 |
| ENSG00000204650.9  | 17_43740565_G_T_b37 | rs1724409_LINC02210  | TRANS | N | 42871   | HYPOTHALAMUS          | 59 | 72  | 0.333 | -0.613 | 0.094 | 5.28E-09 | 9.54E-08 |
| ENSG00000204650.9  | 17_43740565_G_T_b37 | rs1724409_LINC02210  | TRANS | N | 42871   | SUBSTANTIA.NIGRA      | 40 | 47  | 0.294 | -0.604 | 0.127 | 1.40E-05 | 1.99E-04 |
| ENSG00000204650.9  | 17_43740565_G_T_b37 | rs1724409_LINC02210  | TRANS | N | 42871   | CEREBELLAR.HEMISPHERE | 64 | 80  | 0.320 | -0.289 | 0.065 | 2.42E-05 | 3.39E-04 |
| ENSG00000176681.10 | 17_43740565_G_T_b37 | rs1724409_LRRC37A    | TRANS | Y | -629534 | CEREBELLUM            | 82 | 102 | 0.331 | -0.837 | 0.096 | 1.88E-14 | 6.29E-13 |
| ENSG00000176681.10 | 17_43740565_G_T_b37 | rs1724409_LRRC37A    | TRANS | Y | -629534 | CEREBELLAR.HEMISPHERE | 64 | 80  | 0.320 | -0.829 | 0.106 | 4.83E-12 | 1.14E-10 |
| ENSG00000176681.10 | 17_43740565_G_T_b37 | rs1724409_LRRC37A    | TRANS | Y | -629534 | HYPOTHALAMUS          | 59 | 72  | 0.333 | -0.695 | 0.153 | 1.70E-05 | 2.41E-04 |
| ENSG00000176681.10 | 17_43740565_G_T_b37 | rs1724409_LRRC37A    | TRANS | Y | -629534 | CORTEX                | 72 | 89  | 0.327 | -0.490 | 0.113 | 3.27E-05 | 4.51E-04 |
| ENSG00000176681.10 | 17_43740565_G_T_b37 | rs1724409_LRRC37A    | TRANS | Y | -629534 | SPINAL.CORD           | 42 | 51  | 0.307 | -0.720 | 0.162 | 3.70E-05 | 5.05E-04 |
| ENSG00000176681.10 | 17_43740565_G_T_b37 | rs1724409_LRRC37A    | TRANS | Y | -629534 | FRONTAL.CORTEX        | 66 | 82  | 0.347 | -0.515 | 0.127 | 1.02E-04 | 0.001    |
| ENSG00000176681.10 | 17_43740565_G_T_b37 | rs1724409_LRRC37A    | TRANS | Y | -629534 | CAUDATE               | 76 | 92  | 0.319 | -0.445 | 0.119 | 2.75E-04 | 0.003    |
| ENSG00000176681.10 | 17_43740565_G_T_b37 | rs1724409_LRRC37A    | TRANS | Y | -629534 | AMYGDALA              | 48 | 61  | 0.347 | -0.553 | 0.149 | 4.31E-04 | 0.005    |
| ENSG00000176681.10 | 17_43740565_G_T_b37 | rs1724409_LRRC37A    | TRANS | Y | -629534 | PUTAMEN               | 60 | 75  | 0.338 | -0.486 | 0.134 | 4.63E-04 | 0.006    |
| ENSG00000176681.10 | 17_43740565_G_T_b37 | rs1724409_LRRC37A    | TRANS | Y | -629534 | HIPPOCAMPUS           | 63 | 77  | 0.347 | -0.440 | 0.128 | 9.19E-04 | 0.011    |
| ENSG00000176681.10 | 17_43740565_G_T_b37 | rs1724409_LRRC37A    | TRANS | Y | -629534 | CINGULATE             | 54 | 66  | 0.303 | -0.446 | 0.133 | 0.001    | 0.013    |
| ENSG00000176681.10 | 17_43740565_G_T_b37 | rs1724409_LRRC37A    | TRANS | Y | -629534 | NUCLEUS.ACCUMBENS     | 74 | 91  | 0.350 | -0.406 | 0.125 | 0.002    | 0.017    |
| ENSG00000238083.3  | 17_43740565_G_T_b37 | rs1724409_LRRC37A2   | TRANS | Y | -848312 | CEREBELLUM            | 82 | 102 | 0.331 | -1.034 | 0.068 | 1.18E-29 | 7.37E-27 |
| ENSG00000238083.3  | 17_43740565_G_T_b37 | rs1724409_LRRC37A2   | TRANS | Y | -848312 | CEREBELLAR.HEMISPHERE | 64 | 80  | 0.320 | -1.093 | 0.083 | 1.16E-23 | 2.04E-21 |
| ENSG00000238083.3  | 17_43740565_G_T_b37 | rs1724409_LRRC37A2   | TRANS | Y | -848312 | CORTEX                | 72 | 89  | 0.327 | -0.953 | 0.084 | 1.71E-20 | 1.55E-18 |
| ENSG00000238083.3  | 17_43740565_G_T_b37 | rs1724409_LRRC37A2   | TRANS | Y | -848312 | CAUDATE               | 76 | 92  | 0.319 | -0.905 | 0.086 | 8.01E-19 | 5.39E-17 |
| ENSG00000238083.3  | 17_43740565_G_T_b37 | rs1724409_LRRC37A2   | TRANS | Y | -848312 | NUCLEUS.ACCUMBENS     | 74 | 91  | 0.350 | -0.920 | 0.094 | 1.39E-16 | 6.57E-15 |
| ENSG00000238083.3  | 17_43740565_G_T_b37 | rs1724409_LRRC37A2   | TRANS | Y | -848312 | CINGULATE             | 54 | 66  | 0.303 | -1.021 | 0.104 | 7.90E-16 | 3.35E-14 |
| ENSG00000238083.3  | 17_43740565_G_T_b37 | rs1724409_LRRC37A2   | TRANS | Y | -848312 | HIPPOCAMPUS           | 63 | 77  | 0.347 | -0.913 | 0.094 | 1.31E-15 | 5.41E-14 |
| ENSG00000238083.3  | 17_43740565_G_T_b37 | rs1724409_LRRC37A2   | TRANS | Y | -848312 | PUTAMEN               | 60 | 75  | 0.338 | -0.952 | 0.099 | 1.63E-15 | 6.50E-14 |
| ENSG00000238083.3  | 17_43740565_G_T_b37 | rs1724409_LRRC37A2   | TRANS | Y | -848312 | HYPOTHALAMUS          | 59 | 72  | 0.333 | -1.088 | 0.113 | 2.41E-15 | 9.33E-14 |
| ENSG00000238083.3  | 17_43740565_G_T_b37 | rs1724409_LRRC37A2   | TRANS | Y | -848312 | FRONTAL.CORTEX        | 66 | 82  | 0.347 | -0.917 | 0.099 | 6.67E-15 | 2.45E-13 |
| ENSG00000238083.3  | 17_43740565_G_T_b37 | rs1724409_LRRC37A2   | TRANS | Y | -848312 | SPINAL.CORD           | 42 | 51  | 0.307 | -1.097 | 0.108 | 1.01E-14 | 3.60E-13 |
| ENSG00000238083.3  | 17_43740565_G_T_b37 | rs1724409_LRRC37A2   | TRANS | Y | -848312 | AMYGDALA              | 48 | 61  | 0.347 | -0.930 | 0.097 | 4.34E-14 | 1.32E-12 |
| ENSG00000238083.3  | 17_43740565_G_T_b37 | rs1724409_LRRC37A2   | TRANS | Y | -848312 | SUBSTANTIA.NIGRA      | 40 | 47  | 0.294 | -0.826 | 0.133 | 6.66E-08 | 1.12E-06 |
| ENSG00000214425.2  | 17_43740565_G_T_b37 | rs1724409_LRRC37A4P  | TRANS | N | 112864  | CEREBELLUM            | 82 | 102 | 0.331 | 0.947  | 0.074 | 5.95E-24 | 1.22E-21 |
| ENSG00000214425.2  | 17_43740565_G_T_b37 | rs1724409_LRRC37A4P  | TRANS | N | 112864  | CAUDATE               | 76 | 92  | 0.319 | 0.863  | 0.071 | 7.44E-23 | 1.11E-20 |
| ENSG00000214425.2  | 17_43740565_G_T_b37 | rs1724409_LRRC37A4P  | TRANS | N | 112864  | CORTEX                | 72 | 89  | 0.327 | 0.907  | 0.075 | 4.05E-22 | 5.38E-20 |
| ENSG00000214425.2  | 17_43740565_G_T_b37 | rs1724409_LRRC37A4P  | TRANS | N | 112864  | CEREBELLAR.HEMISPHERE | 64 | 80  | 0.320 | 0.898  | 0.073 | 5.95E-22 | 7.31E-20 |
| ENSG00000214425.2  | 17_43740565_G_T_b37 | rs1724409_LRRC37A4P  | TRANS | N | 112864  | NUCLEUS.ACCUMBENS     | 74 | 91  | 0.350 | 0.873  | 0.076 | 2.88E-20 | 2.44E-18 |
| ENSG00000214425.2  | 17_43740565_G_T_b37 | rs1724409_LRRC37A4P  | TRANS | N | 112864  | CINGULATE             | 54 | 66  | 0.303 | 1.037  | 0.088 | 9.88E-20 | 7.83E-18 |
| ENSG00000214425.2  | 17_43740565_G_T_b37 | rs1724409_LRRC37A4P  | TRANS | N | 112864  | FRONTAL.CORTEX        | 66 | 82  | 0.347 | 0.891  | 0.082 | 1.99E-18 | 1.30E-16 |
| ENSG00000214425.2  | 17_43740565_G_T_b37 | rs1724409_LRRC37A4P  | TRANS | N | 112864  | HYPOTHALAMUS          | 59 | 72  | 0.333 | 0.999  | 0.091 | 6.46E-18 | 3.87E-16 |
| ENSG00000214425.2  | 17_43740565_G_T_b37 | rs1724409_LRRC37A4P  | TRANS | N | 112864  | PUTAMEN               | 60 | 75  | 0.338 | 0.997  | 0.092 | 7.69E-18 | 4.30E-16 |
| ENSG00000214425.2  | 17_43740565_G_T_b37 | rs1724409_LRRC37A4P  | TRANS | N | 112864  | HIPPOCAMPUS           | 63 | 77  | 0.347 | 0.885  | 0.094 | 4.47E-15 | 1.65E-13 |
| ENSG00000214425.2  | 17_43740565_G_T_b37 | rs1724409_LRRC37A4P  | TRANS | N | 112864  | SPINAL.CORD           | 42 | 51  | 0.307 | 1.137  | 0.116 | 4.30E-14 | 1.31E-12 |
| ENSG00000214425.2  | 17_43740565_G_T_b37 | rs1724409_LRRC37A4P  | TRANS | N | 112864  | AMYGDALA              | 48 | 61  | 0.347 | 0.887  | 0.103 | 2.41E-12 | 5.86E-11 |
| ENSG00000214425.2  | 17_43740565_G_T_b37 | rs1724409_LRRC37A4P  | TRANS | N | 112864  | SUBSTANTIA.NIGRA      | 40 | 47  | 0.294 | 0.854  | 0.148 | 3.25E-07 | 5.22E-06 |
| ENSG00000262500.1  | 17_43740565_G_T_b37 | rs1724409_MAPK8IP1P1 | TRANS | N | -580407 | CEREBELLAR.HEMISPHERE | 64 | 80  | 0.320 | -0.954 | 0.087 | 6.95E-19 | 4.74E-17 |
| ENSG00000262500.1  | 17_43740565_G_T_b37 | rs1724409_MAPK8IP1P1 | TRANS | N | -580407 | CORTEX                | 72 | 89  | 0.327 | -0.973 | 0.095 | 6.14E-18 | 3.73E-16 |
| ENSG00000262500.1  | 17_43740565_G_T_b37 | rs1724409_MAPK8IP1P1 | TRANS | N | -580407 | CEREBELLUM            | 82 | 102 | 0.331 | -0.893 | 0.092 | 9.41E-17 | 4.53E-15 |
| ENSG00000262500.1  | 17_43740565_G_T_b37 | rs1724409_MAPK8IP1P1 | TRANS | N | -580407 | CAUDATE               | 76 | 92  | 0.319 | -0.899 | 0.099 | 2.36E-15 | 9.21E-14 |
| ENSG00000262500.1  | 17_43740565_G_T_b37 | rs1724409_MAPK8IP1P1 | TRANS | N | -580407 | FRONTAL.CORTEX        | 66 | 82  | 0.347 | -0.962 | 0.106 | 1.67E-14 | 5.74E-13 |
| ENSG00000262500.1  | 17_43740565_G_T_b37 | rs1724409_MAPK8IP1P1 | TRANS | N | -580407 | HIPPOCAMPUS           | 63 | 77  | 0.347 | -0.952 | 0.106 | 3.80E-14 | 1.18E-12 |
| ENSG00000262500.1  | 17_43740565_G_T_b37 | rs1724409_MAPK8IP1P1 | TRANS | N | -580407 | NUCLEUS.ACCUMBENS     | 74 | 91  | 0.350 | -0.976 | 0.108 | 1.01E-12 | 2.57E-11 |
| ENSG00000262500.1  | 17_43740565_G_T_b37 | rs1724409_MAPK8IP1P1 | TRANS | N | -580407 | CINGULATE             | 54 | 66  | 0.303 | -0.829 | 0.115 | 2.95E-12 | 7.11E-11 |
| ENSG00000262500.1  | 17_43740565_G_T_b37 | rs1724409_MAPK8IP1P1 | TRANS | N | -580407 | PUTAMEN               | 60 | 75  | 0.338 | -0.862 | 0.117 | 9.45E-11 | 1.89E-09 |
| ENSG00000262500.1  | 17_43740565_G_T_b37 | rs1724409_MAPK8IP1P1 | TRANS | N | -580407 | AMYGDALA              | 48 | 61  | 0.347 | -0.824 | 0.111 | 2.56E-10 | 4.97E-09 |
| ENSG00000262500.1  | 17_43740565_G_T_b37 | rs1724409_MAPK8IP1P1 | TRANS | N | -580407 | HYPOTHALAMUS          | 59 | 72  | 0.333 | -0.850 | 0.121 | 4.79E-10 | 9.16E-09 |

|                    |                     |                      |       |   |         |                       |     |     |       |        |       |          |          |
|--------------------|---------------------|----------------------|-------|---|---------|-----------------------|-----|-----|-------|--------|-------|----------|----------|
| ENSG00000262500.1  | 17_43740565_G_T_b37 | rs1724409_MAPK8IP1P1 | TRANS | N | -580407 | SPINAL.CORD           | 42  | 51  | 0.307 | -0.929 | 0.139 | 8.11E-09 | 1.45E-07 |
| ENSG00000262500.1  | 17_43740565_G_T_b37 | rs1724409_MAPK8IP1P1 | TRANS | N | -580407 | SUBSTANTIA.NIGRA      | 40  | 47  | 0.294 | -1.062 | 0.178 | 1.52E-07 | 2.52E-06 |
| ENSG00000263503.1  | 17_43740565_G_T_b37 | rs1724409_MAPK8IP1P2 | TRANS | N | 60859   | CORTEX                | 72  | 89  | 0.327 | -1.017 | 0.093 | 1.46E-19 | 1.12E-17 |
| ENSG00000263503.1  | 17_43740565_G_T_b37 | rs1724409_MAPK8IP1P2 | TRANS | N | 60859   | CEREBELLUM            | 82  | 102 | 0.331 | -0.911 | 0.088 | 3.58E-18 | 2.29E-16 |
| ENSG00000263503.1  | 17_43740565_G_T_b37 | rs1724409_MAPK8IP1P2 | TRANS | N | 60859   | CINGULATE             | 54  | 66  | 0.303 | -1.010 | 0.101 | 4.99E-16 | 2.17E-14 |
| ENSG00000263503.1  | 17_43740565_G_T_b37 | rs1724409_MAPK8IP1P2 | TRANS | N | 60859   | CEREBELLAR.HEMISPHERE | 64  | 80  | 0.320 | -0.894 | 0.095 | 1.37E-15 | 5.61E-14 |
| ENSG00000263503.1  | 17_43740565_G_T_b37 | rs1724409_MAPK8IP1P2 | TRANS | N | 60859   | FRONTAL.CORTEX        | 66  | 82  | 0.347 | -0.936 | 0.102 | 9.48E-15 | 3.40E-13 |
| ENSG00000263503.1  | 17_43740565_G_T_b37 | rs1724409_MAPK8IP1P2 | TRANS | N | 60859   | PUTAMEN               | 60  | 75  | 0.338 | -0.945 | 0.103 | 1.79E-14 | 6.07E-13 |
| ENSG00000263503.1  | 17_43740565_G_T_b37 | rs1724409_MAPK8IP1P2 | TRANS | N | 60859   | CAUDATE               | 76  | 92  | 0.319 | -0.872 | 0.101 | 3.13E-14 | 9.86E-13 |
| ENSG00000263503.1  | 17_43740565_G_T_b37 | rs1724409_MAPK8IP1P2 | TRANS | N | 60859   | SPINAL.CORD           | 42  | 51  | 0.307 | -1.075 | 0.116 | 2.77E-13 | 7.69E-12 |
| ENSG00000263503.1  | 17_43740565_G_T_b37 | rs1724409_MAPK8IP1P2 | TRANS | N | 60859   | HIPPOCAMPUS           | 63  | 77  | 0.347 | -0.935 | 0.110 | 3.80E-13 | 1.04E-11 |
| ENSG00000263503.1  | 17_43740565_G_T_b37 | rs1724409_MAPK8IP1P2 | TRANS | N | 60859   | HYPOTHALAMUS          | 59  | 72  | 0.333 | -0.987 | 0.124 | 6.51E-12 | 1.51E-10 |
| ENSG00000263503.1  | 17_43740565_G_T_b37 | rs1724409_MAPK8IP1P2 | TRANS | N | 60859   | NUCLEUS.ACCUMBENS     | 74  | 91  | 0.350 | -0.830 | 0.109 | 1.01E-11 | 2.26E-10 |
| ENSG00000263503.1  | 17_43740565_G_T_b37 | rs1724409_MAPK8IP1P2 | TRANS | N | 60859   | AMYGDALA              | 48  | 61  | 0.347 | -0.835 | 0.105 | 3.18E-11 | 6.68E-10 |
| ENSG00000263503.1  | 17_43740565_G_T_b37 | rs1724409_MAPK8IP1P2 | TRANS | N | 60859   | SUBSTANTIA.NIGRA      | 40  | 47  | 0.294 | -1.132 | 0.171 | 1.35E-08 | 2.38E-07 |
| ENSG00000186868.11 | 17_43740565_G_T_b37 | rs1724409_MAPT       | TRANS | Y | -231183 | CEREBELLUM            | 82  | 102 | 0.331 | 0.244  | 0.063 | 1.69E-04 | 0.002    |
| ENSG00000264589.1  | 17_43740565_G_T_b37 | rs1724409_MAPT-AS1   | TRANS | N | -232401 | NUCLEUS.ACCUMBENS     | 74  | 91  | 0.350 | 0.612  | 0.109 | 1.41E-07 | 2.35E-06 |
| ENSG00000264589.1  | 17_43740565_G_T_b37 | rs1724409_MAPT-AS1   | TRANS | N | -232401 | CEREBELLUM            | 82  | 102 | 0.331 | -0.461 | 0.091 | 1.38E-06 | 2.13E-05 |
| ENSG00000264589.1  | 17_43740565_G_T_b37 | rs1724409_MAPT-AS1   | TRANS | N | -232401 | FRONTAL.CORTEX        | 66  | 82  | 0.347 | 0.353  | 0.112 | 0.002    | 0.023    |
| ENSG00000264589.1  | 17_43740565_G_T_b37 | rs1724409_MAPT-AS1   | TRANS | N | -232401 | PUTAMEN               | 60  | 75  | 0.338 | 0.361  | 0.123 | 0.004    | 0.041    |
| ENSG00000264589.1  | 17_43740565_G_T_b37 | rs1724409_MAPT-AS1   | TRANS | N | -232401 | AMYGDALA              | 48  | 61  | 0.347 | 0.278  | 0.095 | 0.005    | 0.046    |
| ENSG00000136448.7  | 17_43740565_G_T_b37 | rs1724409_NMT1       | TRANS | Y | 611535  | CEREBELLUM            | 82  | 102 | 0.331 | 0.170  | 0.054 | 0.002    | 0.024    |
| ENSG00000136448.7  | 17_43740565_G_T_b37 | rs1724409_NMT1       | TRANS | Y | 611535  | CAUDATE               | 76  | 92  | 0.319 | 0.240  | 0.079 | 0.003    | 0.032    |
| ENSG00000136448.7  | 17_43740565_G_T_b37 | rs1724409_NMT1       | TRANS | Y | 611535  | CORTEX                | 72  | 89  | 0.327 | 0.126  | 0.042 | 0.003    | 0.033    |
| ENSG00000136448.7  | 17_43740565_G_T_b37 | rs1724409_NMT1       | TRANS | Y | 611535  | SPINAL.CORD           | 42  | 51  | 0.307 | 0.318  | 0.104 | 0.003    | 0.034    |
| ENSG00000136448.7  | 17_43740565_G_T_b37 | rs1724409_NMT1       | TRANS | Y | 611535  | CEREBELLAR.HEMISPHERE | 64  | 80  | 0.320 | 0.168  | 0.056 | 0.004    | 0.037    |
| ENSG00000073969.14 | 17_43740565_G_T_b37 | rs1724409_NSF        | TRANS | Y | -927470 | CEREBELLUM            | 82  | 102 | 0.331 | 0.183  | 0.039 | 7.23E-06 | 1.05E-04 |
| ENSG00000225190.4  | 17_43740565_G_T_b37 | rs1724409_PLEKHM1    | TRANS | Y | 172450  | CEREBELLUM            | 82  | 102 | 0.331 | 0.848  | 0.063 | 1.49E-25 | 3.85E-23 |
| ENSG00000225190.4  | 17_43740565_G_T_b37 | rs1724409_PLEKHM1    | TRANS | Y | 172450  | CEREBELLAR.HEMISPHERE | 64  | 80  | 0.320 | 0.686  | 0.067 | 2.25E-17 | 1.22E-15 |
| ENSG00000225190.4  | 17_43740565_G_T_b37 | rs1724409_PLEKHM1    | TRANS | Y | 172450  | CORTEX                | 72  | 89  | 0.327 | -0.394 | 0.072 | 2.47E-07 | 4.07E-06 |
| ENSG00000225190.4  | 17_43740565_G_T_b37 | rs1724409_PLEKHM1    | TRANS | Y | 172450  | NUCLEUS.ACCUMBENS     | 74  | 91  | 0.350 | -0.264 | 0.074 | 5.72E-04 | 0.007    |
| ENSG00000225190.4  | 17_43740565_G_T_b37 | rs1724409_PLEKHM1    | TRANS | Y | 172450  | FRONTAL.CORTEX        | 66  | 82  | 0.347 | -0.259 | 0.079 | 0.001    | 0.016    |
| ENSG00000225190.4  | 17_43740565_G_T_b37 | rs1724409_PLEKHM1    | TRANS | Y | 172450  | PUTAMEN               | 60  | 75  | 0.338 | -0.236 | 0.077 | 0.003    | 0.030    |
| ENSG00000204652.5  | 17_43740565_G_T_b37 | rs1724409_RPS26P8    | TRANS | N | 54656   | SPINAL.CORD           | 42  | 51  | 0.307 | -0.618 | 0.169 | 5.25E-04 | 0.006    |
| ENSG00000185294.5  | 17_43740565_G_T_b37 | rs1724409_SPPL2C     | TRANS | Y | -181691 | CEREBELLUM            | 82  | 102 | 0.331 | -0.600 | 0.070 | 3.42E-14 | 1.07E-12 |
| ENSG00000185294.5  | 17_43740565_G_T_b37 | rs1724409_SPPL2C     | TRANS | Y | -181691 | CEREBELLAR.HEMISPHERE | 64  | 80  | 0.320 | -0.491 | 0.080 | 1.49E-08 | 2.62E-07 |
| ENSG00000185294.5  | 17_43740565_G_T_b37 | rs1724409_SPPL2C     | TRANS | Y | -181691 | FRONTAL.CORTEX        | 66  | 82  | 0.347 | -0.354 | 0.103 | 8.79E-04 | 0.010    |
| ENSG00000185294.5  | 17_43740565_G_T_b37 | rs1724409_SPPL2C     | TRANS | Y | -181691 | NUCLEUS.ACCUMBENS     | 74  | 91  | 0.350 | 0.295  | 0.103 | 0.005    | 0.047    |
| ENSG00000145020.10 | 3_49897830_C_T_b37  | rs2681780_AMT        | TRANS | Y | 437644  | HYPOTHALAMUS          | 76  | 106 | 0.491 | -0.225 | 0.063 | 5.83E-04 | 0.007    |
| ENSG00000164076.12 | 3_49897830_C_T_b37  | rs2681780_CAMKV      | TRANS | Y | -9825   | NUCLEUS.ACCUMBENS     | 94  | 129 | 0.496 | 0.104  | 0.032 | 0.002    | 0.019    |
| ENSG00000173402.7  | 3_49897830_C_T_b37  | rs2681780_DAG1       | TRANS | Y | 391684  | CEREBELLAR.HEMISPHERE | 89  | 123 | 0.492 | -0.126 | 0.043 | 0.004    | 0.043    |
| ENSG00000233276.2  | 3_49897830_C_T_b37  | rs2681780_GPX1       | TRANS | Y | 501797  | CEREBELLUM            | 109 | 152 | 0.494 | 0.168  | 0.054 | 0.003    | 0.026    |
| ENSG00000186792.11 | 3_49897830_C_T_b37  | rs2681780_HYAL3      | TRANS | Y | -435374 | NUCLEUS.ACCUMBENS     | 94  | 129 | 0.496 | -0.289 | 0.073 | 1.40E-04 | 0.002    |
| ENSG00000186792.11 | 3_49897830_C_T_b37  | rs2681780_HYAL3      | TRANS | Y | -435374 | CEREBELLUM            | 109 | 152 | 0.494 | -0.263 | 0.074 | 5.71E-04 | 0.007    |
| ENSG00000186792.11 | 3_49897830_C_T_b37  | rs2681780_HYAL3      | TRANS | Y | -435374 | SUBSTANTIA.NIGRA      | 55  | 79  | 0.494 | -0.235 | 0.079 | 0.004    | 0.041    |
| ENSG00000185614.4  | 3_49897830_C_T_b37  | rs2681780_INKA1      | TRANS | N | 57143   | CEREBELLUM            | 109 | 152 | 0.494 | 0.473  | 0.058 | 5.46E-13 | 1.46E-11 |
| ENSG00000185614.4  | 3_49897830_C_T_b37  | rs2681780_INKA1      | TRANS | N | 57143   | CEREBELLAR.HEMISPHERE | 89  | 123 | 0.492 | 0.413  | 0.064 | 3.98E-09 | 7.27E-08 |
| ENSG00000164078.8  | 3_49897830_C_T_b37  | rs2681780_MST1R      | TRANS | Y | -43447  | CEREBELLUM            | 109 | 152 | 0.494 | 0.468  | 0.066 | 1.40E-10 | 2.79E-09 |
| ENSG00000164078.8  | 3_49897830_C_T_b37  | rs2681780_MST1R      | TRANS | Y | -43447  | CEREBELLAR.HEMISPHERE | 89  | 123 | 0.492 | 0.361  | 0.073 | 3.25E-06 | 4.88E-05 |
| ENSG00000164078.8  | 3_49897830_C_T_b37  | rs2681780_MST1R      | TRANS | Y | -43447  | CAUDATE               | 106 | 142 | 0.493 | 0.358  | 0.074 | 3.93E-06 | 5.82E-05 |
| ENSG00000164078.8  | 3_49897830_C_T_b37  | rs2681780_MST1R      | TRANS | Y | -43447  | CORTEX                | 93  | 131 | 0.482 | 0.415  | 0.088 | 7.72E-06 | 1.12E-04 |
| ENSG00000164078.8  | 3_49897830_C_T_b37  | rs2681780_MST1R      | TRANS | Y | -43447  | CINGULATE             | 79  | 104 | 0.477 | 0.385  | 0.099 | 2.06E-04 | 0.003    |
| ENSG00000164078.8  | 3_49897830_C_T_b37  | rs2681780_MST1R      | TRANS | Y | -43447  | NUCLEUS.ACCUMBENS     | 94  | 129 | 0.496 | 0.302  | 0.083 | 4.10E-04 | 0.005    |
| ENSG00000164078.8  | 3_49897830_C_T_b37  | rs2681780_MST1R      | TRANS | Y | -43447  | HYPOTHALAMUS          | 76  | 106 | 0.491 | 0.304  | 0.099 | 0.003    | 0.029    |
| ENSG00000243477.1  | 3_49897830_C_T_b37  | rs2681780_NAA80      | TRANS | Y | -439022 | CINGULATE             | 79  | 104 | 0.477 | 0.161  | 0.052 | 0.003    | 0.027    |
| ENSG00000003756.12 | 3_49897830_C_T_b37  | rs2681780_RBM5       | TRANS | Y | -228511 | PUTAMEN               | 78  | 107 | 0.482 | -0.183 | 0.062 | 0.004    | 0.041    |
| ENSG00000004534.10 | 3_49897830_C_T_b37  | rs2681780_RBM6       | TRANS | Y | -79610  | CEREBELLUM            | 109 | 152 | 0.494 | -0.623 | 0.041 | 1.20E-29 | 7.37E-27 |
| ENSG00000004534.10 | 3_49897830_C_T_b37  | rs2681780_RBM6       | TRANS | Y | -79610  | NUCLEUS.ACCUMBENS     | 94  | 129 | 0.496 | -0.463 | 0.049 | 5.78E-16 | 2.47E-14 |
| ENSG00000004534.10 | 3_49897830_C_T_b37  | rs2681780_RBM6       | TRANS | Y | -79610  | CINGULATE             | 79  | 104 | 0.477 | -0.455 | 0.048 | 3.79E-15 | 1.43E-13 |
| ENSG00000004534.10 | 3_49897830_C_T_b37  | rs2681780_RBM6       | TRANS | Y | -79610  | CORTEX                | 93  | 131 | 0.482 | -0.572 | 0.065 | 1.27E-14 | 4.43E-13 |
| ENSG00000004534.10 | 3_49897830_C_T_b37  | rs2681780_RBM6       | TRANS | Y | -79610  | CEREBELLAR.HEMISPHERE | 89  | 123 | 0.492 | -0.397 | 0.045 | 2.63E-14 | 8.50E-13 |

|                    |                    |                           |       |   |         |                       |     |     |       |        |       |          |          |
|--------------------|--------------------|---------------------------|-------|---|---------|-----------------------|-----|-----|-------|--------|-------|----------|----------|
| ENSG00000004534.10 | 3_49897830_C_T_b37 | rs2681780_RBM6            | TRANS | Y | -79610  | PUTAMEN               | 78  | 107 | 0.482 | -0.507 | 0.060 | 6.39E-13 | 1.68E-11 |
| ENSG00000004534.10 | 3_49897830_C_T_b37 | rs2681780_RBM6            | TRANS | Y | -79610  | CAUDATE               | 106 | 142 | 0.493 | -0.413 | 0.056 | 1.69E-11 | 3.69E-10 |
| ENSG00000004534.10 | 3_49897830_C_T_b37 | rs2681780_RBM6            | TRANS | Y | -79610  | FRONTAL.CORTEX        | 86  | 118 | 0.500 | -0.420 | 0.056 | 2.96E-11 | 6.24E-10 |
| ENSG00000004534.10 | 3_49897830_C_T_b37 | rs2681780_RBM6            | TRANS | Y | -79610  | SPINAL.CORD           | 59  | 81  | 0.488 | -0.481 | 0.072 | 8.15E-09 | 1.45E-07 |
| ENSG00000004534.10 | 3_49897830_C_T_b37 | rs2681780_RBM6            | TRANS | Y | -79610  | HIPPOCAMPUS           | 76  | 104 | 0.468 | -0.248 | 0.045 | 4.41E-07 | 7.01E-06 |
| ENSG00000004534.10 | 3_49897830_C_T_b37 | rs2681780_RBM6            | TRANS | Y | -79610  | SUBSTANTIA.NIGRA      | 55  | 79  | 0.494 | -0.303 | 0.055 | 7.74E-07 | 1.21E-05 |
| ENSG00000004534.10 | 3_49897830_C_T_b37 | rs2681780_RBM6            | TRANS | Y | -79610  | HYPOTHALAMUS          | 76  | 106 | 0.491 | -0.295 | 0.065 | 2.00E-05 | 2.82E-04 |
| ENSG00000004534.10 | 3_49897830_C_T_b37 | rs2681780_RBM6            | TRANS | Y | -79610  | AMYGDALA              | 64  | 88  | 0.500 | -0.289 | 0.068 | 7.22E-05 | 9.64E-04 |
| ENSG00000164068.11 | 3_49897830_C_T_b37 | rs2681780_RNF123          | TRANS | Y | 170895  | CEREBELLUM            | 109 | 152 | 0.494 | 0.273  | 0.043 | 4.55E-09 | 8.25E-08 |
| ENSG00000164068.11 | 3_49897830_C_T_b37 | rs2681780_RNF123          | TRANS | Y | 170895  | CAUDATE               | 106 | 142 | 0.493 | 0.144  | 0.030 | 6.13E-06 | 9.02E-05 |
| ENSG00000164068.11 | 3_49897830_C_T_b37 | rs2681780_RNF123          | TRANS | Y | 170895  | HYPOTHALAMUS          | 76  | 106 | 0.491 | 0.187  | 0.039 | 6.47E-06 | 9.46E-05 |
| ENSG00000164068.11 | 3_49897830_C_T_b37 | rs2681780_RNF123          | TRANS | Y | 170895  | CEREBELLAR.HEMISPHERE | 89  | 123 | 0.492 | 0.209  | 0.048 | 2.78E-05 | 3.86E-04 |
| ENSG00000164068.11 | 3_49897830_C_T_b37 | rs2681780_RNF123          | TRANS | Y | 170895  | NUCLEUS.ACCUMBENS     | 94  | 129 | 0.496 | 0.159  | 0.037 | 3.71E-05 | 5.05E-04 |
| ENSG00000164068.11 | 3_49897830_C_T_b37 | rs2681780_RNF123          | TRANS | Y | 170895  | CORTEX                | 93  | 131 | 0.482 | 0.153  | 0.038 | 9.21E-05 | 0.001    |
| ENSG00000164068.11 | 3_49897830_C_T_b37 | rs2681780_RNF123          | TRANS | Y | 170895  | CINGULATE             | 79  | 104 | 0.477 | 0.133  | 0.034 | 2.16E-04 | 0.003    |
| ENSG00000164068.11 | 3_49897830_C_T_b37 | rs2681780_RNF123          | TRANS | Y | 170895  | FRONTAL.CORTEX        | 86  | 118 | 0.500 | 0.111  | 0.031 | 6.48E-04 | 0.008    |
| ENSG00000164068.11 | 3_49897830_C_T_b37 | rs2681780_RNF123          | TRANS | Y | 170895  | PUTAMEN               | 78  | 107 | 0.482 | 0.103  | 0.034 | 0.003    | 0.029    |
| ENSG00000164068.11 | 3_49897830_C_T_b37 | rs2681780_RNF123          | TRANS | Y | 170895  | SUBSTANTIA.NIGRA      | 55  | 79  | 0.494 | 0.162  | 0.054 | 0.004    | 0.041    |
| ENSG00000235016.1  | 3_49897830_C_T_b37 | rs2681780_SEMA3F-AS1      | TRANS | N | -295688 | CEREBELLAR.HEMISPHERE | 89  | 123 | 0.492 | 0.294  | 0.077 | 2.23E-04 | 0.003    |
| ENSG00000114316.8  | 3_49897830_C_T_b37 | rs2681780_USP4            | TRANS | Y | 519685  | NUCLEUS.ACCUMBENS     | 94  | 129 | 0.496 | -0.235 | 0.075 | 0.002    | 0.024    |
| ENSG00000176349.7  | 7_2110272_C_G_b37  | rs3800872_AC104129.1      | TRANS | N | 232050  | NUCLEUS.ACCUMBENS     | 50  | 58  | 0.223 | -0.358 | 0.110 | 0.002    | 0.017    |
| ENSG00000175873.3  | 7_2110272_C_G_b37  | rs3800872_ENSG00000175873 | TRANS | N | -367126 | HYPOTHALAMUS          | 43  | 53  | 0.245 | 0.343  | 0.119 | 0.005    | 0.048    |
| ENSG00000106003.8  | 7_2110272_C_G_b37  | rs3800872_LFNG            | TRANS | Y | -441891 | AMYGDALA              | 36  | 41  | 0.233 | 0.327  | 0.096 | 0.001    | 0.012    |
| ENSG00000002822.11 | 7_2110272_C_G_b37  | rs3800872_MAD111          | TRANS | Y | -162606 | SPINAL.CORD           | 39  | 46  | 0.277 | 0.382  | 0.114 | 0.001    | 0.016    |
| ENSG00000122687.13 | 7_2110272_C_G_b37  | rs3800872_MRM2            | TRANS | Y | -171568 | CEREBELLAR.HEMISPHERE | 48  | 58  | 0.232 | -0.236 | 0.071 | 0.001    | 0.013    |
| ENSG00000122687.13 | 7_2110272_C_G_b37  | rs3800872_MRM2            | TRANS | Y | -171568 | CAUDATE               | 58  | 67  | 0.233 | -0.260 | 0.087 | 0.003    | 0.034    |
| ENSG00000122687.13 | 7_2110272_C_G_b37  | rs3800872_MRM2            | TRANS | Y | -171568 | NUCLEUS.ACCUMBENS     | 50  | 58  | 0.223 | -0.334 | 0.112 | 0.003    | 0.035    |
| ENSG00000122687.13 | 7_2110272_C_G_b37  | rs3800872_MRM2            | TRANS | Y | -171568 | CORTEX                | 53  | 60  | 0.221 | -0.290 | 0.098 | 0.004    | 0.040    |



**Table S7: Gene-based associations that survived Bonferroni multiple testing correction (European-Americans).**

| GENE            | CHR | START    | STOP      | NSNPS | Z      | P        | SYMBOL          |
|-----------------|-----|----------|-----------|-------|--------|----------|-----------------|
| ENSG00000183763 | 3   | 49856034 | 49904007  | 32    | 6.7655 | 6.64E-12 | <i>TRAIP</i>    |
| ENSG00000164068 | 3   | 49716932 | 49768962  | 60    | 6.3082 | 1.41E-10 | <i>RNF123</i>   |
| ENSG00000164076 | 3   | 49885421 | 49917655  | 30    | 6.2626 | 1.89E-10 | <i>CAMKV</i>    |
| ENSG00000004534 | 3   | 49967440 | 50147478  | 262   | 6.1533 | 3.79E-10 | <i>RBM6</i>     |
| ENSG00000176020 | 3   | 49744267 | 49771349  | 34    | 6.1499 | 3.88E-10 | <i>AMIGO3</i>   |
| ENSG00000173540 | 3   | 49744277 | 49771384  | 34    | 6.1499 | 3.88E-10 | <i>GMPPB</i>    |
| ENSG00000164077 | 3   | 49936302 | 49977606  | 41    | 6.0925 | 5.56E-10 | <i>MON1A</i>    |
| ENSG00000164078 | 3   | 49914435 | 49951299  | 33    | 6.0835 | 5.88E-10 | <i>MST1R</i>    |
| ENSG00000003756 | 3   | 50116341 | 50166454  | 61    | 6.0006 | 9.83E-10 | <i>RBM5</i>     |
| ENSG00000176095 | 3   | 49751727 | 49833975  | 85    | 5.986  | 1.08E-09 | <i>IP6K1</i>    |
| ENSG00000108379 | 17  | 44829872 | 44920520  | 59    | 5.9477 | 1.36E-09 | <i>WNT3</i>     |
| ENSG00000186868 | 17  | 43961748 | 44115700  | 707   | 5.9367 | 1.45E-09 | <i>MAPT</i>     |
| ENSG00000120071 | 17  | 44097282 | 44312733  | 712   | 5.8385 | 2.63E-09 | <i>KANSL1</i>   |
| ENSG00000182179 | 3   | 49832640 | 49861379  | 14    | 5.4716 | 2.23E-08 | <i>UBA7</i>     |
| ENSG00000185614 | 3   | 49830687 | 49852463  | 12    | 5.4636 | 2.33E-08 | <i>FAM212A</i>  |
| ENSG00000185294 | 17  | 43912256 | 43934438  | 117   | 5.4342 | 2.75E-08 | <i>SPPL2C</i>   |
| ENSG00000225190 | 17  | 43503266 | 43578115  | 101   | 5.4342 | 2.75E-08 | <i>PLEKHM1</i>  |
| ENSG00000196628 | 18  | 52879562 | 53342018  | 472   | 5.4327 | 2.77E-08 | <i>TCF4</i>     |
| ENSG00000176681 | 17  | 44360099 | 44425160  | 54    | 5.4235 | 2.92E-08 | <i>LRRC37A</i>  |
| ENSG00000228696 | 17  | 44342150 | 44449130  | 189   | 5.4109 | 3.14E-08 | <i>ARL17B</i>   |
| ENSG00000256762 | 17  | 44066616 | 44087060  | 96    | 5.4021 | 3.29E-08 | <i>STH</i>      |
| ENSG00000120088 | 17  | 43689267 | 43923194  | 932   | 5.3941 | 3.44E-08 | <i>CRHR1</i>    |
| ENSG00000173531 | 3   | 49711380 | 49736934  | 24    | 5.3512 | 4.37E-08 | <i>MST1</i>     |
| ENSG00000184588 | 1   | 66248197 | 66850259  | 765   | 5.2752 | 6.63E-08 | <i>PDE4B</i>    |
| ENSG00000187492 | 3   | 49818165 | 49847268  | 26    | 5.2237 | 8.77E-08 | <i>CDHR4</i>    |
| ENSG00000159314 | 17  | 43461275 | 43521787  | 105   | 5.2161 | 9.14E-08 | <i>ARHGAP27</i> |
| ENSG00000073969 | 17  | 44658035 | 44844830  | 51    | 5.2048 | 9.71E-08 | <i>NSF</i>      |
| ENSG00000135250 | 7   | 1.05E+08 | 105049755 | 342   | 5.1825 | 1.09E-07 | <i>SRPK2</i>    |
| ENSG00000001617 | 3   | 50182478 | 50236508  | 67    | 4.8176 | 7.26E-07 | <i>SEMA3F</i>   |
| ENSG00000182985 | 11  | 1.15E+08 | 115385675 | 207   | 4.7221 | 1.17E-06 | <i>CADM1</i>    |

**Table S8: Genetic Correlation between REX and 1,779 phenotypic traits from UK Biobank and LDhub. For UK Biobank, information about phenotype coding is available at <http://biobank.ctsu.ox.ac.uk/crystal/>.**

| Source | p2                                                                           | rg      | se     | z        | p        |
|--------|------------------------------------------------------------------------------|---------|--------|----------|----------|
| UKB    | Overall health rating                                                        | 0.5591  | 0.0352 | 15.8732  | 9.71E-57 |
| UKB    | Mood swings                                                                  | 0.6616  | 0.0417 | 15.8671  | 1.07E-56 |
| UKB    | Frequency of tiredness / lethargy in last 2 weeks                            | 0.5972  | 0.0392 | 15.235   | 2.07E-52 |
| UKB    | Frequency of tenseness / restlessness in last 2 weeks                        | 0.6852  | 0.0456 | 15.02    | 5.43E-51 |
| UKB    | Pain type(s) experienced in last month: None of the above                    | -0.585  | 0.0397 | -14.7317 | 4.03E-49 |
| UKB    | Frequency of depressed mood in last 2 weeks                                  | 0.6576  | 0.0448 | 14.6711  | 9.87E-49 |
| UKB    | Frequency of unenthusiasm / disinterest in last 2 weeks                      | 0.6887  | 0.047  | 14.6452  | 1.45E-48 |
| UKB    | Neuroticism score                                                            | 0.5608  | 0.04   | 14.0142  | 1.28E-44 |
| UKB    | Fed-up feelings                                                              | 0.5527  | 0.0398 | 13.881   | 8.26E-44 |
| UKB    | Age at first live birth                                                      | -0.6184 | 0.0454 | -13.6144 | 3.29E-42 |
| UKB    | Seen doctor (GP) for nerves, anxiety, tension or depression                  | 0.5805  | 0.043  | 13.5011  | 1.54E-41 |
| UKB    | Current employment status: Unable to work because of sickness or disability  | 0.6569  | 0.0497 | 13.2274  | 6.10E-40 |
| UKB    | Tense / 'highly strung'                                                      | 0.5629  | 0.0437 | 12.8677  | 6.84E-38 |
| UKB    | Medication for pain relief, constipation, heartburn: None of the above       | -0.4843 | 0.0392 | -12.3535 | 4.66E-35 |
| UKB    | Qualifications: A levels/AS levels or equivalent                             | -0.5022 | 0.041  | -12.2466 | 1.75E-34 |
| UKB    | Treatment/medication code: paracetamol                                       | 0.555   | 0.0454 | 12.2141  | 2.61E-34 |
| UKB    | Medication for pain relief, constipation, heartburn: Paracetamol             | 0.4936  | 0.0406 | 12.1456  | 6.05E-34 |
| UKB    | Qualifications: College or University degree                                 | -0.4339 | 0.0365 | -11.8973 | 1.22E-32 |
| UKB    | Age completed full time education                                            | -0.5371 | 0.0452 | -11.8759 | 1.58E-32 |
| LDHUB  | Years of schooling 2016                                                      | -0.4238 | 0.0361 | -11.7265 | 9.32E-32 |
| UKB    | Loneliness, isolation                                                        | 0.5631  | 0.0487 | 11.5592  | 6.63E-31 |
| UKB    | Miserableness                                                                | 0.5259  | 0.046  | 11.4408  | 2.62E-30 |
| LDHUB  | Depressive symptoms                                                          | 0.6356  | 0.0561 | 11.3234  | 1.00E-29 |
| UKB    | Sensitivity / hurt feelings                                                  | 0.4657  | 0.0415 | 11.2351  | 2.74E-29 |
| UKB    | Wheeze or whistling in the chest in last year                                | 0.5175  | 0.0461 | 11.2161  | 3.40E-29 |
| UKB    | Smoking status: Current                                                      | 0.434   | 0.0387 | 11.2137  | 3.49E-29 |
| LDHUB  | Intelligence                                                                 | -0.5306 | 0.0478 | -11.1038 | 1.20E-28 |
| UKB    | Pain type(s) experienced in last month: Neck or shoulder pain                | 0.553   | 0.0499 | 11.0888  | 1.42E-28 |
| UKB    | Qualifications: None of the above                                            | 0.4276  | 0.0386 | 11.0834  | 1.51E-28 |
| LDHUB  | Age of first birth                                                           | -0.551  | 0.0498 | -11.0616 | 1.93E-28 |
| UKB    | Fluid intelligence score                                                     | -0.4788 | 0.0434 | -11.0382 | 2.50E-28 |
| UKB    | Current tobacco smoking                                                      | 0.4358  | 0.0396 | 11.006   | 3.57E-28 |
| UKB    | Seen a psychiatrist for nerves, anxiety, tension or depression               | 0.5603  | 0.0514 | 10.8929  | 1.25E-27 |
| UKB    | Qualifications: O levels/GCSEs or equivalent                                 | -0.4429 | 0.0415 | -10.6782 | 1.29E-26 |
| UKB    | Falls in the last year                                                       | 0.5089  | 0.0478 | 10.6416  | 1.91E-26 |
| LDHUB  | Neuroticism                                                                  | 0.5454  | 0.0519 | 10.5018  | 8.47E-26 |
| UKB    | Guilty feelings                                                              | 0.4453  | 0.0428 | 10.4054  | 2.34E-25 |
| UKB    | Job involves mainly walking or standing                                      | 0.5053  | 0.0486 | 10.3916  | 2.71E-25 |
| UKB    | Worrier / anxious feelings                                                   | 0.4407  | 0.0424 | 10.391   | 2.73E-25 |
| UKB    | Maternal smoking around birth                                                | 0.4231  | 0.0409 | 10.3353  | 4.88E-25 |
| UKB    | Job involves heavy manual or physical work                                   | 0.5184  | 0.0506 | 10.2486  | 1.20E-24 |
| UKB    | Pain type(s) experienced in last month: Back pain                            | 0.4749  | 0.0464 | 10.2383  | 1.34E-24 |
| UKB    | Long-standing illness, disability or infirmity                               | 0.4057  | 0.0401 | 10.1047  | 5.27E-24 |
| UKB    | Exposure to tobacco smoke outside home                                       | 0.4778  | 0.0475 | 10.0646  | 7.92E-24 |
| UKB    | Noisy workplace                                                              | 0.636   | 0.0634 | 10.0309  | 1.11E-23 |
| UKB    | Health satisfaction                                                          | 0.5361  | 0.0537 | 9.9852   | 1.77E-23 |
| UKB    | Illness, injury, bereavement, stress in last 2 years: Financial difficulties | 0.5044  | 0.0511 | 9.8739   | 5.40E-23 |
| UKB    | Alcohol intake frequency.                                                    | 0.3762  | 0.0387 | 9.7111   | 2.70E-22 |
| UKB    | Pain type(s) experienced in last month: Headache                             | 0.41    | 0.0424 | 9.6727   | 3.94E-22 |
| UKB    | Number of self-reported non-cancer illnesses                                 | 0.4042  | 0.0418 | 9.668    | 4.12E-22 |
| UKB    | Illness, injury, bereavement, stress in last 2 years: None of the above      | -0.5361 | 0.0567 | -9.4527  | 3.30E-21 |
| UKB    | Leg pain on walking                                                          | 0.5433  | 0.058  | 9.3706   | 7.21E-21 |
| UKB    | Number of treatments/medications taken                                       | 0.4148  | 0.0444 | 9.3493   | 8.82E-21 |
| UKB    | Pain type(s) experienced in last month: Stomach or abdominal pain            | 0.5241  | 0.0562 | 9.3192   | 1.17E-20 |
| UKB    | Pain type(s) experienced in last month: Hip pain                             | 0.5243  | 0.0567 | 9.2497   | 2.25E-20 |
| UKB    | Leg fat percentage (left)                                                    | 0.285   | 0.0314 | 9.0705   | 1.19E-19 |
| UKB    | Ever unenthusiastic/disinterested for a whole week                           | 0.5726  | 0.0632 | 9.058    | 1.33E-19 |
| UKB    | Alcohol drinker status: Previous                                             | 0.5831  | 0.0644 | 9.0545   | 1.37E-19 |
| UKB    | Leg fat percentage (right)                                                   | 0.2868  | 0.0318 | 9.0221   | 1.85E-19 |
| UKB    | Taking other prescription medications                                        | 0.4451  | 0.0493 | 9.0197   | 1.89E-19 |

|       |                                                                                                   |         |        |         |          |
|-------|---------------------------------------------------------------------------------------------------|---------|--------|---------|----------|
| UKB   | Ever highly irritable/argumentative for 2 days                                                    | 0.5993  | 0.0665 | 9.0184  | 1.91E-19 |
| UKB   | Number of days/week of moderate physical activity 10+ minutes                                     | 0.4302  | 0.0479 | 8.9859  | 2.57E-19 |
| UKB   | Pack years adult smoking as proportion of life span exposed to smoking PREVIEW ONLY               | 0.3881  | 0.0433 | 8.968   | 3.02E-19 |
| UKB   | Treatment/medication code: co-codamol                                                             | 0.7841  | 0.0885 | 8.8594  | 8.05E-19 |
| UKB   | Shortness of breath walking on level ground                                                       | 0.6397  | 0.0732 | 8.7431  | 2.27E-18 |
| UKB   | Pain type(s) experienced in last month: Knee pain                                                 | 0.4031  | 0.0465 | 8.6756  | 4.11E-18 |
| UKB   | Non-cancer illness code, self-reported: depression                                                | 0.5758  | 0.0664 | 8.6675  | 4.42E-18 |
| UKB   | Sleeplessness / insomnia                                                                          | 0.3702  | 0.043  | 8.6077  | 7.45E-18 |
| UKB   | Chest pain or discomfort                                                                          | 0.4777  | 0.0557 | 8.5798  | 9.50E-18 |
| UKB   | Mouth/teeth dental problems: None of the above                                                    | -0.4049 | 0.048  | -8.4415 | 3.13E-17 |
| UKB   | Age at last live birth                                                                            | -0.4702 | 0.0558 | -8.4303 | 3.45E-17 |
| UKB   | Frequency of walking for pleasure in last 4 weeks                                                 | 0.4955  | 0.0592 | 8.3705  | 5.74E-17 |
| UKB   | Pack years of smoking PREVIEW ONLY                                                                | 0.3764  | 0.0452 | 8.3323  | 7.93E-17 |
| UKB   | Drive faster than motorway speed limit                                                            | -0.3658 | 0.0446 | -8.198  | 2.44E-16 |
| UKB   | Qualifications: CSEs or equivalent                                                                | 0.4766  | 0.0585 | 8.1412  | 3.92E-16 |
| LDHUB | College completion                                                                                | -0.4616 | 0.057  | -8.092  | 5.87E-16 |
| UKB   | Townsend deprivation index at recruitment                                                         | 0.418   | 0.0518 | 8.0662  | 7.25E-16 |
| UKB   | Blood clot, DVT, bronchitis, emphysema, asthma, rhinitis, eczema, allergy diagnosed by doct       | 0.5268  | 0.0656 | 8.0253  | 1.01E-15 |
| UKB   | Suffer from 'nerves'                                                                              | 0.4056  | 0.0506 | 8.0098  | 1.15E-15 |
| UKB   | Body mass index (BMI)                                                                             | 0.2323  | 0.0291 | 7.9862  | 1.39E-15 |
| UKB   | Leg fat mass (right)                                                                              | 0.2508  | 0.0315 | 7.9724  | 1.56E-15 |
| UKB   | Leg fat mass (left)                                                                               | 0.246   | 0.0311 | 7.908   | 2.62E-15 |
| LDHUB | Years of schooling (proxy cognitive performance)                                                  | -0.4251 | 0.054  | -7.8719 | 3.49E-15 |
| UKB   | Time spent watching television (TV)                                                               | 0.2965  | 0.0381 | 7.7913  | 6.63E-15 |
| UKB   | Usual walking pace                                                                                | -0.3127 | 0.0403 | -7.7525 | 9.01E-15 |
| UKB   | Ever depressed for a whole week                                                                   | 0.4718  | 0.0616 | 7.6535  | 1.96E-14 |
| UKB   | Mouth/teeth dental problems: Dentures                                                             | 0.3297  | 0.0431 | 7.6435  | 2.11E-14 |
| UKB   | Mother's age at death                                                                             | -0.5306 | 0.0697 | -7.6092 | 2.76E-14 |
| UKB   | Job involves shift work                                                                           | 0.5311  | 0.0699 | 7.5978  | 3.01E-14 |
| UKB   | Qualifications: NVQ or HND or HNC or equivalent                                                   | 0.4932  | 0.0658 | 7.4949  | 6.63E-14 |
| UKB   | Prospective memory result                                                                         | 0.5074  | 0.068  | 7.4643  | 8.38E-14 |
| UKB   | Number of operations, self-reported                                                               | 0.3481  | 0.0468 | 7.4381  | 1.02E-13 |
| UKB   | Body fat percentage                                                                               | 0.2334  | 0.0315 | 7.4081  | 1.28E-13 |
| UKB   | Nervous feelings                                                                                  | 0.3442  | 0.0469 | 7.3324  | 2.26E-13 |
| LDHUB | Years of schooling 2013                                                                           | -0.4017 | 0.0549 | -7.3202 | 2.48E-13 |
| UKB   | Pain type(s) experienced in last month: Pain all over the body                                    | 0.6399  | 0.088  | 7.2738  | 3.50E-13 |
| UKB   | Number of full brothers                                                                           | 0.4065  | 0.0574 | 7.0775  | 1.47E-12 |
| UKB   | Irritability                                                                                      | 0.3305  | 0.0467 | 7.0769  | 1.47E-12 |
| UKB   | Diagnoses - main ICD10: R07 Pain in throat and chest                                              | 0.5019  | 0.0712 | 7.0523  | 1.76E-12 |
| UKB   | Treatment/medication code: tramadol                                                               | 0.5743  | 0.0816 | 7.0366  | 1.97E-12 |
| UKB   | Peak expiratory flow (PEF)                                                                        | -0.2759 | 0.0392 | -7.0306 | 2.06E-12 |
| UKB   | Alcohol intake versus 10 years previously                                                         | 0.3406  | 0.0485 | 7.0177  | 2.26E-12 |
| UKB   | Qualifications: Other professional qualifications eg: nursing, teaching                           | -0.3137 | 0.0448 | -7.0103 | 2.38E-12 |
| UKB   | Diagnoses - main ICD10: R10 Abdominal and pelvic pain                                             | 0.5024  | 0.0718 | 7.0002  | 2.56E-12 |
| UKB   | Waist circumference                                                                               | 0.2146  | 0.0308 | 6.9733  | 3.10E-12 |
| UKB   | Alcohol usually taken with meals                                                                  | -0.3139 | 0.0451 | -6.9644 | 3.30E-12 |
| LDHUB | Ever vs never smoked                                                                              | 0.4379  | 0.063  | 6.9458  | 3.76E-12 |
| LDHUB | Schizophrenia                                                                                     | 0.2534  | 0.0367 | 6.9009  | 5.17E-12 |
| UKB   | Arm fat percentage (right)                                                                        | 0.205   | 0.0297 | 6.8947  | 5.40E-12 |
| UKB   | Transport type for commuting to job workplace: Cycle                                              | -0.4315 | 0.063  | -6.8499 | 7.39E-12 |
| UKB   | Vascular/heart problems diagnosed by doctor: None of the above                                    | -0.23   | 0.0337 | -6.8264 | 8.71E-12 |
| UKB   | Arm fat mass (right)                                                                              | 0.2028  | 0.0299 | 6.7839  | 1.17E-11 |
| UKB   | Whole body fat mass                                                                               | 0.2104  | 0.031  | 6.7827  | 1.18E-11 |
| UKB   | Average weekly red wine intake                                                                    | -0.3234 | 0.0477 | -6.7823 | 1.18E-11 |
| UKB   | Financial situation satisfaction                                                                  | 0.4148  | 0.0613 | 6.7653  | 1.33E-11 |
| UKB   | Diagnoses - main ICD10: M54 Dorsalgia                                                             | 0.569   | 0.0842 | 6.7584  | 1.40E-11 |
| UKB   | Treatment/medication code: omeprazole                                                             | 0.5031  | 0.0745 | 6.7499  | 1.48E-11 |
| UKB   | Arm fat percentage (left)                                                                         | 0.1987  | 0.0299 | 6.6548  | 2.84E-11 |
| UKB   | Arm fat mass (left)                                                                               | 0.1978  | 0.0298 | 6.6375  | 3.19E-11 |
| UKB   | Exposure to tobacco smoke at home                                                                 | 0.5092  | 0.0769 | 6.6243  | 3.49E-11 |
| UKB   | Non-cancer illness code, self-reported: emphysema/chronic bronchitis                              | 0.4866  | 0.0736 | 6.6115  | 3.81E-11 |
| UKB   | Breastfed as a baby                                                                               | -0.3973 | 0.0605 | -6.5621 | 5.31E-11 |
| UKB   | Types of physical activity in last 4 weeks: Other exercises (eg: swimming, cycling, keep fit, box | -0.3287 | 0.0503 | -6.5303 | 6.56E-11 |

|       |                                                                                                      |         |        |         |          |
|-------|------------------------------------------------------------------------------------------------------|---------|--------|---------|----------|
| UKB   | Medication for pain relief, constipation, heartburn: Omeprazole (e.g. Zanol)                         | 0.4192  | 0.0645 | 6.4968  | 8.21E-11 |
| UKB   | Illnesses of mother: Chronic bronchitis/emphysema                                                    | 0.6198  | 0.0956 | 6.4846  | 8.90E-11 |
| UKB   | Father's age at death                                                                                | -0.3529 | 0.0546 | -6.4592 | 1.05E-10 |
| UKB   | Trunk fat percentage                                                                                 | 0.2061  | 0.0323 | 6.3737  | 1.85E-10 |
| UKB   | Average weekly champagne plus white wine intake                                                      | -0.3629 | 0.057  | -6.3688 | 1.91E-10 |
| UKB   | Ever manic/hyper for 2 days                                                                          | 0.7362  | 0.1156 | 6.3687  | 1.91E-10 |
| UKB   | Age started oral contraceptive pill                                                                  | -0.382  | 0.0606 | -6.3018 | 2.94E-10 |
| UKB   | Illness, injury, bereavement, stress in last 2 years: Serious illness, injury or assault to yourself | 0.4682  | 0.0752 | 6.2225  | 4.89E-10 |
| UKB   | Sodium in urine                                                                                      | 0.2411  | 0.0393 | 6.1324  | 8.65E-10 |
| LDHUB | Insomnia                                                                                             | 0.3787  | 0.0619 | 6.1178  | 9.49E-10 |
| UKB   | Types of physical activity in last 4 weeks: None of the above                                        | 0.3766  | 0.0616 | 6.1108  | 9.92E-10 |
| UKB   | Illnesses of siblings: None of the above (group 1)                                                   | -0.2887 | 0.0475 | -6.0717 | 1.27E-09 |
| UKB   | Trunk fat mass                                                                                       | 0.1911  | 0.0315 | 6.0678  | 1.30E-09 |
| UKB   | Duration of walks                                                                                    | 0.2878  | 0.0475 | 6.0565  | 1.39E-09 |
| UKB   | Number of live births                                                                                | 0.318   | 0.0525 | 6.0564  | 1.39E-09 |
| UKB   | Ever had stillbirth, spontaneous miscarriage or termination                                          | 0.4717  | 0.0786 | 5.9983  | 1.99E-09 |
| UKB   | Risk taking                                                                                          | 0.2484  | 0.0417 | 5.9554  | 2.59E-09 |
| UKB   | Ever used hormone-replacement therapy (HRT)                                                          | 0.3382  | 0.0569 | 5.9459  | 2.75E-09 |
| LDHUB | Childhood IQ                                                                                         | -0.5508 | 0.0929 | -5.9317 | 3.00E-09 |
| UKB   | Number of days/week of vigorous physical activity 10+ minutes                                        | 0.2936  | 0.0495 | 5.9288  | 3.05E-09 |
| UKB   | Vascular/heart problems diagnosed by doctor: High blood pressure                                     | 0.207   | 0.035  | 5.9223  | 3.17E-09 |
| UKB   | Number of incorrect matches in round                                                                 | 0.2509  | 0.0424 | 5.9167  | 3.29E-09 |
| UKB   | Chest pain or discomfort walking normally                                                            | 0.4354  | 0.0738 | 5.9012  | 3.61E-09 |
| UKB   | Diagnoses - main ICD10: M75 Shoulder lesions                                                         | 0.667   | 0.1131 | 5.8989  | 3.66E-09 |
| UKB   | Illnesses of father: Chronic bronchitis/emphysema                                                    | 0.3982  | 0.0676 | 5.8909  | 3.84E-09 |
| UKB   | Duration walking for pleasure                                                                        | -0.36   | 0.0615 | -5.8552 | 4.76E-09 |
| UKB   | Types of physical activity in last 4 weeks: Strenuous sports                                         | -0.3282 | 0.0572 | -5.7393 | 9.51E-09 |
| UKB   | Treatment/medication code: amitriptyline                                                             | 0.5077  | 0.0898 | 5.6564  | 1.55E-08 |
| UKB   | Other serious medical condition/disability diagnosed by doctor                                       | 0.3258  | 0.0576 | 5.6552  | 1.56E-08 |
| UKB   | Forced expiratory volume in 1-second (FEV1)                                                          | -0.2025 | 0.0359 | -5.6421 | 1.68E-08 |
| UKB   | Forced expiratory volume in 1-second (FEV1), Best measure                                            | -0.2103 | 0.0375 | -5.6067 | 2.06E-08 |
| UKB   | Non-cancer illness code, self-reported: hypertension                                                 | 0.1981  | 0.0354 | 5.5925  | 2.24E-08 |
| UKB   | Ever had hysterectomy (womb removed)                                                                 | 0.4333  | 0.0784 | 5.5267  | 3.26E-08 |
| UKB   | Number of days/week walked 10+ minutes                                                               | 0.2651  | 0.0481 | 5.5145  | 3.50E-08 |
| UKB   | Types of physical activity in last 4 weeks: Light DIY (eg: pruning, watering the lawn)               | -0.2525 | 0.0461 | -5.478  | 4.30E-08 |
| LDHUB | Neuroticism                                                                                          | 0.6606  | 0.1214 | 5.4426  | 5.25E-08 |
| UKB   | Medication for pain relief, constipation, heartburn: Laxatives (e.g. Dulcolax, Senokot)              | 0.4269  | 0.079  | 5.4007  | 6.64E-08 |
| UKB   | Non-cancer illness code, self-reported: osteoarthritis                                               | 0.3423  | 0.0641 | 5.3421  | 9.19E-08 |
| UKB   | Illness, injury, bereavement, stress in last 2 years: Death of a close relative                      | 0.5635  | 0.1059 | 5.3199  | 1.04E-07 |
| UKB   | Duration of moderate activity                                                                        | 0.345   | 0.0651 | 5.3021  | 1.14E-07 |
| UKB   | Treatment/medication code: ibuprofen                                                                 | 0.3842  | 0.0732 | 5.2493  | 1.53E-07 |
| UKB   | Frequency of heavy DIY in last 4 weeks                                                               | 0.503   | 0.096  | 5.2413  | 1.59E-07 |
| UKB   | Illnesses of father: Lung cancer                                                                     | 0.3835  | 0.0737 | 5.2014  | 1.98E-07 |
| UKB   | Adopted as a child                                                                                   | 0.4903  | 0.0943 | 5.1986  | 2.01E-07 |
| UKB   | Weight                                                                                               | 0.1532  | 0.0295 | 5.1874  | 2.13E-07 |
| UKB   | Forced expiratory volume in 1-second (FEV1), predicted percentage                                    | -0.2189 | 0.0424 | -5.16   | 2.47E-07 |
| UKB   | Medication for cholesterol, blood pressure, diabetes, or take exogenous hormones: None of t          | -0.2486 | 0.0482 | -5.1598 | 2.47E-07 |
| UKB   | Illnesses of father: None of the above (group 2)                                                     | -0.4404 | 0.0854 | -5.1587 | 2.49E-07 |
| UKB   | Types of transport used (excluding work): Cycle                                                      | -0.334  | 0.0653 | -5.112  | 3.19E-07 |
| UKB   | Impedance of arm (left)                                                                              | -0.1451 | 0.0285 | -5.0968 | 3.45E-07 |
| UKB   | Weight change compared with 1 year ago                                                               | 0.4441  | 0.0875 | 5.0761  | 3.85E-07 |
| UKB   | Illnesses of siblings: Heart disease                                                                 | 0.3585  | 0.0708 | 5.0627  | 4.13E-07 |
| UKB   | Forced vital capacity (FVC), Best measure                                                            | -0.187  | 0.037  | -5.0578 | 4.24E-07 |
| UKB   | Non-cancer illness code, self-reported: asthma                                                       | 0.209   | 0.0414 | 5.0497  | 4.42E-07 |
| LDHUB | Waist circumference                                                                                  | 0.1686  | 0.0334 | 5.0405  | 4.64E-07 |
| UKB   | Light smokers, at least 100 smokes in lifetime                                                       | 0.2902  | 0.0581 | 4.9939  | 5.92E-07 |
| UKB   | Illnesses of mother: Severe depression                                                               | 0.4829  | 0.0968 | 4.9873  | 6.12E-07 |
| UKB   | Why stopped smoking: Health precaution                                                               | -0.3867 | 0.0778 | -4.9734 | 6.58E-07 |
| UKB   | Frequency of travelling from home to job workplace                                                   | 0.3484  | 0.0701 | 4.969   | 6.73E-07 |
| UKB   | Medication for pain relief, constipation, heartburn: Ibuprofen (e.g. Nurofen)                        | 0.313   | 0.0633 | 4.9466  | 7.55E-07 |
| LDHUB | Number of children ever born                                                                         | 0.2842  | 0.0579 | 4.9101  | 9.10E-07 |
| UKB   | Number of full sisters                                                                               | 0.3018  | 0.0617 | 4.8887  | 1.01E-06 |
| UKB   | Medication for cholesterol, blood pressure, diabetes, or take exogenous hormones: Choleste           | 0.2766  | 0.0567 | 4.8803  | 1.06E-06 |

|       |                                                                                                |         |        |         |          |
|-------|------------------------------------------------------------------------------------------------|---------|--------|---------|----------|
| UKB   | Non-cancer illness code, self-reported: chronic obstructive airways disease/copd               | 0.6118  | 0.1255 | 4.8763  | 1.08E-06 |
| UKB   | Pain type(s) experienced in last month: Facial pain                                            | 0.4408  | 0.0904 | 4.8741  | 1.09E-06 |
| UKB   | Diagnoses - main ICD10: M17 Gonarthrosis [arthrosis of knee]                                   | 0.3184  | 0.0654 | 4.8707  | 1.11E-06 |
| UKB   | Current employment status: Doing unpaid or voluntary work                                      | -0.4733 | 0.0972 | -4.8687 | 1.12E-06 |
| UKB   | Forced vital capacity (FVC)                                                                    | -0.1725 | 0.0355 | -4.8525 | 1.22E-06 |
| UKB   | Blood clot, DVT, bronchitis, emphysema, asthma, rhinitis, eczema, allergy diagnosed by doctc   | 0.197   | 0.0406 | 4.8467  | 1.26E-06 |
| UKB   | Types of physical activity in last 4 weeks: Heavy DIY (eg: weeding, lawn mowing, carpentry, di | -0.2394 | 0.0497 | -4.814  | 1.48E-06 |
| UKB   | Illnesses of siblings: Severe depression                                                       | 0.3747  | 0.0784 | 4.7803  | 1.75E-06 |
| UKB   | Non-cancer illness code, self-reported: anxiety/panic attacks                                  | 0.5156  | 0.1087 | 4.7419  | 2.12E-06 |
| UKB   | Age of primiparous women at birth of child                                                     | -0.5079 | 0.1071 | -4.7409 | 2.13E-06 |
| UKB   | Types of physical activity in last 4 weeks: Walking for pleasure (not as a means of transport) | -0.2463 | 0.0528 | -4.6641 | 3.10E-06 |
| UKB   | Length of working week for main job                                                            | 0.3455  | 0.0741 | 4.6624  | 3.13E-06 |
| UKB   | Illnesses of siblings: Diabetes                                                                | 0.2943  | 0.0637 | 4.6211  | 3.82E-06 |
| LDHUB | Fathers age at death                                                                           | -0.3814 | 0.0836 | -4.5607 | 5.10E-06 |
| UKB   | Pulse rate, automated reading                                                                  | 0.1339  | 0.0294 | 4.5531  | 5.29E-06 |
| LDHUB | Lung cancer                                                                                    | 0.3889  | 0.0855 | 4.546   | 5.47E-06 |
| UKB   | Impedance of arm (right)                                                                       | -0.1287 | 0.0284 | -4.5392 | 5.65E-06 |
| UKB   | Non-cancer illness code, self-reported: deep venous thrombosis (dvt)                           | 0.3124  | 0.0697 | 4.4812  | 7.42E-06 |
| UKB   | Pulse wave peak to peak time                                                                   | -0.2625 | 0.0586 | -4.4793 | 7.49E-06 |
| UKB   | Leg pain on walking : action taken                                                             | -0.4614 | 0.1034 | -4.4618 | 8.13E-06 |
| UKB   | Smoking/smokers in household                                                                   | 0.4522  | 0.1015 | 4.4569  | 8.31E-06 |
| UKB   | Past tobacco smoking                                                                           | -0.1778 | 0.0401 | -4.4368 | 9.13E-06 |
| UKB   | Mouth/teeth dental problems: Loose teeth                                                       | 0.3014  | 0.0679 | 4.4358  | 9.17E-06 |
| UKB   | Bilateral oophorectomy (both ovaries removed)                                                  | 0.3098  | 0.0702 | 4.413   | 1.02E-05 |
| UKB   | Blood clot, DVT, bronchitis, emphysema, asthma, rhinitis, eczema, allergy diagnosed by doctc   | 0.3232  | 0.0734 | 4.4041  | 1.06E-05 |
| UKB   | Mineral and other dietary supplements: Glucosamine                                             | -0.2336 | 0.0531 | -4.3958 | 1.10E-05 |
| UKB   | Diagnoses - main ICD10: K29 Gastritis and duodenitis                                           | 0.3927  | 0.0894 | 4.3916  | 1.13E-05 |
| UKB   | Other eye problems                                                                             | 0.4183  | 0.0954 | 4.3838  | 1.17E-05 |
| UKB   | Worry too long after embarrassment                                                             | 0.1723  | 0.0399 | 4.3135  | 1.61E-05 |
| UKB   | Mouth/teeth dental problems: Painful gums                                                      | 0.4917  | 0.1149 | 4.2808  | 1.86E-05 |
| UKB   | Treatment/medication code: lansoprazole                                                        | 0.3112  | 0.0729 | 4.2685  | 1.97E-05 |
| UKB   | Transport type for commuting to job workplace: Public transport                                | -0.2911 | 0.0687 | -4.2402 | 2.23E-05 |
| UKB   | Had other major operations                                                                     | 0.2802  | 0.0661 | 4.2392  | 2.24E-05 |
| UKB   | Ever smoked                                                                                    | 0.1636  | 0.0386 | 4.2379  | 2.26E-05 |
| LDHUB | Subjective well being                                                                          | -0.2322 | 0.0548 | -4.2355 | 2.28E-05 |
| UKB   | No-wear time bias adjusted acceleration standard deviation                                     | -0.2588 | 0.0614 | -4.2167 | 2.48E-05 |
| UKB   | Non-cancer illness code, self-reported: gastro-oesophageal reflux (gord) / gastric reflux      | 0.3461  | 0.0826 | 4.1904  | 2.78E-05 |
| LDHUB | Lung cancer (all)                                                                              | 0.4105  | 0.0982 | 4.1798  | 2.92E-05 |
| LDHUB | Obesity class 3                                                                                | 0.3194  | 0.0764 | 4.1789  | 2.93E-05 |
| UKB   | Tobacco smoking: Ex-smoker                                                                     | 0.2864  | 0.0685 | 4.1788  | 2.93E-05 |
| UKB   | Non-cancer illness code, self-reported: angina                                                 | 0.2422  | 0.058  | 4.1761  | 2.97E-05 |
| UKB   | Duration of heavy DIY                                                                          | 0.2833  | 0.0679 | 4.1712  | 3.03E-05 |
| UKB   | Hip circumference                                                                              | 0.1287  | 0.031  | 4.153   | 3.28E-05 |
| UKB   | Former alcohol drinker                                                                         | 0.3587  | 0.0865 | 4.149   | 3.34E-05 |
| UKB   | Sleep duration                                                                                 | -0.1643 | 0.0398 | -4.1242 | 3.72E-05 |
| UKB   | Medication for cholesterol, blood pressure, diabetes, or take exogenous hormones: Hormone      | 0.3787  | 0.0922 | 4.1066  | 4.01E-05 |
| UKB   | Time spent using computer                                                                      | -0.1703 | 0.0416 | -4.0959 | 4.20E-05 |
| UKB   | Creatinine (enzymatic) in urine                                                                | 0.1631  | 0.04   | 4.0809  | 4.49E-05 |
| LDHUB | Waist-to-hip ratio                                                                             | 0.1545  | 0.0379 | 4.0774  | 4.55E-05 |
| UKB   | Had major operations                                                                           | 0.286   | 0.0702 | 4.0765  | 4.57E-05 |
| UKB   | Diagnoses - main ICD10: N39 Other disorders of urinary system                                  | 0.4917  | 0.1206 | 4.076   | 4.58E-05 |
| UKB   | Treatment/medication code: salbutamol                                                          | 0.4934  | 0.1223 | 4.036   | 5.44E-05 |
| UKB   | Average weekly fortified wine intake                                                           | -0.4301 | 0.1066 | -4.0348 | 5.46E-05 |
| UKB   | Illnesses of mother: None of the above (group 2)                                               | -0.3621 | 0.09   | -4.0254 | 5.69E-05 |
| UKB   | Duration of vigorous activity                                                                  | 0.2553  | 0.0636 | 4.0152  | 5.94E-05 |
| UKB   | Vascular/heart problems diagnosed by doctor: Angina                                            | 0.2381  | 0.0594 | 4.0054  | 6.19E-05 |
| UKB   | Diastolic blood pressure, automated reading                                                    | 0.1344  | 0.0337 | 3.9897  | 6.61E-05 |
| LDHUB | Obesity class 2                                                                                | 0.1921  | 0.0482 | 3.9822  | 6.83E-05 |
| UKB   | Maximum workload during fitness test                                                           | -0.4863 | 0.1222 | -3.9802 | 6.88E-05 |
| UKB   | Treatment/medication code: citalopram                                                          | 0.5697  | 0.1432 | 3.9772  | 6.97E-05 |
| LDHUB | Obesity class 1                                                                                | 0.1644  | 0.0415 | 3.9645  | 7.36E-05 |
| UKB   | Non-cancer illness code, self-reported: hiatus hernia                                          | 0.3881  | 0.098  | 3.9609  | 7.47E-05 |
| LDHUB | Major depressive disorder                                                                      | 0.4446  | 0.1126 | 3.9479  | 7.89E-05 |

|       |                                                                                                 |         |        |         |          |
|-------|-------------------------------------------------------------------------------------------------|---------|--------|---------|----------|
| UKB   | Illness, injury, bereavement, stress in last 2 years: Marital separation/divorce                | 0.7102  | 0.1811 | 3.9211  | 8.82E-05 |
| UKB   | Non-cancer illness code, self-reported: pulmonary embolism +/- dvt                              | 0.4144  | 0.1063 | 3.8982  | 9.69E-05 |
| UKB   | Hand grip strength (right)                                                                      | -0.136  | 0.0358 | -3.7942 | 0.0001   |
| UKB   | Ever stopped smoking for 6+ months                                                              | 0.5092  | 0.1341 | 3.7962  | 0.0001   |
| UKB   | Back pain for 3+ months                                                                         | 0.3239  | 0.0839 | 3.8618  | 0.0001   |
| UKB   | Illnesses of siblings: None of the above (group 2)                                              | -0.4027 | 0.1056 | -3.8133 | 0.0001   |
| UKB   | Illnesses of siblings: Chronic bronchitis/emphysema                                             | 0.5144  | 0.1348 | 3.8158  | 0.0001   |
| UKB   | Blood clot, DVT, bronchitis, emphysema, asthma, rhinitis, eczema, allergy diagnosed by doctc    | 0.3871  | 0.1016 | 3.8098  | 0.0001   |
| UKB   | Types of transport used (excluding work): Car/motor vehicle                                     | -0.2027 | 0.0532 | -3.8095 | 0.0001   |
| UKB   | Diagnoses - main ICD10: R51 Headache                                                            | 0.6278  | 0.1627 | 3.8592  | 0.0001   |
| LDHUB | Former vs Current smoker                                                                        | -0.3704 | 0.0952 | -3.8886 | 0.0001   |
| UKB   | Nap during day                                                                                  | 0.1584  | 0.0421 | 3.763   | 0.0002   |
| UKB   | Number of cigarettes previously smoked daily                                                    | 0.2108  | 0.0572 | 3.6861  | 0.0002   |
| UKB   | Number of unenthusiastic/disinterested episodes                                                 | 0.5103  | 0.1354 | 3.7701  | 0.0002   |
| UKB   | Pulse wave Arterial Stiffness index                                                             | 0.2292  | 0.0612 | 3.7434  | 0.0002   |
| UKB   | Non-cancer illness code, self-reported: spine arthritis/spondylitis                             | 0.4202  | 0.1114 | 3.7714  | 0.0002   |
| UKB   | Treatment/medication code: atenolol                                                             | 0.2265  | 0.0611 | 3.7104  | 0.0002   |
| UKB   | Treatment/medication code: fluoxetine                                                           | 0.6401  | 0.1741 | 3.6766  | 0.0002   |
| UKB   | Treatment/medication code: diclofenac                                                           | 0.3348  | 0.0912 | 3.6702  | 0.0002   |
| UKB   | Treatment/medication code: metformin                                                            | 0.1858  | 0.0493 | 3.7677  | 0.0002   |
| UKB   | Current employment status: In paid employment or self-employed                                  | -0.3647 | 0.0992 | -3.6764 | 0.0002   |
| UKB   | Reason for glasses/contact lenses: For short-sightedness, i.e. only or mainly for distance view | -0.2209 | 0.0592 | -3.7337 | 0.0002   |
| UKB   | Mouth/teeth dental problems: Toothache                                                          | 0.3265  | 0.0881 | 3.7071  | 0.0002   |
| UKB   | Medication for pain relief, constipation, heartburn: Ranitidine (e.g. Zantac)                   | 0.4389  | 0.1161 | 3.7815  | 0.0002   |
| UKB   | Standing height                                                                                 | -0.1021 | 0.0282 | -3.6231 | 0.0003   |
| UKB   | Happiness                                                                                       | 0.2196  | 0.0604 | 3.6329  | 0.0003   |
| UKB   | Treatment/medication code: diazepam                                                             | 0.5633  | 0.1547 | 3.6417  | 0.0003   |
| UKB   | Treatment/medication code: gliclazide                                                           | 0.2494  | 0.0686 | 3.6374  | 0.0003   |
| UKB   | Vascular/heart problems diagnosed by doctor: Stroke                                             | 0.596   | 0.1633 | 3.6497  | 0.0003   |
| UKB   | Why stopped smoking: Illness or ill health                                                      | 0.5503  | 0.1507 | 3.6516  | 0.0003   |
| UKB   | Diagnoses - main ICD10: M20 Acquired deformities of fingers and toes                            | 0.2795  | 0.0782 | 3.5753  | 0.0003   |
| UKB   | Diagnoses - main ICD10: M79 Other soft tissue disorders, not elsewhere classified               | 0.616   | 0.1691 | 3.6438  | 0.0003   |
| LDHUB | Attention deficit hyperactivity disorder (GC)                                                   | 0.6882  | 0.19   | 3.6212  | 0.0003   |
| LDHUB | Attention deficit hyperactivity disorder (No GC)                                                | 0.688   | 0.1903 | 3.6149  | 0.0003   |
| UKB   | Cough on most days                                                                              | 0.2567  | 0.0718 | 3.5739  | 0.0004   |
| UKB   | Arm predicted mass (left)                                                                       | 0.1016  | 0.0286 | 3.5498  | 0.0004   |
| UKB   | Manic/hyper symptoms: None of the above                                                         | -0.8089 | 0.2272 | -3.5608 | 0.0004   |
| UKB   | Why stopped smoking: Doctor's advice                                                            | 0.5602  | 0.1592 | 3.5184  | 0.0004   |
| UKB   | Types of transport used (excluding work): Walk                                                  | -0.1902 | 0.0537 | -3.5395 | 0.0004   |
| UKB   | Number of trend entries                                                                         | -0.5399 | 0.1555 | -3.4722 | 0.0005   |
| UKB   | Arm fat-free mass (left)                                                                        | 0.1007  | 0.0288 | 3.4963  | 0.0005   |
| LDHUB | Squamous cell lung cancer                                                                       | 0.4818  | 0.1385 | 3.4788  | 0.0005   |
| LDHUB | Parents age at death                                                                            | -0.3435 | 0.098  | -3.5045 | 0.0005   |
| UKB   | Average weekly beer plus cider intake                                                           | 0.1914  | 0.0555 | 3.4501  | 0.0006   |
| UKB   | Diabetes diagnosed by doctor                                                                    | 0.1503  | 0.0437 | 3.4356  | 0.0006   |
| UKB   | Time from waking to first cigarette                                                             | -0.4271 | 0.1245 | -3.4314 | 0.0006   |
| UKB   | Work/job satisfaction                                                                           | 0.2629  | 0.0765 | 3.4366  | 0.0006   |
| UKB   | Treatment/medication code: deep relief ibuprofen gel                                            | 0.4283  | 0.1244 | 3.4429  | 0.0006   |
| UKB   | Treatment/medication code: seretide 50 evohaler                                                 | 0.2826  | 0.0827 | 3.4192  | 0.0006   |
| UKB   | Illnesses of mother: Lung cancer                                                                | 0.5464  | 0.1587 | 3.4436  | 0.0006   |
| UKB   | Diagnoses - main ICD10: M47 Spondylosis                                                         | 0.5199  | 0.1508 | 3.4474  | 0.0006   |
| UKB   | Non-cancer illness code, self-reported: prolapsed disc/slipped disc                             | 0.3379  | 0.1    | 3.3793  | 0.0007   |
| UKB   | Tinnitus: Yes, but not now, but have in the past                                                | 0.3863  | 0.1136 | 3.3997  | 0.0007   |
| UKB   | Diagnoses - main ICD10: J44 Other chronic obstructive pulmonary disease                         | 0.495   | 0.1459 | 3.3921  | 0.0007   |
| UKB   | Non-cancer illness code, self-reported: stroke                                                  | 0.4902  | 0.1469 | 3.3363  | 0.0008   |
| UKB   | Diagnoses - main ICD10: M51 Other intervertebral disk disorders                                 | 0.5433  | 0.1615 | 3.3639  | 0.0008   |
| LDHUB | Body mass index                                                                                 | 0.1253  | 0.0375 | 3.342   | 0.0008   |
| UKB   | Number of children fathered                                                                     | 0.239   | 0.0718 | 3.3296  | 0.0009   |
| UKB   | Bring up phlegm/sputum/mucus on most days                                                       | 0.3229  | 0.0969 | 3.3309  | 0.0009   |
| UKB   | Treatment/medication code: ventolin 100micrograms inhaler                                       | 0.2136  | 0.0642 | 3.3285  | 0.0009   |
| UKB   | Treatment/medication code: ranitidine                                                           | 0.3567  | 0.1075 | 3.3194  | 0.0009   |
| UKB   | Diagnoses - main ICD10: G47 Sleep disorders                                                     | 0.3501  | 0.1051 | 3.3315  | 0.0009   |
| UKB   | Treatment/medication code: gabapentin                                                           | 0.4743  | 0.1438 | 3.2994  | 0.001    |

|       |                                                                                             |         |        |         |        |
|-------|---------------------------------------------------------------------------------------------|---------|--------|---------|--------|
| UKB   | Treatment/medication code: dihydrocodeine                                                   | 0.4321  | 0.1314 | 3.2883  | 0.001  |
| UKB   | Treatment/medication code: furosemide                                                       | 0.4739  | 0.1439 | 3.2937  | 0.001  |
| LDHUB | PGC cross-disorder analysis                                                                 | 0.1947  | 0.0594 | 3.2769  | 0.001  |
| UKB   | Reason for reducing amount of alcohol drunk: Financial reasons                              | 0.6627  | 0.2036 | 3.2554  | 0.0011 |
| UKB   | Transport type for commuting to job workplace: Car/motor vehicle                            | 0.2466  | 0.0753 | 3.2733  | 0.0011 |
| UKB   | Medication for pain relief, constipation, heartburn: Aspirin                                | 0.1883  | 0.0578 | 3.2595  | 0.0011 |
| LDHUB | Body fat                                                                                    | 0.1729  | 0.0532 | 3.2496  | 0.0012 |
| UKB   | Diagnoses - main ICD10: I20 Angina pectoris                                                 | 0.2613  | 0.0817 | 3.2006  | 0.0014 |
| UKB   | Hearing difficulty/problems with background noise                                           | 0.1397  | 0.0439 | 3.1823  | 0.0015 |
| UKB   | Treatment/medication code: propranolol                                                      | 0.468   | 0.1472 | 3.1798  | 0.0015 |
| UKB   | Hand grip strength (left)                                                                   | -0.1114 | 0.0353 | -3.152  | 0.0016 |
| UKB   | Medication for cholesterol, blood pressure, diabetes, or take exogenous hormones: Blood pr  | 0.1286  | 0.0409 | 3.1477  | 0.0016 |
| UKB   | Diagnoses - main ICD10: G56 Mononeuropathies of upper limb                                  | 0.2362  | 0.0749 | 3.1533  | 0.0016 |
| UKB   | Diagnoses - main ICD10: K20 Oesophagitis                                                    | 0.5627  | 0.1788 | 3.1471  | 0.0016 |
| UKB   | Mouth/teeth dental problems: Bleeding gums                                                  | 0.1951  | 0.0623 | 3.1324  | 0.0017 |
| UKB   | Arm predicted mass (right)                                                                  | 0.0885  | 0.0284 | 3.1147  | 0.0018 |
| UKB   | Treatment/medication code: aspirin                                                          | 0.1923  | 0.0615 | 3.1241  | 0.0018 |
| UKB   | Diagnoses - main ICD10: N92 Excessive, frequent and irregular menstruation                  | 0.3076  | 0.0985 | 3.1214  | 0.0018 |
| UKB   | Vitamin and mineral supplements: Vitamin B                                                  | 0.3045  | 0.0981 | 3.1034  | 0.0019 |
| UKB   | Mineral and other dietary supplements: None of the above                                    | 0.1712  | 0.0551 | 3.1085  | 0.0019 |
| UKB   | Diagnoses - main ICD10: M70 Soft tissue disorders related to use, overuse and pressure      | 0.4006  | 0.129  | 3.1046  | 0.0019 |
| LDHUB | Triglycerides                                                                               | 0.1165  | 0.0376 | 3.099   | 0.0019 |
| LDHUB | Mothers age at death                                                                        | -0.2419 | 0.078  | -3.1015 | 0.0019 |
| UKB   | Non-cancer illness code, self-reported: diabetes                                            | 0.1415  | 0.0458 | 3.0855  | 0.002  |
| UKB   | Treatment/medication code: codeine                                                          | 0.4651  | 0.1522 | 3.0558  | 0.0022 |
| LDHUB | Childhood obesity                                                                           | 0.1852  | 0.0605 | 3.0592  | 0.0022 |
| UKB   | Blood clot, DVT, bronchitis, emphysema, asthma, rhinitis, eczema, allergy diagnosed by doct | -0.1084 | 0.0356 | -3.0482 | 0.0023 |
| UKB   | Neck/shoulder pain for 3+ months                                                            | 0.4561  | 0.1505 | 3.0311  | 0.0024 |
| UKB   | Impedance of whole body                                                                     | -0.0863 | 0.0286 | -3.0204 | 0.0025 |
| UKB   | Chest pain or discomfort when walking uphill or hurrying                                    | 0.53    | 0.1759 | 3.0137  | 0.0026 |
| UKB   | Diagnoses - main ICD10: M24 Other specific joint derangements                               | 0.4691  | 0.1556 | 3.0144  | 0.0026 |
| UKB   | Headaches for 3+ months                                                                     | 0.2086  | 0.0694 | 3.0056  | 0.0027 |
| LDHUB | Coronary artery disease                                                                     | 0.1385  | 0.0462 | 2.9977  | 0.0027 |
| UKB   | Current employment status: Unemployed                                                       | 0.3068  | 0.1025 | 2.9935  | 0.0028 |
| LDHUB | Height; Females at age 10 and males at age 12                                               | -0.1571 | 0.0526 | -2.9868 | 0.0028 |
| UKB   | Hearing difficulty/problems: Yes                                                            | 0.1334  | 0.0448 | 2.9767  | 0.0029 |
| LDHUB | Lung cancer (squamous cell)                                                                 | 0.5403  | 0.1817 | 2.9743  | 0.0029 |
| UKB   | Non-cancer illness code, self-reported: high cholesterol                                    | 0.1501  | 0.0505 | 2.9709  | 0.003  |
| UKB   | Current employment status: Looking after home and/or family                                 | -0.2997 | 0.101  | -2.9682 | 0.003  |
| UKB   | Diagnoses - main ICD10: K21 Gastro-oesophageal reflux disease                               | 0.3735  | 0.126  | 2.9648  | 0.003  |
| UKB   | Hair/balding pattern: Pattern 3                                                             | -0.1604 | 0.0542 | -2.9578 | 0.0031 |
| UKB   | Diagnoses - main ICD10: N81 Female genital prolapse                                         | 0.2811  | 0.095  | 2.9592  | 0.0031 |
| UKB   | Arm fat-free mass (right)                                                                   | 0.0842  | 0.0286 | 2.9454  | 0.0032 |
| UKB   | Diagnoses - main ICD10: K57 Diverticular disease of intestine                               | 0.194   | 0.0661 | 2.9342  | 0.0033 |
| UKB   | Transport type for commuting to job workplace: Walk                                         | -0.2402 | 0.0821 | -2.9275 | 0.0034 |
| UKB   | Diagnoses - main ICD10: K30 Dyspepsia                                                       | 0.7571  | 0.2596 | 2.9168  | 0.0035 |
| UKB   | Non-cancer illness code, self-reported: endometriosis                                       | 0.6087  | 0.2088 | 2.9149  | 0.0036 |
| UKB   | Illnesses of siblings: High blood pressure                                                  | 0.1451  | 0.0498 | 2.9142  | 0.0036 |
| LDHUB | Lung adenocarcinoma                                                                         | 0.3771  | 0.1302 | 2.8966  | 0.0038 |
| UKB   | Non-cancer illness code, self-reported: diverticular disease/diverticulitis                 | 0.2015  | 0.0697 | 2.8899  | 0.0039 |
| UKB   | Treatment/medication code: salbutamol 100micrograms spacehaler                              | 0.3067  | 0.1066 | 2.876   | 0.004  |
| UKB   | Why stopped smoking: None of the above                                                      | 0.2417  | 0.0847 | 2.8523  | 0.0043 |
| UKB   | Birth weight of first child                                                                 | -0.1149 | 0.0404 | -2.8478 | 0.0044 |
| UKB   | Number of depression episodes                                                               | 0.3898  | 0.137  | 2.8457  | 0.0044 |
| UKB   | Illnesses of mother: Diabetes                                                               | 0.1782  | 0.0628 | 2.84    | 0.0045 |
| UKB   | Smoking status: Previous                                                                    | 0.1329  | 0.0469 | 2.8326  | 0.0046 |
| LDHUB | Extreme bmi                                                                                 | 0.1616  | 0.0573 | 2.8191  | 0.0048 |
| UKB   | Diagnoses - main ICD10: T81 Complications of procedures, not elsewhere classified           | 0.3991  | 0.142  | 2.811   | 0.0049 |
| UKB   | Treatment/medication code: symbicort 100/6 turbohaler                                       | 0.4509  | 0.1605 | 2.8094  | 0.005  |
| UKB   | Relative age voice broke                                                                    | -0.1357 | 0.0486 | -2.7909 | 0.0053 |
| UKB   | Mouth/teeth dental problems: Mouth ulcers                                                   | 0.1456  | 0.0522 | 2.7899  | 0.0053 |
| UKB   | Family relationship satisfaction                                                            | 0.1736  | 0.0623 | 2.7844  | 0.0054 |
| UKB   | Diagnoses - main ICD10: R55 Syncope and collapse                                            | 0.2607  | 0.0937 | 2.7817  | 0.0054 |

|       |                                                                                              |         |        |         |        |
|-------|----------------------------------------------------------------------------------------------|---------|--------|---------|--------|
| UKB   | Non-cancer illness code, self-reported: hypothyroidism/myxoedema                             | 0.1172  | 0.0423 | 2.7728  | 0.0056 |
| UKB   | Illnesses of siblings: Lung cancer                                                           | 0.3926  | 0.1418 | 2.7695  | 0.0056 |
| UKB   | Diagnoses - main ICD10: K22 Other diseases of oesophagus                                     | 0.5018  | 0.1821 | 2.7555  | 0.0059 |
| UKB   | Basal metabolic rate                                                                         | 0.0782  | 0.0286 | 2.7374  | 0.0062 |
| UKB   | Pulse rate                                                                                   | 0.1131  | 0.0417 | 2.7139  | 0.0066 |
| UKB   | Diagnoses - main ICD10: Z03 Medical observation and evaluation for suspected diseases and    | 0.3583  | 0.1323 | 2.7077  | 0.0068 |
| UKB   | Diagnoses - main ICD10: K60 Fissure and fistula of anal and rectal regions                   | 0.3399  | 0.1261 | 2.6956  | 0.007  |
| UKB   | Diagnoses - main ICD10: K80 Cholelithiasis                                                   | 0.2413  | 0.0895 | 2.6954  | 0.007  |
| LDHUB | Age at Menopause                                                                             | -0.1389 | 0.0516 | -2.6914 | 0.0071 |
| UKB   | Treatment/medication code: co-dydramol                                                       | 0.5905  | 0.2198 | 2.687   | 0.0072 |
| UKB   | Treatment/medication code: ezetimibe                                                         | 0.3262  | 0.1225 | 2.6629  | 0.0077 |
| UKB   | Why reduced smoking: Illness or ill health                                                   | 0.4168  | 0.1564 | 2.6658  | 0.0077 |
| UKB   | Number of cigarettes currently smoked daily (current cigarette smokers)                      | 0.262   | 0.0986 | 2.6559  | 0.0079 |
| UKB   | Treatment/medication code: quinine                                                           | 0.2578  | 0.0974 | 2.6469  | 0.0081 |
| UKB   | Number of unsuccessful stop-smoking attempts                                                 | 0.2067  | 0.0782 | 2.6429  | 0.0082 |
| UKB   | Non-cancer illness code, self-reported: irritable bowel syndrome                             | 0.3174  | 0.1209 | 2.6263  | 0.0086 |
| LDHUB | Overweight                                                                                   | 0.1126  | 0.0428 | 2.6278  | 0.0086 |
| UKB   | Forced expiratory volume in 1-second (FEV1), predicted                                       | -0.1109 | 0.0423 | -2.6229 | 0.0087 |
| UKB   | Diagnoses - main ICD10: K62 Other diseases of anus and rectum                                | 0.328   | 0.1254 | 2.615   | 0.0089 |
| UKB   | Time employed in main current job                                                            | -0.2399 | 0.0921 | -2.606  | 0.0092 |
| LDHUB | Amyotrophic lateral sclerosis                                                                | 0.3485  | 0.1347 | 2.5874  | 0.0097 |
| UKB   | Treatment/medication code: atorvastatin                                                      | 0.174   | 0.0674 | 2.5801  | 0.0099 |
| UKB   | Diagnoses - main ICD10: R06 Abnormalities of breathing                                       | 0.4828  | 0.1871 | 2.5806  | 0.0099 |
| UKB   | Loud music exposure frequency                                                                | 0.2047  | 0.0805 | 2.5447  | 0.0109 |
| UKB   | Treatment/medication code: ramipril                                                          | 0.1568  | 0.0616 | 2.5452  | 0.0109 |
| UKB   | Treatment/medication code: bendroflumethiazide                                               | 0.1201  | 0.0477 | 2.5203  | 0.0117 |
| UKB   | Treatment/medication code: temazepam                                                         | 0.3962  | 0.1574 | 2.5163  | 0.0119 |
| UKB   | Reason for reducing amount of alcohol drunk: Doctor's advice                                 | 0.4418  | 0.176  | 2.5102  | 0.0121 |
| UKB   | Diagnoses - main ICD10: R69 Unknown and unspecified causes of morbidity                      | 0.2648  | 0.1055 | 2.5106  | 0.0121 |
| UKB   | Reason for reducing amount of alcohol drunk: Illness or ill health                           | 0.3558  | 0.142  | 2.5058  | 0.0122 |
| UKB   | Diagnoses - main ICD10: K44 Diaphragmatic hernia                                             | 0.3624  | 0.1447 | 2.5038  | 0.0123 |
| UKB   | Leg pain when standing still or sitting                                                      | 0.6619  | 0.2648 | 2.4993  | 0.0124 |
| UKB   | Tinnitus: Yes, now most or all of the time                                                   | 0.1929  | 0.0772 | 2.5     | 0.0124 |
| UKB   | Handedness (chirality/laterality): Use both right and left hands equally                     | 0.3065  | 0.123  | 2.4915  | 0.0127 |
| UKB   | Diagnoses - main ICD10: I83 Varicose veins of lower extremities                              | 0.1801  | 0.0723 | 2.4913  | 0.0127 |
| UKB   | Treatment/medication code: glucosamine product                                               | -0.2105 | 0.0846 | -2.4891 | 0.0128 |
| LDHUB | Lumbar Spine bone mineral density                                                            | -0.1645 | 0.0662 | -2.4846 | 0.013  |
| UKB   | Started insulin within one year diagnosis of diabetes                                        | -0.203  | 0.0819 | -2.4801 | 0.0131 |
| UKB   | Treatment/medication code: loratadine                                                        | 0.3133  | 0.1267 | 2.473   | 0.0134 |
| LDHUB | Celiac disease                                                                               | -0.1897 | 0.0773 | -2.4551 | 0.0141 |
| UKB   | Non-cancer illness code, self-reported: headaches (not migraine)                             | 0.6028  | 0.2458 | 2.4529  | 0.0142 |
| UKB   | Treatment/medication code: amlodipine                                                        | 0.1334  | 0.0545 | 2.4472  | 0.0144 |
| UKB   | Diagnoses - main ICD10: K52 Other non-infective gastro-enteritis and colitis                 | 0.2692  | 0.11   | 2.448   | 0.0144 |
| UKB   | Diagnoses - main ICD10: I84 Haemorrhoids                                                     | 0.2108  | 0.0862 | 2.445   | 0.0145 |
| UKB   | Non-cancer illness code, self-reported: cervical spondylosis                                 | 0.3723  | 0.1524 | 2.4429  | 0.0146 |
| UKB   | Illnesses of father: Severe depression                                                       | 0.3026  | 0.124  | 2.4397  | 0.0147 |
| UKB   | Non-cancer illness code, self-reported: gastric/stomach ulcers                               | 0.4866  | 0.2003 | 2.4289  | 0.0151 |
| UKB   | Treatment/medication code: venlafaxine                                                       | 0.3863  | 0.1592 | 2.4262  | 0.0153 |
| UKB   | Treatment/medication code: spiriva 18micrograms inhalation capsule                           | 0.3212  | 0.1328 | 2.4187  | 0.0156 |
| UKB   | Non-cancer illness code, self-reported: bladder problem (not cancer)                         | 0.3488  | 0.1459 | 2.3904  | 0.0168 |
| UKB   | Non-cancer illness code, self-reported: uterine fibroids                                     | 0.2346  | 0.0982 | 2.3901  | 0.0168 |
| UKB   | Diagnoses - main ICD10: T84 Complications of internal orthopaedic prosthetic devices, implar | 0.2685  | 0.1126 | 2.3848  | 0.0171 |
| UKB   | Diagnoses - main ICD10: T43 Poisoning by psychotropic drugs, not elsewhere classified        | 0.6075  | 0.2549 | 2.3833  | 0.0172 |
| UKB   | Duration of light DIY                                                                        | 0.164   | 0.069  | 2.3775  | 0.0174 |
| UKB   | Non-cancer illness code, self-reported: cholelithiasis/gall stones                           | 0.238   | 0.1001 | 2.3772  | 0.0174 |
| UKB   | Ever had breast cancer screening / mammogram                                                 | -0.265  | 0.1115 | -2.3764 | 0.0175 |
| UKB   | Treatment/medication code: reductil 10mg capsule                                             | 0.5294  | 0.2236 | 2.3673  | 0.0179 |
| UKB   | Treatment/medication code: tiotropium                                                        | 0.4108  | 0.1737 | 2.3655  | 0.018  |
| LDHUB | Fasting glucose main effect                                                                  | 0.146   | 0.0618 | 2.3606  | 0.0182 |
| UKB   | Mineral and other dietary supplements: Fish oil (including cod liver oil)                    | -0.1348 | 0.0573 | -2.3526 | 0.0186 |
| UKB   | Diagnoses - main ICD10: K76 Other diseases of liver                                          | 0.5381  | 0.2289 | 2.3506  | 0.0187 |
| UKB   | Diagnoses - main ICD10: M23 Internal derangement of knee                                     | 0.2347  | 0.0999 | 2.3483  | 0.0189 |
| UKB   | Medication for cholesterol, blood pressure or diabetes: Blood pressure medication            | 0.1097  | 0.0468 | 2.3446  | 0.019  |



|       |                                                                                             |         |        |         |        |
|-------|---------------------------------------------------------------------------------------------|---------|--------|---------|--------|
| UKB   | Non-cancer illness code, self-reported: back problem                                        | 0.2976  | 0.1271 | 2.3411  | 0.0192 |
| UKB   | Leg fat-free mass (left)                                                                    | 0.0673  | 0.0289 | 2.3258  | 0.02   |
| UKB   | Chest pain felt during physical activity                                                    | 0.5723  | 0.2462 | 2.3248  | 0.0201 |
| UKB   | Tinnitus: Yes, now a lot of the time                                                        | 0.2822  | 0.1214 | 2.3248  | 0.0201 |
| UKB   | Diagnoses - main ICD10: M19 Other arthrosis                                                 | 0.4512  | 0.1941 | 2.3249  | 0.0201 |
| UKB   | Treatment/medication code: buprenorphine                                                    | 0.5547  | 0.2387 | 2.3234  | 0.0202 |
| UKB   | Manic/hyper symptoms: I was more active than usual                                          | 0.5095  | 0.2196 | 2.3198  | 0.0203 |
| UKB   | Treatment/medication code: enalapril                                                        | 0.2523  | 0.1088 | 2.318   | 0.0204 |
| UKB   | Treatment/medication code: levothyroxine sodium                                             | 0.1063  | 0.0459 | 2.3125  | 0.0207 |
| UKB   | Diagnoses - main ICD10: C18 Malignant neoplasm of colon                                     | 0.3002  | 0.1298 | 2.3133  | 0.0207 |
| UKB   | Non-cancer illness code, self-reported: chronic fatigue syndrome                            | 0.3419  | 0.148  | 2.3097  | 0.0209 |
| UKB   | Diagnoses - main ICD10: M77 Other enthesopathies                                            | 0.4808  | 0.2082 | 2.3093  | 0.0209 |
| UKB   | Diagnoses - main ICD10: N64 Other disorders of breast                                       | 0.4214  | 0.183  | 2.3028  | 0.0213 |
| UKB   | Diagnoses - main ICD10: T39 Poisoning by nonopioid analgesics, antipyretics and antirheumal | 0.7702  | 0.3346 | 2.3018  | 0.0213 |
| UKB   | Average weekly spirits intake                                                               | 0.1436  | 0.0624 | 2.2999  | 0.0215 |
| UKB   | Leg predicted mass (left)                                                                   | 0.0664  | 0.029  | 2.2923  | 0.0219 |
| UKB   | Underlying (primary) cause of death: ICD10: J45.9 Asthma, unspecified                       | 0.3491  | 0.1526 | 2.2882  | 0.0221 |
| UKB   | Treatment/medication code: xalatan 0.005% eye drops                                         | -0.2178 | 0.0952 | -2.2878 | 0.0222 |
| UKB   | Able to walk or cycle unaided for 10 minutes                                                | -0.4977 | 0.2178 | -2.2844 | 0.0223 |
| LDHUB | Forced expiratory volume in 1 second (FEV1)                                                 | -0.1336 | 0.0586 | -2.2789 | 0.0227 |
| UKB   | Duration of fitness test                                                                    | -0.3235 | 0.1424 | -2.2716 | 0.0231 |
| UKB   | Cancer code, self-reported: cervical cancer                                                 | 0.2478  | 0.1092 | 2.2702  | 0.0232 |
| LDHUB | Cigarettes smoked per day                                                                   | 0.2466  | 0.1086 | 2.2699  | 0.0232 |
| UKB   | Alcohol drinker status: Never                                                               | 0.1549  | 0.0683 | 2.2671  | 0.0234 |
| UKB   | Reason for glasses/contact lenses: For 'astigmatism'                                        | -0.1842 | 0.0813 | -2.2664 | 0.0234 |
| UKB   | Relative age of first facial hair                                                           | -0.0988 | 0.044  | -2.2446 | 0.0248 |
| UKB   | Treatment/medication code: simvastatin                                                      | 0.1157  | 0.0516 | 2.2435  | 0.0249 |
| UKB   | Daytime dozing / sleeping (narcolepsy)                                                      | 0.0953  | 0.0426 | 2.2369  | 0.0253 |
| UKB   | Vascular/heart problems diagnosed by doctor: Heart attack                                   | 0.141   | 0.063  | 2.2368  | 0.0253 |
| UKB   | Morning/evening person (chronotype)                                                         | -0.0821 | 0.0368 | -2.2307 | 0.0257 |
| UKB   | Treatment/medication code: gtn 400micrograms spray                                          | 0.2642  | 0.1185 | 2.2301  | 0.0257 |
| UKB   | Home area population density - urban or rural: England/Wales - Village - less sparse        | -0.6469 | 0.2903 | -2.2284 | 0.0259 |
| LDHUB | Citrate                                                                                     | -0.2432 | 0.1096 | -2.2191 | 0.0265 |
| LDHUB | Asthma                                                                                      | 0.2066  | 0.0935 | 2.2096  | 0.0271 |
| UKB   | Treatment/medication code: evorel 25 patch                                                  | 0.3551  | 0.1626 | 2.1831  | 0.029  |
| UKB   | Leg pain on walking : effect of standing still                                              | -0.7184 | 0.3299 | -2.1772 | 0.0295 |
| UKB   | Frequency of light DIY in last 4 weeks                                                      | 0.1798  | 0.0826 | 2.1758  | 0.0296 |
| UKB   | Treatment/medication code: Free-text entry, unable to be coded                              | 0.2828  | 0.1305 | 2.1676  | 0.0302 |
| UKB   | Stomach/abdominal pain for 3+ months                                                        | 0.4814  | 0.2223 | 2.1657  | 0.0303 |
| UKB   | Non-cancer illness code, self-reported: heart attack/myocardial infarction                  | 0.1333  | 0.0625 | 2.1329  | 0.0329 |
| UKB   | Diagnoses - main ICD10: Z46 Fitting and adjustment of other devices                         | 0.2794  | 0.1313 | 2.1278  | 0.0334 |
| UKB   | Diagnoses - main ICD10: I26 Pulmonary embolism                                              | 0.375   | 0.1766 | 2.124   | 0.0337 |
| UKB   | Treatment/medication code: isosorbide mononitrate                                           | 0.239   | 0.1126 | 2.123   | 0.0338 |
| UKB   | Illnesses of siblings: Stroke                                                               | 0.4765  | 0.2244 | 2.1229  | 0.0338 |
| UKB   | Treatment/medication code: paroxetine                                                       | 0.4133  | 0.1963 | 2.1054  | 0.0353 |
| UKB   | Diagnoses - main ICD10: H53 Visual disturbances                                             | 0.2807  | 0.1334 | 2.1039  | 0.0354 |
| UKB   | Diagnoses - main ICD10: J22 Unspecified acute lower respiratory infection                   | 0.4309  | 0.2056 | 2.0953  | 0.0361 |
| UKB   | Treatment/medication code: hyoscine butylbromide                                            | 0.446   | 0.2129 | 2.0943  | 0.0362 |
| UKB   | Fractured bone site(s): Other bones                                                         | 0.2126  | 0.1021 | 2.0824  | 0.0373 |
| LDHUB | Leptin_not_adjBMI                                                                           | 0.1616  | 0.0781 | 2.0681  | 0.0386 |
| UKB   | Leg pain in calf/calves                                                                     | 0.7097  | 0.3435 | 2.0662  | 0.0388 |
| UKB   | Illnesses of siblings: Prostate cancer                                                      | 0.2465  | 0.1193 | 2.0666  | 0.0388 |
| UKB   | Non-cancer illness code, self-reported: kidney stone/ureter stone/bladder stone             | 0.1691  | 0.0818 | 2.0656  | 0.0389 |
| UKB   | Mineral and other dietary supplements: Calcium                                              | -0.1525 | 0.0739 | -2.0649 | 0.0389 |
| UKB   | Diagnoses - main ICD10: G44 Other headache syndromes                                        | 0.3443  | 0.1667 | 2.0654  | 0.0389 |
| UKB   | Sitting height                                                                              | -0.0573 | 0.0279 | -2.0546 | 0.0399 |
| UKB   | Diagnoses - main ICD10: M48 Other spondylopathies                                           | 0.3494  | 0.1705 | 2.0489  | 0.0405 |
| UKB   | Medication for cholesterol, blood pressure or diabetes: None of the above                   | -0.0987 | 0.0483 | -2.0416 | 0.0412 |
| LDHUB | Forced Vital capacity(FVC)                                                                  | -0.1044 | 0.0513 | -2.0339 | 0.042  |
| UKB   | Treatment/medication code: vitamin b compound tablet                                        | 0.2443  | 0.1203 | 2.0309  | 0.0423 |
| LDHUB | Hip circumference                                                                           | 0.0725  | 0.0357 | 2.0309  | 0.0423 |
| UKB   | Treatment/medication code: aqueous cream bp                                                 | 0.5528  | 0.2725 | 2.0287  | 0.0425 |
| UKB   | Systolic blood pressure, automated reading                                                  | 0.0697  | 0.0346 | 2.0167  | 0.0437 |

|       |                                                                                             |         |        |         |        |
|-------|---------------------------------------------------------------------------------------------|---------|--------|---------|--------|
| UKB   | Type of tobacco previously smoked: Hand-rolled cigarettes                                   | 0.3009  | 0.1494 | 2.0141  | 0.044  |
| UKB   | Non-cancer illness code, self-reported: pneumonia                                           | 0.3119  | 0.1551 | 2.011   | 0.0443 |
| UKB   | Treatment/medication code: clopidogrel                                                      | 0.2735  | 0.1371 | 1.9948  | 0.0461 |
| UKB   | Diagnoses - main ICD10: K02 Dental caries                                                   | 0.4866  | 0.2442 | 1.9925  | 0.0463 |
| UKB   | Non-cancer illness code, self-reported: joint disorder                                      | 0.4538  | 0.2285 | 1.9863  | 0.047  |
| UKB   | Non-cancer illness code, self-reported: cataract                                            | 0.2857  | 0.1439 | 1.9858  | 0.0471 |
| UKB   | Fractured/broken bones in last 5 years                                                      | 0.1368  | 0.069  | 1.9826  | 0.0474 |
| UKB   | Treatment/medication code: cod liver oil capsule                                            | -0.246  | 0.1242 | -1.9807 | 0.0476 |
| UKB   | Diagnoses - main ICD10: N80 Endometriosis                                                   | 0.2541  | 0.1284 | 1.9791  | 0.0478 |
| UKB   | Type of tobacco currently smoked: Hand-rolled cigarettes                                    | 0.3898  | 0.1974 | 1.9742  | 0.0484 |
| UKB   | Treatment/medication code: latanoprost                                                      | 0.2279  | 0.116  | 1.9642  | 0.0495 |
| UKB   | Part of a multiple birth                                                                    | 0.3237  | 0.1648 | 1.9638  | 0.0496 |
| UKB   | Diagnoses - main ICD10: N20 Calculus of kidney and ureter                                   | 0.1679  | 0.086  | 1.9513  | 0.051  |
| LDHUB | Rheumatoid Arthritis                                                                        | 0.1083  | 0.0555 | 1.951   | 0.0511 |
| UKB   | Treatment/medication code: pioglitazone                                                     | 0.2055  | 0.1057 | 1.9444  | 0.0518 |
| UKB   | Cancer code, self-reported: testicular cancer                                               | 0.2812  | 0.1448 | 1.9414  | 0.0522 |
| UKB   | Treatment/medication code: clonidine                                                        | 0.3326  | 0.1715 | 1.9389  | 0.0525 |
| UKB   | Non-cancer illness code, self-reported: urinary frequency / incontinence                    | 0.2687  | 0.1389 | 1.9347  | 0.053  |
| UKB   | Current employment status: Retired                                                          | -0.1638 | 0.0849 | -1.9295 | 0.0537 |
| UKB   | Ever had prostate specific antigen (PSA) test                                               | -0.1272 | 0.066  | -1.9269 | 0.054  |
| UKB   | Illnesses of father: Bowel cancer                                                           | 0.2817  | 0.1464 | 1.9249  | 0.0542 |
| UKB   | Tinnitus: Yes, now some of the time                                                         | 0.4947  | 0.2573 | 1.9228  | 0.0545 |
| LDHUB | Difference in height between adolescence and adulthood; age 14                              | 0.2034  | 0.1058 | 1.9231  | 0.0545 |
| UKB   | Friendships satisfaction                                                                    | 0.1127  | 0.0588 | 1.9159  | 0.0554 |
| UKB   | Treatment/medication code: esomeprazole                                                     | 0.466   | 0.2436 | 1.9129  | 0.0558 |
| UKB   | Diagnoses - main ICD10: O42 Premature rupture of membranes                                  | -0.5536 | 0.2896 | -1.9115 | 0.0559 |
| LDHUB | Primary sclerosing cholangitis                                                              | -0.1316 | 0.0688 | -1.9118 | 0.0559 |
| LDHUB | Infant head circumference                                                                   | -0.1818 | 0.0952 | -1.9094 | 0.0562 |
| UKB   | Likelihood of resuming smoking                                                              | -0.4058 | 0.2129 | -1.9061 | 0.0566 |
| LDHUB | 22:6 docosahexaenoic acid                                                                   | -0.1941 | 0.1021 | -1.9013 | 0.0573 |
| UKB   | Fractured bone site(s): Ankle                                                               | 0.1799  | 0.0948 | 1.8981  | 0.0577 |
| UKB   | Diagnoses - main ICD10: O75 Other complications of labour and delivery, not elsewhere class | 0.2728  | 0.1441 | 1.8935  | 0.0583 |
| UKB   | Fractured bone site(s): Spine                                                               | 0.3185  | 0.1692 | 1.8818  | 0.0599 |
| UKB   | Treatment/medication code: antihistamine 60mg tablet                                        | 0.3555  | 0.189  | 1.8807  | 0.06   |
| UKB   | Diagnoses - main ICD10: D17 Benign lipomatous neoplasm                                      | 0.2702  | 0.144  | 1.8765  | 0.0606 |
| LDHUB | Mean Caudate                                                                                | 0.1512  | 0.0808 | 1.872   | 0.0612 |
| UKB   | Non-cancer illness code, self-reported: alcohol dependency                                  | 0.2693  | 0.1444 | 1.8648  | 0.0622 |
| UKB   | Eye problems/disorders: None of the above                                                   | -0.1591 | 0.0854 | -1.8639 | 0.0623 |
| UKB   | Non-cancer illness code, self-reported: other abdominal problem                             | 0.3944  | 0.2118 | 1.8619  | 0.0626 |
| UKB   | Diagnoses - main ICD10: R23 Other skin changes                                              | 0.2309  | 0.1242 | 1.859   | 0.063  |
| UKB   | Diagnoses - main ICD10: K14 Diseases of tongue                                              | 0.3803  | 0.2047 | 1.8576  | 0.0632 |
| UKB   | Frequency of strenuous sports in last 4 weeks                                               | 0.2636  | 0.1419 | 1.8569  | 0.0633 |
| UKB   | Non-cancer illness code, self-reported: type 2 diabetes                                     | 0.1804  | 0.0972 | 1.856   | 0.0635 |
| UKB   | Diagnoses - main ICD10: F10 Mental and behavioural disorders due to use of alcohol          | 0.2399  | 0.1296 | 1.8517  | 0.0641 |
| UKB   | Leg pain when walking uphill or hurrying                                                    | 0.311   | 0.1688 | 1.8429  | 0.0653 |
| UKB   | Wants to stop smoking                                                                       | -0.5432 | 0.2956 | -1.8377 | 0.0661 |
| UKB   | Non-cancer illness code, self-reported: gall bladder disease                                | 0.4297  | 0.2342 | 1.8347  | 0.0665 |
| UKB   | Non-cancer illness code, self-reported: carpal tunnel syndrome                              | 0.428   | 0.2336 | 1.8319  | 0.067  |
| UKB   | Treatment/medication code: rosiglitazone                                                    | 0.2942  | 0.1607 | 1.8305  | 0.0672 |
| UKB   | Non-cancer illness code, self-reported: diabetic eye disease                                | 0.3347  | 0.1836 | 1.8232  | 0.0683 |
| UKB   | Diagnoses - main ICD10: C34 Malignant neoplasm of bronchus and lung                         | 0.5218  | 0.2866 | 1.8207  | 0.0687 |
| UKB   | Diagnoses - main ICD10: N13 Obstructive and reflux uropathy                                 | 0.3603  | 0.1982 | 1.8175  | 0.0691 |
| UKB   | Diagnoses - main ICD10: J18 Pneumonia, organism unspecified                                 | 0.3239  | 0.1785 | 1.8146  | 0.0696 |
| LDHUB | Heart rate                                                                                  | 0.0973  | 0.0537 | 1.8128  | 0.0699 |
| UKB   | Treatment/medication code: flax oil tablet                                                  | 0.2044  | 0.1131 | 1.8073  | 0.0707 |
| LDHUB | HDL cholesterol                                                                             | -0.0953 | 0.0527 | -1.8068 | 0.0708 |
| UKB   | Types of transport used (excluding work): None of the above                                 | 0.2373  | 0.1314 | 1.8059  | 0.0709 |
| UKB   | Treatment/medication code: doxazosin                                                        | 0.1715  | 0.0951 | 1.804   | 0.0712 |
| UKB   | Non-cancer illness code, self-reported: helicobacter pylori                                 | 0.4651  | 0.2579 | 1.8034  | 0.0713 |
| UKB   | Treatment/medication code: mebeverine                                                       | 0.305   | 0.1693 | 1.8021  | 0.0715 |
| UKB   | Leg fat-free mass (right)                                                                   | 0.051   | 0.0283 | 1.801   | 0.0717 |
| UKB   | Treatment/medication code: diclofenac sodium+misoprostol                                    | 0.2785  | 0.1551 | 1.7958  | 0.0725 |
| UKB   | Getting up in morning                                                                       | -0.0762 | 0.0425 | -1.7956 | 0.0726 |

|       |                                                                                                  |         |        |         |        |
|-------|--------------------------------------------------------------------------------------------------|---------|--------|---------|--------|
| UKB   | Leg predicted mass (right)                                                                       | 0.0505  | 0.0281 | 1.7956  | 0.0726 |
| UKB   | Non-cancer illness code, self-reported: allergy or anaphylactic reaction to drug                 | 0.5564  | 0.3099 | 1.7954  | 0.0726 |
| UKB   | Treatment/medication code: ipratropium                                                           | 0.2897  | 0.1615 | 1.794   | 0.0728 |
| UKB   | Non-cancer illness code, self-reported: migraine                                                 | 0.11    | 0.0618 | 1.7808  | 0.075  |
| UKB   | Treatment/medication code: escitalopram                                                          | 0.2357  | 0.1325 | 1.7791  | 0.0752 |
| UKB   | Diagnoses - main ICD10: M67 Other disorders of synovium and tendon                               | 0.2943  | 0.1662 | 1.7702  | 0.0767 |
| UKB   | Why reduced smoking: Doctor's advice                                                             | 0.727   | 0.4121 | 1.7643  | 0.0777 |
| UKB   | Treatment/medication code: beclometasone                                                         | 0.1812  | 0.1028 | 1.7634  | 0.0778 |
| UKB   | Whole body fat-free mass                                                                         | 0.0499  | 0.0283 | 1.7608  | 0.0783 |
| UKB   | Vitamin and mineral supplements: None of the above                                               | -0.0953 | 0.0542 | -1.759  | 0.0786 |
| UKB   | Father still alive                                                                               | 0.1977  | 0.1129 | 1.7521  | 0.0798 |
| UKB   | Diagnoses - main ICD10: N97 Female infertility                                                   | 0.2691  | 0.1537 | 1.7509  | 0.08   |
| UKB   | Diagnoses - main ICD10: E66 Obesity                                                              | 0.257   | 0.1479 | 1.7379  | 0.0822 |
| UKB   | Fractured bone site(s): Hip                                                                      | 0.2443  | 0.1406 | 1.7372  | 0.0824 |
| UKB   | Diagnoses - main ICD10: C67 Malignant neoplasm of bladder                                        | 0.3278  | 0.1887 | 1.737   | 0.0824 |
| UKB   | Whole body water mass                                                                            | 0.0489  | 0.0282 | 1.7345  | 0.0828 |
| UKB   | Diagnoses - main ICD10: F32 Depressive episode                                                   | 0.4346  | 0.2514 | 1.7285  | 0.0839 |
| UKB   | Non-cancer illness code, self-reported: sciatica                                                 | 0.4983  | 0.2888 | 1.7255  | 0.0844 |
| UKB   | Treatment/medication code: serevent 25mcg inhaler                                                | 0.2422  | 0.1406 | 1.7225  | 0.085  |
| LDHUB | Type 2 Diabetes                                                                                  | 0.102   | 0.0593 | 1.7199  | 0.0854 |
| UKB   | Treatment/medication code: detrusitol 1mg tablet                                                 | 0.2701  | 0.1571 | 1.7187  | 0.0857 |
| LDHUB | Sleep duration                                                                                   | -0.1021 | 0.0595 | -1.7152 | 0.0863 |
| UKB   | Diagnoses - main ICD10: K81 Cholecystitis                                                        | 0.3069  | 0.1797 | 1.7077  | 0.0877 |
| UKB   | Eye problems/disorders: Cataract                                                                 | 0.1495  | 0.0875 | 1.7073  | 0.0878 |
| UKB   | Diagnoses - main ICD10: I86 Varicose veins of other sites                                        | 0.611   | 0.359  | 1.7021  | 0.0887 |
| UKB   | Treatment/medication code: senna                                                                 | 0.409   | 0.2408 | 1.6986  | 0.0894 |
| UKB   | Treatment/medication code: movicol oral powder                                                   | 0.2838  | 0.1671 | 1.6978  | 0.0896 |
| UKB   | Birth weight                                                                                     | -0.0679 | 0.0402 | -1.6889 | 0.0912 |
| UKB   | Diagnoses - main ICD10: J46 Status asthmaticus                                                   | 0.2925  | 0.1732 | 1.689   | 0.0912 |
| UKB   | Vitamin and mineral supplements: Vitamin C                                                       | 0.1196  | 0.071  | 1.6859  | 0.0918 |
| UKB   | Treatment/medication code: elleste-solo 1mg tablet                                               | 0.2502  | 0.1487 | 1.6823  | 0.0925 |
| LDHUB | Forced expiratory volume in 1 second (FEV1)                                                      | -0.086  | 0.0512 | -1.681  | 0.0928 |
| UKB   | Treatment/medication code: salmeterol                                                            | 0.2252  | 0.1344 | 1.6758  | 0.0938 |
| UKB   | Treatment/medication code: chondroitin product                                                   | -0.1881 | 0.1125 | -1.6726 | 0.0944 |
| LDHUB | Child birth length                                                                               | -0.1268 | 0.0758 | -1.6723 | 0.0945 |
| UKB   | Knee pain for 3+ months                                                                          | 0.1616  | 0.0967 | 1.6712  | 0.0947 |
| UKB   | Treatment/medication code: verapamil                                                             | 0.365   | 0.2184 | 1.6713  | 0.0947 |
| UKB   | Average monthly red wine intake                                                                  | -0.2218 | 0.1329 | -1.6682 | 0.0953 |
| UKB   | Diagnoses - main ICD10: N40 Hyperplasia of prostate                                              | -0.1703 | 0.1024 | -1.6623 | 0.0965 |
| UKB   | Diagnoses - main ICD10: M72 Fibroblastic disorders                                               | 0.1258  | 0.0757 | 1.6618  | 0.0966 |
| UKB   | Treatment/medication code: rhinocort 50micrograms nasal spray                                    | 0.2222  | 0.1339 | 1.6595  | 0.097  |
| UKB   | Diagnoses - main ICD10: M50 Cervical disk disorders                                              | 0.5728  | 0.3454 | 1.6585  | 0.0972 |
| UKB   | Treatment/medication code: thiamine preparation                                                  | 0.3209  | 0.1936 | 1.6579  | 0.0973 |
| UKB   | Vitamin and mineral supplements: Vitamin E                                                       | 0.1596  | 0.0963 | 1.6577  | 0.0974 |
| UKB   | Diagnoses - main ICD10: C50 Malignant neoplasm of breast                                         | -0.1332 | 0.0804 | -1.6565 | 0.0976 |
| UKB   | Treatment/medication code: conjugated oestrogens                                                 | 0.2897  | 0.175  | 1.6559  | 0.0977 |
| LDHUB | Fasting insulin main effect                                                                      | 0.119   | 0.072  | 1.6537  | 0.0982 |
| UKB   | Home area population density - urban or rural: Scotland - Large Urban Area                       | -0.2108 | 0.1283 | -1.6431 | 0.1004 |
| UKB   | Reason for glasses/contact lenses: For long-sightedness, i.e. for distance and near, but partici | 0.1308  | 0.0797 | 1.6427  | 0.1004 |
| UKB   | Treatment/medication code: dipyridamole                                                          | 0.2357  | 0.1435 | 1.6419  | 0.1006 |
| UKB   | Treatment/medication code: qvar 50 inhaler                                                       | 0.4195  | 0.2561 | 1.6382  | 0.1014 |
| UKB   | Diagnoses - main ICD10: Z47 Other orthopaedic follow-up care                                     | 0.208   | 0.1272 | 1.6347  | 0.1021 |
| UKB   | Treatment/medication code: polyvinyl alcohol 1% eye drops                                        | 0.4011  | 0.2456 | 1.6329  | 0.1025 |
| UKB   | Diagnoses - main ICD10: R53 Malaise and fatigue                                                  | 0.3322  | 0.2038 | 1.6302  | 0.1031 |
| UKB   | Non-cancer illness code, self-reported: pleurisy                                                 | 0.316   | 0.1939 | 1.6291  | 0.1033 |
| UKB   | Diagnoses - main ICD10: R31 Unspecified haematuria                                               | 0.2555  | 0.1569 | 1.6281  | 0.1035 |
| UKB   | Non-cancer illness code, self-reported: renal failure requiring dialysis                         | 0.2467  | 0.1516 | 1.6275  | 0.1036 |
| UKB   | Number of self-reported cancers                                                                  | 0.1559  | 0.0959 | 1.626   | 0.104  |
| UKB   | Diagnoses - main ICD10: R04 Haemorrhage from respiratory passages                                | 0.8619  | 0.5303 | 1.6251  | 0.1041 |
| UKB   | Years since last cervical smear test                                                             | 0.2179  | 0.1342 | 1.6243  | 0.1043 |
| UKB   | Diagnoses - main ICD10: J34 Other disorders of nose and nasal sinuses                            | 0.3307  | 0.2038 | 1.623   | 0.1046 |
| LDHUB | Serum cystatin c                                                                                 | -0.1037 | 0.064  | -1.619  | 0.1054 |
| UKB   | Non-cancer illness code, self-reported: emphysema                                                | 0.2244  | 0.1387 | 1.6176  | 0.1058 |

|       |                                                                                              |         |        |         |        |
|-------|----------------------------------------------------------------------------------------------|---------|--------|---------|--------|
| UKB   | Diagnoses - main ICD10: O04 Medical abortion                                                 | 0.587   | 0.3634 | 1.6152  | 0.1063 |
| UKB   | Treatment/medication code: rino clenil 50micrograms nasal spray                              | 0.2115  | 0.1311 | 1.6136  | 0.1066 |
| UKB   | Tobacco smoking: Smokes on most or all days                                                  | 0.3042  | 0.1891 | 1.6084  | 0.1078 |
| UKB   | Cancer code, self-reported: kidney/renal cell cancer                                         | 0.3493  | 0.2178 | 1.6039  | 0.1087 |
| UKB   | Blood clot, DVT, bronchitis, emphysema, asthma, rhinitis, eczema, allergy diagnosed by doctc | -0.0582 | 0.0363 | -1.6025 | 0.1091 |
| UKB   | Illnesses of mother: Heart disease                                                           | 0.1215  | 0.0761 | 1.5962  | 0.1104 |
| UKB   | Underlying (primary) cause of death: ICD10: C91.1 Chronic lymphocytic leukaemia              | 0.5084  | 0.3204 | 1.5866  | 0.1126 |
| UKB   | Diagnoses - main ICD10: A04 Other bacterial intestinal infections                            | 0.2781  | 0.1755 | 1.5844  | 0.1131 |
| UKB   | Doctor diagnosed asthma                                                                      | 0.0972  | 0.0614 | 1.5838  | 0.1132 |
| UKB   | Treatment/medication code: trandolapril                                                      | 0.2781  | 0.1759 | 1.581   | 0.1139 |
| UKB   | Treatment/medication code: cyclizine                                                         | 0.3912  | 0.2474 | 1.5809  | 0.1139 |
| LDHUB | 2hr glucose adjusted for BMI                                                                 | 0.1805  | 0.1145 | 1.5764  | 0.1149 |
| UKB   | Treatment/medication code: cinnarizine                                                       | 0.2713  | 0.1723 | 1.5744  | 0.1154 |
| UKB   | Home area population density - urban or rural: Scotland - Other Urban Area                   | -0.2437 | 0.1553 | -1.5691 | 0.1166 |
| UKB   | Treatment/medication code: morphine                                                          | 0.7635  | 0.4866 | 1.569   | 0.1167 |
| UKB   | Diagnoses - main ICD10: M13 Other arthritis                                                  | 0.4594  | 0.294  | 1.5628  | 0.1181 |
| UKB   | Vitamin and mineral supplements: Multivitamins +/- minerals                                  | 0.092   | 0.0589 | 1.5618  | 0.1183 |
| UKB   | Treatment/medication code: candesartan cilexetil                                             | 0.1279  | 0.082  | 1.5601  | 0.1187 |
| UKB   | Non-cancer illness code, self-reported: pernicious anaemia                                   | 0.2169  | 0.1397 | 1.553   | 0.1204 |
| LDHUB | HbA1C                                                                                        | 0.1167  | 0.0751 | 1.5532  | 0.1204 |
| UKB   | Non-cancer illness code, self-reported: gout                                                 | 0.0846  | 0.0546 | 1.5489  | 0.1214 |
| UKB   | Treatment/medication code: fluticasone                                                       | 0.3266  | 0.2113 | 1.5455  | 0.1222 |
| UKB   | Diagnoses - main ICD10: K92 Other diseases of digestive system                               | 0.5209  | 0.3373 | 1.5443  | 0.1225 |
| UKB   | Length of menstrual cycle                                                                    | -0.1306 | 0.0846 | -1.5427 | 0.1229 |
| LDHUB | Creatinine                                                                                   | -0.1269 | 0.0824 | -1.5403 | 0.1235 |
| UKB   | Illnesses of father: High blood pressure                                                     | 0.0944  | 0.0617 | 1.5302  | 0.126  |
| LDHUB | Extreme waist-to-hip ratio                                                                   | 0.1362  | 0.0891 | 1.529   | 0.1263 |
| UKB   | Treatment/medication code: peptac liquid                                                     | 0.483   | 0.3168 | 1.5247  | 0.1273 |
| UKB   | Most recent bowel cancer screening                                                           | 0.1769  | 0.1161 | 1.5238  | 0.1276 |
| UKB   | Treatment/medication code: lipantil micro 67mg capsule                                       | 0.2667  | 0.175  | 1.5235  | 0.1276 |
| UKB   | Treatment/medication code: premarin 625micrograms tablet                                     | 0.3589  | 0.2362 | 1.5194  | 0.1287 |
| UKB   | Treatment/medication code: multivitamin+mineral preparations                                 | -0.2691 | 0.1772 | -1.5184 | 0.1289 |
| UKB   | Number of pregnancy terminations                                                             | 0.1161  | 0.0768 | 1.5124  | 0.1304 |
| UKB   | Reason former drinker stopped drinking alcohol: Financial reasons                            | 0.3571  | 0.2363 | 1.5111  | 0.1308 |
| UKB   | Diagnoses - main ICD10: Z30 Contraceptive management                                         | 0.5129  | 0.3395 | 1.5107  | 0.1309 |
| UKB   | Treatment/medication code: colchicine                                                        | 0.1823  | 0.1213 | 1.5027  | 0.1329 |
| UKB   | Non-cancer illness code, self-reported: ear/vestibular disorder                              | 0.3011  | 0.2006 | 1.5009  | 0.1334 |
| UKB   | Comparative body size at age 10                                                              | -0.0507 | 0.0338 | -1.4992 | 0.1338 |
| LDHUB | Tyrosine                                                                                     | 0.1432  | 0.0956 | 1.4974  | 0.1343 |
| UKB   | Diagnoses - main ICD10: O68 Labour and delivery complicated by foetal stress [distress]      | -0.2242 | 0.1504 | -1.4912 | 0.1359 |
| UKB   | Diagnoses - main ICD10: L50 Urticaria                                                        | 0.2243  | 0.1511 | 1.4843  | 0.1377 |
| UKB   | Treatment/medication code: digoxin                                                           | 0.194   | 0.1314 | 1.4765  | 0.1398 |
| UKB   | Treatment/medication code: sodium cromoglicate                                               | 0.1819  | 0.1238 | 1.4692  | 0.1418 |
| UKB   | Diagnoses - main ICD10: H33 Retinal detachments and breaks                                   | -0.161  | 0.1096 | -1.4682 | 0.142  |
| UKB   | Diagnoses - main ICD10: D16 Benign neoplasm of bone and articular cartilage                  | 0.3295  | 0.2244 | 1.4681  | 0.1421 |
| UKB   | Eye problems/disorders: Diabetes related eye disease                                         | 0.1383  | 0.0943 | 1.4669  | 0.1424 |
| UKB   | Illnesses of mother: None of the above (group 1)                                             | -0.0941 | 0.0642 | -1.4658 | 0.1427 |
| UKB   | Diagnoses - main ICD10: M18 Arthrosis of first carpometacarpal joint                         | 0.436   | 0.2979 | 1.4636  | 0.1433 |
| LDHUB | Primary biliary cirrhosis                                                                    | 0.1196  | 0.0818 | 1.461   | 0.144  |
| LDHUB | Forced Vital capacity(FVC)                                                                   | -0.0801 | 0.0549 | -1.4585 | 0.1447 |
| UKB   | Diagnoses - main ICD10: R11 Nausea and vomiting                                              | 0.7979  | 0.548  | 1.4562  | 0.1453 |
| UKB   | Treatment/medication code: tolterodine l-tartrate                                            | 0.3243  | 0.2227 | 1.4559  | 0.1454 |
| UKB   | Diagnoses - main ICD10: J03 Acute tonsillitis                                                | 0.2516  | 0.1728 | 1.4558  | 0.1454 |
| UKB   | Treatment/medication code: allopurinol                                                       | 0.0736  | 0.0509 | 1.4446  | 0.1486 |
| UKB   | Home area population density - urban or rural: England/Wales - Hamlet and Isolated Dwelling  | -0.2137 | 0.1481 | -1.4424 | 0.1492 |
| UKB   | Vitamin and mineral supplements: Vitamin A                                                   | 0.1908  | 0.1326 | 1.4384  | 0.1503 |
| UKB   | Underlying (primary) cause of death: ICD10: C25.9 Pancreas, unspecified                      | -0.2581 | 0.1798 | -1.436  | 0.151  |
| UKB   | Which eye(s) affected by astigmatism: Right eye                                              | 0.1522  | 0.1061 | 1.4338  | 0.1516 |
| UKB   | Treatment/medication code: beconase 50micrograms nasal spray                                 | -0.2422 | 0.1692 | -1.4316 | 0.1523 |
| UKB   | Diagnoses - main ICD10: C69 Malignant neoplasm of eye and adnexa                             | -0.3104 | 0.217  | -1.4306 | 0.1526 |
| LDHUB | Age of smoking initiation                                                                    | -0.1746 | 0.1221 | -1.4303 | 0.1526 |
| UKB   | Treatment/medication code: salmeterol+fluticasone propionate                                 | 0.4381  | 0.3067 | 1.4286  | 0.1531 |
| UKB   | Treatment/medication code: oilatum cream                                                     | 0.2194  | 0.1536 | 1.4284  | 0.1532 |

|       |                                                                                              |         |        |         |        |
|-------|----------------------------------------------------------------------------------------------|---------|--------|---------|--------|
| UKB   | Diagnoses - main ICD10: C15 Malignant neoplasm of oesophagus                                 | 0.1847  | 0.1294 | 1.4272  | 0.1535 |
| UKB   | Diagnoses - main ICD10: O20 Haemorrhage in early pregnancy                                   | 0.3873  | 0.2715 | 1.4265  | 0.1537 |
| UKB   | Manic/hyper symptoms: I needed less sleep than usual                                         | 0.3766  | 0.2642 | 1.4251  | 0.1541 |
| UKB   | Non-cancer illness code, self-reported: spinal injury                                        | 0.204   | 0.1432 | 1.4248  | 0.1542 |
| UKB   | Doctor diagnosed COPD (chronic obstructive pulmonary disease)                                | 0.4738  | 0.3326 | 1.4244  | 0.1543 |
| UKB   | Non-cancer illness code, self-reported: post-natal depression                                | 0.3235  | 0.2271 | 1.4246  | 0.1543 |
| LDHUB | Triglycerides in chylomicrons and largest VLDL particles                                     | -0.13   | 0.0918 | -1.4156 | 0.1569 |
| UKB   | Diagnoses - main ICD10: I10 Essential (primary) hypertension                                 | 0.3354  | 0.2377 | 1.4111  | 0.1582 |
| UKB   | Treatment/medication code: beclazone 50 inhaler                                              | 0.1682  | 0.1195 | 1.4077  | 0.1592 |
| UKB   | Treatment/medication code: co-tenidone                                                       | -0.2407 | 0.1711 | -1.4068 | 0.1595 |
| UKB   | Diagnoses - main ICD10: E87 Other disorders of fluid, electrolyte and acid-base balance      | 0.4155  | 0.2961 | 1.4033  | 0.1605 |
| UKB   | Diagnoses - main ICD10: K58 Irritable bowel syndrome                                         | 0.6775  | 0.4831 | 1.4022  | 0.1609 |
| UKB   | Underlying (primary) cause of death: ICD10: C73 Malignant neoplasm of thyroid gland          | 0.1821  | 0.13   | 1.4016  | 0.161  |
| UKB   | Non-cancer illness code, self-reported: ankylosing spondylitis                               | 0.2557  | 0.1828 | 1.399   | 0.1618 |
| LDHUB | Phospholipids in very large VLDL                                                             | -0.1233 | 0.0883 | -1.3967 | 0.1625 |
| UKB   | Diagnoses - main ICD10: R05 Cough                                                            | 0.2317  | 0.1662 | 1.394   | 0.1633 |
| UKB   | Diagnoses - main ICD10: G43 Migraine                                                         | 0.2569  | 0.1844 | 1.3936  | 0.1634 |
| UKB   | Treatment/medication code: trospium                                                          | 0.3872  | 0.2786 | 1.39    | 0.1645 |
| LDHUB | Lumbar spine bone mineral density                                                            | -0.0722 | 0.0519 | -1.3895 | 0.1647 |
| LDHUB | Systemic lupus erythematosus                                                                 | 0.09    | 0.0649 | 1.3867  | 0.1655 |
| UKB   | Pace-maker                                                                                   | 0.266   | 0.1926 | 1.3813  | 0.1672 |
| UKB   | Diagnoses - main ICD10: L72 Follicular cysts of skin and subcutaneous tissue                 | 0.2117  | 0.1536 | 1.3782  | 0.1681 |
| UKB   | Diagnoses - main ICD10: K63 Other diseases of intestine                                      | 0.3773  | 0.2738 | 1.3778  | 0.1683 |
| LDHUB | Forced expiratory volume in 1 second (FEV1)/Forced Vital capacity(FVC)                       | -0.0864 | 0.0629 | -1.3743 | 0.1694 |
| UKB   | Diagnoses - main ICD10: R47 Speech disturbances, not elsewhere classified                    | 0.3795  | 0.2765 | 1.3724  | 0.1699 |
| UKB   | Diagnoses - main ICD10: T50 Poisoning by diuretics and other and unspecified drugs, medicar  | 0.1743  | 0.1271 | 1.3716  | 0.1702 |
| UKB   | Diagnoses - main ICD10: N76 Other inflammation of vagina and vulva                           | 0.3601  | 0.2628 | 1.3703  | 0.1706 |
| UKB   | Non-cancer illness code, self-reported: tennis elbow / lateral epicondylitis                 | 0.1703  | 0.1248 | 1.3648  | 0.1723 |
| LDHUB | Total lipids in small HDL                                                                    | 0.2048  | 0.1501 | 1.3646  | 0.1724 |
| UKB   | Treatment/medication code: salamol 100micrograms inhaler                                     | 0.2054  | 0.1511 | 1.3596  | 0.1739 |
| LDHUB | Acetate                                                                                      | -0.1804 | 0.1329 | -1.3574 | 0.1746 |
| UKB   | Diagnoses - main ICD10: M10 Gout                                                             | 0.2854  | 0.2107 | 1.3548  | 0.1755 |
| UKB   | Diagnoses - main ICD10: L97 Ulcer of lower limb, not elsewhere classified                    | -0.4485 | 0.3321 | -1.3503 | 0.1769 |
| UKB   | Treatment/medication code: spironolactone                                                    | 0.2071  | 0.1534 | 1.3501  | 0.177  |
| LDHUB | Glycoprotein acetyls; mainly a1-acid glycoprotein                                            | 0.1182  | 0.0876 | 1.3488  | 0.1774 |
| UKB   | Non-cancer illness code, self-reported: meniere's disease                                    | -0.3023 | 0.2243 | -1.348  | 0.1777 |
| UKB   | Non-cancer illness code, self-reported: osteoporosis                                         | 0.0858  | 0.0639 | 1.3436  | 0.1791 |
| UKB   | Treatment/medication code: indoramin                                                         | -0.1786 | 0.1331 | -1.3413 | 0.1798 |
| UKB   | Non-cancer illness code, self-reported: rheumatoid arthritis                                 | 0.1421  | 0.106  | 1.3409  | 0.1799 |
| UKB   | Non-cancer illness code, self-reported: femoral hernia                                       | -0.2894 | 0.2159 | -1.3402 | 0.1802 |
| UKB   | Non-cancer illness code, self-reported: liver/biliary/pancreas problem                       | 0.2421  | 0.1817 | 1.3325  | 0.1827 |
| UKB   | Underlying (primary) cause of death: ICD10: I11.0 Hypertensive heart disease with (congestiv | 0.6098  | 0.458  | 1.3313  | 0.1831 |
| UKB   | Treatment/medication code: kalms tablet                                                      | -0.2394 | 0.1799 | -1.3308 | 0.1832 |
| UKB   | Treatment/medication code: flecainide                                                        | -0.1821 | 0.1368 | -1.3308 | 0.1833 |
| UKB   | Diagnoses - main ICD10: R32 Unspecified urinary incontinence                                 | 0.3421  | 0.2572 | 1.3299  | 0.1835 |
| UKB   | Reason for glasses/contact lenses: Other eye condition                                       | 0.3409  | 0.2569 | 1.3267  | 0.1846 |
| LDHUB | Concentration of very large VLDL particles                                                   | -0.1227 | 0.0926 | -1.3247 | 0.1853 |
| UKB   | Treatment/medication code: lactulose product                                                 | 0.3574  | 0.2702 | 1.3227  | 0.1859 |
| UKB   | Treatment/medication code: amisulpride                                                       | -0.3244 | 0.2457 | -1.3203 | 0.1867 |
| LDHUB | Phenylalanine                                                                                | 0.1649  | 0.1249 | 1.3205  | 0.1867 |
| UKB   | Treatment/medication code: selenium product                                                  | -0.2658 | 0.2017 | -1.3181 | 0.1875 |
| UKB   | Medication for cholesterol, blood pressure or diabetes: Cholesterol lowering medication      | 0.0701  | 0.0533 | 1.3165  | 0.188  |
| UKB   | Treatment/medication code: ciprax 5mg tablet                                                 | 0.3182  | 0.2422 | 1.3137  | 0.1889 |
| LDHUB | Femoral Neck bone mineral density                                                            | -0.0837 | 0.0637 | -1.3139 | 0.1889 |
| LDHUB | Triglycerides in very large HDL                                                              | -0.1421 | 0.1085 | -1.3096 | 0.1903 |
| UKB   | Treatment/medication code: pantoprazole                                                      | 0.1607  | 0.1231 | 1.3063  | 0.1914 |
| UKB   | Treatment/medication code: iron product                                                      | 0.213   | 0.1631 | 1.3056  | 0.1917 |
| UKB   | Frequency of stair climbing in last 4 weeks                                                  | -0.0674 | 0.0518 | -1.3017 | 0.193  |
| UKB   | Treatment/medication code: salbutamol+ipratropium 100micrograms/20micrograms inhaler         | 0.5212  | 0.4013 | 1.2988  | 0.194  |
| LDHUB | Ulcerative colitis                                                                           | -0.0829 | 0.0638 | -1.2983 | 0.1942 |
| UKB   | Non-cancer illness code, self-reported: pulmonary fibrosis                                   | 0.2801  | 0.2161 | 1.2962  | 0.1949 |
| UKB   | Diagnoses - main ICD10: M84 Disorders of continuity of bone                                  | 0.1987  | 0.1536 | 1.2941  | 0.1956 |
| UKB   | Treatment/medication code: chlorphenamine                                                    | 0.2316  | 0.179  | 1.2935  | 0.1958 |

|       |                                                                                                |         |        |         |        |
|-------|------------------------------------------------------------------------------------------------|---------|--------|---------|--------|
| UKB   | Used an inhaler for chest within last hour                                                     | 0.201   | 0.1554 | 1.2933  | 0.1959 |
| UKB   | Diagnoses - main ICD10: G70 Myasthenia gravis and other myoneural disorders                    | -0.5302 | 0.41   | -1.2932 | 0.196  |
| UKB   | Treatment/medication code: indapamide                                                          | -0.1826 | 0.1413 | -1.2924 | 0.1962 |
| LDHUB | Leptin_adjBMI                                                                                  | 0.1023  | 0.0792 | 1.2919  | 0.1964 |
| UKB   | Diagnoses - main ICD10: G61 Inflammatory polyneuropathy                                        | -0.2041 | 0.1581 | -1.2911 | 0.1967 |
| UKB   | Diagnoses - main ICD10: L60 Nail disorders                                                     | 0.2254  | 0.1749 | 1.2885  | 0.1976 |
| UKB   | Diagnoses - main ICD10: C43 Malignant melanoma of skin                                         | -0.2768 | 0.2156 | -1.2841 | 0.1991 |
| UKB   | Cancer code, self-reported: squamous cell carcinoma                                            | -0.2782 | 0.2167 | -1.2838 | 0.1992 |
| UKB   | Treatment/medication code: humira 40mg injection solution 0.8ml prefilled syringe              | 0.1922  | 0.1499 | 1.2821  | 0.1998 |
| UKB   | Underlying (primary) cause of death: ICD10: X70.0 Home                                         | 0.3072  | 0.2397 | 1.2816  | 0.2    |
| UKB   | Snoring                                                                                        | -0.0501 | 0.0391 | -1.2792 | 0.2008 |
| LDHUB | Triglycerides in very large VLDL                                                               | -0.1068 | 0.0836 | -1.2769 | 0.2016 |
| UKB   | Doctor diagnosed lung cancer (not mesothelioma)                                                | -0.1934 | 0.1515 | -1.2762 | 0.2019 |
| UKB   | Diagnoses - main ICD10: T40 Poisoning by narcotics and psychodysleptics [hallucinogens]        | 0.4925  | 0.3863 | 1.2751  | 0.2023 |
| LDHUB | Chronotype                                                                                     | 0.0613  | 0.0481 | 1.275   | 0.2023 |
| LDHUB | Total lipids in chylomicrons and largest VLDL particles                                        | -0.115  | 0.0903 | -1.2741 | 0.2026 |
| UKB   | Diagnoses - main ICD10: J01 Acute sinusitis                                                    | 0.3594  | 0.2835 | 1.2679  | 0.2048 |
| UKB   | Diagnoses - main ICD10: D25 Leiomyoma of uterus                                                | 0.1149  | 0.0907 | 1.2675  | 0.205  |
| UKB   | Treatment/medication code: lumigan 0.3mg/ml eye drops                                          | 0.215   | 0.1698 | 1.2663  | 0.2054 |
| UKB   | Non-cancer illness code, self-reported: gastrointestinal bleeding                              | 0.3068  | 0.243  | 1.2625  | 0.2068 |
| UKB   | Diagnoses - main ICD10: I24 Other acute ischaemic heart diseases                               | 0.293   | 0.2323 | 1.261   | 0.2073 |
| UKB   | Non-cancer illness code, self-reported: measles / morbillivirus                                | -0.3034 | 0.2411 | -1.2586 | 0.2082 |
| UKB   | Non-cancer illness code, self-reported: peripheral nerve injury                                | 0.2819  | 0.2242 | 1.2577  | 0.2085 |
| UKB   | Non-cancer illness code, self-reported: disc problem                                           | 0.4728  | 0.3766 | 1.2552  | 0.2094 |
| UKB   | Diagnoses - main ICD10: N63 Unspecified lump in breast                                         | 0.2036  | 0.1627 | 1.2516  | 0.2107 |
| UKB   | Cancer code, self-reported: brain cancer / primary malignant brain tumour                      | 0.5386  | 0.4318 | 1.2472  | 0.2123 |
| UKB   | Treatment/medication code: kapake tablet                                                       | 0.2645  | 0.2122 | 1.2469  | 0.2124 |
| UKB   | Why stopped smoking: Financial reasons                                                         | -0.172  | 0.1385 | -1.2417 | 0.2143 |
| UKB   | Treatment/medication code: nortriptyline                                                       | 0.2658  | 0.2142 | 1.2409  | 0.2146 |
| UKB   | Non-cancer illness code, self-reported: unclassifiable                                         | 0.3674  | 0.2963 | 1.24    | 0.215  |
| UKB   | Difficulty not smoking for 1 day                                                               | 0.1231  | 0.0994 | 1.2381  | 0.2157 |
| UKB   | Diagnoses - main ICD10: I50 Heart failure                                                      | 0.1507  | 0.1223 | 1.2324  | 0.2178 |
| UKB   | Treatment/medication code: minims artificial tears single-use eye drops                        | 0.3956  | 0.3214 | 1.2307  | 0.2184 |
| UKB   | Why reduced smoking: Health precaution                                                         | -0.2195 | 0.1784 | -1.2298 | 0.2188 |
| UKB   | Cancer diagnosed by doctor                                                                     | 0.1109  | 0.0909 | 1.2202  | 0.2224 |
| UKB   | Treatment/medication code: atrovent 20micrograms inhaler                                       | 0.1991  | 0.1633 | 1.219   | 0.2228 |
| UKB   | Non-cancer illness code, self-reported: hayfever/allergic rhinitis                             | -0.0667 | 0.0548 | -1.2183 | 0.2231 |
| UKB   | Diagnoses - main ICD10: S13 Dislocation, sprain and strain of joints and ligaments at neck lev | 0.3269  | 0.2689 | 1.2157  | 0.2241 |
| UKB   | Non-cancer illness code, self-reported: dupuytren's contracture                                | 0.2437  | 0.2006 | 1.2152  | 0.2243 |
| UKB   | Treatment/medication code: bendrofluzide                                                       | 0.1278  | 0.1052 | 1.2151  | 0.2243 |
| UKB   | Hip pain for 3+ months                                                                         | 0.4609  | 0.3796 | 1.2142  | 0.2247 |
| UKB   | Diagnoses - main ICD10: M65 Synovitis and tenosynovitis                                        | 0.2021  | 0.1665 | 1.2136  | 0.2249 |
| LDHUB | Anorexia Nervosa                                                                               | 0.0686  | 0.0566 | 1.2122  | 0.2254 |
| UKB   | Age when periods started (menarche)                                                            | -0.0356 | 0.0295 | -1.2084 | 0.2269 |
| UKB   | Non-cancer illness code, self-reported: polycystic ovaries/polycystic ovarian syndrome         | 0.1709  | 0.1414 | 1.208   | 0.227  |
| UKB   | Treatment/medication code: zimovane ls 3.75mg tablet                                           | 0.2208  | 0.1831 | 1.2056  | 0.228  |
| UKB   | Diagnoses - main ICD10: Z01 Other special examinations and investigations of persons withou    | 0.2329  | 0.1932 | 1.2057  | 0.228  |
| LDHUB | Cholesterol esters in large VLDL                                                               | -0.0883 | 0.0732 | -1.2051 | 0.2282 |
| UKB   | Chest pain due to walking ceases when standing still                                           | -0.4592 | 0.3814 | -1.2038 | 0.2287 |
| UKB   | Type of tobacco previously smoked: Cigars or pipes                                             | -0.1942 | 0.1614 | -1.2035 | 0.2288 |
| UKB   | Diagnoses - main ICD10: S69 Other and unspecified injuries of wrist and hand                   | 0.2252  | 0.1873 | 1.2025  | 0.2292 |
| UKB   | Non-cancer illness code, self-reported: epilepsy                                               | 0.1463  | 0.1219 | 1.1999  | 0.2302 |
| UKB   | Diagnoses - main ICD10: T17 Foreign body in respiratory tract                                  | 0.3587  | 0.299  | 1.1996  | 0.2303 |
| UKB   | Treatment/medication code: amiodarone                                                          | 0.1589  | 0.1329 | 1.196   | 0.2317 |
| UKB   | Treatment/medication code: felodipine                                                          | 0.148   | 0.1239 | 1.194   | 0.2325 |
| UKB   | Diagnoses - main ICD10: J45 Asthma                                                             | 0.4536  | 0.3805 | 1.1922  | 0.2332 |
| UKB   | Treatment/medication code: diprosalic ointment                                                 | -0.1329 | 0.1116 | -1.1908 | 0.2337 |
| UKB   | Diagnoses - main ICD10: N75 Diseases of Bartholin's gland                                      | 0.2238  | 0.188  | 1.1901  | 0.234  |
| UKB   | Non-cancer illness code, self-reported: fracture upper arm / humerus / elbow                   | -0.181  | 0.1522 | -1.1889 | 0.2345 |
| UKB   | Diagnoses - main ICD10: H72 Perforation of tympanic membrane                                   | 0.3306  | 0.2784 | 1.1873  | 0.2351 |
| LDHUB | Child birth weight                                                                             | -0.0896 | 0.0756 | -1.1858 | 0.2357 |
| LDHUB | HOMA-IR                                                                                        | 0.1123  | 0.0948 | 1.1853  | 0.2359 |
| UKB   | Non-cancer illness code, self-reported: bronchiectasis                                         | 0.2471  | 0.2085 | 1.1847  | 0.2361 |

|       |                                                                                                                  |         |        |         |        |
|-------|------------------------------------------------------------------------------------------------------------------|---------|--------|---------|--------|
| UKB   | Diagnoses - main ICD10: S22 Fracture of rib(s), sternum and thoracic spine                                       | 0.2054  | 0.1734 | 1.1848  | 0.2361 |
| UKB   | Which eye(s) affected by hypermetropia (long sight): Right eye                                                   | 0.2066  | 0.1744 | 1.1843  | 0.2363 |
| UKB   | Treatment/medication code: clobetasol                                                                            | 0.2928  | 0.2473 | 1.184   | 0.2364 |
| UKB   | Diagnoses - main ICD10: K43 Ventral hernia                                                                       | 0.126   | 0.107  | 1.1782  | 0.2387 |
| LDHUB | Free cholesterol in large VLDL                                                                                   | -0.0937 | 0.0797 | -1.1753 | 0.2399 |
| UKB   | Non-cancer illness code, self-reported: raynaud's phenomenon/disease                                             | -0.2145 | 0.1829 | -1.1727 | 0.2409 |
| UKB   | Non-cancer illness code, self-reported: fracture skull / head                                                    | 0.1512  | 0.1292 | 1.1698  | 0.2421 |
| UKB   | Diagnoses - main ICD10: H25 Senile cataract                                                                      | 0.1638  | 0.14   | 1.1695  | 0.2422 |
| UKB   | Treatment/medication code: docusate sodium                                                                       | 0.5511  | 0.4715 | 1.1686  | 0.2426 |
| LDHUB | Multiple sclerosis                                                                                               | 0.1846  | 0.158  | 1.1679  | 0.2429 |
| UKB   | Diagnoses - main ICD10: O36 Maternal care for other known or suspected foetal problems                           | 0.19    | 0.1629 | 1.1667  | 0.2433 |
| UKB   | Non-cancer illness code, self-reported: appendicitis                                                             | 0.2955  | 0.2551 | 1.1585  | 0.2466 |
| UKB   | Maximum heart rate during fitness test                                                                           | -0.0931 | 0.0805 | -1.1565 | 0.2475 |
| UKB   | Treatment/medication code: logynon tablet                                                                        | -0.1803 | 0.1561 | -1.1551 | 0.2481 |
| UKB   | Non-cancer illness code, self-reported: scleroderma/systemic sclerosis                                           | -0.2409 | 0.2086 | -1.1545 | 0.2483 |
| UKB   | Treatment/medication code: protelos 2g sachets                                                                   | 0.1805  | 0.1565 | 1.1534  | 0.2488 |
| UKB   | Non-cancer illness code, self-reported: peptic ulcer                                                             | 0.37    | 0.321  | 1.1526  | 0.2491 |
| UKB   | Treatment/medication code: singulair 10mg tablet                                                                 | 0.6466  | 0.5618 | 1.1509  | 0.2498 |
| UKB   | Diagnoses - main ICD10: E10 Insulin-dependent diabetes mellitus                                                  | -0.1979 | 0.1724 | -1.1477 | 0.2511 |
| UKB   | Years since last breast cancer screening / mammogram                                                             | -0.1739 | 0.1518 | -1.1454 | 0.252  |
| UKB   | Treatment/medication code: creon e/c granules in capsule                                                         | 0.3681  | 0.3217 | 1.1443  | 0.2525 |
| UKB   | Heel bone mineral density (BMD) T-score, automated (right)                                                       | -0.039  | 0.0342 | -1.1427 | 0.2532 |
| UKB   | Treatment/medication code: gaviscon liquid                                                                       | 0.2367  | 0.2074 | 1.1411  | 0.2538 |
| LDHUB | Albumin                                                                                                          | 0.1695  | 0.1486 | 1.1404  | 0.2541 |
| UKB   | Non-cancer illness code, self-reported: vertigo                                                                  | 0.324   | 0.2843 | 1.1397  | 0.2544 |
| UKB   | Diagnoses - main ICD10: H02 Other disorders of eyelid                                                            | 0.3409  | 0.2994 | 1.1385  | 0.2549 |
| LDHUB | Difference in height between childhood and adulthood; age 8                                                      | 0.091   | 0.08   | 1.1377  | 0.2552 |
| UKB   | Underlying (primary) cause of death: ICD10: C15.9 Oesophagus, unspecified                                        | 0.1867  | 0.1643 | 1.1366  | 0.2557 |
| UKB   | Surgery on leg arteries (other than for varicose veins)                                                          | 0.432   | 0.3801 | 1.1364  | 0.2558 |
| UKB   | Diagnoses - main ICD10: O64 Obstructed labour due to malposition and malpresentation of foetus                   | -0.2309 | 0.2033 | -1.1359 | 0.256  |
| UKB   | Treatment/medication code: leflunomide                                                                           | 0.3699  | 0.3268 | 1.132   | 0.2576 |
| UKB   | Treatment/medication code: salmeterol product                                                                    | 0.1757  | 0.1555 | 1.1299  | 0.2585 |
| UKB   | Diagnoses - main ICD10: A87 Viral meningitis                                                                     | 0.1909  | 0.1693 | 1.1275  | 0.2595 |
| UKB   | Diagnoses - main ICD10: J38 Diseases of vocal cords and larynx, not elsewhere classified                         | 0.3299  | 0.2934 | 1.1246  | 0.2608 |
| UKB   | Treatment/medication code: co-proxamol                                                                           | 0.3094  | 0.2759 | 1.1216  | 0.262  |
| UKB   | Treatment/medication code: naproxen                                                                              | 0.1504  | 0.1341 | 1.1214  | 0.2621 |
| LDHUB | Concentration of chylomicrons and largest VLDL particles                                                         | -0.1104 | 0.0985 | -1.1207 | 0.2624 |
| UKB   | Non-cancer illness code, self-reported: interstitial lung disease                                                | -0.1575 | 0.1405 | -1.1205 | 0.2625 |
| UKB   | Which eye(s) affected by myopia (short sight): Right eye                                                         | 0.1218  | 0.1089 | 1.1187  | 0.2633 |
| UKB   | Diagnoses - main ICD10: N12 Tubulo-interstitial nephritis, not specified as acute or chronic                     | 0.3875  | 0.3464 | 1.1187  | 0.2633 |
| UKB   | Diagnoses - main ICD10: O60 Preterm delivery                                                                     | 0.2247  | 0.201  | 1.1181  | 0.2635 |
| UKB   | Diagnoses - main ICD10: I65 Occlusion and stenosis of precerebral arteries, not resulting in cerebral infarction | 0.1769  | 0.1582 | 1.118   | 0.2636 |
| UKB   | Diagnoses - main ICD10: D23 Other benign neoplasms of skin                                                       | 0.207   | 0.1853 | 1.1171  | 0.264  |
| UKB   | Diagnoses - main ICD10: D21 Other benign neoplasms of connective and other soft tissue                           | 0.1801  | 0.1614 | 1.1158  | 0.2645 |
| UKB   | Treatment/medication code: spasmonal 60mg capsule                                                                | 0.347   | 0.3118 | 1.1129  | 0.2657 |
| UKB   | Non-cancer illness code, self-reported: chickenpox                                                               | -0.3602 | 0.3238 | -1.1124 | 0.266  |
| UKB   | Treatment/medication code: mercilon tablet                                                                       | 0.1808  | 0.1631 | 1.1082  | 0.2678 |
| UKB   | Diagnoses - main ICD10: Z51 Other medical care                                                                   | -0.2049 | 0.1851 | -1.107  | 0.2683 |
| UKB   | Treatment/medication code: vitamin b6 preparation                                                                | -0.1778 | 0.1609 | -1.1054 | 0.269  |
| LDHUB | Autism spectrum disorder                                                                                         | -0.0949 | 0.086  | -1.1041 | 0.2695 |
| UKB   | Diagnoses - main ICD10: L03 Cellulitis                                                                           | 0.1942  | 0.1759 | 1.1041  | 0.2696 |
| UKB   | Underlying (primary) cause of death: ICD10: I42.0 Dilated cardiomyopathy                                         | -0.2559 | 0.2319 | -1.1034 | 0.2699 |
| UKB   | Non-cancer illness code, self-reported: hyperthyroidism/thyrototoxicosis                                         | -0.1087 | 0.0988 | -1.1    | 0.2713 |
| UKB   | Treatment/medication code: indivina 1mg/2.5mg tablet                                                             | 0.2412  | 0.2193 | 1.0998  | 0.2714 |
| UKB   | Number of older siblings                                                                                         | 0.45    | 0.4108 | 1.0955  | 0.2733 |
| UKB   | Treatment/medication code: simvador 10mg tablet                                                                  | 0.2818  | 0.2574 | 1.095   | 0.2735 |
| UKB   | Diagnoses - main ICD10: L91 Hypertrophic disorders of skin                                                       | 0.2287  | 0.2089 | 1.0949  | 0.2735 |
| UKB   | Non-cancer illness code, self-reported: oesophageal disorder                                                     | -0.1536 | 0.1403 | -1.0947 | 0.2737 |
| UKB   | Treatment/medication code: climaval 1mg tablet                                                                   | 0.1915  | 0.1754 | 1.0915  | 0.2751 |
| UKB   | Treatment/medication code: solpadol caplet                                                                       | 0.443   | 0.4063 | 1.0904  | 0.2756 |
| UKB   | Treatment/medication code: dothiepin                                                                             | 0.3639  | 0.3342 | 1.0886  | 0.2763 |
| LDHUB | ICV                                                                                                              | -0.0991 | 0.0911 | -1.088  | 0.2766 |
| UKB   | Non-cancer illness code, self-reported: allergy or anaphylactic reaction to food                                 | 0.6709  | 0.6167 | 1.0878  | 0.2767 |

|       |                                                                                                 |         |        |         |        |
|-------|-------------------------------------------------------------------------------------------------|---------|--------|---------|--------|
| UKB   | Treatment/medication code: e45 cream                                                            | 0.6593  | 0.6066 | 1.0868  | 0.2771 |
| UKB   | Treatment/medication code: mirapexin 0.088mg tablet                                             | 0.2617  | 0.2412 | 1.0852  | 0.2778 |
| UKB   | Treatment/medication code: irbesartan                                                           | 0.1367  | 0.1263 | 1.0824  | 0.2791 |
| UKB   | Treatment/medication code: ginkgo forte tablet                                                  | -0.1582 | 0.1463 | -1.0811 | 0.2797 |
| UKB   | Diagnoses - main ICD10: J47 Bronchiectasis                                                      | -0.2313 | 0.2141 | -1.0808 | 0.2798 |
| UKB   | Treatment/medication code: etodolac                                                             | 0.2796  | 0.2587 | 1.0806  | 0.2799 |
| LDHUB | Total lipids in very large VLDL                                                                 | -0.0908 | 0.0841 | -1.0806 | 0.2799 |
| UKB   | Treatment/medication code: losartan                                                             | 0.0858  | 0.0795 | 1.0794  | 0.2804 |
| UKB   | Leg pain when walking normally                                                                  | 0.2354  | 0.2181 | 1.0792  | 0.2805 |
| UKB   | Treatment/medication code: carbimazole                                                          | -0.3738 | 0.3468 | -1.0779 | 0.2811 |
| LDHUB | Forced expiratory volume in 1 second (FEV1)                                                     | -0.0875 | 0.0815 | -1.0745 | 0.2826 |
| UKB   | Treatment/medication code: cabergoline                                                          | 0.5896  | 0.5495 | 1.073   | 0.2833 |
| UKB   | Treatment/medication code: viazem xl 120mg m/r capsule                                          | 0.2036  | 0.19   | 1.0716  | 0.2839 |
| LDHUB | Height_2010                                                                                     | -0.0394 | 0.0368 | -1.07   | 0.2846 |
| UKB   | Non-cancer illness code, self-reported: psoriasis                                               | 0.0934  | 0.0874 | 1.0692  | 0.285  |
| UKB   | Treatment/medication code: mycophenolate                                                        | 0.2191  | 0.2053 | 1.0671  | 0.2859 |
| UKB   | Underlying (primary) cause of death: ICD10: J44.9 Chronic obstructive pulmonary disease, un     | 0.4129  | 0.3876 | 1.0652  | 0.2868 |
| UKB   | Diagnoses - main ICD10: Z09 Follow-up examination after treatment for conditions other than     | 0.1508  | 0.1416 | 1.0649  | 0.2869 |
| UKB   | Diagnoses - main ICD10: I95 Hypotension                                                         | 0.4729  | 0.4449 | 1.0628  | 0.2879 |
| UKB   | Diagnoses - main ICD10: E11 Non-insulin-dependent diabetes mellitus                             | 0.15    | 0.1412 | 1.0622  | 0.2881 |
| UKB   | Treatment/medication code: duloxetine                                                           | 0.318   | 0.2998 | 1.0608  | 0.2888 |
| UKB   | Home area population density - urban or rural: Scotland - Remote Rural                          | 0.1265  | 0.1194 | 1.0598  | 0.2892 |
| UKB   | Treatment/medication code: enalapril maleate+hydrochlorothiazide 20mg/12.5mg tablet             | 0.2477  | 0.2339 | 1.0588  | 0.2897 |
| UKB   | Longest period of depression                                                                    | 0.1029  | 0.0973 | 1.0571  | 0.2905 |
| UKB   | Trunk predicted mass                                                                            | 0.03    | 0.0284 | 1.0567  | 0.2906 |
| UKB   | Treatment/medication code: salazopyrin 500mg tablet                                             | 0.1512  | 0.1431 | 1.0565  | 0.2908 |
| LDHUB | Forearm Bone mineral density                                                                    | 0.1708  | 0.1621 | 1.0534  | 0.2922 |
| UKB   | Trunk fat-free mass                                                                             | 0.0299  | 0.0284 | 1.0525  | 0.2926 |
| UKB   | Doctor diagnosed sarcoidosis                                                                    | 0.1712  | 0.1628 | 1.0515  | 0.2931 |
| UKB   | Diagnoses - main ICD10: N49 Inflammatory disorders of male genital organs, not elsewhere class  | 0.2843  | 0.2709 | 1.0496  | 0.2939 |
| UKB   | Longest period of unenthusiasm / disinterest                                                    | -0.1465 | 0.1398 | -1.0484 | 0.2945 |
| UKB   | Non-cancer illness code, self-reported: crohns disease                                          | 0.1051  | 0.1004 | 1.0472  | 0.295  |
| UKB   | Non-cancer illness code, self-reported: duodenal ulcer                                          | 0.4469  | 0.4268 | 1.047   | 0.2951 |
| UKB   | Treatment/medication code: hydroxocobalamin                                                     | -0.1939 | 0.1855 | -1.045  | 0.296  |
| UKB   | Illnesses of mother: Breast cancer                                                              | 0.0819  | 0.0784 | 1.0441  | 0.2964 |
| UKB   | Treatment/medication code: multivitamins                                                        | 0.8038  | 0.7707 | 1.043   | 0.297  |
| UKB   | Non-cancer illness code, self-reported: other joint disorder                                    | 0.5655  | 0.5426 | 1.0422  | 0.2973 |
| UKB   | Heel bone mineral density (BMD) T-score, automated                                              | -0.0375 | 0.036  | -1.0404 | 0.2982 |
| UKB   | Illnesses of father: Parkinson's disease                                                        | -0.196  | 0.1884 | -1.0399 | 0.2984 |
| UKB   | Treatment/medication code: lisinopril                                                           | 0.0715  | 0.0688 | 1.0385  | 0.2991 |
| UKB   | Non-cancer illness code, self-reported: fracture vertebra / crush fracture / vertebral collapse | 0.3705  | 0.3572 | 1.0372  | 0.2996 |
| UKB   | Treatment/medication code: flucloxacillin                                                       | 0.2696  | 0.2599 | 1.0373  | 0.2996 |
| UKB   | Duration of other exercises                                                                     | 0.0827  | 0.0803 | 1.0296  | 0.3032 |
| UKB   | Treatment/medication code: zestoretic 10 tablet                                                 | 0.2302  | 0.2237 | 1.0292  | 0.3034 |
| UKB   | Treatment/medication code: isosorbide dinitrate                                                 | 0.1415  | 0.1377 | 1.028   | 0.3039 |
| UKB   | Diagnoses - main ICD10: D48 Neoplasm of uncertain or unknown behaviour of other and unspecified | 0.298   | 0.29   | 1.0276  | 0.3041 |
| UKB   | Treatment/medication code: vitamin a                                                            | -0.1918 | 0.1868 | -1.0272 | 0.3043 |
| UKB   | Diagnoses - main ICD10: I21 Acute myocardial infarction                                         | 0.0883  | 0.086  | 1.0273  | 0.3043 |
| UKB   | Illnesses of father: None of the above (group 1)                                                | -0.0772 | 0.0752 | -1.026  | 0.3049 |
| UKB   | Had menopause                                                                                   | -0.0836 | 0.0817 | -1.023  | 0.3063 |
| UKB   | Non-cancer illness code, self-reported: menorrhagia (unknown cause)                             | 0.1359  | 0.1328 | 1.0228  | 0.3064 |
| UKB   | Treatment/medication code: nitrolingual 400micrograms spray                                     | 0.1504  | 0.1474 | 1.0206  | 0.3074 |
| UKB   | Wears glasses or contact lenses                                                                 | -0.0629 | 0.0616 | -1.0203 | 0.3076 |
| UKB   | Treatment/medication code: pregabalin                                                           | 0.456   | 0.447  | 1.02    | 0.3077 |
| UKB   | Treatment/medication code: glyceryl trinitrate                                                  | 0.4319  | 0.4243 | 1.0179  | 0.3087 |
| LDHUB | Ferritin                                                                                        | -0.1095 | 0.1076 | -1.017  | 0.3092 |
| UKB   | Non-cancer illness code, self-reported: haemorrhoids / piles                                    | -0.1678 | 0.1652 | -1.0161 | 0.3096 |
| UKB   | Diagnoses - main ICD10: S83 Dislocation, sprain and strain of joints and ligaments of knee      | 0.2334  | 0.2297 | 1.0159  | 0.3097 |
| UKB   | Treatment/medication code: angitil sr 90 m/r capsule                                            | 0.1549  | 0.1525 | 1.0157  | 0.3098 |
| UKB   | Comparative height size at age 10                                                               | -0.0302 | 0.0298 | -1.0124 | 0.3113 |
| UKB   | Tinnitus severity/nuisance                                                                      | 0.14    | 0.1387 | 1.0094  | 0.3128 |
| UKB   | Non-cancer illness code, self-reported: pericarditis                                            | 0.2117  | 0.2098 | 1.0093  | 0.3128 |
| UKB   | Diagnoses - main ICD10: K85 Acute pancreatitis                                                  | 0.13    | 0.129  | 1.0083  | 0.3133 |



|       |                                                                                              |         |        |         |        |
|-------|----------------------------------------------------------------------------------------------|---------|--------|---------|--------|
| UKB   | Diagnoses - main ICD10: D50 Iron deficiency anaemia                                          | 0.1304  | 0.1295 | 1.0075  | 0.3137 |
| UKB   | Underlying (primary) cause of death: ICD10: K70.3 Alcoholic cirrhosis of liver               | 0.285   | 0.2829 | 1.0073  | 0.3138 |
| UKB   | Manic/hyper symptoms: I was more creative or had more ideas than usual                       | 0.2459  | 0.2442 | 1.0071  | 0.3139 |
| UKB   | Diagnoses - main ICD10: N86 Erosion and ectropion of cervix uteri                            | 0.207   | 0.2055 | 1.0071  | 0.3139 |
| UKB   | Diagnoses - main ICD10: H26 Other cataract                                                   | 0.0783  | 0.0778 | 1.0066  | 0.3141 |
| UKB   | Diagnoses - main ICD10: J36 Peritonsillar abscess                                            | 0.4981  | 0.4958 | 1.0047  | 0.3151 |
| UKB   | Diagnoses - main ICD10: R42 Dizziness and giddiness                                          | 0.7031  | 0.7004 | 1.0038  | 0.3155 |
| UKB   | Diagnoses - main ICD10: K05 Gingivitis and periodontal diseases                              | 0.1828  | 0.1822 | 1.0029  | 0.3159 |
| UKB   | Diagnoses - main ICD10: D12 Benign neoplasm of colon, rectum, anus and anal canal            | 0.0833  | 0.0835 | 0.9975  | 0.3185 |
| UKB   | Diagnoses - main ICD10: S46 Injury of muscle and tendon at shoulder and upper arm level      | 0.24    | 0.241  | 0.9957  | 0.3194 |
| LDHUB | Forced expiratory volume in 1 second (FEV1)/Forced Vital capacity(FVC)                       | -0.0678 | 0.0683 | -0.9924 | 0.321  |
| UKB   | Underlying (primary) cause of death: ICD10: A81.0 Creutzfeldt-Jakob disease                  | 0.183   | 0.1852 | 0.9883  | 0.323  |
| UKB   | Cancer code, self-reported: rectal cancer                                                    | -0.1319 | 0.1335 | -0.9877 | 0.3233 |
| LDHUB | Total cholesterol in large VLDL                                                              | -0.0836 | 0.0846 | -0.9876 | 0.3234 |
| UKB   | Treatment/medication code: volsaid retard 75mg m/r tablet                                    | 0.1804  | 0.1829 | 0.9862  | 0.324  |
| UKB   | Medication for cholesterol, blood pressure or diabetes: Insulin                              | 0.1095  | 0.1111 | 0.9863  | 0.324  |
| UKB   | Distance between home and job workplace                                                      | 0.1004  | 0.1019 | 0.9851  | 0.3246 |
| UKB   | Cancer code, self-reported: rodent ulcer                                                     | 0.1621  | 0.1648 | 0.9834  | 0.3254 |
| UKB   | Diagnoses - main ICD10: Z42 Follow-up care involving plastic surgery                         | 0.2791  | 0.2838 | 0.9833  | 0.3255 |
| LDHUB | Acetoacetate                                                                                 | -0.0866 | 0.0882 | -0.9821 | 0.3261 |
| UKB   | Mean time to correctly identify matches                                                      | 0.0403  | 0.0412 | 0.9803  | 0.3269 |
| UKB   | Treatment/medication code: prozac 20mg capsule                                               | 0.4396  | 0.451  | 0.9747  | 0.3297 |
| UKB   | Treatment/medication code: zydol 50mg capsule                                                | 0.2357  | 0.2422 | 0.9732  | 0.3305 |
| UKB   | Reproducibility of spirometry measurement using ERS/ATS criteria                             | -0.0821 | 0.0844 | -0.9729 | 0.3306 |
| UKB   | Diagnoses - main ICD10: I22 Subsequent myocardial infarction                                 | 0.2951  | 0.3033 | 0.9728  | 0.3307 |
| UKB   | Ever had cervical smear test                                                                 | -0.1808 | 0.1862 | -0.9711 | 0.3315 |
| UKB   | Treatment/medication code: piriton 4mg tablet                                                | 0.2255  | 0.2327 | 0.9689  | 0.3326 |
| UKB   | Treatment/medication code: cozaar 25mg tablet                                                | -0.1657 | 0.171  | -0.9685 | 0.3328 |
| UKB   | Non-cancer illness code, self-reported: iritis                                               | 0.1551  | 0.1606 | 0.9657  | 0.3342 |
| UKB   | Duration of strenuous sports                                                                 | 0.1322  | 0.137  | 0.9645  | 0.3348 |
| UKB   | Manic/hyper symptoms: All of the above                                                       | 0.2199  | 0.2281 | 0.9641  | 0.335  |
| UKB   | Treatment/medication code: vitamin b12 preparation                                           | 0.1266  | 0.1315 | 0.9632  | 0.3354 |
| UKB   | Treatment/medication code: anusol cream                                                      | 0.2343  | 0.2434 | 0.9625  | 0.3358 |
| UKB   | Average monthly fortified wine intake                                                        | -0.1789 | 0.1866 | -0.9587 | 0.3377 |
| UKB   | Treatment/medication code: rosuvastatin                                                      | 0.1638  | 0.1709 | 0.9584  | 0.3379 |
| LDHUB | Description of average fatty acid chain length; not actual carbon number                     | -0.1051 | 0.11   | -0.9563 | 0.3389 |
| UKB   | Treatment/medication code: fentanyl                                                          | -0.1435 | 0.1501 | -0.9561 | 0.339  |
| LDHUB | Parkinsons disease                                                                           | -0.0697 | 0.0729 | -0.9558 | 0.3392 |
| UKB   | Doctor diagnosed tuberculosis                                                                | 0.2141  | 0.2243 | 0.9545  | 0.3398 |
| UKB   | Treatment/medication code: fludrocortisone                                                   | -0.3514 | 0.3691 | -0.9521 | 0.341  |
| UKB   | Treatment/medication code: timolol 0.25% eye drops                                           | 0.3666  | 0.385  | 0.9521  | 0.3411 |
| UKB   | Diagnoses - main ICD10: R40 Somnolence, stupor and coma                                      | 0.2503  | 0.2635 | 0.95    | 0.3421 |
| UKB   | Treatment/medication code: solaraze 3% gel                                                   | 0.4964  | 0.5235 | 0.9482  | 0.343  |
| UKB   | Non-cancer illness code, self-reported: systemic lupus erythematosus/sle                     | -0.2041 | 0.2154 | -0.9475 | 0.3434 |
| UKB   | Diagnoses - main ICD10: F33 Recurrent depressive disorder                                    | 0.3235  | 0.3421 | 0.9455  | 0.3444 |
| UKB   | Diagnoses - main ICD10: M95 Other acquired deformities of musculoskeletal system and con     | 0.1239  | 0.1311 | 0.945   | 0.3447 |
| UKB   | Treatment/medication code: clomipramine                                                      | -0.1939 | 0.2056 | -0.943  | 0.3457 |
| UKB   | Medication for cholesterol, blood pressure, diabetes, or take exogenous hormones: Oral cont  | -0.1356 | 0.1438 | -0.9426 | 0.3459 |
| UKB   | Doctor diagnosed emphysema                                                                   | 0.2394  | 0.2551 | 0.9383  | 0.3481 |
| UKB   | Treatment/medication code: tildiem 60mg m/r tablet                                           | 0.1452  | 0.155  | 0.9369  | 0.3488 |
| UKB   | Diagnoses - main ICD10: N30 Cystitis                                                         | 0.3744  | 0.4003 | 0.9353  | 0.3497 |
| UKB   | Diagnoses - main ICD10: S92 Fracture of foot, except ankle                                   | 0.2291  | 0.2451 | 0.935   | 0.3498 |
| UKB   | Diagnoses - main ICD10: D28 Benign neoplasm of other and unspecified female genital organ    | 0.2496  | 0.2672 | 0.9342  | 0.3502 |
| UKB   | Diagnoses - main ICD10: O03 Spontaneous abortion                                             | 0.2175  | 0.233  | 0.9336  | 0.3505 |
| LDHUB | Serumurate overweight                                                                        | -0.0605 | 0.0651 | -0.9301 | 0.3523 |
| UKB   | Diagnoses - main ICD10: F60 Specific personality disorders                                   | 0.1151  | 0.1238 | 0.9296  | 0.3526 |
| UKB   | Diagnoses - main ICD10: S52 Fracture of forearm                                              | -0.087  | 0.0936 | -0.9295 | 0.3526 |
| UKB   | Underlying (primary) cause of death: ICD10: C66 Malignant neoplasm of ureter                 | -0.1513 | 0.1632 | -0.927  | 0.3539 |
| UKB   | Diagnoses - main ICD10: T83 Complications of genito-urinary prosthetic devices, implants anc | 0.1593  | 0.1719 | 0.9268  | 0.354  |
| UKB   | Diagnoses - main ICD10: I73 Other peripheral vascular diseases                               | -0.4102 | 0.4435 | -0.9249 | 0.355  |
| UKB   | Treatment/medication code: celecoxib                                                         | 0.3962  | 0.4299 | 0.9216  | 0.3567 |
| UKB   | Treatment/medication code: sotalol                                                           | 0.2094  | 0.2274 | 0.9209  | 0.3571 |
| UKB   | Non-cancer illness code, self-reported: parkinsons disease                                   | 0.2105  | 0.2289 | 0.9198  | 0.3577 |

|       |                                                                                                       |         |        |         |        |
|-------|-------------------------------------------------------------------------------------------------------|---------|--------|---------|--------|
| UKB   | Underlying (primary) cause of death: ICD10: K63.1 Perforation of intestine (nontraumatic)             | 0.1839  | 0.1999 | 0.9198  | 0.3577 |
| LDHUB | Femoral neck bone mineral density                                                                     | -0.0425 | 0.0464 | -0.9164 | 0.3594 |
| UKB   | Diagnoses - main ICD10: Z35 Supervision of high-risk pregnancy                                        | 0.1462  | 0.1595 | 0.9163  | 0.3595 |
| UKB   | Non-cancer illness code, self-reported: polycystic kidney                                             | 0.2719  | 0.2984 | 0.9111  | 0.3623 |
| UKB   | Treatment/medication code: tramacet 325mg/37.5mg tablet                                               | 0.5471  | 0.6009 | 0.9105  | 0.3626 |
| UKB   | Treatment/medication code: femoston 1/10 tablet                                                       | 0.1645  | 0.1808 | 0.9097  | 0.363  |
| UKB   | Average monthly intake of other alcoholic drinks                                                      | -0.1273 | 0.1402 | -0.9081 | 0.3638 |
| UKB   | Non-cancer illness code, self-reported: sarcoidosis                                                   | 0.1067  | 0.1174 | 0.9082  | 0.3638 |
| LDHUB | Phospholipids in chylomicrons and largest VLDL particles                                              | -0.0796 | 0.088  | -0.9054 | 0.3652 |
| UKB   | Diagnoses - main ICD10: H04 Disorders of lachrymal system                                             | 0.5037  | 0.5586 | 0.9017  | 0.3672 |
| UKB   | Non-cancer illness code, self-reported: miscarriage                                                   | 0.4256  | 0.4747 | 0.8966  | 0.3699 |
| LDHUB | Mean Thalamus                                                                                         | 0.0907  | 0.1014 | 0.8938  | 0.3714 |
| UKB   | Non-cancer illness code, self-reported: osteopenia                                                    | -0.2947 | 0.3299 | -0.8934 | 0.3717 |
| UKB   | Non-cancer illness code, self-reported: muscle/soft tissue problem                                    | 0.1289  | 0.1445 | 0.8925  | 0.3721 |
| UKB   | Treatment/medication code: nicorandil                                                                 | 0.1143  | 0.1291 | 0.886   | 0.3756 |
| UKB   | Mineral and other dietary supplements: Zinc                                                           | 0.066   | 0.0747 | 0.8842  | 0.3766 |
| UKB   | Non-cancer illness code, self-reported: head injury                                                   | 0.1382  | 0.1563 | 0.8837  | 0.3768 |
| UKB   | Diagnoses - main ICD10: G40 Epilepsy                                                                  | 0.5406  | 0.6123 | 0.8828  | 0.3773 |
| UKB   | Types of transport used (excluding work): Public transport                                            | -0.0486 | 0.0551 | -0.8822 | 0.3777 |
| LDHUB | Platelet count                                                                                        | 0.0473  | 0.0537 | 0.8821  | 0.3777 |
| UKB   | Illnesses of mother: Stroke                                                                           | -0.082  | 0.093  | -0.882  | 0.3778 |
| UKB   | Treatment/medication code: prochlorperazine                                                           | 0.2369  | 0.269  | 0.8805  | 0.3786 |
| UKB   | Treatment/medication code: piroxicam                                                                  | 0.2076  | 0.2358 | 0.8805  | 0.3786 |
| UKB   | Treatment/medication code: amitriptyline hydrochloride+perphenazine 10mg/2mg tablet                   | 0.161   | 0.183  | 0.8796  | 0.3791 |
| UKB   | Average monthly spirits intake                                                                        | 0.1175  | 0.1337 | 0.8788  | 0.3795 |
| LDHUB | Adiponectin                                                                                           | -0.0669 | 0.0761 | -0.8787 | 0.3796 |
| UKB   | Cancer code, self-reported: small intestine/small bowel cancer                                        | 0.2299  | 0.262  | 0.8774  | 0.3803 |
| LDHUB | Extreme height                                                                                        | -0.0396 | 0.0452 | -0.8771 | 0.3804 |
| UKB   | Diagnoses - main ICD10: N43 Hydrocele and spermatocele                                                | 0.1011  | 0.1154 | 0.8759  | 0.3811 |
| UKB   | Treatment/medication code: eprosartan                                                                 | 0.2293  | 0.262  | 0.8754  | 0.3814 |
| UKB   | Treatment/medication code: tetralysal 300 capsule                                                     | 0.1602  | 0.1833 | 0.8739  | 0.3822 |
| UKB   | Fractured bone site(s): Leg                                                                           | 0.1123  | 0.1286 | 0.8727  | 0.3828 |
| UKB   | Underlying (primary) cause of death: ICD10: N39.0 Urinary tract infection, site not specified         | -0.1997 | 0.2289 | -0.8724 | 0.383  |
| UKB   | Non-cancer illness code, self-reported: infectious mononucleosis / glandular fever / Epstein B        | -0.4136 | 0.4754 | -0.87   | 0.3843 |
| UKB   | Doctor diagnosed idiopathic pulmonary fibrosis                                                        | 0.3287  | 0.3779 | 0.8699  | 0.3844 |
| UKB   | Treatment/medication code: olmesartan                                                                 | 0.2224  | 0.2566 | 0.8664  | 0.3863 |
| LDHUB | Urinary albumin-to-creatinine ratio                                                                   | 0.0797  | 0.0921 | 0.865   | 0.3871 |
| UKB   | Diagnoses - main ICD10: C92 Myeloid leukaemia                                                         | -0.2471 | 0.2858 | -0.8645 | 0.3873 |
| UKB   | Treatment/medication code: levocetirizine                                                             | 0.2958  | 0.3422 | 0.8642  | 0.3875 |
| UKB   | Treatment/medication code: folic acid product                                                         | -0.2199 | 0.2545 | -0.8641 | 0.3876 |
| UKB   | Diagnoses - main ICD10: F31 Bipolar affective disorder                                                | 0.0854  | 0.0997 | 0.8573  | 0.3913 |
| UKB   | Diagnoses - main ICD10: H71 Cholesteatoma of middle ear                                               | 0.252   | 0.2941 | 0.857   | 0.3914 |
| LDHUB | Mean Pallidum                                                                                         | 0.0807  | 0.0941 | 0.857   | 0.3914 |
| UKB   | Diagnoses - main ICD10: S00 Superficial injury of head                                                | 0.4376  | 0.5111 | 0.8562  | 0.3919 |
| UKB   | Underlying (primary) cause of death: ICD10: I25.1 Atherosclerotic heart disease                       | 0.1671  | 0.1965 | 0.8504  | 0.3951 |
| UKB   | Illness, injury, bereavement, stress in last 2 years: Serious illness, injury or assault of a close r | 0.0645  | 0.076  | 0.8485  | 0.3961 |
| UKB   | Treatment/medication code: thyroxine sodium                                                           | 0.146   | 0.1721 | 0.8482  | 0.3963 |
| UKB   | Manic/hyper symptoms: I was more talkative than usual                                                 | 0.4045  | 0.477  | 0.8479  | 0.3965 |
| UKB   | Diagnoses - main ICD10: R19 Other symptoms and signs involving the digestive system and al            | 0.7005  | 0.8271 | 0.8469  | 0.3971 |
| UKB   | Hearing aid user                                                                                      | 0.0703  | 0.0832 | 0.8447  | 0.3983 |
| UKB   | Diagnoses - main ICD10: S86 Injury of muscle and tendon at lower leg level                            | -0.1788 | 0.2117 | -0.8444 | 0.3984 |
| UKB   | Diagnoses - main ICD10: D36 Benign neoplasm of other and unspecified sites                            | 0.4225  | 0.5008 | 0.8437  | 0.3988 |
| UKB   | Cancer code, self-reported: unclassifiable                                                            | 0.1544  | 0.1837 | 0.8408  | 0.4005 |
| UKB   | Diagnoses - main ICD10: G37 Other demyelinating diseases of central nervous system                    | -0.1521 | 0.1812 | -0.8394 | 0.4012 |
| UKB   | Diagnoses - main ICD10: L30 Other dermatitis                                                          | -0.3671 | 0.4376 | -0.8391 | 0.4014 |
| UKB   | Diagnoses - main ICD10: I80 Phlebitis and thrombophlebitis                                            | 0.0697  | 0.0832 | 0.8368  | 0.4027 |
| UKB   | Diagnoses - main ICD10: T18 Foreign body in alimentary tract                                          | 0.146   | 0.1746 | 0.8361  | 0.4031 |
| UKB   | Treatment/medication code: berocca effervescent tablet                                                | -0.2142 | 0.2563 | -0.8357 | 0.4033 |
| UKB   | Treatment/medication code: depakote 250mg e/c tablet                                                  | 0.3112  | 0.3738 | 0.8325  | 0.4051 |
| UKB   | Diagnoses - main ICD10: H34 Retinal vascular occlusions                                               | 0.2603  | 0.3129 | 0.8319  | 0.4054 |
| UKB   | Reason for glasses/contact lenses: For a 'squint' or 'turn' in an eye since childhood (called 'str    | 0.0967  | 0.1167 | 0.8293  | 0.4069 |
| UKB   | Diagnoses - main ICD10: Z45 Adjustment and management of implanted device                             | 0.4957  | 0.5983 | 0.8286  | 0.4073 |
| UKB   | Why reduced smoking: Financial reasons                                                                | 0.1605  | 0.1949 | 0.8236  | 0.4102 |

|       |                                                                                               |         |        |         |        |
|-------|-----------------------------------------------------------------------------------------------|---------|--------|---------|--------|
| UKB   | Underlying (primary) cause of death: ICD10: C45.0 Mesothelioma of pleura                      | 0.1444  | 0.1761 | 0.8197  | 0.4124 |
| UKB   | Diagnoses - main ICD10: L57 Skin changes due to chronic exposure to nonionising radiation     | 0.4255  | 0.5191 | 0.8196  | 0.4124 |
| UKB   | Diagnoses - main ICD10: I25 Chronic ischaemic heart disease                                   | 0.0517  | 0.0632 | 0.8183  | 0.4132 |
| UKB   | Fractured bone site(s): Wrist                                                                 | 0.079   | 0.0966 | 0.8175  | 0.4137 |
| UKB   | Treatment/medication code: iodine 200mg tablet                                                | 0.1203  | 0.1472 | 0.8173  | 0.4138 |
| UKB   | Treatment/medication code: amiloride                                                          | 0.1292  | 0.1582 | 0.8168  | 0.4141 |
| UKB   | Treatment/medication code: mometasone                                                         | 0.1284  | 0.1573 | 0.8161  | 0.4144 |
| UKB   | Ever taken oral contraceptive pill                                                            | -0.0633 | 0.0777 | -0.815  | 0.4151 |
| UKB   | Diagnoses - main ICD10: S05 Injury of eye and orbit                                           | -0.2349 | 0.2887 | -0.8137 | 0.4158 |
| LDHUB | Birth weight                                                                                  | -0.0349 | 0.043  | -0.813  | 0.4162 |
| UKB   | Diagnoses - main ICD10: B37 Candidiasis                                                       | 0.5403  | 0.6655 | 0.8119  | 0.4169 |
| UKB   | Treatment/medication code: clarithromycin                                                     | 0.4557  | 0.5617 | 0.8113  | 0.4172 |
| UKB   | Diagnoses - main ICD10: D45 Polycythaemia vera                                                | 0.2693  | 0.3329 | 0.809   | 0.4185 |
| LDHUB | Cholesterol esters in medium VLDL                                                             | -0.0629 | 0.0779 | -0.8076 | 0.4193 |
| UKB   | Treatment/medication code: ismn - isosorbide mononitrate                                      | 0.3743  | 0.4638 | 0.8069  | 0.4197 |
| UKB   | Treatment/medication code: micronor tablet                                                    | -0.539  | 0.6696 | -0.805  | 0.4208 |
| UKB   | Non-cancer illness code, self-reported: trapped nerve/compressed nerve                        | 0.3154  | 0.3919 | 0.8048  | 0.4209 |
| UKB   | Treatment/medication code: penicillin                                                         | 0.2271  | 0.283  | 0.8025  | 0.4223 |
| UKB   | Gestational diabetes only                                                                     | 0.2997  | 0.3741 | 0.8012  | 0.423  |
| UKB   | Non-cancer illness code, self-reported: acne/acne vulgaris                                    | -0.1378 | 0.1724 | -0.7995 | 0.424  |
| UKB   | Illnesses of mother: High blood pressure                                                      | 0.0411  | 0.0516 | 0.796   | 0.426  |
| UKB   | Treatment/medication code: nexium 20mg tablet                                                 | 0.2094  | 0.2635 | 0.7949  | 0.4267 |
| UKB   | Diagnoses - main ICD10: L73 Other follicular disorders                                        | 0.1541  | 0.1945 | 0.7923  | 0.4282 |
| UKB   | Treatment/medication code: loperamide                                                         | 0.1403  | 0.1774 | 0.7912  | 0.4288 |
| LDHUB | Total cholesterol in medium VLDL                                                              | -0.0621 | 0.0785 | -0.7907 | 0.4291 |
| UKB   | Diagnoses - main ICD10: S66 Injury of muscle and tendon at wrist and hand level               | 0.1168  | 0.148  | 0.7897  | 0.4297 |
| UKB   | Treatment/medication code: tacrolimus                                                         | 0.2659  | 0.3378 | 0.7871  | 0.4312 |
| UKB   | Diagnoses - main ICD10: N45 Orchitis and epididymitis                                         | 0.2238  | 0.285  | 0.785   | 0.4324 |
| UKB   | Non-cancer illness code, self-reported: oesophagitis/barretts oesophagus                      | 0.1215  | 0.1551 | 0.7834  | 0.4334 |
| UKB   | Treatment/medication code: magnesium citrate                                                  | 0.2405  | 0.3076 | 0.782   | 0.4342 |
| UKB   | Diagnoses - main ICD10: S09 Other and unspecified injuries of head                            | 0.0807  | 0.1034 | 0.7804  | 0.4351 |
| UKB   | Diagnoses - main ICD10: E04 Other non-toxic goitre                                            | -0.0862 | 0.1104 | -0.7804 | 0.4352 |
| LDHUB | Total cholesterol in very large HDL                                                           | -0.1663 | 0.2134 | -0.7795 | 0.4357 |
| UKB   | Diagnoses - main ICD10: E07 Other disorders of thyroid                                        | -0.4015 | 0.5155 | -0.779  | 0.436  |
| UKB   | Treatment/medication code: cialis 20mg tablet                                                 | 0.2513  | 0.3227 | 0.7788  | 0.4361 |
| UKB   | Diagnoses - main ICD10: N02 Recurrent and persistent haematuria                               | 0.1776  | 0.2284 | 0.7776  | 0.4368 |
| UKB   | Underlying (primary) cause of death: ICD10: K55.9 Vascular disorder of intestine, unspecified | -0.122  | 0.1569 | -0.7774 | 0.4369 |
| UKB   | Underlying (primary) cause of death: ICD10: C67.9 Bladder, unspecified                        | -0.1406 | 0.1811 | -0.7765 | 0.4375 |
| UKB   | Non-cancer illness code, self-reported: nasal polyps                                          | 0.08    | 0.1031 | 0.7755  | 0.4381 |
| UKB   | Non-cancer illness code, self-reported: sleep apnoea                                          | 0.1066  | 0.1376 | 0.7746  | 0.4386 |
| UKB   | Diagnoses - main ICD10: N50 Other disorders of male genital organs                            | 0.1533  | 0.198  | 0.7746  | 0.4386 |
| UKB   | Diagnoses - main ICD10: O69 Labour and delivery complicated by umbilical cord complication    | -0.2822 | 0.3646 | -0.774  | 0.4389 |
| UKB   | Treatment/medication code: letrozole                                                          | 0.1107  | 0.143  | 0.7737  | 0.4391 |
| UKB   | Cancer code, self-reported: thyroid cancer                                                    | -0.1351 | 0.1746 | -0.7735 | 0.4392 |
| UKB   | Mineral and other dietary supplements: Iron                                                   | 0.1085  | 0.1407 | 0.7714  | 0.4405 |
| UKB   | Treatment/medication code: oxybutynin                                                         | -0.0998 | 0.1296 | -0.7699 | 0.4413 |
| UKB   | Treatment/medication code: implanon 68mg subdermal implant                                    | -0.3496 | 0.4548 | -0.7686 | 0.4421 |
| UKB   | Treatment/medication code: dovet ointment                                                     | 0.1528  | 0.1991 | 0.7678  | 0.4426 |
| UKB   | Non-cancer illness code, self-reported: enlarged prostate                                     | -0.0753 | 0.0986 | -0.7637 | 0.445  |
| UKB   | Non-cancer illness code, self-reported: prostatitis                                           | 0.4001  | 0.5241 | 0.7633  | 0.4453 |
| UKB   | Ever tried to stop smoking                                                                    | 0.3282  | 0.434  | 0.7562  | 0.4495 |
| UKB   | Diagnoses - main ICD10: D70 Agranulocytosis                                                   | -0.2158 | 0.2856 | -0.7557 | 0.4498 |
| UKB   | Diagnoses - main ICD10: L90 Atrophic disorders of skin                                        | 0.3876  | 0.5132 | 0.7553  | 0.4501 |
| UKB   | Non-cancer illness code, self-reported: tinnitus / tinitis                                    | -0.1812 | 0.2399 | -0.7551 | 0.4502 |
| UKB   | Non-cancer illness code, self-reported: testicular problems (not cancer)                      | -0.13   | 0.1722 | -0.7548 | 0.4504 |
| UKB   | Treatment/medication code: securon 40mg tablet                                                | 0.9178  | 1.216  | 0.7548  | 0.4504 |
| UKB   | Diagnoses - main ICD10: J32 Chronic sinusitis                                                 | 0.3061  | 0.4059 | 0.754   | 0.4508 |
| LDHUB | Serum creatinine                                                                              | 0.0344  | 0.0456 | 0.7532  | 0.4513 |
| UKB   | Treatment/medication code: phenobarbital                                                      | 0.103   | 0.1368 | 0.7529  | 0.4515 |
| UKB   | Diagnoses - main ICD10: I47 Paroxysmal tachycardia                                            | -0.1353 | 0.1801 | -0.7513 | 0.4525 |
| UKB   | Home area population density - urban or rural: Scotland - Accessible Rural                    | -0.5829 | 0.7769 | -0.7503 | 0.4531 |
| UKB   | Underlying (primary) cause of death: ICD10: C71.0 Cerebrum, except lobes and ventricles       | -0.565  | 0.7557 | -0.7476 | 0.4547 |
| LDHUB | Fasting proinsulin                                                                            | 0.072   | 0.0964 | 0.7468  | 0.4552 |

|       |                                                                                                |         |        |         |        |
|-------|------------------------------------------------------------------------------------------------|---------|--------|---------|--------|
| UKB   | Non-cancer illness code, self-reported: peritonitis                                            | 0.088   | 0.1185 | 0.7425  | 0.4578 |
| UKB   | Diagnoses - main ICD10: H00 Hordeolum and chalazion                                            | 0.2367  | 0.3191 | 0.7418  | 0.4582 |
| UKB   | Non-cancer illness code, self-reported: nephritis                                              | 0.3551  | 0.4809 | 0.7382  | 0.4604 |
| UKB   | Which eye(s) affected by astigmatism: Left eye                                                 | 0.1031  | 0.1399 | 0.7372  | 0.461  |
| LDHUB | 18:2 linoleic acid (LA)                                                                        | 0.0868  | 0.1181 | 0.7351  | 0.4623 |
| UKB   | Underlying (primary) cause of death: ICD10: C64 Malignant neoplasm of kidney, except renal     | 0.141   | 0.1919 | 0.735   | 0.4624 |
| UKB   | Eye problems/disorders: Macular degeneration                                                   | 0.1061  | 0.1444 | 0.7347  | 0.4625 |
| UKB   | Non-cancer illness code, self-reported: hereditary/genetic haematological disorder             | 0.1542  | 0.2107 | 0.7318  | 0.4643 |
| UKB   | Underlying (primary) cause of death: ICD10: X70.8 Other specified place                        | -0.1132 | 0.1553 | -0.7287 | 0.4662 |
| UKB   | Diagnoses - main ICD10: D22 Melanocytic naevi                                                  | 0.2532  | 0.348  | 0.7277  | 0.4668 |
| LDHUB | HOMA-B                                                                                         | 0.0584  | 0.0802 | 0.7275  | 0.4669 |
| UKB   | Non-cancer illness code, self-reported: fracture foot                                          | -0.1893 | 0.2603 | -0.7272 | 0.4671 |
| UKB   | Treatment/medication code: calcichew 1.25g chewable tablet                                     | 0.1756  | 0.2416 | 0.7268  | 0.4674 |
| UKB   | Treatment/medication code: sodium thyroxine                                                    | 0.3744  | 0.5158 | 0.7258  | 0.468  |
| UKB   | Diagnoses - main ICD10: Z48 Other surgical follow-up care                                      | 0.1073  | 0.1483 | 0.7236  | 0.4693 |
| LDHUB | Phospholipids in large LDL                                                                     | 0.1096  | 0.152  | 0.7214  | 0.4706 |
| LDHUB | Free cholesterol in medium VLDL                                                                | -0.0571 | 0.0793 | -0.7201 | 0.4715 |
| UKB   | Treatment/medication code: calcium carbonate+cholecalciferol 1.25g/5micrograms tablet          | 0.0823  | 0.1146 | 0.7183  | 0.4725 |
| UKB   | Doctor diagnosed bronchiectasis                                                                | -0.1388 | 0.1933 | -0.7179 | 0.4728 |
| UKB   | Non-cancer illness code, self-reported: spontaneous pneumothorax/recurrent pneumothorax        | 0.1087  | 0.1515 | 0.7174  | 0.4731 |
| LDHUB | Free cholesterol to esterified cholesterol ratio                                               | 0.1202  | 0.1676 | 0.7175  | 0.4731 |
| UKB   | Treatment/medication code: telmisartan                                                         | 0.0903  | 0.1259 | 0.717   | 0.4733 |
| UKB   | Diagnoses - main ICD10: H81 Disorders of vestibular function                                   | 0.1964  | 0.2743 | 0.7159  | 0.474  |
| UKB   | Treatment/medication code: dixarit 25mcg tablet                                                | 0.5594  | 0.7818 | 0.7156  | 0.4743 |
| UKB   | Non-cancer illness code, self-reported: encephalitis                                           | 0.1878  | 0.2626 | 0.7152  | 0.4745 |
| UKB   | Underlying (primary) cause of death: ICD10: K76.0 Fatty (change of) liver, not elsewhere class | -0.1039 | 0.1456 | -0.7133 | 0.4757 |
| UKB   | Treatment/medication code: perindopril                                                         | -0.0675 | 0.0947 | -0.7131 | 0.4758 |
| LDHUB | Mean diameter for LDL particles                                                                | -0.1146 | 0.161  | -0.7119 | 0.4766 |
| UKB   | Diagnoses - main ICD10: S56 Injury of muscle and tendon at forearm level                       | 0.5302  | 0.7458 | 0.711   | 0.4771 |
| UKB   | Non-cancer illness code, self-reported: fracture shaft of femur                                | -0.1162 | 0.1636 | -0.7102 | 0.4776 |
| UKB   | Diagnoses - main ICD10: C25 Malignant neoplasm of pancreas                                     | 0.09    | 0.1268 | 0.7097  | 0.4779 |
| UKB   | Diagnoses - main ICD10: K35 Acute appendicitis                                                 | 0.1146  | 0.162  | 0.7074  | 0.4793 |
| UKB   | Diagnoses - main ICD10: I05 Rheumatic mitral valve diseases                                    | 0.2418  | 0.3421 | 0.7067  | 0.4798 |
| UKB   | Treatment/medication code: flixotide 25micrograms inhaler                                      | 0.1347  | 0.1908 | 0.7058  | 0.4803 |
| UKB   | Diagnoses - main ICD10: R52 Pain, not elsewhere classified                                     | 0.2015  | 0.2856 | 0.7056  | 0.4805 |
| UKB   | Treatment/medication code: aciclovir                                                           | 0.1321  | 0.1875 | 0.7046  | 0.4811 |
| UKB   | Current employment status: Full or part-time student                                           | -0.1554 | 0.2215 | -0.7018 | 0.4828 |
| UKB   | Treatment/medication code: azithromycin                                                        | 0.1728  | 0.2463 | 0.7017  | 0.4829 |
| UKB   | Hair/balding pattern: Pattern 4                                                                | -0.0323 | 0.0462 | -0.6997 | 0.4841 |
| UKB   | Diagnoses - main ICD10: K00 Disorders of tooth development and eruption                        | 0.1344  | 0.1921 | 0.6996  | 0.4842 |
| UKB   | Diagnoses - main ICD10: H60 Otitis externa                                                     | 0.1441  | 0.2061 | 0.6993  | 0.4844 |
| UKB   | Diagnoses - main ICD10: G58 Other mononeuropathies                                             | 0.2011  | 0.2878 | 0.699   | 0.4846 |
| UKB   | Average weekly intake of other alcoholic drinks                                                | 0.0952  | 0.1363 | 0.6985  | 0.4848 |
| UKB   | Treatment/medication code: nitrofurantoin                                                      | 0.1611  | 0.2306 | 0.6986  | 0.4848 |
| UKB   | Treatment/medication code: betnovate cream                                                     | 0.1399  | 0.2004 | 0.6983  | 0.485  |
| LDHUB | Mean platelet volume                                                                           | 0.0431  | 0.0618 | 0.6978  | 0.4853 |
| UKB   | Treatment/medication code: evening primrose oil                                                | -0.114  | 0.1639 | -0.6955 | 0.4867 |
| UKB   | Treatment/medication code: almotriptan                                                         | -0.1096 | 0.1582 | -0.6927 | 0.4885 |
| UKB   | Diagnoses - main ICD10: F20 Schizophrenia                                                      | 0.1714  | 0.248  | 0.6909  | 0.4896 |
| UKB   | Non-cancer illness code, self-reported: polio / poliomyelitis                                  | -0.0882 | 0.1278 | -0.6903 | 0.49   |
| UKB   | Illnesses of father: Prostate cancer                                                           | 0.0618  | 0.0895 | 0.69    | 0.4902 |
| UKB   | Cancer code, self-reported: prostate cancer                                                    | 0.0744  | 0.108  | 0.6888  | 0.491  |
| UKB   | Non-cancer illness code, self-reported: infective/viral hepatitis                              | 0.1851  | 0.2704 | 0.6847  | 0.4935 |
| UKB   | Non-cancer illness code, self-reported: dry eyes                                               | 0.7089  | 1.0355 | 0.6846  | 0.4936 |
| UKB   | Doctor diagnosed hayfever or allergic rhinitis                                                 | -0.0358 | 0.0525 | -0.6829 | 0.4947 |
| UKB   | Treatment/medication code: asacol mr 400mg e/c tablet                                          | -0.1217 | 0.1785 | -0.6821 | 0.4952 |
| UKB   | Diagnoses - main ICD10: F45 Somatoform disorders                                               | 0.176   | 0.258  | 0.6821  | 0.4952 |
| UKB   | Diagnoses - main ICD10: C80 Malignant neoplasm without specification of site                   | -0.7356 | 1.0787 | -0.682  | 0.4953 |
| UKB   | Non-cancer illness code, self-reported: bursitis                                               | 0.1505  | 0.2209 | 0.6815  | 0.4955 |
| UKB   | Underlying (primary) cause of death: ICD10: K92.2 Gastro-intestinal haemorrhage, unspecified   | -0.3843 | 0.5644 | -0.6809 | 0.4959 |
| UKB   | Non-cancer illness code, self-reported: peripheral vascular disease                            | 0.0921  | 0.1357 | 0.6789  | 0.4972 |
| UKB   | Non-cancer illness code, self-reported: obsessive compulsive disorder (ocd)                    | -0.116  | 0.1714 | -0.6771 | 0.4984 |
| UKB   | Diagnoses - main ICD10: L08 Other local infections of skin and subcutaneous tissue             | 0.1216  | 0.1797 | 0.6767  | 0.4986 |

|       |                                                                                                |         |        |         |        |
|-------|------------------------------------------------------------------------------------------------|---------|--------|---------|--------|
| LDHUB | Ratio of bisallylic groups to double bonds                                                     | -0.0455 | 0.0675 | -0.6742 | 0.5002 |
| UKB   | Years of cough on most days                                                                    | -0.1297 | 0.1925 | -0.6735 | 0.5006 |
| UKB   | Reason for glasses/contact lenses: For a 'lazy' eye or an eye with poor vision since childhood | 0.0948  | 0.1408 | 0.6734  | 0.5007 |
| UKB   | Cancer code, self-reported: cin/pre-cancer cells cervix                                        | 0.0867  | 0.1288 | 0.673   | 0.5009 |
| UKB   | Diagnoses - main ICD10: Z80 Family history of malignant neoplasm                               | -0.1474 | 0.2195 | -0.6715 | 0.5019 |
| UKB   | Underlying (primary) cause of death: ICD10: I71.0 Dissection of aorta [any part]               | 0.3698  | 0.5525 | 0.6693  | 0.5033 |
| UKB   | Target heart rate achieved                                                                     | -0.0738 | 0.1103 | -0.6686 | 0.5038 |
| UKB   | Non-cancer illness code, self-reported: transient ischaemic attack (tia)                       | 0.1198  | 0.1792 | 0.6683  | 0.5039 |
| UKB   | Diagnoses - main ICD10: H43 Disorders of vitreous body                                         | -0.2948 | 0.4424 | -0.6664 | 0.5052 |
| UKB   | Diagnoses - main ICD10: L98 Other disorders of skin and subcutaneous tissue, not elsewhere     | 0.0772  | 0.1161 | 0.6651  | 0.506  |
| LDHUB | Concentration of very large HDL particles                                                      | -0.086  | 0.1293 | -0.6651 | 0.506  |
| UKB   | Vitamin and mineral supplements: Vitamin D                                                     | -0.0666 | 0.1007 | -0.6617 | 0.5082 |
| UKB   | Non-cancer illness code, self-reported: iron deficiency anaemia                                | 0.0804  | 0.1216 | 0.6614  | 0.5084 |
| UKB   | Diagnoses - main ICD10: I62 Other nontraumatic intracranial haemorrhage                        | -0.2399 | 0.3634 | -0.6601 | 0.5092 |
| UKB   | Treatment/medication code: azopt 10mg/ml eye drops                                             | -0.2037 | 0.3089 | -0.6595 | 0.5096 |
| LDHUB | Urinary albumin-to-creatinine ratio (non-diabetes)                                             | 0.0607  | 0.0923 | 0.6576  | 0.5108 |
| UKB   | Diagnoses - main ICD10: S68 Traumatic amputation of wrist and hand                             | 0.3631  | 0.5522 | 0.6575  | 0.5109 |
| UKB   | Treatment/medication code: fosinopril                                                          | 0.125   | 0.1905 | 0.6564  | 0.5115 |
| LDHUB | Leucine                                                                                        | -0.0763 | 0.1162 | -0.6563 | 0.5116 |
| LDHUB | Attention deficit hyperactivity disorder                                                       | 0.1057  | 0.1612 | 0.656   | 0.5118 |
| UKB   | Non-cancer illness code, self-reported: chronic sinusitis                                      | 0.1297  | 0.198  | 0.6549  | 0.5125 |
| UKB   | Treatment/medication code: alendronate sodium                                                  | -0.05   | 0.0765 | -0.6541 | 0.513  |
| UKB   | Treatment/medication code: macrogol ointment                                                   | 0.2635  | 0.4032 | 0.6536  | 0.5133 |
| UKB   | Non-cancer illness code, self-reported: fracture lower leg / ankle                             | 0.469   | 0.7213 | 0.6502  | 0.5155 |
| UKB   | Which eye(s) affected by hypermetropia (long sight): Left eye                                  | 0.1574  | 0.2421 | 0.6502  | 0.5156 |
| LDHUB | Isoleucine                                                                                     | -0.0621 | 0.0955 | -0.6498 | 0.5158 |
| UKB   | Diagnoses - main ICD10: G93 Other disorders of brain                                           | 0.355   | 0.5464 | 0.6496  | 0.5159 |
| UKB   | Treatment/medication code: beclomethasone                                                      | 0.1741  | 0.2682 | 0.6491  | 0.5162 |
| LDHUB | Eczema                                                                                         | 0.0481  | 0.0741 | 0.6493  | 0.5162 |
| UKB   | Diagnoses - main ICD10: M16 Coxarthrosis [arthrosis of hip]                                    | 0.0507  | 0.0783 | 0.6484  | 0.5167 |
| UKB   | Treatment/medication code: trazodone                                                           | 0.747   | 1.1542 | 0.6472  | 0.5175 |
| UKB   | Diagnoses - main ICD10: O90 Complications of the puerperium, not elsewhere classified          | 0.1556  | 0.2407 | 0.6466  | 0.5179 |
| UKB   | Underlying (primary) cause of death: ICD10: I51.7 Cardiomegaly                                 | -0.7565 | 1.1782 | -0.6421 | 0.5208 |
| UKB   | Reason for reducing amount of alcohol drunk: Health precaution                                 | -0.0435 | 0.0677 | -0.6419 | 0.521  |
| UKB   | Diagnoses - main ICD10: M22 Disorders of patella                                               | 0.2045  | 0.3187 | 0.6415  | 0.5212 |
| UKB   | Time spent driving                                                                             | 0.0362  | 0.0569 | 0.6366  | 0.5244 |
| LDHUB | Free cholesterol in large LDL                                                                  | 0.0968  | 0.1522 | 0.6365  | 0.5245 |
| UKB   | Illnesses of mother: Parkinson's disease                                                       | -0.6895 | 1.0836 | -0.6363 | 0.5246 |
| UKB   | Non-cancer illness code, self-reported: inflammatory bowel disease                             | 0.1164  | 0.1833 | 0.6351  | 0.5254 |
| LDHUB | Total cholesterol in large LDL                                                                 | 0.0952  | 0.1501 | 0.6343  | 0.5259 |
| UKB   | Treatment/medication code: indometacin                                                         | -0.1455 | 0.2302 | -0.6322 | 0.5273 |
| UKB   | Treatment/medication code: flixonase 50micrograms aqueous nasal spray                          | -0.0797 | 0.1262 | -0.6313 | 0.5278 |
| UKB   | Diagnoses - main ICD10: J33 Nasal polyp                                                        | 0.0775  | 0.1228 | 0.631   | 0.528  |
| UKB   | Non-cancer illness code, self-reported: multiple sclerosis                                     | -0.0929 | 0.1474 | -0.6302 | 0.5286 |
| UKB   | Diagnoses - main ICD10: M05 Seropositive rheumatoid arthritis                                  | -0.1025 | 0.1627 | -0.63   | 0.5287 |
| UKB   | Underlying (primary) cause of death: ICD10: E85.4 Organ-limited amyloidosis                    | -0.1458 | 0.2318 | -0.6289 | 0.5294 |
| UKB   | Diagnoses - main ICD10: R12 Heartburn                                                          | 0.1696  | 0.2703 | 0.6277  | 0.5302 |
| UKB   | Non-cancer illness code, self-reported: hepatitis b                                            | 0.1343  | 0.2141 | 0.6273  | 0.5304 |
| UKB   | Treatment/medication code: lipitor 10mg tablet                                                 | 0.5263  | 0.8412 | 0.6257  | 0.5315 |
| UKB   | Non-cancer illness code, self-reported: eczema/dermatitis                                      | -0.0515 | 0.0823 | -0.6254 | 0.5317 |
| UKB   | Treatment/medication code: senokot 7.5mg tablet                                                | 0.1246  | 0.1995 | 0.6247  | 0.5321 |
| UKB   | Diagnoses - main ICD10: N94 Pain and other conditions associated with female genital organs    | 0.1975  | 0.3167 | 0.6237  | 0.5328 |
| LDHUB | Free cholesterol in medium HDL                                                                 | 0.0784  | 0.1264 | 0.6202  | 0.5351 |
| LDHUB | Total lipids in very large HDL                                                                 | -0.0965 | 0.1558 | -0.6194 | 0.5357 |
| UKB   | Non-accidental death in close genetic family                                                   | 0.0649  | 0.1051 | 0.6173  | 0.537  |
| UKB   | Diagnoses - main ICD10: L82 Seborrhoeic keratosis                                              | 0.195   | 0.3158 | 0.6173  | 0.537  |
| UKB   | Non-cancer illness code, self-reported: inguinal hernia                                        | -0.2005 | 0.326  | -0.615  | 0.5386 |
| UKB   | Underlying (primary) cause of death: ICD10: C10.9 Oropharynx, unspecified                      | 0.2686  | 0.437  | 0.6145  | 0.5389 |
| UKB   | Underlying (primary) cause of death: ICD10: C23 Malignant neoplasm of gallbladder              | -0.1051 | 0.1712 | -0.6137 | 0.5394 |
| UKB   | Treatment/medication code: terbutaline                                                         | 0.1938  | 0.3167 | 0.612   | 0.5406 |
| UKB   | Treatment/medication code: amantadine                                                          | 0.2547  | 0.4168 | 0.6111  | 0.5411 |
| UKB   | Treatment/medication code: hypromellose                                                        | 0.3721  | 0.6089 | 0.6111  | 0.5412 |
| LDHUB | Total lipids in large VLDL                                                                     | -0.0501 | 0.0823 | -0.6086 | 0.5428 |

|       |                                                                                          |         |        |         |        |
|-------|------------------------------------------------------------------------------------------|---------|--------|---------|--------|
| UKB   | Diagnoses - main ICD10: D24 Benign neoplasm of breast                                    | 0.1694  | 0.279  | 0.6074  | 0.5436 |
| LDHUB | Serum total triglycerides                                                                | -0.0463 | 0.0763 | -0.6067 | 0.5441 |
| UKB   | Treatment/medication code: estraderm mx 25 patch                                         | 0.2778  | 0.4608 | 0.6029  | 0.5466 |
| UKB   | Treatment/medication code: phenytoin                                                     | 0.0775  | 0.1288 | 0.6015  | 0.5475 |
| UKB   | Non-cancer illness code, self-reported: stress                                           | 0.4494  | 0.7479 | 0.6009  | 0.5479 |
| UKB   | Treatment/medication code: kiofem tablet                                                 | 0.1618  | 0.2699 | 0.5995  | 0.5488 |
| UKB   | Diagnoses - main ICD10: R61 Hyperhidrosis                                                | 0.1297  | 0.2166 | 0.5989  | 0.5492 |
| UKB   | Treatment/medication code: hydroxocobalamin product                                      | 0.4553  | 0.7617 | 0.5977  | 0.5501 |
| UKB   | Diagnoses - main ICD10: K59 Other functional intestinal disorders                        | 0.0968  | 0.162  | 0.5974  | 0.5502 |
| UKB   | Diagnoses - main ICD10: I12 Hypertensive renal disease                                   | 0.1028  | 0.1722 | 0.5973  | 0.5503 |
| UKB   | Diagnoses - main ICD10: D47 Other neoplasms of uncertain or unknown behaviour of lymphoc | -0.1634 | 0.2739 | -0.5964 | 0.5509 |
| UKB   | Non-cancer illness code, self-reported: polymyalgia rheumatica                           | 0.0667  | 0.1119 | 0.5957  | 0.5514 |
| UKB   | Treatment/medication code: imigran 50mg tablet                                           | 0.0635  | 0.1067 | 0.5956  | 0.5514 |
| LDHUB | Triglycerides in large VLDL                                                              | -0.0494 | 0.0832 | -0.5941 | 0.5525 |
| LDHUB | Phospholipids in medium LDL                                                              | 0.0801  | 0.135  | 0.5935  | 0.5529 |
| UKB   | Illnesses of siblings: Parkinson's disease                                               | 0.5606  | 0.9491 | 0.5907  | 0.5547 |
| UKB   | Treatment/medication code: food supplement/plant/herbal extract                          | 0.0818  | 0.139  | 0.5886  | 0.5561 |
| UKB   | Treatment/medication code: mirtazapine                                                   | 0.8928  | 1.5174 | 0.5884  | 0.5563 |
| UKB   | Diagnoses - main ICD10: C82 Follicular [nodular] non-Hodgkin's lymphoma                  | 0.1758  | 0.2999 | 0.5864  | 0.5576 |
| UKB   | Underlying (primary) cause of death: ICD10: M06.9 Rheumatoid arthritis, unspecified      | 0.1626  | 0.2795 | 0.5816  | 0.5608 |
| UKB   | Non-cancer illness code, self-reported: thyroid problem (not cancer)                     | 0.2148  | 0.3695 | 0.5812  | 0.5611 |
| LDHUB | Total cholesterol in medium LDL                                                          | 0.0843  | 0.1456 | 0.579   | 0.5626 |
| UKB   | Treatment/medication code: omacor 1g capsule                                             | 0.6136  | 1.0607 | 0.5785  | 0.5629 |
| LDHUB | Transferrin                                                                              | -0.0511 | 0.0887 | -0.5763 | 0.5644 |
| UKB   | Treatment/medication code: xenical 120mg capsule                                         | 0.161   | 0.2799 | 0.5752  | 0.5652 |
| UKB   | Non-cancer illness code, self-reported: tendonitis / tendinitis / tenosynovitis          | 0.1075  | 0.1877 | 0.5729  | 0.5667 |
| UKB   | Underlying (primary) cause of death: ICD10: C84.5 Other and unspecified T-cell lymphomas | -0.0922 | 0.1609 | -0.5729 | 0.5667 |
| UKB   | Treatment/medication code: phenergan 10mg tablet                                         | 0.1552  | 0.2716 | 0.5712  | 0.5678 |
| UKB   | Diagnoses - main ICD10: O70 Perineal laceration during delivery                          | -0.2102 | 0.3684 | -0.5707 | 0.5682 |
| UKB   | Diagnoses - main ICD10: N70 Salpingitis and oophoritis                                   | 0.5081  | 0.8907 | 0.5704  | 0.5684 |
| LDHUB | Triglycerides in small HDL                                                               | 0.0634  | 0.1115 | 0.5688  | 0.5695 |
| UKB   | Treatment/medication code: thyroxine product                                             | 0.0457  | 0.0806 | 0.5678  | 0.5701 |
| UKB   | Treatment/medication code: kelp+garlic product                                           | 0.093   | 0.1641 | 0.5668  | 0.5709 |
| UKB   | Non-cancer illness code, self-reported: brain haemorrhage                                | -0.272  | 0.4822 | -0.5641 | 0.5727 |
| UKB   | Diagnoses - main ICD10: N17 Acute renal failure                                          | 0.2647  | 0.4692 | 0.5641  | 0.5727 |
| LDHUB | Mean diameter for HDL particles                                                          | -0.0533 | 0.0948 | -0.5623 | 0.5739 |
| UKB   | Non-cancer illness code, self-reported: pericardial problem                              | 0.2486  | 0.4422 | 0.5621  | 0.5741 |
| UKB   | Diagnoses - main ICD10: F30 Manic episode                                                | -0.0892 | 0.1589 | -0.5617 | 0.5744 |
| LDHUB | Free cholesterol in very large HDL                                                       | -0.0892 | 0.1591 | -0.5609 | 0.5749 |
| UKB   | Tobacco smoking: Occasionally                                                            | 0.0692  | 0.1241 | 0.558   | 0.5769 |
| UKB   | Diagnoses - main ICD10: R25 Abnormal involuntary movements                               | 0.2224  | 0.3993 | 0.5571  | 0.5775 |
| UKB   | Non-cancer illness code, self-reported: pneumothorax                                     | 0.07    | 0.1263 | 0.5543  | 0.5794 |
| UKB   | Treatment/medication code: eumovate cream                                                | 0.2167  | 0.3909 | 0.5543  | 0.5794 |
| UKB   | Non-cancer illness code, self-reported: eye/eyelid problem                               | 0.1778  | 0.3217 | 0.5528  | 0.5804 |
| UKB   | Diagnoses - main ICD10: G24 Dystonia                                                     | 0.1384  | 0.2505 | 0.5525  | 0.5806 |
| UKB   | Treatment/medication code: valsartan                                                     | 0.0702  | 0.1273 | 0.5518  | 0.5811 |
| UKB   | Treatment/medication code: calcium carbonate+colecalciferol 1.25g/5micrograms tablet     | 0.3303  | 0.5993 | 0.5511  | 0.5816 |
| LDHUB | Phospholipids in very large HDL                                                          | -0.0625 | 0.1135 | -0.5508 | 0.5818 |
| UKB   | Non-cancer illness code, self-reported: hepatitis a                                      | -0.1384 | 0.252  | -0.5494 | 0.5827 |
| UKB   | Treatment/medication code: migril tablet                                                 | 0.0864  | 0.1577 | 0.5478  | 0.5838 |
| UKB   | Treatment/medication code: amias 2mg tablet                                              | 0.1399  | 0.2568 | 0.5449  | 0.5858 |
| UKB   | Treatment/medication code: carvedilol                                                    | -0.11   | 0.2019 | -0.5447 | 0.586  |
| UKB   | Treatment/medication code: calcichew d3 tablet                                           | -0.0584 | 0.1078 | -0.542  | 0.5878 |
| UKB   | Non-cancer illness code, self-reported: urticaria                                        | -0.1526 | 0.2819 | -0.5413 | 0.5883 |
| UKB   | Treatment/medication code: luteine                                                       | -0.2288 | 0.4234 | -0.5402 | 0.589  |
| UKB   | Non-cancer illness code, self-reported: hypopituitarism                                  | 0.4083  | 0.7576 | 0.5389  | 0.5899 |
| UKB   | Treatment/medication code: tibolone                                                      | 0.1159  | 0.2155 | 0.5378  | 0.5907 |
| UKB   | Diagnoses - main ICD10: K25 Gastric ulcer                                                | 0.9029  | 1.6808 | 0.5372  | 0.5911 |
| UKB   | Non-cancer illness code, self-reported: fracture face / orbit / eye socket               | 0.4541  | 0.8468 | 0.5363  | 0.5918 |
| UKB   | Treatment/medication code: zolmitriptan                                                  | 0.087   | 0.1624 | 0.5357  | 0.5922 |
| UKB   | Treatment/medication code: microgynon 30 tablet                                          | 0.1653  | 0.3094 | 0.5341  | 0.5933 |
| UKB   | Cancer code, self-reported: lymphoma                                                     | -0.1671 | 0.3132 | -0.5335 | 0.5937 |
| UKB   | Treatment/medication code: prednisolone                                                  | 0.0652  | 0.1223 | 0.5327  | 0.5942 |

|       |                                                                                              |         |        |         |        |
|-------|----------------------------------------------------------------------------------------------|---------|--------|---------|--------|
| UKB   | Underlying (primary) cause of death: ICD10: A41.9 Septicaemia, unspecified                   | 0.1494  | 0.2814 | 0.5311  | 0.5954 |
| UKB   | Diagnoses - main ICD10: B34 Viral infection of unspecified site                              | 0.5203  | 0.9804 | 0.5307  | 0.5956 |
| LDHUB | Bipolar disorder                                                                             | 0.0313  | 0.059  | 0.5308  | 0.5956 |
| UKB   | Diagnoses - main ICD10: J13 Pneumonia due to Streptococcus pneumoniae                        | -0.2359 | 0.4446 | -0.5306 | 0.5957 |
| UKB   | Vitamin and mineral supplements: Folic acid or Folate (Vit B9)                               | 0.0984  | 0.1872 | 0.5254  | 0.5993 |
| UKB   | Treatment/medication code: losec 10mg capsule                                                | 0.291   | 0.5543 | 0.525   | 0.5995 |
| LDHUB | Cholesterol esters in medium LDL                                                             | 0.0749  | 0.1427 | 0.5247  | 0.5998 |
| UKB   | Treatment/medication code: anastrozole                                                       | 0.1367  | 0.2607 | 0.5244  | 0.6    |
| UKB   | Treatment/medication code: glucophage 500mg tablet                                           | 0.3848  | 0.7354 | 0.5232  | 0.6008 |
| UKB   | Ever had bowel cancer screening                                                              | 0.0428  | 0.0822 | 0.5211  | 0.6023 |
| UKB   | Non-cancer illness code, self-reported: fracture shoulder / scapula                          | -0.1953 | 0.3758 | -0.5198 | 0.6032 |
| UKB   | Diagnoses - main ICD10: I31 Other diseases of pericardium                                    | 0.1791  | 0.3447 | 0.5196  | 0.6033 |
| UKB   | Treatment/medication code: zomig 2.5mg tablet                                                | -0.0506 | 0.0976 | -0.5188 | 0.6039 |
| LDHUB | Serum creatinine (non-diabetes)                                                              | 0.0245  | 0.0473 | 0.5181  | 0.6044 |
| UKB   | Underlying (primary) cause of death: ICD10: J84.1 Other interstitial pulmonary diseases with | -0.0941 | 0.1822 | -0.5166 | 0.6054 |
| UKB   | Treatment/medication code: monomax xl 60mg m/r tablet                                        | 0.0966  | 0.1874 | 0.5152  | 0.6064 |
| LDHUB | Average number of double bonds in a fatty acid chain                                         | 0.0422  | 0.0821 | 0.5136  | 0.6076 |
| UKB   | Which eye(s) affected by presbyopia: Right eye                                               | 0.2239  | 0.4367 | 0.5127  | 0.6081 |
| UKB   | Underlying (primary) cause of death: ICD10: K70.1 Alcoholic hepatitis                        | -0.1982 | 0.387  | -0.5121 | 0.6086 |
| UKB   | Treatment/medication code: estradiol product                                                 | 0.5458  | 1.0686 | 0.5108  | 0.6095 |
| UKB   | Treatment/medication code: colofac-100 tablet                                                | 0.178   | 0.3491 | 0.5099  | 0.6101 |
| UKB   | Treatment/medication code: iron sulphate                                                     | 0.1897  | 0.3724 | 0.5093  | 0.6105 |
| UKB   | Non-cancer illness code, self-reported: hypertrophic cardiomyopathy (hcm / hocm)             | 0.1637  | 0.3221 | 0.5084  | 0.6112 |
| LDHUB | Concentration of large VLDL particles                                                        | -0.041  | 0.0806 | -0.5078 | 0.6116 |
| UKB   | Treatment/medication code: neoclarityn 5mg tablet                                            | -0.0701 | 0.1389 | -0.5048 | 0.6137 |
| UKB   | Treatment/medication code: norgeston tablet                                                  | 0.2728  | 0.5421 | 0.5032  | 0.6148 |
| UKB   | Number of spontaneous miscarriages                                                           | 0.0608  | 0.1209 | 0.5027  | 0.6152 |
| UKB   | Non-cancer illness code, self-reported: liver failure/cirrhosis                              | 0.1248  | 0.2486 | 0.5021  | 0.6156 |
| UKB   | Diagnoses - main ICD10: J39 Other diseases of upper respiratory tract                        | -0.0956 | 0.1906 | -0.5013 | 0.6161 |
| UKB   | Treatment/medication code: warfarin                                                          | 0.0515  | 0.1029 | 0.5008  | 0.6165 |
| UKB   | Non-cancer illness code, self-reported: breast fibroadenoma                                  | 0.0798  | 0.1597 | 0.4997  | 0.6173 |
| UKB   | Diagnoses - main ICD10: O02 Other abnormal products of conception                            | 0.1485  | 0.2971 | 0.4996  | 0.6173 |
| UKB   | Treatment/medication code: bimatoprost                                                       | 0.0795  | 0.1594 | 0.4985  | 0.6181 |
| UKB   | Illnesses of mother: Bowel cancer                                                            | 0.0501  | 0.1007 | 0.4973  | 0.619  |
| LDHUB | Total cholesterol in medium HDL                                                              | 0.0745  | 0.1502 | 0.4964  | 0.6196 |
| UKB   | Non-cancer illness code, self-reported: cerebral aneurysm                                    | 0.0703  | 0.1418 | 0.4962  | 0.6198 |
| UKB   | Diagnoses - main ICD10: R56 Convulsions, not elsewhere classified                            | 0.1392  | 0.2813 | 0.4949  | 0.6206 |
| LDHUB | Concentration of medium LDL particles                                                        | 0.0707  | 0.1438 | 0.4917  | 0.6229 |
| UKB   | Diagnoses - main ICD10: I63 Cerebral infarction                                              | 0.2138  | 0.4373 | 0.4889  | 0.6249 |
| UKB   | Non-cancer illness code, self-reported: breast cysts                                         | -0.2637 | 0.5403 | -0.488  | 0.6256 |
| UKB   | Diagnoses - main ICD10: R35 Polyuria                                                         | 0.0703  | 0.1443 | 0.4872  | 0.6261 |
| UKB   | Non-cancer illness code, self-reported: benign neuroma                                       | 0.1301  | 0.2687 | 0.4843  | 0.6282 |
| UKB   | Non-cancer illness code, self-reported: respiratory infection                                | 0.2028  | 0.4192 | 0.4836  | 0.6286 |
| UKB   | Treatment/medication code: migravele tablet                                                  | -0.1906 | 0.3939 | -0.4838 | 0.6286 |
| UKB   | Treatment/medication code: oramorph 10mg/5ml oral solution                                   | 0.5041  | 1.0439 | 0.4829  | 0.6292 |
| UKB   | Treatment/medication code: diclomax sr 75mg m/r capsule                                      | 0.0819  | 0.1696 | 0.4828  | 0.6292 |
| LDHUB | Mean diameter for VLDL particles                                                             | -0.0358 | 0.0742 | -0.4818 | 0.6299 |
| UKB   | Underlying (primary) cause of death: ICD10: K70.4 Alcoholic hepatic failure                  | 0.1033  | 0.2144 | 0.4817  | 0.63   |
| LDHUB | Alanine                                                                                      | -0.0447 | 0.0928 | -0.4817 | 0.63   |
| UKB   | Hair/balding pattern: Pattern 2                                                              | 0.0253  | 0.0526 | 0.4812  | 0.6304 |
| LDHUB | Forced expiratory volume in 1 second (FEV1)/Forced Vital capacity(FVC)                       | -0.0234 | 0.0486 | -0.4809 | 0.6306 |
| LDHUB | Chronic Kidney Disease                                                                       | -0.0439 | 0.0916 | -0.4791 | 0.6319 |
| UKB   | Non-cancer illness code, self-reported: rosacea                                              | -0.1314 | 0.2749 | -0.4781 | 0.6326 |
| UKB   | Treatment/medication code: arimidex 1mg tablet                                               | -0.4927 | 1.0324 | -0.4772 | 0.6332 |
| UKB   | Diagnoses - main ICD10: K61 Abscess of anal and rectal regions                               | 0.1496  | 0.3138 | 0.4766  | 0.6336 |
| UKB   | Treatment/medication code: crestor 10mg tablet                                               | -0.1171 | 0.2457 | -0.4766 | 0.6337 |
| UKB   | Underlying (primary) cause of death: ICD10: C80.9 Malignant neoplasm, unspecified            | 0.1012  | 0.2127 | 0.476   | 0.6341 |
| UKB   | Non-cancer illness code, self-reported: anorexia/bulimia/other eating disorder               | 0.2836  | 0.5965 | 0.4754  | 0.6345 |
| UKB   | Diagnoses - main ICD10: K40 Inguinal hernia                                                  | 0.028   | 0.0591 | 0.474   | 0.6355 |
| UKB   | Impedance of leg (right)                                                                     | -0.0133 | 0.028  | -0.4738 | 0.6356 |
| UKB   | Diagnoses - main ICD10: Q18 Other congenital malformations of face and neck                  | 0.1617  | 0.3421 | 0.4727  | 0.6364 |
| UKB   | Non-cancer illness code, self-reported: acute infective polyneuritis/guillain-barre syndrome | -0.0637 | 0.1349 | -0.4721 | 0.6369 |
| UKB   | Non-cancer illness code, self-reported: hiv/aids                                             | 0.1079  | 0.2285 | 0.472   | 0.6369 |

|       |                                                                                            |         |        |         |        |
|-------|--------------------------------------------------------------------------------------------|---------|--------|---------|--------|
| LDHUB | Phospholipids in large VLDL                                                                | -0.0387 | 0.0822 | -0.4707 | 0.6378 |
| UKB   | Non-cancer illness code, self-reported: cervical polyps                                    | -0.4924 | 1.0505 | -0.4687 | 0.6393 |
| LDHUB | Omega-9 and saturated fatty acids                                                          | 0.0614  | 0.131  | 0.4685  | 0.6394 |
| UKB   | Heel bone mineral density (BMD) T-score, automated (left)                                  | -0.0167 | 0.0356 | -0.4676 | 0.6401 |
| UKB   | Cancer code, self-reported: uterine/endometrial cancer                                     | -0.0958 | 0.2059 | -0.4653 | 0.6417 |
| LDHUB | Total lipids in medium LDL                                                                 | 0.0666  | 0.1432 | 0.465   | 0.6419 |
| UKB   | Chest pain felt outside physical activity                                                  | 0.953   | 2.0554 | 0.4637  | 0.6429 |
| UKB   | Non-cancer illness code, self-reported: muscle or soft tissue injuries                     | 0.0758  | 0.1635 | 0.4632  | 0.6432 |
| UKB   | Diagnoses - main ICD10: A09 Diarrhoea and gastro-enteritis of presumed infectious origin   | -0.1307 | 0.2828 | -0.462  | 0.6441 |
| UKB   | Diagnoses - main ICD10: S42 Fracture of shoulder and upper arm                             | -0.1471 | 0.3204 | -0.4593 | 0.646  |
| UKB   | Non-cancer illness code, self-reported: fracture forearm / wrist                           | -0.584  | 1.2716 | -0.4592 | 0.6461 |
| UKB   | Treatment/medication code: liquifilm tears 1.4% eye drops                                  | -0.134  | 0.2922 | -0.4587 | 0.6465 |
| UKB   | Underlying (primary) cause of death: ICD10: C53.9 Cervix uteri, unspecified                | 0.258   | 0.5632 | 0.4582  | 0.6468 |
| UKB   | Number of stillbirths                                                                      | 0.8292  | 1.8155 | 0.4567  | 0.6479 |
| UKB   | Treatment/medication code: canesten 1% cream                                               | 0.0667  | 0.1463 | 0.4561  | 0.6483 |
| LDHUB | Mean Accumbens                                                                             | 0.0602  | 0.1328 | 0.4532  | 0.6504 |
| UKB   | Diagnoses - main ICD10: N84 Polyp of female genital tract                                  | 0.049   | 0.1082 | 0.4525  | 0.6509 |
| UKB   | Diagnoses - main ICD10: K01 Embedded and impacted teeth                                    | -0.0875 | 0.1934 | -0.4523 | 0.651  |
| UKB   | Non-cancer illness code, self-reported: stomach disorder                                   | 0.0862  | 0.1912 | 0.451   | 0.652  |
| UKB   | Underlying (primary) cause of death: ICD10: J43.9 Emphysema, unspecified                   | -0.4297 | 0.959  | -0.448  | 0.6541 |
| UKB   | Non-cancer illness code, self-reported: pancreatitis                                       | -0.0753 | 0.1682 | -0.4478 | 0.6543 |
| UKB   | Non-cancer illness code, self-reported: leg claudication/ intermittent claudication        | 0.0642  | 0.144  | 0.4458  | 0.6557 |
| LDHUB | Sitting height ratio                                                                       | 0.0315  | 0.0706 | 0.4459  | 0.6557 |
| UKB   | Diagnoses - main ICD10: K51 Ulcerative colitis                                             | -0.0498 | 0.1118 | -0.4455 | 0.656  |
| UKB   | Underlying (primary) cause of death: ICD10: C32.9 Larynx, unspecified                      | -0.2202 | 0.4962 | -0.4438 | 0.6572 |
| UKB   | Treatment/medication code: movelat cream                                                   | 0.778   | 1.7554 | 0.4432  | 0.6576 |
| UKB   | Treatment/medication code: tridestra tablet                                                | 0.1165  | 0.2631 | 0.4428  | 0.6579 |
| UKB   | Diagnoses - main ICD10: M45 Ankylosing spondylitis                                         | 0.0646  | 0.1461 | 0.4425  | 0.6581 |
| UKB   | Diagnoses - main ICD10: D86 Sarcoidosis                                                    | 0.0658  | 0.1489 | 0.442   | 0.6585 |
| UKB   | Non-cancer illness code, self-reported: allergy to house dust mite                         | -0.1998 | 0.4552 | -0.4389 | 0.6607 |
| UKB   | Diagnoses - main ICD10: J84 Other interstitial pulmonary diseases                          | 0.2252  | 0.5136 | 0.4385  | 0.661  |
| UKB   | Treatment/medication code: buccastem 3mg tablet                                            | 0.3604  | 0.8245 | 0.4372  | 0.662  |
| UKB   | Treatment/medication code: solifenacin                                                     | 0.0595  | 0.1373 | 0.4332  | 0.6649 |
| UKB   | Diagnoses - main ICD10: S12 Fracture of neck                                               | 0.2102  | 0.4862 | 0.4323  | 0.6655 |
| UKB   | Non-cancer illness code, self-reported: food intolerance                                   | 0.5684  | 1.3168 | 0.4317  | 0.666  |
| LDHUB | Total lipids in small LDL                                                                  | 0.0569  | 0.1325 | 0.4292  | 0.6678 |
| UKB   | Non-cancer illness code, self-reported: svt / supraventricular tachycardia                 | 0.1522  | 0.3564 | 0.4269  | 0.6695 |
| UKB   | Underlying (primary) cause of death: ICD10: G90.3 Multisystem degeneration                 | -0.0498 | 0.1173 | -0.4247 | 0.671  |
| UKB   | Treatment/medication code: tamsulosin                                                      | 0.084   | 0.1981 | 0.424   | 0.6715 |
| UKB   | Cancer code, self-reported: chronic myeloid                                                | 0.0896  | 0.2122 | 0.4221  | 0.6729 |
| UKB   | Treatment/medication code: azathioprine                                                    | -0.2181 | 0.5168 | -0.4221 | 0.673  |
| UKB   | Non-cancer illness code, self-reported: pyloric stenosis                                   | 0.0464  | 0.11   | 0.422   | 0.6731 |
| UKB   | Treatment/medication code: adcal-d3 1.5g/10micrograms chewable tablet                      | 0.0485  | 0.1161 | 0.4178  | 0.6761 |
| UKB   | Pulse wave reflection index                                                                | 0.0273  | 0.0653 | 0.4176  | 0.6762 |
| LDHUB | Total cholesterol in LDL                                                                   | 0.0623  | 0.1493 | 0.4176  | 0.6762 |
| UKB   | Treatment/medication code: lyrica 25mg capsule                                             | 0.4785  | 1.1499 | 0.4161  | 0.6773 |
| UKB   | Diagnoses - main ICD10: O00 Ectopic pregnancy                                              | -0.1102 | 0.2647 | -0.4162 | 0.6773 |
| UKB   | Diagnoses - main ICD10: N41 Inflammatory diseases of prostate                              | 0.0882  | 0.2126 | 0.4148  | 0.6783 |
| UKB   | Diagnoses - main ICD10: M62 Other disorders of muscle                                      | -0.156  | 0.3771 | -0.4137 | 0.6791 |
| UKB   | Diagnoses - main ICD10: Z12 Special screening examination for neoplasms                    | 0.0647  | 0.1568 | 0.4125  | 0.68   |
| UKB   | Diagnoses - main ICD10: O32 Maternal care for known or suspected malpresentation of foetu  | 0.1204  | 0.292  | 0.4123  | 0.6801 |
| UKB   | Diagnoses - main ICD10: L43 Lichen planus                                                  | -0.0808 | 0.1975 | -0.4094 | 0.6822 |
| UKB   | Treatment/medication code: aminophylline                                                   | -0.0448 | 0.1096 | -0.4087 | 0.6828 |
| UKB   | Underlying (primary) cause of death: ICD10: C20 Malignant neoplasm of rectum               | -0.1785 | 0.4373 | -0.4081 | 0.6832 |
| UKB   | Treatment/medication code: co-amoxiclav                                                    | 0.0641  | 0.1575 | 0.4071  | 0.6839 |
| UKB   | Diagnoses - main ICD10: C20 Malignant neoplasm of rectum                                   | -0.1483 | 0.3646 | -0.4069 | 0.6841 |
| UKB   | Treatment/medication code: zirtek 10mg tablet                                              | -0.1636 | 0.4025 | -0.4064 | 0.6844 |
| UKB   | Underlying (primary) cause of death: ICD10: C91.0 Acute lymphoblastic leukaemia            | 0.0834  | 0.2053 | 0.4061  | 0.6847 |
| UKB   | Treatment/medication code: coversyl plus 4mg/1.25mg tablet                                 | 0.0947  | 0.2334 | 0.4055  | 0.6851 |
| UKB   | Underlying (primary) cause of death: ICD10: C55 Malignant neoplasm of uterus, part unspeci | -0.3268 | 0.8081 | -0.4045 | 0.6859 |
| UKB   | Treatment/medication code: alfacalcidol                                                    | 0.0793  | 0.1965 | 0.4039  | 0.6863 |
| UKB   | Treatment/medication code: sandrena 0.5mg gel                                              | 0.818   | 2.0251 | 0.4039  | 0.6863 |
| LDHUB | Crohns disease                                                                             | 0.0243  | 0.0602 | 0.4039  | 0.6863 |



|       |                                                                                              |         |        |         |        |
|-------|----------------------------------------------------------------------------------------------|---------|--------|---------|--------|
| UKB   | Non-cancer illness code, self-reported: fibrosing alveolitis/unspecified alveolitis          | 0.2035  | 0.5068 | 0.4016  | 0.688  |
| UKB   | Diagnoses - main ICD10: N34 Urethritis and urethral syndrome                                 | 0.0874  | 0.2208 | 0.396   | 0.6921 |
| UKB   | Treatment/medication code: norethisterone                                                    | 0.5766  | 1.4576 | 0.3955  | 0.6924 |
| UKB   | Diagnoses - main ICD10: S30 Superficial injury of abdomen, lower back and pelvis             | -0.0927 | 0.2358 | -0.3932 | 0.6942 |
| UKB   | Diagnoses - main ICD10: O47 False labour                                                     | 0.0744  | 0.1907 | 0.3899  | 0.6966 |
| UKB   | Treatment/medication code: brimonidine tartrate                                              | -0.0662 | 0.1699 | -0.3894 | 0.697  |
| UKB   | Underlying (primary) cause of death: ICD10: C90.0 Multiple myeloma                           | 0.1125  | 0.2899 | 0.3879  | 0.6981 |
| UKB   | Treatment/medication code: bezafibrate                                                       | -0.1881 | 0.4895 | -0.3844 | 0.7007 |
| UKB   | Diagnoses - main ICD10: K50 Crohn's disease [regional enteritis]                             | -0.0452 | 0.1184 | -0.3819 | 0.7025 |
| UKB   | Length of longest manic/irritable episode                                                    | -0.0929 | 0.2439 | -0.3808 | 0.7033 |
| UKB   | Treatment/medication code: viagra 50mg tablet                                                | 0.0851  | 0.2234 | 0.3807  | 0.7034 |
| LDHUB | Free cholesterol                                                                             | -0.0669 | 0.1759 | -0.3801 | 0.7039 |
| LDHUB | Cholesterol esters in large LDL                                                              | 0.0562  | 0.1479 | 0.3798  | 0.7041 |
| UKB   | Non-cancer illness code, self-reported: heart failure/pulmonary odema                        | 0.0663  | 0.1753 | 0.3781  | 0.7054 |
| UKB   | Non-cancer illness code, self-reported: gastritis/gastric erosions                           | 0.8725  | 2.3088 | 0.3779  | 0.7055 |
| UKB   | Mineral and other dietary supplements: Selenium                                              | 0.0357  | 0.095  | 0.3763  | 0.7067 |
| UKB   | Diagnoses - main ICD10: Z71 Persons encountering health services for other counselling and i | 0.0988  | 0.2628 | 0.3758  | 0.7071 |
| LDHUB | Concentration of small LDL particles                                                         | 0.0461  | 0.1238 | 0.3725  | 0.7095 |
| UKB   | Treatment/medication code: opticrom allergy eye drops                                        | 0.3498  | 0.9408 | 0.3718  | 0.71   |
| UKB   | Diagnoses - main ICD10: G62 Other polyneuropathies                                           | 0.0807  | 0.2176 | 0.371   | 0.7106 |
| UKB   | Non-cancer illness code, self-reported: vaginal prolapse/uterine prolapse                    | -0.0423 | 0.1149 | -0.3681 | 0.7128 |
| UKB   | Cancer code, self-reported: sarcoma/fibrosarcoma                                             | 0.0866  | 0.2354 | 0.3678  | 0.713  |
| LDHUB | Apolipoprotein B                                                                             | -0.0423 | 0.1178 | -0.3588 | 0.7198 |
| UKB   | Diagnoses - main ICD10: H80 Otosclerosis                                                     | -0.0483 | 0.1346 | -0.3586 | 0.7199 |
| UKB   | Treatment/medication code: calcium+ergocalciferol tablet                                     | -0.0895 | 0.2499 | -0.3582 | 0.7202 |
| UKB   | Treatment/medication code: travatan 40micrograms/ml eye drops                                | -0.0611 | 0.1713 | -0.3566 | 0.7214 |
| UKB   | Impedance of leg (left)                                                                      | -0.0102 | 0.0287 | -0.356  | 0.7218 |
| UKB   | Diagnoses - main ICD10: K65 Peritonitis                                                      | -0.1314 | 0.369  | -0.3561 | 0.7218 |
| UKB   | Cancer code, self-reported: malignant melanoma                                               | 0.0399  | 0.1125 | 0.3551  | 0.7225 |
| UKB   | Non-cancer illness code, self-reported: anal problem                                         | 0.0956  | 0.2692 | 0.3551  | 0.7225 |
| UKB   | Diagnoses - main ICD10: D05 Carcinoma in situ of breast                                      | -0.2359 | 0.6653 | -0.3546 | 0.7229 |
| UKB   | Cancer code, self-reported: chronic lymphocytic                                              | -0.0832 | 0.2354 | -0.3534 | 0.7238 |
| UKB   | Treatment/medication code: hepacon b12 1mg/1ml injection                                     | 0.0777  | 0.2211 | 0.3512  | 0.7255 |
| UKB   | Treatment/medication code: cosopt 2%/0.5% eye drops                                          | -0.0478 | 0.1364 | -0.3505 | 0.7259 |
| LDHUB | Total lipids in large LDL                                                                    | 0.0517  | 0.1479 | 0.3496  | 0.7266 |
| UKB   | Non-cancer illness code, self-reported: ectopic pregnancy                                    | 0.061   | 0.1749 | 0.3488  | 0.7272 |
| UKB   | Diagnoses - main ICD10: K86 Other diseases of pancreas                                       | 0.0463  | 0.1333 | 0.3471  | 0.7285 |
| UKB   | Treatment/medication code: sodium valproate                                                  | 0.3716  | 1.0891 | 0.3412  | 0.7329 |
| UKB   | Diagnoses - main ICD10: H40 Glaucoma                                                         | 0.0614  | 0.1804 | 0.3406  | 0.7334 |
| LDHUB | Phospholipids in medium VLDL                                                                 | -0.0263 | 0.0773 | -0.3405 | 0.7334 |
| UKB   | Treatment/medication code: epilim 100mg crushable tablet                                     | 0.0576  | 0.1694 | 0.3399  | 0.7339 |
| UKB   | Diagnoses - main ICD10: Z08 Follow-up examination after treatment for malignant neoplasm     | 0.1565  | 0.4618 | 0.3388  | 0.7348 |
| UKB   | Treatment/medication code: garlic product                                                    | 0.0519  | 0.1538 | 0.3375  | 0.7358 |
| UKB   | Treatment/medication code: tylex capsule                                                     | 0.3913  | 1.1625 | 0.3366  | 0.7364 |
| LDHUB | Concentration of large LDL particles                                                         | 0.049   | 0.1456 | 0.3365  | 0.7365 |
| LDHUB | Total cholesterol in HDL                                                                     | 0.0388  | 0.1162 | 0.3337  | 0.7386 |
| UKB   | Diagnoses - main ICD10: O16 Unspecified maternal hypertension                                | 0.1293  | 0.3887 | 0.3328  | 0.7393 |
| UKB   | Eye problems/disorders: Other serious eye condition                                          | -0.063  | 0.1895 | -0.3325 | 0.7395 |
| UKB   | Treatment/medication code: terbinafine                                                       | 0.0488  | 0.147  | 0.3317  | 0.7401 |
| UKB   | Treatment/medication code: betahistine                                                       | 0.0855  | 0.2581 | 0.3311  | 0.7405 |
| UKB   | Diagnoses - main ICD10: H57 Other disorders of eye and adnexa                                | -0.0734 | 0.2219 | -0.3306 | 0.7409 |
| LDHUB | Free cholesterol in small VLDL                                                               | -0.03   | 0.0909 | -0.3302 | 0.7413 |
| UKB   | Treatment/medication code: doxycycline                                                       | 0.2728  | 0.8342 | 0.327   | 0.7436 |
| UKB   | Fracture resulting from simple fall                                                          | -0.0342 | 0.1046 | -0.327  | 0.7437 |
| UKB   | Treatment/medication code: adalat 5mg capsule                                                | -0.0822 | 0.2527 | -0.3253 | 0.745  |
| LDHUB | Neo-conscientiousness                                                                        | -0.0398 | 0.1223 | -0.325  | 0.7452 |
| LDHUB | LDL cholesterol                                                                              | -0.0169 | 0.0521 | -0.3245 | 0.7456 |
| UKB   | Diagnoses - main ICD10: M21 Other acquired deformities of limbs                              | -0.807  | 2.492  | -0.3239 | 0.7461 |
| LDHUB | Inflammatory Bowel Disease (Euro)                                                            | -0.0185 | 0.0574 | -0.3217 | 0.7477 |
| UKB   | Treatment/medication code: arcoxia 90mg tablet                                               | -0.2014 | 0.6301 | -0.3196 | 0.7492 |
| UKB   | Diagnoses - main ICD10: T86 Failure and rejection of transplanted organs and tissues         | 0.0393  | 0.1236 | 0.3183  | 0.7503 |
| UKB   | Potassium in urine                                                                           | 0.0136  | 0.043  | 0.3168  | 0.7514 |
| UKB   | Reason former drinker stopped drinking alcohol: Doctor's advice                              | -0.0595 | 0.1881 | -0.3164 | 0.7517 |

|       |                                                                                             |         |        |         |        |
|-------|---------------------------------------------------------------------------------------------|---------|--------|---------|--------|
| UKB   | Diagnoses - main ICD10: N05 Unspecified nephritic syndrome                                  | -0.0784 | 0.251  | -0.3125 | 0.7546 |
| UKB   | Non-cancer illness code, self-reported: fracture toe                                        | 0.1817  | 0.5821 | 0.3121  | 0.755  |
| UKB   | Treatment/medication code: bisoprolol                                                       | 0.0291  | 0.094  | 0.3097  | 0.7568 |
| LDHUB | Apolipoprotein A-I                                                                          | -0.0416 | 0.1345 | -0.3095 | 0.757  |
| UKB   | Non-cancer illness code, self-reported: renal failure not requiring dialysis                | 0.0901  | 0.2915 | 0.3089  | 0.7574 |
| UKB   | Diagnoses - main ICD10: J86 Pyothorax                                                       | -0.0571 | 0.1857 | -0.3074 | 0.7585 |
| UKB   | Treatment/medication code: olmetec 10mg tablet                                              | -0.0719 | 0.2358 | -0.3048 | 0.7605 |
| UKB   | Treatment/medication code: senna product                                                    | -0.0681 | 0.2236 | -0.3047 | 0.7606 |
| UKB   | Treatment/medication code: pilocarpine                                                      | 0.0319  | 0.1048 | 0.3045  | 0.7607 |
| UKB   | Non-cancer illness code, self-reported: ulcerative colitis                                  | -0.0357 | 0.1178 | -0.3028 | 0.7621 |
| UKB   | Treatment/medication code: mesalazine                                                       | -0.0832 | 0.2756 | -0.3019 | 0.7627 |
| UKB   | Treatment/medication code: quetiapine                                                       | 0.0815  | 0.2703 | 0.3017  | 0.7629 |
| UKB   | Diagnoses - main ICD10: L05 Pilonidal cyst                                                  | 0.0459  | 0.1522 | 0.3015  | 0.763  |
| UKB   | Treatment/medication code: metoclopramide                                                   | 0.0474  | 0.1575 | 0.3007  | 0.7636 |
| UKB   | Diagnoses - main ICD10: O14 Gestational [pregnancy-induced] hypertension with significant p | -0.2207 | 0.7385 | -0.2988 | 0.7651 |
| UKB   | Treatment/medication code: chlorpheniramine                                                 | 0.0818  | 0.2739 | 0.2986  | 0.7652 |
| UKB   | Fractured bone site(s): Arm                                                                 | -0.0362 | 0.1212 | -0.2982 | 0.7655 |
| UKB   | Non-cancer illness code, self-reported: blistering/desquamating skin disorder               | 0.042   | 0.142  | 0.2959  | 0.7673 |
| UKB   | Diagnoses - main ICD10: R20 Disturbances of skin sensation                                  | 0.6119  | 2.0683 | 0.2958  | 0.7674 |
| UKB   | Underlying (primary) cause of death: ICD10: C16.0 Cardia                                    | 0.0532  | 0.1826 | 0.2914  | 0.7707 |
| UKB   | Treatment/medication code: brinzolamide                                                     | -0.0793 | 0.2731 | -0.2904 | 0.7715 |
| UKB   | Treatment/medication code: omega-3/fish oil supplement                                      | 0.0279  | 0.0966 | 0.2891  | 0.7725 |
| UKB   | Diagnoses - main ICD10: I48 Atrial fibrillation and flutter                                 | 0.0204  | 0.0707 | 0.2891  | 0.7725 |
| UKB   | Non-cancer illness code, self-reported: gestational diabetes                                | -0.1384 | 0.4798 | -0.2885 | 0.773  |
| UKB   | Frequency of other exercises in last 4 weeks                                                | 0.0251  | 0.087  | 0.2881  | 0.7733 |
| UKB   | Diagnoses - main ICD10: J43 Emphysema                                                       | 0.0649  | 0.2256 | 0.2877  | 0.7736 |
| UKB   | Diagnoses - main ICD10: D69 Purpura and other haemorrhagic conditions                       | 0.0556  | 0.1937 | 0.2871  | 0.774  |
| UKB   | Treatment/medication code: premique 0.625mg/5mg tablet                                      | -0.0414 | 0.1446 | -0.2864 | 0.7746 |
| UKB   | Treatment/medication code: zinc product                                                     | 0.0711  | 0.2522 | 0.2819  | 0.778  |
| UKB   | Treatment/medication code: testogel 50mg gel 5g sachet                                      | -0.0323 | 0.1147 | -0.2816 | 0.7782 |
| UKB   | Diagnoses - main ICD10: Z36 Antenatal screening                                             | 0.028   | 0.1    | 0.2795  | 0.7799 |
| UKB   | Mother still alive                                                                          | 0.0379  | 0.1358 | 0.279   | 0.7802 |
| UKB   | Treatment/medication code: daktacort cream                                                  | -0.0492 | 0.177  | -0.2781 | 0.7809 |
| UKB   | Diagnoses - main ICD10: I61 Intracerebral haemorrhage                                       | -0.103  | 0.371  | -0.2776 | 0.7813 |
| UKB   | Treatment/medication code: arthrotec 50 tablet                                              | 0.0779  | 0.2806 | 0.2774  | 0.7814 |
| UKB   | Reported occurrences of cancer                                                              | 0.052   | 0.1875 | 0.2774  | 0.7815 |
| LDHUB | Mono-unsaturated fatty acids                                                                | 0.031   | 0.1124 | 0.2759  | 0.7826 |
| UKB   | Leg pain when walking ever disappears while walking                                         | -0.0325 | 0.1179 | -0.2757 | 0.7828 |
| LDHUB | Glutamine                                                                                   | 0.0288  | 0.1048 | 0.2745  | 0.7837 |
| UKB   | Treatment/medication code: cerazette 75micrograms tablet                                    | 0.2038  | 0.7452 | 0.2735  | 0.7845 |
| UKB   | Diagnoses - main ICD10: K90 Intestinal malabsorption                                        | -0.0293 | 0.109  | -0.2688 | 0.7881 |
| UKB   | Non-cancer illness code, self-reported: bowel / intestinal obstruction                      | -0.2236 | 0.8373 | -0.267  | 0.7895 |
| UKB   | Non-cancer illness code, self-reported: arthritis (nos)                                     | 0.0416  | 0.1566 | 0.2658  | 0.7904 |
| UKB   | Diagnoses - main ICD10: Q38 Other congenital malformations of tongue, mouth and pharynx     | 0.0585  | 0.22   | 0.2658  | 0.7904 |
| UKB   | Diagnoses - main ICD10: M53 Other dorsopathies, not elsewhere classified                    | -0.0406 | 0.153  | -0.2653 | 0.7908 |
| UKB   | Underlying (primary) cause of death: ICD10: F03 Unspecified dementia                        | -0.3649 | 1.3852 | -0.2634 | 0.7922 |
| UKB   | Non-cancer illness code, self-reported: benign breast lump                                  | 0.0433  | 0.1647 | 0.2631  | 0.7925 |
| LDHUB | Triglycerides in small VLDL                                                                 | -0.0203 | 0.0778 | -0.2609 | 0.7942 |
| UKB   | Non-cancer illness code, self-reported: cardiomyopathy                                      | -0.0429 | 0.1648 | -0.2601 | 0.7948 |
| LDHUB | Ratio of bisallylic groups to total fatty acids                                             | -0.0182 | 0.0699 | -0.2597 | 0.7951 |
| UKB   | Diagnoses - main ICD10: I42 Cardiomyopathy                                                  | 0.0313  | 0.1213 | 0.2583  | 0.7962 |
| LDHUB | Cholesterol esters in medium HDL                                                            | 0.0411  | 0.1599 | 0.257   | 0.7972 |
| UKB   | Diagnoses - main ICD10: C61 Malignant neoplasm of prostate                                  | 0.0334  | 0.1308 | 0.2556  | 0.7982 |
| UKB   | Underlying (primary) cause of death: ICD10: C78.6 Secondary malignant neoplasm of retrope   | -0.0495 | 0.1947 | -0.2542 | 0.7994 |
| UKB   | Treatment/medication code: telfast 30 tablet                                                | 0.0826  | 0.3261 | 0.2532  | 0.8001 |
| LDHUB | Phospholipids in IDL                                                                        | 0.0364  | 0.1444 | 0.2521  | 0.801  |
| UKB   | Diagnoses - main ICD10: N83 Noninflammatory disorders of ovary, Fallopian tube and broad l  | 0.6712  | 2.6765 | 0.2508  | 0.802  |
| UKB   | Non-cancer illness code, self-reported: atrial fibrillation                                 | 0.0238  | 0.0961 | 0.2473  | 0.8047 |
| UKB   | Diagnoses - main ICD10: N18 Chronic renal failure                                           | 0.0783  | 0.317  | 0.247   | 0.8049 |
| UKB   | Diagnoses - main ICD10: K91 Postprocedural disorders of digestive system, not elsewhere cla | -0.0368 | 0.1491 | -0.2466 | 0.8052 |
| UKB   | Illnesses of siblings: Breast cancer                                                        | 0.035   | 0.1434 | 0.2443  | 0.807  |
| UKB   | Treatment/medication code: cozaar-comp 50mg/12.5mg tablet                                   | -0.0433 | 0.178  | -0.2435 | 0.8076 |
| LDHUB | Phospholipids in medium HDL                                                                 | 0.0303  | 0.1248 | 0.2427  | 0.8082 |

|       |                                                                                                |         |        |         |        |
|-------|------------------------------------------------------------------------------------------------|---------|--------|---------|--------|
| LDHUB | Cholesterol esters in large HDL                                                                | -0.0233 | 0.0959 | -0.2425 | 0.8084 |
| UKB   | Underlying (primary) cause of death: ICD10: C45.9 Mesothelioma, unspecified                    | 0.0688  | 0.2842 | 0.2421  | 0.8087 |
| UKB   | Underlying (primary) cause of death: ICD10: K74.6 Other and unspecified cirrhosis of liver     | -0.0581 | 0.2425 | -0.2398 | 0.8105 |
| LDHUB | Urate                                                                                          | 0.0086  | 0.0357 | 0.2395  | 0.8107 |
| UKB   | Treatment/medication code: diovan 40mg capsule                                                 | -0.0452 | 0.1888 | -0.2394 | 0.8108 |
| LDHUB | Omega-3 fatty acids                                                                            | 0.0237  | 0.0992 | 0.2387  | 0.8114 |
| UKB   | Treatment/medication code: phenoxymethylpenicillin                                             | -0.0472 | 0.198  | -0.2385 | 0.8115 |
| UKB   | Diagnoses - main ICD10: I30 Acute pericarditis                                                 | -0.0294 | 0.1241 | -0.2374 | 0.8124 |
| UKB   | Diagnoses - main ICD10: K42 Umbilical hernia                                                   | 0.0296  | 0.125  | 0.2368  | 0.8128 |
| UKB   | Treatment/medication code: rhumalgan 25mg e/c tablet                                           | 0.0446  | 0.1888 | 0.2364  | 0.8131 |
| UKB   | Treatment/medication code: insulin product                                                     | 0.0191  | 0.0812 | 0.2351  | 0.8141 |
| UKB   | Treatment/medication code: captopril                                                           | 0.0662  | 0.2831 | 0.2339  | 0.8151 |
| UKB   | Diagnoses - main ICD10: N32 Other disorders of bladder                                         | 0.0249  | 0.1064 | 0.2339  | 0.8151 |
| UKB   | Diagnoses - main ICD10: H11 Other disorders of conjunctiva                                     | 0.0409  | 0.1752 | 0.2334  | 0.8155 |
| UKB   | Underlying (primary) cause of death: ICD10: K83.0 Cholangitis                                  | 0.052   | 0.2271 | 0.2292  | 0.8187 |
| UKB   | Treatment/medication code: nifedipine                                                          | -0.0378 | 0.1653 | -0.2288 | 0.819  |
| UKB   | Underlying (primary) cause of death: ICD10: X78.0 Home                                         | -0.0637 | 0.2792 | -0.2283 | 0.8194 |
| UKB   | Treatment/medication code: progynova 1mg tablet                                                | -0.0479 | 0.2104 | -0.2278 | 0.8198 |
| UKB   | Treatment/medication code: dermivate cream                                                     | 0.0576  | 0.2539 | 0.2269  | 0.8205 |
| UKB   | Treatment/medication code: phyllocontin continus 225mg m/r tablet                              | 0.1012  | 0.4479 | 0.2258  | 0.8213 |
| UKB   | Reason for glasses/contact lenses: For just reading/near work as you are getting older (called | -0.0388 | 0.1721 | -0.2253 | 0.8218 |
| UKB   | Underlying (primary) cause of death: ICD10: D43.2 Brain, unspecified                           | -0.4314 | 1.9405 | -0.2223 | 0.8241 |
| UKB   | Diagnoses - main ICD10: N19 Unspecified renal failure                                          | 0.0366  | 0.1659 | 0.2204  | 0.8256 |
| UKB   | Non-cancer illness code, self-reported: retinal artery/vein occlusion                          | -0.0871 | 0.3961 | -0.2199 | 0.826  |
| UKB   | Diagnoses - main ICD10: R14 Flatulence and related conditions                                  | 0.0295  | 0.1348 | 0.2186  | 0.8269 |
| UKB   | Treatment/medication code: cymalon cranberry 1.5g/5ml liquid                                   | -0.0494 | 0.2273 | -0.2174 | 0.8279 |
| UKB   | Diagnoses - main ICD10: H59 Postprocedural disorders of eye and adnexa, not elsewhere clas     | -0.2737 | 1.2642 | -0.2165 | 0.8286 |
| UKB   | Treatment/medication code: moxonidine                                                          | 0.1823  | 0.8437 | 0.2161  | 0.8289 |
| LDHUB | Total lipids in medium VLDL                                                                    | -0.0166 | 0.0767 | -0.2158 | 0.8292 |
| UKB   | Treatment/medication code: xalacom 0.005%/0.5% eye drops                                       | 0.0245  | 0.1139 | 0.2152  | 0.8296 |
| UKB   | Treatment/medication code: metronidazole                                                       | -0.0544 | 0.2538 | -0.2145 | 0.8302 |
| UKB   | Diagnoses - main ICD10: H05 Disorders of orbit                                                 | -0.0346 | 0.1613 | -0.2143 | 0.8303 |
| UKB   | Diagnoses - main ICD10: N47 Redundant prepuce, phimosis and paraphimosis                       | 0.089   | 0.4153 | 0.2143  | 0.8303 |
| UKB   | Non-cancer illness code, self-reported: glaucoma                                               | -0.0167 | 0.0782 | -0.2131 | 0.8313 |
| UKB   | Diagnoses - main ICD10: S06 Intracranial injury                                                | 0.2594  | 1.2242 | 0.2119  | 0.8322 |
| LDHUB | Concentration of large HDL particles                                                           | -0.0194 | 0.0928 | -0.2092 | 0.8343 |
| UKB   | Diagnoses - main ICD10: D07 Carcinoma in situ of other and unspecified genital organs          | 0.1049  | 0.5028 | 0.2087  | 0.8347 |
| UKB   | Diagnoses - main ICD10: R30 Pain associated with micturition                                   | 0.0323  | 0.1558 | 0.2073  | 0.8358 |
| UKB   | Diagnoses - main ICD10: R26 Abnormalities of gait and mobility                                 | 0.0306  | 0.1501 | 0.2042  | 0.8382 |
| UKB   | Medication for cholesterol, blood pressure, diabetes, or take exogenous hormones: Insulin      | -0.0235 | 0.1168 | -0.2015 | 0.8403 |
| LDHUB | Total lipids in medium HDL                                                                     | 0.0271  | 0.1346 | 0.2011  | 0.8406 |
| UKB   | Treatment/medication code: sumatriptan                                                         | 0.0254  | 0.1274 | 0.1992  | 0.8421 |
| UKB   | Treatment/medication code: adcal 600mg chewable tablet                                         | -0.0481 | 0.2418 | -0.199  | 0.8423 |
| UKB   | Treatment/medication code: priadel 200mg m/r tablet                                            | 0.0341  | 0.173  | 0.1971  | 0.8437 |
| UKB   | Treatment/medication code: selegiline                                                          | 0.0447  | 0.2292 | 0.1952  | 0.8452 |
| UKB   | Cancer code, self-reported: basal cell carcinoma                                               | 0.0152  | 0.08   | 0.19    | 0.8493 |
| UKB   | Diagnoses - main ICD10: M46 Other inflammatory spondylopathies                                 | -0.0246 | 0.1297 | -0.1897 | 0.8495 |
| UKB   | Illnesses of father: Stroke                                                                    | -0.0257 | 0.136  | -0.1889 | 0.8502 |
| UKB   | Diagnoses - main ICD10: S72 Fracture of femur                                                  | -0.0304 | 0.1629 | -0.1864 | 0.8522 |
| LDHUB | Triglycerides in IDL                                                                           | -0.0187 | 0.1009 | -0.1853 | 0.853  |
| UKB   | Treatment/medication code: epaderm ointment                                                    | 0.0279  | 0.1508 | 0.1847  | 0.8534 |
| UKB   | Illnesses of father: Diabetes                                                                  | -0.0124 | 0.0673 | -0.1842 | 0.8538 |
| UKB   | Age at death                                                                                   | 0.134   | 0.7286 | 0.1839  | 0.8541 |
| UKB   | Treatment/medication code: lacidipine                                                          | -0.0453 | 0.2467 | -0.1836 | 0.8544 |
| LDHUB | Total cholesterol in large HDL                                                                 | 0.0189  | 0.1035 | 0.1826  | 0.8551 |
| UKB   | Treatment/medication code: carbomers                                                           | -0.0686 | 0.38   | -0.1805 | 0.8568 |
| LDHUB | Total lipids in large HDL                                                                      | -0.0167 | 0.093  | -0.1798 | 0.8573 |
| UKB   | Treatment/medication code: budesonide                                                          | 0.0305  | 0.1717 | 0.1777  | 0.8589 |
| UKB   | Treatment/medication code: pizotifen                                                           | 0.4661  | 2.6322 | 0.1771  | 0.8594 |
| LDHUB | Concentration of medium HDL particles                                                          | 0.0222  | 0.1273 | 0.174   | 0.8619 |
| LDHUB | Free cholesterol in IDL                                                                        | 0.0209  | 0.1219 | 0.1714  | 0.8639 |
| UKB   | Treatment/medication code: budesonide+formoterol                                               | 0.6199  | 3.6257 | 0.171   | 0.8642 |
| UKB   | Non-cancer illness code, self-reported: spinal cord disorder                                   | 0.0317  | 0.1879 | 0.1685  | 0.8662 |

|       |                                                                                           |         |        |         |        |
|-------|-------------------------------------------------------------------------------------------|---------|--------|---------|--------|
| UKB   | Treatment/medication code: risedronate sodium                                             | -0.0282 | 0.1721 | -0.1641 | 0.8696 |
| UKB   | Treatment/medication code: capasal shampoo                                                | -0.0191 | 0.1176 | -0.1623 | 0.8711 |
| UKB   | Treatment/medication code: nitrazepam                                                     | 0.0238  | 0.1475 | 0.1611  | 0.872  |
| UKB   | Diagnoses - main ICD10: M06 Other rheumatoid arthritis                                    | 0.022   | 0.1376 | 0.1601  | 0.8728 |
| LDHUB | Free cholesterol in large HDL                                                             | 0.016   | 0.1002 | 0.1595  | 0.8733 |
| UKB   | Diagnoses - main ICD10: K08 Other disorders of teeth and supporting structures            | 0.0233  | 0.1481 | 0.1571  | 0.8752 |
| UKB   | Cancer code, self-reported: oesophageal cancer                                            | -0.0282 | 0.1806 | -0.1564 | 0.8757 |
| UKB   | Diagnoses - main ICD10: C22 Malignant neoplasm of liver and intrahepatic bile ducts       | 0.0317  | 0.2033 | 0.1559  | 0.8761 |
| UKB   | Diagnoses - main ICD10: S20 Superficial injury of thorax                                  | 0.0404  | 0.2597 | 0.1556  | 0.8763 |
| LDHUB | Triglycerides in medium VLDL                                                              | -0.0128 | 0.0824 | -0.1553 | 0.8766 |
| LDHUB | Age at Menarche                                                                           | 0.0059  | 0.0383 | 0.1549  | 0.8769 |
| UKB   | Diagnoses - main ICD10: K41 Femoral hernia                                                | 0.0535  | 0.3459 | 0.1548  | 0.877  |
| UKB   | Underlying (primary) cause of death: ICD10: G20 Parkinson's disease                       | 0.0461  | 0.2987 | 0.1543  | 0.8774 |
| UKB   | Diagnoses - main ICD10: D03 Melanoma in situ                                              | -0.1213 | 0.7937 | -0.1528 | 0.8786 |
| LDHUB | Alzheimers disease                                                                        | 0.014   | 0.0932 | 0.1501  | 0.8807 |
| UKB   | Diagnoses - main ICD10: N73 Other female pelvic inflammatory diseases                     | 0.6002  | 4.0024 | 0.15    | 0.8808 |
| UKB   | Treatment/medication code: adizem-xl plus m/r capsule                                     | 0.2724  | 1.8331 | 0.1486  | 0.8819 |
| UKB   | Treatment/medication code: dovonex 50micrograms/g cream                                   | -0.0261 | 0.1763 | -0.1482 | 0.8822 |
| LDHUB | Total lipids in very small VLDL                                                           | -0.0152 | 0.1037 | -0.1461 | 0.8839 |
| UKB   | Average monthly beer plus cider intake                                                    | 0.0221  | 0.157  | 0.141   | 0.8879 |
| UKB   | Treatment/medication code: nasonex 0.05% aqueous nasal spray                              | 0.0208  | 0.1485 | 0.1401  | 0.8886 |
| UKB   | Non-cancer illness code, self-reported: myositis/myopathy                                 | -0.049  | 0.35   | -0.14   | 0.8887 |
| UKB   | Diagnoses - main ICD10: G50 Disorders of trigeminal nerve                                 | 0.0334  | 0.2412 | 0.1385  | 0.8898 |
| UKB   | Diagnoses - main ICD10: E16 Other disorders of pancreatic internal secretion              | 0.0208  | 0.1525 | 0.1365  | 0.8914 |
| UKB   | Diagnoses - main ICD10: N60 Benign mammary dysplasia                                      | -0.0174 | 0.128  | -0.1356 | 0.8921 |
| UKB   | Diagnoses - main ICD10: G51 Facial nerve disorders                                        | 0.7112  | 5.2522 | 0.1354  | 0.8923 |
| UKB   | Treatment/medication code: cardura 1mg tablet                                             | -0.0207 | 0.1568 | -0.1319 | 0.8951 |
| UKB   | Treatment/medication code: livial 2.5mg tablet                                            | -0.0265 | 0.2019 | -0.1312 | 0.8956 |
| UKB   | Non-cancer illness code, self-reported: meningitis                                        | 0.7907  | 6.0469 | 0.1308  | 0.896  |
| UKB   | Treatment/medication code: lithium product                                                | 0.0285  | 0.2201 | 0.1296  | 0.8969 |
| UKB   | Non-cancer illness code, self-reported: venous thromboembolic disease                     | -0.0203 | 0.16   | -0.1271 | 0.8989 |
| UKB   | Treatment/medication code: liothyronine                                                   | -0.0271 | 0.2139 | -0.1269 | 0.8991 |
| UKB   | Diagnoses - main ICD10: S76 Injury of muscle and tendon at hip and thigh level            | -0.0227 | 0.1844 | -0.1231 | 0.9021 |
| LDHUB | Mean Putamen                                                                              | 0.0097  | 0.0799 | 0.1212  | 0.9035 |
| UKB   | Treatment/medication code: lisinopril+hydrochlorothiazide 10mg/12.5mg tablet              | 0.0185  | 0.1568 | 0.1183  | 0.9058 |
| UKB   | Treatment/medication code: adalate 10mg capsule                                           | 0.0191  | 0.1634 | 0.117   | 0.9068 |
| UKB   | Non-cancer illness code, self-reported: vitiligo                                          | 0.024   | 0.205  | 0.117   | 0.9069 |
| LDHUB | Average number of methylene groups per a double bond                                      | -0.0095 | 0.0817 | -0.1164 | 0.9073 |
| UKB   | Treatment/medication code: strontium product                                              | -0.0143 | 0.124  | -0.1157 | 0.9079 |
| UKB   | Cancer code, self-reported: tongue cancer                                                 | -0.0182 | 0.1595 | -0.1138 | 0.9094 |
| UKB   | Non-cancer illness code, self-reported: asbestosis                                        | -0.0333 | 0.2942 | -0.1132 | 0.9099 |
| UKB   | Non-cancer illness code, self-reported: malaria                                           | -0.0329 | 0.2917 | -0.1128 | 0.9102 |
| UKB   | Treatment/medication code: uniphyllin continus 200mg m/r tablet                           | 0.1511  | 1.3412 | 0.1127  | 0.9103 |
| UKB   | Diagnoses - main ICD10: M60 Myositis                                                      | 0.022   | 0.1968 | 0.1117  | 0.911  |
| LDHUB | Total cholesterol in small LDL                                                            | 0.0167  | 0.1509 | 0.1105  | 0.912  |
| UKB   | Diagnoses - main ICD10: C21 Malignant neoplasm of anus and anal canal                     | -0.0332 | 0.3096 | -0.1074 | 0.9145 |
| UKB   | Diagnoses - main ICD10: R79 Other abnormal findings of blood chemistry                    | 0.0153  | 0.1428 | 0.1071  | 0.9147 |
| UKB   | Treatment/medication code: slozem 120mg m/r capsule                                       | -0.0163 | 0.1554 | -0.105  | 0.9163 |
| UKB   | Non-cancer illness code, self-reported: varicose veins                                    | -0.0111 | 0.1065 | -0.104  | 0.9172 |
| UKB   | Diagnoses - main ICD10: Z52 Donors of organs and tissues                                  | 0.0162  | 0.1568 | 0.1032  | 0.9178 |
| UKB   | Diagnoses - main ICD10: A41 Other septicaemia                                             | 0.0374  | 0.3653 | 0.1023  | 0.9185 |
| UKB   | Diagnoses - main ICD10: L40 Psoriasis                                                     | -0.0143 | 0.1396 | -0.1022 | 0.9186 |
| UKB   | Non-cancer illness code, self-reported: trigeminal neuralgia                              | 0.0183  | 0.1795 | 0.1019  | 0.9188 |
| UKB   | Diagnoses - main ICD10: Z00 General examination and investigation of persons without comp | 0.0211  | 0.2113 | 0.0997  | 0.9205 |
| UKB   | Home area population density - urban or rural: Postcode not linkable                      | 0.0318  | 0.3192 | 0.0997  | 0.9206 |
| LDHUB | Concentration of IDL particles                                                            | 0.0133  | 0.1338 | 0.0997  | 0.9206 |
| UKB   | Underlying (primary) cause of death: ICD10: I25.5 Ischaemic cardiomyopathy                | -0.333  | 3.3428 | -0.0996 | 0.9207 |
| LDHUB | Concentration of medium VLDL particles                                                    | -0.007  | 0.071  | -0.0991 | 0.9211 |
| UKB   | Treatment/medication code: becotide 50 inhaler                                            | 0.0104  | 0.1058 | 0.0984  | 0.9216 |
| UKB   | Diagnoses - main ICD10: C02 Malignant neoplasm of other and unspecified parts of tongue   | 0.0109  | 0.1114 | 0.0974  | 0.9224 |
| LDHUB | Glucose                                                                                   | 0.0084  | 0.087  | 0.097   | 0.9227 |
| UKB   | Treatment/medication code: acrivastine                                                    | 0.0297  | 0.3102 | 0.0957  | 0.9238 |
| UKB   | Non-cancer illness code, self-reported: retinal detachment                                | -0.0151 | 0.1582 | -0.0954 | 0.924  |

|       |                                                                                              |         |         |         |        |
|-------|----------------------------------------------------------------------------------------------|---------|---------|---------|--------|
| UKB   | Non-cancer illness code, self-reported: optic neuritis                                       | -0.0357 | 0.3762  | -0.0949 | 0.9244 |
| UKB   | Diagnoses - main ICD10: R50 Fever of unknown origin                                          | -0.0118 | 0.1255  | -0.0936 | 0.9254 |
| UKB   | Treatment/medication code: hydroxycarbamide                                                  | -0.017  | 0.1815  | -0.0935 | 0.9255 |
| UKB   | Diagnoses - main ICD10: D37 Neoplasm of uncertain or unknown behaviour of oral cavity and    | -0.0285 | 0.3142  | -0.0907 | 0.9277 |
| UKB   | Treatment/medication code: triamcinolone                                                     | -0.0225 | 0.2516  | -0.0894 | 0.9288 |
| UKB   | Illnesses of father: Heart disease                                                           | 0.0048  | 0.0544  | 0.0892  | 0.929  |
| UKB   | Handedness (chirality/laterality): Left-handed                                               | 0.0079  | 0.0887  | 0.089   | 0.9291 |
| UKB   | Cancer code, self-reported: bladder cancer                                                   | -0.0302 | 0.3402  | -0.0889 | 0.9292 |
| UKB   | Treatment/medication code: penicillin v                                                      | -0.0327 | 0.3789  | -0.0863 | 0.9312 |
| UKB   | Treatment/medication code: co-enzyme q10/ubiquinone/bio-quinone/coenzyme q10                 | 0.0233  | 0.2734  | 0.0853  | 0.9321 |
| UKB   | Non-cancer illness code, self-reported: umbilical hernia                                     | 0.0124  | 0.1467  | 0.0845  | 0.9326 |
| UKB   | Diagnoses - main ICD10: N28 Other disorders of kidney and ureter, not elsewhere classified   | 0.0223  | 0.2651  | 0.084   | 0.9331 |
| UKB   | Treatment/medication code: half-inalderal la 80mg m/r capsule                                | 0.0136  | 0.1622  | 0.0836  | 0.9334 |
| UKB   | Diagnoses - main ICD10: H65 Nonsuppurative otitis media                                      | 0.0171  | 0.2087  | 0.0819  | 0.9348 |
| LDHUB | Neo-openness to experience                                                                   | -0.0086 | 0.106   | -0.0807 | 0.9356 |
| LDHUB | Phospholipids in large HDL                                                                   | -0.0073 | 0.0935  | -0.0779 | 0.9379 |
| UKB   | Cancer code, self-reported: eye and/or adnexal cancer                                        | 0.0124  | 0.1611  | 0.0767  | 0.9389 |
| UKB   | Treatment/medication code: calcium carbonate+cholecalciferol 1.25g/200iu tablet              | 0.0121  | 0.1593  | 0.0761  | 0.9394 |
| UKB   | Diagnoses - main ICD10: S01 Open wound of head                                               | 0.0142  | 0.189   | 0.0753  | 0.94   |
| LDHUB | Valine                                                                                       | -0.008  | 0.1072  | -0.0745 | 0.9406 |
| UKB   | Diagnoses - main ICD10: I51 Complications and ill-defined descriptions of heart disease      | -0.014  | 0.1888  | -0.0743 | 0.9408 |
| UKB   | Treatment/medication code: travoprost                                                        | -0.5213 | 7.3129  | -0.0713 | 0.9432 |
| UKB   | Diagnoses - main ICD10: Z53 Persons encountering health services for specific procedures, nc | 0.0132  | 0.1859  | 0.071   | 0.9434 |
| UKB   | Underlying (primary) cause of death: ICD10: C22.0 Liver cell carcinoma                       | 0.1719  | 2.4385  | 0.0705  | 0.9438 |
| UKB   | Treatment/medication code: cetirizine                                                        | 0.0065  | 0.0921  | 0.0702  | 0.944  |
| LDHUB | Concentration of very small VLDL particles                                                   | 0.0066  | 0.0939  | 0.0701  | 0.9441 |
| UKB   | Treatment/medication code: isotard 25xl m/r tablet                                           | -0.026  | 0.3783  | -0.0688 | 0.9452 |
| UKB   | Cancer code, self-reported: liver/hepatocellular cancer                                      | -0.0102 | 0.1495  | -0.0684 | 0.9454 |
| UKB   | Treatment/medication code: nasobec aqueous 50micrograms nasal spray                          | 0.0585  | 0.8711  | 0.0672  | 0.9464 |
| UKB   | Treatment/medication code: ortho-gynest 500micrograms pessary                                | -0.0205 | 0.3168  | -0.0648 | 0.9483 |
| UKB   | Non-cancer illness code, self-reported: malabsorption/coeliac disease                        | -0.0066 | 0.1093  | -0.0603 | 0.9519 |
| UKB   | Treatment/medication code: phenobarbitone                                                    | 0.0154  | 0.2768  | 0.0557  | 0.9555 |
| LDHUB | Concentration of small VLDL particles                                                        | -0.0042 | 0.0791  | -0.0532 | 0.9576 |
| LDHUB | Triglycerides in very small VLDL                                                             | -0.0044 | 0.084   | -0.0529 | 0.9578 |
| LDHUB | Total lipids in small VLDL                                                                   | 0.0043  | 0.0822  | 0.0521  | 0.9584 |
| UKB   | Cancer code, self-reported: primary bone cancer                                              | -0.0143 | 0.2798  | -0.0511 | 0.9592 |
| LDHUB | Mean Hippocampus                                                                             | -0.0049 | 0.0969  | -0.051  | 0.9593 |
| UKB   | Non-cancer illness code, self-reported: cellulitis                                           | -0.0108 | 0.2127  | -0.0507 | 0.9596 |
| UKB   | Underlying (primary) cause of death: ICD10: C81.9 Hodgkin's disease, unspecified             | -0.0107 | 0.2132  | -0.05   | 0.9602 |
| LDHUB | Total lipids in IDL                                                                          | 0.0069  | 0.1385  | 0.0497  | 0.9603 |
| UKB   | Bipolar disorder status                                                                      | 0.0078  | 0.1607  | 0.0484  | 0.9614 |
| UKB   | Treatment/medication code: anadin tablet                                                     | -0.0091 | 0.192   | -0.0476 | 0.9621 |
| LDHUB | Phospholipids in very small VLDL                                                             | 0.0054  | 0.1157  | 0.0464  | 0.963  |
| UKB   | Non-cancer illness code, self-reported: thyroid goitre                                       | 0.0053  | 0.1177  | 0.0446  | 0.9644 |
| UKB   | Treatment/medication code: beclometasone dipropionate+salbutamol                             | -0.0115 | 0.2634  | -0.0436 | 0.9653 |
| UKB   | Non-cancer illness code, self-reported: gestational hypertension/pre-eclampsia               | 0.0059  | 0.148   | 0.0401  | 0.968  |
| UKB   | Non-cancer illness code, self-reported: retinal problem                                      | -0.0158 | 0.4007  | -0.0395 | 0.9685 |
| UKB   | Treatment/medication code: manevac granules                                                  | -0.0143 | 0.3691  | -0.0388 | 0.969  |
| UKB   | Treatment/medication code: climagest 1mg tablet                                              | 0.4481  | 12.0461 | 0.0372  | 0.9703 |
| UKB   | Treatment/medication code: vitamin k product                                                 | -0.0064 | 0.1732  | -0.0369 | 0.9706 |
| LDHUB | Total cholesterol in small VLDL                                                              | 0.0038  | 0.1056  | 0.0363  | 0.971  |
| UKB   | Non-cancer illness code, self-reported: bell's palsy/facial nerve palsy                      | -0.0048 | 0.1331  | -0.0361 | 0.9712 |
| UKB   | Surgery/amputation of toe or leg: Yes, toes                                                  | 0.0045  | 0.1312  | 0.0342  | 0.9727 |
| UKB   | Treatment/medication code: tranexamic acid                                                   | -0.0696 | 2.0664  | -0.0337 | 0.9731 |
| UKB   | Non-cancer illness code, self-reported: fracture radius                                      | 0.0069  | 0.2147  | 0.0319  | 0.9745 |
| UKB   | Non-cancer illness code, self-reported: urinary tract infection/kidney infection             | 0.003   | 0.0958  | 0.0312  | 0.9751 |
| UKB   | Treatment/medication code: ventolin 2mg tablet                                               | 0.008   | 0.2657  | 0.0302  | 0.9759 |
| UKB   | Diagnoses - main ICD10: D27 Benign neoplasm of ovary                                         | 0.0038  | 0.1359  | 0.0281  | 0.9776 |
| UKB   | Treatment/medication code: co-careldopa                                                      | -0.006  | 0.2155  | -0.028  | 0.9777 |
| UKB   | Treatment/medication code: asacol 400mg e/c tablet                                           | 0.0055  | 0.1983  | 0.0276  | 0.978  |
| UKB   | Average monthly champagne plus white wine intake                                             | -0.0036 | 0.1298  | -0.0275 | 0.9781 |
| UKB   | Treatment/medication code: celiprolol                                                        | 0.0056  | 0.2116  | 0.0266  | 0.9788 |
| UKB   | Eye problems/disorders: Glaucoma                                                             | -0.0016 | 0.0739  | -0.021  | 0.9832 |

|       |                                                                                      |           |        |         |        |
|-------|--------------------------------------------------------------------------------------|-----------|--------|---------|--------|
| LDHUB | Serum total cholesterol                                                              | 0.0028    | 0.1373 | 0.0204  | 0.9837 |
| UKB   | Treatment/medication code: dexamethasone                                             | 0.0068    | 0.3375 | 0.0202  | 0.9839 |
| UKB   | Treatment/medication code: metronidazole product                                     | -0.0026   | 0.1515 | -0.017  | 0.9864 |
| UKB   | Underlying (primary) cause of death: ICD10: I71.1 Thoracic aortic aneurysm, ruptured | -0.0062   | 0.3809 | -0.0162 | 0.987  |
| UKB   | Diagnoses - main ICD10: K13 Other diseases of lip and oral mucosa                    | 0.0054    | 0.3351 | 0.0161  | 0.9871 |
| UKB   | Treatment/medication code: oestrogen product                                         | -0.0029   | 0.1811 | -0.0159 | 0.9873 |
| LDHUB | Phospholipids in small VLDL                                                          | -0.0014   | 0.0857 | -0.0159 | 0.9873 |
| LDHUB | Total Cholesterol                                                                    | 0.0007    | 0.0429 | 0.0152  | 0.9878 |
| UKB   | Cochlear implant                                                                     | -0.0023   | 0.1966 | -0.0119 | 0.9905 |
| UKB   | Cancer code, self-reported: breast cancer                                            | 0.0009    | 0.0833 | 0.0111  | 0.9911 |
| UKB   | Diagnoses - main ICD10: R15 Faecal incontinence                                      | 0.0029    | 0.2576 | 0.0111  | 0.9912 |
| UKB   | Illnesses of siblings: Bowel cancer                                                  | 0.0009    | 0.1154 | 0.0075  | 0.994  |
| UKB   | Diagnoses - main ICD10: C44 Other malignant neoplasms of skin                        | 0.0006    | 0.0807 | 0.007   | 0.9944 |
| UKB   | Non-cancer illness code, self-reported: mania/bipolar disorder/manic depression      | -0.0005   | 0.0873 | -0.0056 | 0.9955 |
| UKB   | Treatment/medication code: prednisolone product                                      | -0.0006   | 0.1549 | -0.0038 | 0.9969 |
| UKB   | Treatment/medication code: calcium salts                                             | -0.0002   | 0.2475 | -0.0009 | 0.9992 |
| UKB   | Diagnoses - main ICD10: C83 Diffuse non-Hodgkin's lymphoma                           | 6.20E-05  | 0.2566 | 0.0002  | 0.9998 |
| LDHUB | Total cholesterol in IDL                                                             | -1.47E-05 | 0.1444 | -0.0001 | 0.9999 |

**Table S9a.** Curated List of IPA Diseases or Functions (Top Unique Categories)

| Categories                                       | Diseases or Functions Annotation               | p-Value  | # Molecules |
|--------------------------------------------------|------------------------------------------------|----------|-------------|
| Cancer                                           | Endocrine carcinoma                            | 2.04E-07 | 167         |
| Carbohydrate Metabolism                          | Phosphorylation of carbohydrate                | 0.000061 | 5           |
| Cell Cycle                                       | Spindle checkpoint of tumor cell lines         | 0.000124 | 4           |
| Cell-To-Cell Signaling and Interaction           | Signaling of myeloid cells                     | 0.000264 | 3           |
| Cellular Assembly and Organization               | Translocation of Golgi vesicles                | 0.000299 | 2           |
| Hereditary Disorder                              | Charcot-Marie-Tooth disease type 4B            | 0.000299 | 2           |
| Cell Death and Survival                          | Anoikis of stomach cancer cell lines           | 0.000299 | 2           |
| Molecular Transport                              | Secretion of molecule                          | 0.00042  | 19          |
| Lipid Metabolism                                 | Phosphorylation of lipid                       | 0.000502 | 4           |
| Cell Morphology                                  | Length of dendrites                            | 0.000502 | 4           |
| Behavior                                         | Self-administration                            | 0.000506 | 3           |
| Cellular Development                             | Development of kidney cell lines               | 0.000746 | 4           |
| Gastrointestinal Disease                         | Crohn disease                                  | 0.000945 | 10          |
| Cellular Compromise                              | Degeneration of male germ cells                | 0.000982 | 2           |
| Developmental Disorder                           | Autosomal dominant mental retardation          | 0.00129  | 6           |
| Cellular Movement                                | Migration of carcinoma cells                   | 0.00173  | 3           |
| Cellular Growth and Proliferation                | Colony formation of fibroblast cell lines      | 0.00202  | 6           |
| Cellular Function and Maintenance                | Homeostasis of neutrophils                     | 0.00204  | 2           |
| Embryonic Development                            | Tubulogenesis                                  | 0.00211  | 4           |
| Infectious Diseases                              | Viral Infection                                | 0.0022   | 38          |
| Cellular Response to Therapeutics                | Radiosensitivity of prostate cancer cell lines | 0.0027   | 2           |
| Behavior,Nervous System Development and Function | Contextual fear memory                         | 0.00344  | 2           |
| Cardiovascular System Development and Function   | Contractility of cardiomyocytes                | 0.00399  | 3           |
| Organ Morphology                                 | Quantity of germ cells                         | 0.00475  | 7           |
| Cell Signaling                                   | Hydrolysis of GTP                              | 0.00486  | 4           |
| Nervous System Development and Function          | Density of neurons                             | 0.00579  | 6           |
| Immunological Disease                            | Passive systemic anaphylaxis                   | 0.00619  | 2           |
| Neurological Disease                             | Frontotemporal dementia                        | 0.00649  | 3           |
| Organismal Injury and Abnormalities              | Neurogenic muscular atrophy                    | 0.00898  | 4           |
| Tissue Development                               | Development of epithelial tissue               | 0.00915  | 15          |

|                        |                 |         |    |
|------------------------|-----------------|---------|----|
| Cardiovascular Disease | Atherosclerosis | 0.00943 | 14 |
|------------------------|-----------------|---------|----|



**Table S9b. Ingenuity IPA Top Canonical Pathways**

| <b>Name</b>                                                    | <b>p-value</b>        | <b>Overlap</b> |
|----------------------------------------------------------------|-----------------------|----------------|
| MSP-RON Signaling Pathway                                      | $8.92 \times 10^{-4}$ | 6.8% 5/74      |
| Macropinocytosis Signaling                                     | $2.04 \times 10^{-3}$ | 5.6% 5/89      |
| Fc Receptor-mediated Phagocytosis in Macrophages and Monocytes | $2.35 \times 10^{-3}$ | 5.4% 5/92      |
| Virus Entry via Endocytic Pathways                             | $6.80 \times 10^{-3}$ | 4.2% 5/118     |
| Paxillin Signaling                                             | $7.54 \times 10^{-3}$ | 4.1% 5/121     |

## Million Veteran Program: Consortium Acknowledgement for Manuscripts

### MVP Executive Committee

- Co-Chair: J. Michael Gaziano, M.D., M.P.H.<sup>1</sup>
- Co-Chair: Rachel Ramoni, D.M.D., Sc.D.<sup>2</sup>
- Jim Breeling, M.D. (ex-officio)<sup>2</sup>
- Kyong-Mi Chang, M.D.<sup>3</sup>
- Grant Huang, Ph.D.<sup>4</sup>
- Sumitra Muralidhar, Ph.D.<sup>2</sup>
- Christopher J. O'Donnell, M.D., M.P.H.<sup>1</sup>
- Philip S. Tsao, Ph.D.<sup>5</sup>

### MVP Program Office

- Sumitra Muralidhar, Ph.D.<sup>2</sup>
- Jennifer Moser, Ph.D.<sup>2</sup>

### MVP Recruitment/Enrollment

- Recruitment/Enrollment Director/Deputy Director, Boston – Stacey B. Whitbourne, Ph.D.<sup>1</sup>; Jessica V. Brewer, M.P.H.<sup>6</sup>
- MVP Coordinating Centers
  - o Clinical Epidemiology Research Center (CERC), West Haven – John Concato, M.D.<sup>7</sup>
  - o Cooperative Studies Program Clinical Research Pharmacy Coordinating Center, Albuquerque - Stuart Warren, J.D., Pharm D.<sup>8</sup>; Dean P. Argyres, M.S.<sup>8</sup>
  - o Genomics Coordinating Center, Palo Alto – Philip S. Tsao, Ph.D.<sup>5</sup>
  - o Massachusetts Veterans Epidemiology Research Information Center (MAVERIC), Boston - J. Michael Gaziano, M.D., M.P.H.<sup>1</sup>
  - o MVP Information Center, Canandaigua – Brady Stephens, M.S.<sup>9</sup>
- Core Biorepository, Boston – Mary T. Brophy M.D., M.P.H.<sup>1</sup>; Donald E. Humphries, Ph.D.<sup>1</sup>
- MVP Informatics, Boston – Nhan Do, M.D.<sup>1</sup>; Shahpoor Shayan<sup>1</sup>
- Data Operations/Analytics, Boston – Xuan-Mai T. Nguyen, Ph.D.<sup>1</sup>

### MVP Science

- Genomics - Christopher J. O'Donnell, M.D., M.P.H.<sup>1</sup>; Saiju Pyarajan Ph.D.<sup>1</sup>; Philip S. Tsao, Ph.D.<sup>5</sup>
- Phenomics - Kelly Cho, M.P.H, Ph.D.<sup>1</sup>
- Data and Computational Sciences – Saiju Pyarajan, Ph.D.<sup>1</sup>

- Statistical Genetics – Elizabeth Hauser, Ph.D.<sup>10</sup>; Yan Sun, Ph.D.<sup>11</sup>; Hongyu Zhao, Ph.D.<sup>7</sup>

<sup>1</sup> Massachusetts Area Veterans Epidemiology Research and Information Center (MAVERIC), VA Cooperative Studies Program, VA Boston Healthcare System, Boston MA

<sup>2</sup> Office of Research and Development, Department of Veterans Affairs, Washington, DC

<sup>3</sup> Medical Research, The Corporal Michael J. Crescenz VA Medical Center, Philadelphia PA

<sup>4</sup> Cooperative Studies Program Central Office, Department of Veterans Affairs Office of Research & Development, Washington, DC

<sup>5</sup> VA Palo Alto Health Care System, Department of Medicine, Stanford University School of Medicine, Stanford, CA

<sup>6</sup> Boston VA Research Institute, Boston MA

<sup>7</sup> VA Clinical Epidemiology Research Center (CERC), VA Connecticut Healthcare System, West Haven, CT

<sup>8</sup> Cooperative Studies Program Clinical Research Pharmacy Coordinating Center, New Mexico VA Healthcare System, Albuquerque, NM

<sup>9</sup> Center of Excellence for Suicide Prevention, Canandaigua VA Medical Center, Canandaigua, NY

<sup>10</sup> Cooperative Studies Program Epidemiology Center, Durham Veterans Affairs Medical Center, Durham, NC

<sup>11</sup> Atlanta Veterans Affairs Healthcare System, Decatur, GA

### **MVP Local Site Investigators**

- Atlanta VA Medical Center (Peter Wilson)
- Bay Pines VA Healthcare System (Rachel McArdle)
- Birmingham VA Medical Center (Louis Dellitalia)
- Cincinnati VA Medical Center (John Harley)
- Clement J. Zablocki VA Medical Center (Jeffrey Whittle)
- Durham VA Medical Center (Jean Beckham)
- Edith Nourse Rogers Memorial Veterans Hospital (John Wells)
- Edward Hines, Jr. VA Medical Center (Salvador Gutierrez)
- Fayetteville VA Medical Center (Gretchen Gibson)
- VA Health Care Upstate New York (Laurence Kaminsky)
- New Mexico VA Health Care System (Gerardo Villareal)
- VA Boston Healthcare System (Scott Kinlay)
- VA Western New York Healthcare System (Junzhe Xu)
- Ralph H. Johnson VA Medical Center (Mark Hamner)
- Wm. Jennings Bryan Dorn VA Medical Center (Kathlyn Sue Haddock)
- VA North Texas Health Care System (Sujata Bhushan)
- Hampton VA Medical Center (Pran Iruvanti)
- Hunter Holmes McGuire VA Medical Center (Michael Godschalk)

- Iowa City VA Health Care System (Zuhair Ballas)
- Jack C. Montgomery VA Medical Center (Malcolm Buford)
- James A. Haley Veterans' Hospital (Stephen Mastorides)
- Louisville VA Medical Center (Jon Klein)
- Manchester VA Medical Center (Nora Ratcliffe)
- Miami VA Health Care System (Hermes Florez)
- Michael E. DeBakey VA Medical Center (Alan Swann)
- Minneapolis VA Health Care System (Maureen Murdoch)
- N. FL/S. GA Veterans Health System (Peruvemba Sriram)
- Northport VA Medical Center (Shing Shing Yeh)
- Overton Brooks VA Medical Center (Ronald Washburn)
- Philadelphia VA Medical Center (Darshana Jhala)
- Phoenix VA Health Care System (Samuel Aguayo)
- Portland VA Medical Center (David Cohen)
- Providence VA Medical Center (Satish Sharma)
- Richard Roudebush VA Medical Center (John Callaghan)
- Salem VA Medical Center (Kris Ann Oursler)
- San Francisco VA Health Care System (Mary Whooley)
- South Texas Veterans Health Care System (Sunil Ahuja)
- Southeast Louisiana Veterans Health Care System (Amparo Gutierrez)
- Southern Arizona VA Health Care System (Ronald Schifman)
- Sioux Falls VA Health Care System (Jennifer Greco)
- St. Louis VA Health Care System (Michael Rauchman)
- Syracuse VA Medical Center (Richard Servatius)
- VA Eastern Kansas Health Care System (Mary Oehlert)
- VA Greater Los Angeles Health Care System (Agnes Wallbom)
- VA Loma Linda Healthcare System (Ronald Fernando)
- VA Long Beach Healthcare System (Timothy Morgan)
- VA Maine Healthcare System (Todd Stapley)
- VA New York Harbor Healthcare System (Scott Sherman)
- VA Pacific Islands Health Care System (Gwenevere Anderson)
- VA Palo Alto Health Care System (Philip Tsao)
- VA Pittsburgh Health Care System (Elif Sonel)
- VA Puget Sound Health Care System (Edward Boyko)
- VA Salt Lake City Health Care System (Laurence Meyer)
- VA San Diego Healthcare System (Samir Gupta)
- VA Southern Nevada Healthcare System (Joseph Fayad)
- VA Tennessee Valley Healthcare System (Adriana Hung)

- Washington DC VA Medical Center (Jack Lichy)
- W.G. (Bill) Hefner VA Medical Center (Robin Hurley)
- White River Junction VA Medical Center (Brooks Robey)
- William S. Middleton Memorial Veterans Hospital (Robert Striker)
